# Supplementary material for: Long Non-Coding RNA Levels Are Modulated in Schistosoma mansoni following In Vivo Praziquantel Exposure
Source: Noncoding RNA. 2024 Apr 19;10(2):27. doi: 10.3390/ncrna10020027 (PMC11053911; doi:10.3390/ncrna10020027)
Supplement: Supplementary file 1 [file ncrna-10-00027-s001.zip › Proof-Ms-Poli-Supp-tables-sent.xlsx]

## Sheet: Table S1
Table S1. RNA-Seq samples analyzed and alignment statistics
Samples from https://www.ncbi.nlm.nih.gov/sra
Study: Time course of Schistosoma mansoni transcriptional response to in vivo praziquantel exposure
Submitted by: Medical College of Wisconsin
Project Accession Number: PRJNA602528
Study: Transcriptional response of Schistosoma mansoni to in vivo praziquantel exposure
Submitted by: Medical College of Wisconsin
Project Accession Number: PRJNA597909
PRJNA602528
Sample Run Code	Age	Sample Name
SRR10947815	7 weeks	PZQ 96hr
SRR10947816	7 weeks	PZQ 48hr
SRR10947817	7 weeks	PZQ 24hr
SRR10947818	7 weeks	PZQ 12hr
SRR10947819	7 weeks	PZQ 9hr
SRR10947820	7 weeks	PZQ 6hr
SRR10947821	7 weeks	PZQ 3hr
SRR10947822	7 weeks	PZQ 1hr
SRR10947823	7 weeks	PZQ 15 min
SRR10947824	7 weeks	no drug
PRJNA597909
Sample Run Code	Age	Sample Name
SRR10776754	4 weeks	JUV_PZQ_E
SRR10776755	4 weeks	JUV_PZQ_D
SRR10776756	4 weeks	JUV_PZQ_C
SRR10776757	4 weeks	JUV_PZQ_B
SRR10776758	4 weeks	JUV_PZQ_A
SRR10776759	4 weeks	JUV_CTRL_E
SRR10776760	4 weeks	JUV_CTRL_D
SRR10776761	4 weeks	JUV_CTRL_C
SRR10776762	7 weeks	ADULT_PZQ_E
SRR10776763	7 weeks	ADULT_PZQ_D
SRR10776764	7 weeks	ADULT_PZQ_C
SRR10776765	7 weeks	ADULT_PZQ_B
SRR10776766	7 weeks	ADULT_PZQ_A
SRR10776767	7 weeks	ADULT_CTRL_E
SRR10776768	7 weeks	ADULT_CTRL_D
SRR10776769	7 weeks	ADULT_CTRL_C
SRR10776770	7 weeks	ADULT_CTRL_B
SRR10776771	7 weeks	ADULT_CTRL_A
SRR10776772	4 weeks	JUV_CTRL_B
SRR10776773	4 weeks	JUV_CTRL_A
Project Accession Number	PRJNA602528										PRJNA597909
SRA - SRR code	SRR10947815	SRR10947816	SRR10947817	SRR10947818	SRR10947819	SRR10947820	SRR10947821	SRR10947822	SRR10947823	SRR10947824	SRR10776754	SRR10776755	SRR10776756	SRR10776757	SRR10776758	SRR10776759	SRR10776760	SRR10776761	SRR10776762	SRR10776763	SRR10776764	SRR10776765	SRR10776766	SRR10776767	SRR10776768	SRR10776769	SRR10776770	SRR10776771	SRR10776772	SRR10776773
SRA Sample name	PZQ 96hr	PZQ 48hr	PZQ 24hr	PZQ 12hr	PZQ 9hr	PZQ 6hr	PZQ 3hr	PZQ 1hr	PZQ 15 min	no drug	JUV_PZQ_E	JUV_PZQ_D	JUV_PZQ_C	JUV_PZQ_B	JUV_PZQ_A	JUV_CTRL_E	JUV_CTRL_D	JUV_CTRL_C	ADULT_PZQ_E	ADULT_PZQ_D	ADULT_PZQ_C	ADULT_PZQ_B	ADULT_PZQ_A	ADULT_CTRL_E	ADULT_CTRL_D	ADULT_CTRL_C	ADULT_CTRL_B	ADULT_CTRL_A	JUV_CTRL_B	JUV_CTRL_A
Number of input reads	25042216	24672532	22261907	22095366	22392221	19798013	21781725	21726828	25124102	24808516	19671128	20178520	20627667	18781538	20741620	21746276	20244591	19873692	25169663	23937251	21599341	23886905	21746930	22060394	23312019	23965963	23797561	22820302	19928606	20767947
UNIQUE READS:
Uniquely mapped reads number	16725658	18184806	17574422	17269055	16637518	15572349	16786530	17103676	20486359	20150782	16946321	17410369	17886215	16269215	18077066	18772872	17563062	17250863	21555379	20285400	18755519	20569800	18631571	18688886	19900861	20352223	20280791	19530341	17196335	17980532
Uniquely mapped reads %	0.6679	0.737	0.7894	0.7816	0.743	0.7866	0.7707	0.7872	0.8154	0.8123	0.8615	0.8628	0.8671	0.8662	0.8715	0.8633	0.8675	0.868	0.8564	0.8474	0.8683	0.8611	0.8567	0.8472	0.8537	0.8492	0.8522	0.8558	0.8629	0.8658
MULTI-MAPPING READS:
Number of reads mapped to multiple loci	2074336	2263497	2387686	2391625	2268693	2191417	2328192	2337409	2890667	2763533	1860338	1929490	1908059	1665707	1919647	2016867	1854902	1812133	2471984	2304146	2010815	2266875	2035713	2228975	2332067	2272094	2385528	2284924	1889704	1968671
% of reads mapped to multiple loci	0.0828	0.0917	0.1073	0.1082	0.1013	0.1107	0.1069	0.1076	0.1151	0.1114	0.0946	0.0956	0.0925	0.0887	0.0926	0.0927	0.0916	0.0912	0.0982	0.0963	0.0931	0.0949	0.0936	0.101	0.1	0.0948	0.1002	0.1001	0.0948	0.0948
Number of reads mapped to too many loci	409913	2477394	911585	1502302	2616079	1219328	1654553	1420231	684984	921386	199203	216561	223660	294418	228685	241193	192026	171902	327194	334225	215939	359841	495328	469230	315407	495543	300085	274681	185817	184617
% of reads mapped to too many loci	0.0164	0.1004	0.0409	0.068	0.1168	0.0616	0.076	0.0654	0.0273	0.0371	0.0101	0.0107	0.0108	0.0157	0.011	0.0111	0.0095	0.0086	0.013	0.014	0.01	0.0151	0.0228	0.0213	0.0135	0.0207	0.0126	0.012	0.0093	0.0089
UNMAPPED READS:
% of reads unmapped: too many mismatches	0	0	0	0	0	0	0	0	0	0	0	0	0	0	0	0	0	0	0	0	0	0	0	0	0	0	0	0	0	0
% of reads unmapped: too short	0.2199	0.0516	0.0482	0.0232	0.0147	0.0209	0.0171	0.0134	0.0148	0.0131	0.0181	0.0165	0.0152	0.015	0.0103	0.017	0.0157	0.0174	0.0176	0.0268	0.0142	0.0128	0.0112	0.0129	0.0144	0.0182	0.0147	0.017	0.0171	0.016
% of reads unmapped: other	0.013	0.0192	0.0142	0.019	0.0242	0.0202	0.0293	0.0264	0.0275	0.0261	0.0157	0.0143	0.0144	0.0144	0.0146	0.0159	0.0156	0.0147	0.0148	0.0155	0.0143	0.0161	0.0157	0.0176	0.0184	0.0171	0.0202	0.015	0.0159	0.0145
CHIMERIC READS:
Number of chimeric reads	0	0	0	0	0	0	0	0	0	0	0	0	0	0	0	0	0	0	0	0	0	0	0	0	0	0	0	0	0	0
% of chimeric reads	0	0	0	0	0	0	0	0	0	0	0	0	0	0	0	0	0	0	0	0	0	0	0	0	0	0	0	0	0	0

## Sheet: Table S2
Table S2. List of transcripts differentially expressed from S. mansoni adult worm couples obtained across 10 timepoints of 0, 0.25, 1, 3, 6, 9, 12, 24, 48 and 96 hours from mice after treatment with a single, curative dose of PZQ (400 mg/kg) delivered by oral gavage at 7 weeks post-infection (PRJNA602528)
transcript_ID	log2 Fold-change	log2 CPM	p-value	FDR
Smp_050270.1	-0.0573092	9.58111	1.58288e-09	1.24866e-05
Smp_063330.1	0.0337805	9.9536	2.40137e-09	1.24866e-05
Smp_020550.3	-0.0339825	6.60453	3.38367e-09	1.24866e-05
Smp_316160.1	-0.0448514	13.2134	3.58837e-09	1.24866e-05
Smp_195090.1	-0.0913277	5.79681	5.02634e-09	1.32059e-05
Smp_054010.1	-0.0465514	7.7931	6.02733e-09	1.32059e-05
Smp_191910.1	-0.0526593	13.0027	6.64135e-09	1.32059e-05
Smp_241610.1	-0.0493026	13.0826	7.97686e-09	1.36122e-05
Smp_013540.1	-0.0560456	7.85209	8.8016e-09	1.36122e-05
Smp_316140.1	-0.0459235	14.018	1.1526e-08	1.60431e-05
Smp_335050.1	-0.0503574	8.74874	1.68681e-08	2.00749e-05
Smp_055260.1	-0.0564327	5.62799	1.73072e-08	2.00749e-05
Smp_307900.1	-0.0594709	7.85487	2.69606e-08	2.73609e-05
Smp_321090.1	-0.0579409	8.15789	2.83159e-08	2.73609e-05
Smp_076320.1	-0.0908261	6.29223	3.00569e-08	2.73609e-05
Smp_019890.1	-0.0313414	4.95737	3.14516e-08	2.73609e-05
Smp_340060.1	0.0541078	10.6735	3.38331e-08	2.77014e-05
Smp_000280.1	-0.0469278	10.226	3.67724e-08	2.77705e-05
Smp_155310.1	-0.0443555	9.41019	4.04809e-08	2.77705e-05
Smp_346170.1	-0.0487751	6.59196	4.14187e-08	2.77705e-05
Smp_302980.1	-0.0584849	10.641	4.18981e-08	2.77705e-05
Smp_065530.1	-0.0491617	4.76901	4.72896e-08	2.99192e-05
Smp_346370.1	-0.0528447	5.53915	5.02394e-08	2.99423e-05
Smp_055740.1	-0.0625087	3.21001	5.16283e-08	2.99423e-05
Smp_248100.2	-0.0810496	6.82596	5.98812e-08	3.33395e-05
Smp_144440.1	-0.0496635	10.2576	6.27955e-08	3.36173e-05
Smp_058380.1	0.0435922	6.52609	7.18221e-08	3.70256e-05
Smp_316610.1	-0.0545267	7.30585	8.66478e-08	4.01958e-05
Smp_000430.1	-0.0472341	12.0976	8.79136e-08	4.01958e-05
Smp_173150.1	-0.024362	9.1231	8.92124e-08	4.01958e-05
Smp_128010.1	-0.0355861	3.41337	9.0725e-08	4.01958e-05
Smp_165360.1	-0.0658022	9.12557	9.24108e-08	4.01958e-05
Smp_016780.1	-0.0283094	7.60857	9.96128e-08	4.20155e-05
Smp_158480.1	-0.0681019	5.90065	1.13915e-07	4.51304e-05
Smp_153970.2	0.017683	5.82171	1.16621e-07	4.51304e-05
Smp_314250.1	-0.0678155	7.91245	1.16725e-07	4.51304e-05
Smp_033250.1	-0.0649288	9.47566	1.56527e-07	5.76594e-05
Smp_163220.1	0.0260011	6.23299	1.57415e-07	5.76594e-05
Smp_011000.1	0.0324008	5.72977	1.76564e-07	6.18832e-05
Smp_000420.1	-0.0463196	11.2776	1.84022e-07	6.18832e-05
Smp_267120.1	-0.0148444	5.84621	1.87347e-07	6.18832e-05
Smp_344360.1	-0.0472644	9.57354	1.879e-07	6.18832e-05
Smp_047620.1	-0.0304729	4.93573	1.94268e-07	6.18832e-05
Smp_095980.1	-0.0453922	11.5941	2.03525e-07	6.18832e-05
Smp_340760.4	-0.030054	8.36698	2.04162e-07	6.18832e-05
Smp_164400.1	-0.0505328	6.34921	2.04514e-07	6.18832e-05
Smp_322860.1	-0.0501979	4.02586	2.14078e-07	6.30564e-05
Smp_326560.1	-0.0502628	8.34169	2.17452e-07	6.30564e-05
Smp_326610.1	-0.0488754	8.41089	2.45245e-07	6.96647e-05
Smp_071050.1	0.014037	6.27565	2.52547e-07	7.00406e-05
Smp_137360.1	-0.0764794	3.17054	2.62724e-07	7.00406e-05
Smp_000390.1	-0.0413191	9.77514	2.66111e-07	7.00406e-05
Smp_340930.1	-0.0683716	6.57045	2.70671e-07	7.00406e-05
Smp_312730.1	-0.0433811	4.41078	2.7376e-07	7.00406e-05
Smp_334740.2	-0.0342361	6.35446	2.76761e-07	7.00406e-05
Smp_344950.1	-0.0232655	6.75946	2.89965e-07	7.06965e-05
Smp_135020.1	-0.0190213	6.3575	2.96417e-07	7.06965e-05
Smp_062070.1	-0.0194448	8.52888	2.98546e-07	7.06965e-05
Smp_017610.1	-0.0583755	5.14903	2.99669e-07	7.06965e-05
Smp_009600.1	-0.0262894	5.18294	3.16864e-07	7.35072e-05
SmLINC135986-IBu	-0.0568455	1.94573	3.6293e-07	8.28134e-05
Smp_176260.1	-0.0296099	4.84524	3.68908e-07	8.28198e-05
Smp_340010.1	-0.0598338	9.72882	3.89391e-07	8.60307e-05
Smp_099090.1	-0.0349588	4.52674	4.01617e-07	8.71106e-05
Smp_089670.1	0.0465539	10.567	4.06796e-07	8.71106e-05
Smp_077890.2	-0.0453373	9.47349	4.5234e-07	9.53958e-05
Smp_135230.1	-0.0694507	4.91071	4.63781e-07	9.63101e-05
Smp_341290.1	0.0524632	6.03905	4.7484e-07	9.63101e-05
Smp_025150.1	-0.0164066	6.72852	4.77434e-07	9.63101e-05
Smp_340760.2	-0.0245257	8.31676	4.96066e-07	9.82015e-05
Smp_241620.1	-0.051948	10.6983	5.08314e-07	9.82015e-05
Smp_124740.2	-0.0469689	4.58172	5.14424e-07	9.82015e-05
Smp_152940.2	0.0198123	5.62124	5.15031e-07	9.82015e-05
Smp_156340.2	-0.0287718	5.91593	5.30319e-07	9.91758e-05
Smp_306850.1	-0.0502705	6.00833	5.34391e-07	9.91758e-05
Smp_137940.1	-0.0179326	5.17018	5.47541e-07	0.000100279
Smp_172530.1	-0.0224399	5.29827	6.12178e-07	0.000110661
Smp_002510.1	-0.014027	6.37903	6.29563e-07	0.000112345
Smp_341340.1	-0.0454603	3.64034	6.45346e-07	0.000113703
Smp_011870.1	-0.0481213	5.27017	6.66729e-07	0.000113934
Smp_143460.1	-0.0248539	4.41611	6.69073e-07	0.000113934
Smp_171780.1	-0.0262846	7.90646	6.71364e-07	0.000113934
Smp_080730.1	-0.0276724	5.48268	6.79395e-07	0.000113934
Smp_103560.1	-0.0257754	6.72193	7.0043e-07	0.000116063
Smp_302850.2	-0.0629026	6.79931	7.16481e-07	0.000117326
Smp_335190.1	-0.0439224	8.24379	7.32193e-07	0.000118505
Smp_121190.1	-0.029808	4.70211	7.43422e-07	0.000118939
Smp_000270.1	-0.0411532	8.2555	7.66836e-07	0.000121291
Smp_344480.2	-0.0510293	2.72801	8.01391e-07	0.000124541
Smp_306180.1	0.0347317	2.9331	8.0528e-07	0.000124541
Smp_084890.1	-0.0164104	7.94229	8.41948e-07	0.000127953
Smp_317870.1	-0.0204366	5.45317	8.45728e-07	0.000127953
SmLNCA153794-IBu	-0.0420759	6.15384	8.83111e-07	0.000132172
Smp_179320.2	-0.0207485	5.89603	8.93559e-07	0.000132313
Smp_129960.1	-0.0340739	5.38336	9.22337e-07	0.000134127
Smp_243210.1	-0.031702	3.54271	9.25082e-07	0.000134127
Smp_319550.1	-0.034237	4.01499	9.51247e-07	0.000136499
Smp_316490.2	0.0220007	5.82988	9.71364e-07	0.000137458
Smp_318150.1	-0.0295662	7.23522	9.84772e-07	0.000137458
Smp_150150.1	0.0211055	4.00694	9.87555e-07	0.000137458
Smp_021590.1	-0.0247719	4.1013	1.0103e-06	0.000138894
Smp_214260.2	-0.0309682	4.39304	1.01783e-06	0.000138894
Smp_324380.1	-0.05293	5.58173	1.12136e-06	0.000151536
Smp_064430.1	-0.0187282	5.58538	1.13772e-06	0.000152269
Smp_309250.1	-0.0458287	9.45448	1.16149e-06	0.00015397
Smp_326540.1	-0.0448387	7.77719	1.18093e-06	0.000155069
Smp_158910.1	-0.0123141	6.87335	1.29108e-06	0.000167948
Smp_343740.1	-0.0323915	9.53324	1.33649e-06	0.000171658
Smp_141160.1	-0.0264863	3.92787	1.34426e-06	0.000171658
Smp_181390.1	-0.0253624	7.81907	1.38436e-06	0.000175172
Smp_310050.1	-0.0335524	4.67917	1.45999e-06	0.000182832
Smp_309090.1	-0.0552279	11.1899	1.47203e-06	0.000182832
SmLNCA102665-IBu	0.064945	6.63464	1.4843e-06	0.000182832
Smp_211020.1	-0.027463	4.83337	1.53295e-06	0.000185512
Smp_059790.1	-0.0327264	6.3347	1.53675e-06	0.000185512
Smp_078720.1	-0.0509065	3.13037	1.54604e-06	0.000185512
Smp_327770.1	-0.0462743	7.54054	1.61177e-06	0.000191745
SmLINC100126-IBu	-0.147881	-0.0202203	1.62906e-06	0.00019216
Smp_200530.1	-0.0222724	4.31482	1.66537e-06	0.000193905
Smp_181410.1	-0.0211889	5.70932	1.67172e-06	0.000193905
Smp_164020.1	0.0271411	4.23966	1.78519e-06	0.000205355
Smp_151660.1	-0.0553092	1.89607	1.86596e-06	0.000212888
Smp_038100.1	-0.0150176	9.37438	1.91956e-06	0.000217222
Smp_065210.1	-0.0196371	6.72527	1.96421e-06	0.000217889
Smp_124510.1	-0.0483071	4.51088	1.97236e-06	0.000217889
SmLINC110998-IBu	-0.0583915	2.23248	1.99651e-06	0.000217889
Smp_128200.1	-0.0220368	4.58352	1.999e-06	0.000217889
Smp_074150.1	-0.0209921	7.10655	2.00372e-06	0.000217889
Smp_170560.1	-0.0243429	4.96781	2.09908e-06	0.000224863
Smp_031770.1	-0.0248296	9.45691	2.10016e-06	0.000224863
Smp_112450.1	-0.0491411	7.97748	2.15537e-06	0.000227814
Smp_083730.1	0.0119961	9.66858	2.18597e-06	0.000227814
Smp_101290.2	-0.030041	7.75748	2.18987e-06	0.000227814
Smp_334900.1	0.0332157	2.63822	2.19319e-06	0.000227814
Smp_316130.1	-0.0287315	4.38213	2.29951e-06	0.000236131
Smp_329430.1	-0.0356933	5.49441	2.30719e-06	0.000236131
Smp_005290.1	-0.0113309	7.50839	2.36776e-06	0.00024056
Smp_086480.1	-0.0358069	8.39906	2.39856e-06	0.000241924
Smp_162860.1	-0.0373327	2.21516	2.43423e-06	0.000243755
Smp_056280.1	-0.0286344	3.03099	2.71751e-06	0.000270178
Smp_095360.1	-0.0170705	11.0539	2.77699e-06	0.000273436
Smp_083410.1	-0.0184855	9.61318	2.78956e-06	0.000273436
Smp_326580.1	-0.0789731	6.15319	2.83929e-06	0.000275469
Smp_316390.1	-0.0348789	6.51506	2.84989e-06	0.000275469
Smp_043220.1	-0.0237124	8.50384	2.9114e-06	0.00027667
Smp_139340.1	-0.0187977	6.71022	2.94233e-06	0.00027667
Smp_031770.2	-0.0517003	5.58946	2.94923e-06	0.00027667
Smp_094140.1	-0.0159617	6.12581	2.98246e-06	0.00027667
SmLNCA140605-IBu	-0.0948001	1.13172	3.00071e-06	0.00027667
SmLINC151259-IBu	-0.0986111	0.91781	3.00875e-06	0.00027667
Smp_054610.1	-0.0315325	4.74649	3.01165e-06	0.00027667
Smp_134590.1	-0.0212604	6.64916	3.02133e-06	0.00027667
Smp_205760.1	-0.0349974	6.64214	3.05341e-06	0.00027778
Smp_328900.1	-0.041366	3.85301	3.13423e-06	0.00028051
Smp_103380.1	-0.0147445	6.14237	3.15474e-06	0.00028051
Smp_098890.2	-0.0192483	5.91126	3.15828e-06	0.00028051
SmLNCA133760-IBu	-0.041699	2.55441	3.16403e-06	0.00028051
Smp_201030.1	-0.0170795	8.34718	3.26525e-06	0.000287652
Smp_326530.1	-0.0326926	6.37825	3.3965e-06	0.000297332
Smp_041460.1	0.0232218	7.27073	3.48022e-06	0.000302757
Smp_134390.1	0.0197891	6.02249	3.53607e-06	0.000305706
Smp_041430.1	-0.0147396	8.18691	3.61187e-06	0.000309258
Smp_244960.1	0.0491466	4.8673	3.62379e-06	0.000309258
Smp_119110.1	0.021101	6.30988	3.64381e-06	0.000309258
Smp_049150.1	-0.0224473	8.68184	3.72055e-06	0.000313856
Smp_098550.1	-0.01791	5.02188	3.76548e-06	0.000315563
Smp_242540.1	-0.0294815	5.12625	3.80698e-06	0.000315563
Smp_005260.1	-0.0194314	6.29797	3.80879e-06	0.000315563
Smp_213500.1	-0.0123359	5.82163	3.95026e-06	0.000321408
Smp_154080.1	-0.023706	4.59218	3.96368e-06	0.000321408
Smp_317460.1	-0.0190215	7.79286	3.98539e-06	0.000321408
Smp_307020.1	-0.0234041	11.7128	4.00088e-06	0.000321408
Smp_134080.2	-0.019192	6.60756	4.00664e-06	0.000321408
SmLNCA146832-IBu	-0.123172	4.19637	4.03716e-06	0.000321408
Smp_246770.1	-0.063557	7.33102	4.04098e-06	0.000321408
Smp_039080.2	-0.0142805	5.31526	4.09891e-06	0.000324163
SmLINC176416-IBu	-0.132429	0.675876	4.12793e-06	0.000324614
Smp_241440.1	-0.0505451	5.41843	4.18754e-06	0.000325339
Smp_342560.1	-0.0687893	5.0418	4.20268e-06	0.000325339
Smp_346180.1	0.0163668	4.02463	4.23922e-06	0.000325339
Smp_122280.1	-0.0303703	4.19326	4.24762e-06	0.000325339
Smp_012810.1	-0.0185924	5.96041	4.25402e-06	0.000325339
Smp_166280.1	-0.0248406	3.90797	4.60307e-06	0.00035011
SmLINC114092-IBu	-0.0603014	4.36714	4.69344e-06	0.000355044
Smp_303590.2	-0.0137036	4.9596	4.81451e-06	0.000360929
Smp_327170.1	-0.0664066	4.29494	4.82311e-06	0.000360929
Smp_135560.1	-0.0328027	9.87082	5.01021e-06	0.000372926
Smp_194750.1	-0.0465122	4.80973	5.08149e-06	0.000375119
Smp_326580.2	-0.0675056	4.1086	5.09433e-06	0.000375119
Smp_129310.2	0.0223863	6.2774	5.12053e-06	0.000375119
Smp_019750.1	-0.0103352	7.8909	5.14855e-06	0.000375197
Smp_172150.1	-0.0450682	4.35376	5.26258e-06	0.00038151
Smp_093450.1	-0.0128592	6.21058	5.41802e-06	0.000390743
Smp_196950.1	-0.0810435	5.47947	5.44901e-06	0.000390952
Smp_307450.3	0.0645101	9.98108	5.67609e-06	0.000403089
Smp_153930.1	-0.029852	4.96103	5.71785e-06	0.000403994
Smp_000660.1	-0.0190813	10.0132	5.83848e-06	0.000409709
Smp_083770.1	-0.0323923	5.79305	5.86189e-06	0.000409709
Smp_332640.1	-0.0823787	5.14507	5.88705e-06	0.000409709
Smp_329570.1	0.0423568	1.6999	5.95414e-06	0.000412317
SmLINC108538-IBu	0.0321615	1.27588	6.08715e-06	0.000418816
Smp_086860.1	-0.0273418	5.75178	6.10817e-06	0.000418816
Smp_347220.1	-0.0393727	2.25031	6.16173e-06	0.000420417
Smp_194870.1	-0.0248293	4.77699	6.25849e-06	0.000423092
Smp_326550.1	-0.0403202	8.58994	6.26172e-06	0.000423092
Smp_333840.1	0.0375822	4.23307	6.31716e-06	0.000423838
Smp_034500.1	0.0381598	5.448	6.33366e-06	0.000423838
Smp_137890.1	-0.0465435	4.05746	6.52439e-06	0.000434208
Smp_102430.1	-0.0304244	4.17002	6.56587e-06	0.000434208
SmLINC121232-IBu	-0.0620561	2.38039	6.58221e-06	0.000434208
Smp_329670.1	-0.0371717	3.10216	6.68735e-06	0.000435932
Smp_074000.1	-0.0130443	11.3946	6.69701e-06	0.000435932
Smp_047370.1	-0.0127398	8.91316	6.70231e-06	0.000435932
Smp_097620.1	-0.0115506	5.93307	6.76593e-06	0.000438023
Smp_157950.1	-0.0149334	5.0994	6.85418e-06	0.000441682
Smp_002880.1	-0.0120634	9.14147	6.94094e-06	0.000445212
Smp_026560.2	-0.0178468	8.41103	7.00807e-06	0.000447455
Smp_046630.1	0.0143018	9.38176	7.10884e-06	0.000449529
Smp_043110.1	-0.0130767	6.90858	7.11743e-06	0.000449529
Smp_128920.1	0.017035	5.70207	7.13744e-06	0.000449529
Smp_247220.1	0.0221263	4.44917	7.29899e-06	0.000457625
Smp_204750.1	0.0145666	6.39313	7.33173e-06	0.000457625
Smp_343700.1	0.0201681	4.17244	7.37173e-06	0.000458067
Smp_130780.1	-0.0580014	2.38701	7.40499e-06	0.000458089
Smp_160360.1	-0.0464774	5.86845	7.45251e-06	0.000458989
Smp_302830.1	-0.033142	6.47461	7.72072e-06	0.000473413
Smp_341010.1	-0.0120332	7.21919	7.85309e-06	0.000479215
Smp_143970.1	-0.039123	3.95356	7.88421e-06	0.000479215
Smp_340130.2	-0.0235173	8.99399	8.03894e-06	0.000486495
Smp_320670.1	-0.0136397	5.34429	8.31716e-06	0.000498625
Smp_158520.2	-0.027739	7.04529	8.32405e-06	0.000498625
SmLINC126172-IBu	0.0549719	0.251545	8.34776e-06	0.000498625
Smp_341030.1	0.012953	5.18735	8.38267e-06	0.000498625
Smp_163050.1	-0.0164398	5.1333	8.59118e-06	0.000507511
Smp_147680.1	-0.0240212	7.83511	8.60496e-06	0.000507511
SmLNCA133759-IBu	-0.0847583	0.180216	8.65076e-06	0.000508059
Smp_179320.1	-0.0286818	5.3586	8.87788e-06	0.000519207
Smp_170340.1	-0.0222379	7.63432	9.11749e-06	0.000530989
SmLINC104833-IBu	0.044554	1.60532	9.38396e-06	0.000544231
Smp_148390.1	-0.0422532	5.91351	9.48793e-06	0.000547977
Smp_122900.1	0.0167366	7.02242	9.5483e-06	0.000549185
Smp_093720.1	-0.0338531	4.65596	9.70227e-06	0.000555745
Smp_246030.1	-0.0359875	5.77892	9.8656e-06	0.000562784
SmLNCA121770-IBu	-0.109173	-0.149732	9.98666e-06	0.000567364
Smp_161790.4	-0.0313085	4.07492	1.00613e-05	0.000569279
Smp_316480.1	-0.0990772	-0.0960536	1.0158e-05	0.000570335
Smp_307450.2	0.0476825	7.97135	1.01619e-05	0.000570335
Smp_337730.1	0.0744421	8.48468	1.02049e-05	0.000570449
Smp_127200.1	-0.0159389	6.18135	1.03593e-05	0.000576764
Smp_336900.1	-0.0498315	6.15168	1.04055e-05	0.000577027
Smp_174870.1	0.018627	5.47993	1.04886e-05	0.000579328
Smp_056200.1	-0.00959525	6.89398	1.06797e-05	0.000587554
Smp_039000.1	-0.0100758	7.49068	1.07728e-05	0.000590342
SmLINC138031-IBu	-0.108566	0.202982	1.08331e-05	0.000591318
SmLINC130789-IBu	-0.0899689	0.605044	1.092e-05	0.000593734
Smp_148590.1	-0.0211418	3.7372	1.10766e-05	0.000599675
Smp_153660.1	-0.0187848	4.29063	1.11155e-05	0.000599675
Smp_123830.1	-0.0356311	8.94651	1.11796e-05	0.000600809
Smp_144600.1	0.0226523	6.60364	1.13085e-05	0.000604813
Smp_139080.2	-0.0163054	6.06342	1.13516e-05	0.000604813
Smp_197370.1	-0.0314276	9.76103	1.13845e-05	0.000604813
Smp_079220.1	-0.012323	8.89933	1.18035e-05	0.000622322
SmLNCA158527-IBu	-0.0464	2.2511	1.19061e-05	0.00062536
Smp_154500.1	-0.020135	4.70374	1.21238e-05	0.000634405
Smp_029500.1	-0.0190639	8.57535	1.25071e-05	0.000652009
Smp_201950.1	0.0507956	2.99977	1.2703e-05	0.00065975
Smp_334160.1	-0.0191402	4.92887	1.28037e-05	0.000660446
Smp_128230.1	0.0142706	7.79211	1.28113e-05	0.000660446
Smp_053130.1	-0.0126466	9.4176	1.28916e-05	0.000662133
Smp_135840.1	-0.0152568	8.26014	1.30263e-05	0.000666594
Smp_341900.2	-0.0228369	6.69447	1.30765e-05	0.000666711
Smp_340910.1	-0.0106577	8.09446	1.32723e-05	0.000674224
Smp_087580.1	0.0096388	8.084	1.33949e-05	0.000677979
Smp_333070.1	0.0129408	4.46071	1.35549e-05	0.000682816
Smp_047610.1	-0.0246363	3.30955	1.35886e-05	0.000682816
Smp_020540.1	-0.0141845	5.60399	1.37322e-05	0.000687549
Smp_320320.1	-0.0397126	7.25313	1.39073e-05	0.000693819
Smp_016870.2	-0.0278922	3.95965	1.40852e-05	0.000699392
Smp_025830.1	-0.0197361	8.06569	1.41568e-05	0.000699392
Smp_063090.1	-0.0115644	7.72483	1.41786e-05	0.000699392
Smp_010710.1	-0.0124514	7.33304	1.422e-05	0.000699392
Smp_175420.1	-0.0147136	7.85659	1.43765e-05	0.000704602
Smp_340120.1	-0.0177998	6.76903	1.47185e-05	0.000718832
Smp_316340.4	0.0108815	6.72332	1.47826e-05	0.000719439
Smp_245030.1	-0.0145879	6.28604	1.50462e-05	0.000729714
Smp_046090.1	-0.0120347	8.91448	1.51368e-05	0.000731558
Smp_344060.1	-0.0128694	6.67663	1.5328e-05	0.000738234
Smp_158600.1	-0.013526	8.38922	1.55282e-05	0.000745302
Smp_337860.3	-0.0155451	5.28928	1.58198e-05	0.000756685
Smp_054840.1	-0.01474	5.86109	1.63109e-05	0.000771305
Smp_157670.1	-0.0230368	5.09119	1.63968e-05	0.000771305
Smp_306840.1	-0.0407228	4.50645	1.6404e-05	0.000771305
Smp_041540.1	-0.0200224	7.22414	1.64548e-05	0.000771305
Smp_000880.1	-0.0130762	7.95887	1.64868e-05	0.000771305
Smp_040190.1	0.0161714	8.22901	1.65133e-05	0.000771305
Smp_266790.1	0.0137063	6.0359	1.65829e-05	0.000771964
Smp_131050.1	-0.0255181	5.35448	1.67237e-05	0.000773515
Smp_333730.1	0.0201064	5.4103	1.67274e-05	0.000773515
Smp_132670.1	-0.0197564	11.3255	1.68074e-05	0.000774464
SmLINC133452-IBu	0.015536	3.74727	1.69373e-05	0.000774464
Smp_134510.1	-0.0124674	6.80624	1.69738e-05	0.000774464
SmLINC122979-IBu	0.0568827	1.12734	1.70218e-05	0.000774464
Smp_081190.1	0.0168978	6.58943	1.70261e-05	0.000774464
Smp_136590.1	-0.0108842	6.22993	1.73133e-05	0.000784965
Smp_246840.1	-0.0126763	8.55037	1.75118e-05	0.000788017
Smp_076400.1	-0.0206161	5.28766	1.75412e-05	0.000788017
Smp_136150.1	-0.0480372	5.68673	1.75505e-05	0.000788017
Smp_319790.1	0.0154955	5.01575	1.84677e-05	0.000823784
Smp_034120.2	0.0213552	5.16212	1.85039e-05	0.000823784
Smp_129410.1	-0.0306412	3.86627	1.85246e-05	0.000823784
Smp_335730.1	-0.0231814	4.21144	1.85851e-05	0.000823841
Smp_143490.1	-0.0203609	5.3126	1.87534e-05	0.00082866
Smp_341620.1	-0.0131611	8.65142	1.88263e-05	0.000829251
Smp_076660.1	-0.0135886	6.95582	1.93148e-05	0.000847799
Smp_337380.1	-0.0256243	5.10696	1.93692e-05	0.000847799
Smp_127820.2	-0.0137177	5.92519	2.00798e-05	0.000869129
Smp_312950.1	-0.0115362	7.89034	2.01063e-05	0.000869129
SmLNCA144025-IBu	-0.0580825	2.75547	2.0409e-05	0.000879483
SmLINC138076-IBu	0.0624722	0.1393	2.05641e-05	0.00088343
SmLINC112559-IBu	0.0249113	2.73343	2.06981e-05	0.000883806
Smp_311670.1	0.0743087	10.5729	2.06998e-05	0.000883806
Smp_175090.1	-0.0311826	7.68181	2.07893e-05	0.000884912
Smp_135860.1	-0.017592	5.46864	2.0923e-05	0.000885829
Smp_197860.1	-0.0241006	7.70879	2.09995e-05	0.000885829
Smp_149420.1	0.00906556	6.07014	2.11532e-05	0.00088952
Smp_341790.1	0.0319702	3.35707	2.13627e-05	0.000894551
Smp_324180.1	-0.0207657	4.29732	2.14558e-05	0.000894551
Smp_212710.2	-0.0180455	8.5013	2.14656e-05	0.000894551
Smp_140020.1	0.0185699	5.33615	2.16756e-05	0.000900606
Smp_343610.1	0.0109793	7.14204	2.18395e-05	0.000903476
Smp_170320.1	-0.0237146	3.24457	2.19066e-05	0.000903476
Smp_181270.2	0.0124672	4.53569	2.19394e-05	0.000903476
Smp_304210.1	0.0292829	0.937399	2.21043e-05	0.000905394
Smp_159790.2	-0.123064	2.52553	2.2129e-05	0.000905394
Smp_148800.1	-0.0121477	7.67192	2.21812e-05	0.000905394
Smp_180790.1	-0.014663	5.31635	2.23028e-05	0.00090633
Smp_038870.1	-0.0121844	7.10296	2.24728e-05	0.00090633
SmLINC132029-IBu	-0.0568089	2.26209	2.24775e-05	0.00090633
Smp_157670.2	-0.0263697	6.49865	2.25297e-05	0.00090633
Smp_344230.1	0.0192979	2.94827	2.29059e-05	0.000914209
Smp_176110.1	0.0221975	6.36391	2.29393e-05	0.000914209
SmLINC110492-IBu	0.028499	2.62024	2.2979e-05	0.000914209
Smp_246040.1	-0.0325495	6.85692	2.29882e-05	0.000914209
Smp_337740.1	-0.0325672	1.98765	2.33713e-05	0.000920573
Smp_335430.1	0.0799096	-0.415084	2.34128e-05	0.000920573
Smp_335440.1	0.0799096	-0.415084	2.34128e-05	0.000920573
Smp_335450.1	0.0799096	-0.415084	2.34128e-05	0.000920573
Smp_167830.1	0.0474019	3.81032	2.35623e-05	0.000923841
Smp_018170.1	0.0194133	5.20554	2.36464e-05	0.000924536
Smp_307950.2	-0.0143569	5.48406	2.38062e-05	0.000925796
Smp_153520.1	-0.0150278	4.4299	2.43597e-05	0.000940885
Smp_065150.1	-0.0173877	4.60686	2.44026e-05	0.000940885
SmLNCA141049-IBu	-0.108907	0.236758	2.4522e-05	0.000941251
Smp_054360.2	-0.00988933	7.49915	2.45473e-05	0.000941251
Smp_329920.1	-0.0185176	3.14046	2.47465e-05	0.000946283
Smp_146110.1	-0.0118525	6.06053	2.49744e-05	0.000952381
Smp_050280.1	-0.0134133	8.08361	2.53064e-05	0.000962406
Smp_335560.1	-0.0215422	4.54457	2.55858e-05	0.000970378
Smp_128610.1	-0.00932735	7.91599	2.59477e-05	0.000981428
Smp_170010.1	0.0187991	3.71373	2.60377e-05	0.000982164
Smp_001410.1	-0.0141279	7.67542	2.65564e-05	0.000999021
Smp_123000.1	0.0120689	7.3536	2.67381e-05	0.00100315
Smp_141610.1	0.0123056	11.7263	2.71433e-05	0.00101561
Smp_005160.5	0.0191735	5.25489	2.72569e-05	0.00101713
SmLINC116019-IBu	-0.0543749	2.53852	2.7929e-05	0.00103942
Smp_155560.1	0.0100796	6.69589	2.83995e-05	0.00105411
Smp_031710.1	-0.010757	7.19482	2.84935e-05	0.00105479
SmLNCA144348-IBu	-0.109761	0.566116	2.91811e-05	0.00107738
SmLNCS143325-IBu	0.0213855	3.82721	2.97041e-05	0.00109379
Smp_171090.1	-0.013249	5.15433	3.04487e-05	0.0011153
Smp_343060.1	0.0757087	1.03059	3.06526e-05	0.00111983
Smp_114430.2	-0.0224486	3.60458	3.07928e-05	0.001122
Smp_245170.1	0.0167197	3.0939	3.10981e-05	0.00113017
Smp_007670.1	-0.0267138	5.88157	3.16946e-05	0.00114325
Smp_204260.1	-0.0203152	4.15456	3.17045e-05	0.00114325
Smp_333780.2	-0.0113683	5.16197	3.24808e-05	0.00116775
Smp_344200.1	-0.010193	5.80143	3.25517e-05	0.00116775
Smp_152840.1	-0.0134919	5.4025	3.34143e-05	0.00119561
Smp_029970.1	-0.0344615	4.72421	3.35336e-05	0.00119681
Smp_049140.1	-0.0152781	4.83923	3.39051e-05	0.00120629
Smp_247920.2	0.0209231	6.6102	3.40426e-05	0.00120629
Smp_008580.1	-0.0117574	6.7808	3.40594e-05	0.00120629
Smp_068280.1	-0.0243187	8.11377	3.42954e-05	0.00121157
SmLNCS176110-IBu	-0.0439222	0.514239	3.45271e-05	0.00121667
Smp_300560.1	0.0169916	3.39631	3.46676e-05	0.00121853
Smp_106010.1	-0.0236969	3.83436	3.53487e-05	0.00123311
Smp_212310.1	-0.0108735	7.1385	3.54799e-05	0.00123311
Smp_141460.1	-0.0334085	2.91665	3.55248e-05	0.00123311
Smp_199050.1	0.0184334	7.05304	3.55252e-05	0.00123311
Smp_120360.1	-0.011377	5.98165	3.58606e-05	0.00123863
Smp_144840.1	-0.0107077	7.22315	3.58622e-05	0.00123863
Smp_123630.1	-0.0133982	5.78211	3.66819e-05	0.0012638
Smp_049330.1	-0.0120043	7.2338	3.71776e-05	0.00127694
Smp_196840.1	-0.0293641	9.41583	3.72469e-05	0.00127694
Smp_000950.1	-0.0690944	4.25317	3.73427e-05	0.00127698
Smp_343420.1	-0.0371303	1.84668	3.74313e-05	0.00127698
Smp_033670.1	-0.00755443	7.81512	3.80059e-05	0.00129341
Smp_242240.1	-0.0234742	7.39914	3.87367e-05	0.0013135
Smp_244750.1	-0.0268266	7.27077	3.8785e-05	0.0013135
Smp_154390.1	-0.0394341	2.92829	3.89794e-05	0.00131626
Smp_045760.1	-0.0109003	5.84866	3.90557e-05	0.00131626
Smp_345770.1	0.0151175	4.58938	3.92921e-05	0.00132103
Smp_163570.1	-0.0314109	8.45086	3.94975e-05	0.00132474
Smp_151490.1	-0.0180744	6.17621	3.96201e-05	0.00132539
Smp_128350.2	0.0201652	4.1082	3.97073e-05	0.00132539
Smp_024180.3	-0.0225468	7.37004	4.03618e-05	0.00134047
SmLNCS173610-IBu	0.120201	0.0138292	4.06372e-05	0.00134047
Smp_334210.1	0.0106077	4.54869	4.06795e-05	0.00134047
Smp_343810.1	-0.0216564	3.74515	4.06825e-05	0.00134047
Smp_176010.1	-0.020593	3.14069	4.09428e-05	0.00134406
Smp_009830.1	-0.0123267	7.1002	4.12192e-05	0.00134995
Smp_018990.1	-0.0128232	8.49732	4.15392e-05	0.00135406
Smp_246430.3	-0.0378719	3.69779	4.16415e-05	0.00135422
Smp_098960.1	-0.0119585	9.19927	4.24996e-05	0.00137735
SmLINC159472-IBu	0.0305393	4.28675	4.25504e-05	0.00137735
SmLNCA154179-IBu	-0.0403814	2.86212	4.33016e-05	0.00139518
Smp_210800.1	0.0669846	3.71085	4.4064e-05	0.00141646
SmLINC142502-IBu	-0.190115	2.1574	4.48654e-05	0.0014389
Smp_164040.1	-0.0233188	3.61287	4.58898e-05	0.00146679
Smp_318200.1	-0.0446115	2.16474	4.5946e-05	0.00146679
Smp_144010.1	-0.0104897	7.6181	4.7007e-05	0.00149723
Smp_131460.1	-0.0102586	6.96819	4.73331e-05	0.00150418
Smp_342940.1	0.034311	2.61291	4.79346e-05	0.00151982
SmLINC135720-IBu	-0.0335223	2.60963	4.91547e-05	0.00155496
Smp_212190.2	-0.0220888	3.96836	4.93021e-05	0.00155609
Smp_341510.1	0.0094819	6.74786	4.95933e-05	0.00156174
Smp_081900.1	0.0294074	8.1554	4.9823e-05	0.00156543
Smp_051640.2	0.0119479	4.98687	5.00039e-05	0.00156758
SmLINC132033-IBu	-0.0614338	2.89024	5.0231e-05	0.00157116
Smp_074700.2	-0.0150772	7.18156	5.04142e-05	0.00157335
Smp_194800.2	0.0129692	5.8272	5.14126e-05	0.00160092
Smp_137210.1	0.00936593	6.72721	5.2613e-05	0.00162483
Smp_099320.1	-0.0120791	6.3526	5.26473e-05	0.00162483
Smp_089640.1	-0.00833629	8.00547	5.32482e-05	0.00162981
Smp_247080.1	0.0770716	3.80071	5.3292e-05	0.00162981
Smp_336100.1	-0.0206071	5.8675	5.33908e-05	0.00162981
Smp_310040.1	-0.0316425	4.46763	5.33943e-05	0.00162981
Smp_157310.1	-0.0233949	4.29387	5.37193e-05	0.00163615
Smp_310950.1	-0.0110406	5.60283	5.42083e-05	0.00164743
Smp_194770.1	-0.0120942	8.53969	5.4711e-05	0.00165548
SmLINC157902-IBu	-0.108476	0.40771	5.56611e-05	0.00168058
Smp_153790.1	-0.0107431	8.2204	5.6714e-05	0.00170044
Smp_153790.2	-0.0107431	8.2204	5.6714e-05	0.00170044
SmLINC118400-IBu	-0.0298146	2.86967	5.67674e-05	0.00170044
Smp_032500.1	-0.0162829	5.32123	5.68076e-05	0.00170044
Smp_124380.1	0.0311441	0.596514	5.7142e-05	0.00170372
Smp_344210.1	-0.0204405	3.02517	5.71618e-05	0.00170372
Smp_201600.1	-0.0151062	4.38668	5.74771e-05	0.00170945
Smp_244610.1	0.016119	4.40442	5.79436e-05	0.00171965
Smp_128190.1	-0.0211132	5.15171	5.87067e-05	0.00173859
Smp_309500.1	-0.0306661	2.44608	5.89243e-05	0.00174133
Smp_024390.1	-0.0156574	7.39022	5.9179e-05	0.00174216
Smp_082570.1	-0.00824877	7.1827	5.92027e-05	0.00174216
Smp_315900.1	-0.0379479	6.97659	5.97203e-05	0.00174861
Smp_212940.1	-0.0159427	5.9701	5.97374e-05	0.00174861
Smp_018870.1	-0.0311594	5.4798	5.97986e-05	0.00174861
Smp_312150.1	0.00889903	6.87745	6.0104e-05	0.00175018
Smp_144590.2	0.0123988	5.39723	6.05037e-05	0.00175814
Smp_080100.1	-0.0100587	7.89947	6.08775e-05	0.00176327
Smp_202400.1	0.0187855	5.56481	6.10119e-05	0.00176327
Smp_152710.1	-0.0153521	8.24086	6.10602e-05	0.00176327
Smp_083800.1	-0.019607	5.22883	6.14116e-05	0.00176975
Smp_316490.1	0.0248208	5.68397	6.18536e-05	0.0017788
Smp_049890.1	0.00870452	4.96832	6.22544e-05	0.00178664
Smp_059780.1	-0.0130476	7.26269	6.26776e-05	0.00179508
Smp_028210.2	0.0198084	3.13323	6.29128e-05	0.00179812
Smp_169380.1	-0.0305491	2.59947	6.30772e-05	0.00179888
Smp_147470.1	0.0200568	7.67376	6.3198e-05	0.00179888
Smp_138030.1	0.0118086	7.35744	6.33654e-05	0.00179996
Smp_157560.1	0.0102008	5.04339	6.35255e-05	0.00180084
Smp_060570.1	-0.0119085	6.26855	6.40426e-05	0.00181063
Smp_004600.1	-0.00843898	8.40435	6.44122e-05	0.00181063
Smp_057060.1	-0.0156344	6.16286	6.44587e-05	0.00181063
Smp_346170.3	-0.0636312	3.2601	6.44897e-05	0.00181063
Smp_056440.1	-0.00846172	7.52464	6.45213e-05	0.00181063
Smp_086530.1	-0.0354381	9.83492	6.49636e-05	0.00181305
Smp_071540.1	-0.0282802	3.96761	6.49789e-05	0.00181305
Smp_101450.1	-0.0114888	8.85704	6.49984e-05	0.00181305
Smp_143980.1	0.00816857	6.18905	6.54305e-05	0.00182145
Smp_123020.1	0.0110428	5.77104	6.5836e-05	0.001823
Smp_322330.1	0.0205558	1.76521	6.58599e-05	0.001823
Smp_143130.1	-0.0145379	7.23952	6.60069e-05	0.001823
Smp_124460.1	-0.00956593	7.22928	6.60728e-05	0.001823
SmLINC104901-IBu	0.0326042	0.115686	6.71583e-05	0.00184738
Smp_132390.1	-0.0161889	4.72484	6.78219e-05	0.00185662
Smp_085110.1	-0.0113793	8.37229	6.80163e-05	0.00185662
Smp_136710.2	-0.0280921	8.07828	6.81216e-05	0.00185662
Smp_072950.1	-0.00887519	7.32205	6.82091e-05	0.00185662
Smp_067260.1	-0.019557	3.81851	6.83834e-05	0.00185662
Smp_331910.1	-0.0215975	5.55447	6.84276e-05	0.00185662
Smp_095360.2	-0.0133178	9.07092	6.85906e-05	0.00185742
Smp_144570.1	-0.00920491	5.50996	6.88036e-05	0.00185957
Smp_023360.1	-0.0110449	7.64749	6.91239e-05	0.00186336
Smp_204010.1	0.019471	4.98351	6.92118e-05	0.00186336
SmLNCA177347-IBu	0.0228513	3.23991	6.97294e-05	0.00187289
Smp_302340.1	0.0807774	0.762299	7.15428e-05	0.00191501
Smp_126480.1	-0.0241962	8.51638	7.17906e-05	0.00191795
Smp_344130.1	-0.0182972	3.23595	7.27154e-05	0.00193422
Smp_327360.1	-0.0140766	5.19653	7.28162e-05	0.00193422
Smp_164950.1	-0.0202902	4.58881	7.29983e-05	0.00193536
Smp_247600.1	-0.023709	3.8106	7.34819e-05	0.00194448
Smp_203190.1	-0.0183605	5.40907	7.38324e-05	0.00195004
Smp_095520.1	-0.0247217	8.4521	7.41136e-05	0.00195286
Smp_046500.2	-0.0103553	6.79208	7.42197e-05	0.00195286
Smp_013200.1	-0.0136007	9.59536	7.437e-05	0.00195313
Smp_332480.3	-0.0269598	3.68116	7.46216e-05	0.00195604
Smp_073620.1	-0.00818509	7.38026	7.4828e-05	0.00195777
Smp_001780.3	0.0198464	4.50137	7.53858e-05	0.00196866
Smp_105220.1	0.0220145	6.90039	7.55327e-05	0.0019688
Smp_022450.1	0.0332408	5.86709	7.61677e-05	0.00197681
Smp_160160.1	-0.0273487	5.54914	7.63582e-05	0.00197681
SmLINC147754-IBu	0.034378	2.7	7.64379e-05	0.00197681
Smp_247150.1	-0.00901363	5.9134	7.65502e-05	0.00197681
Smp_247150.2	-0.00901363	5.9134	7.65502e-05	0.00197681
Smp_067000.2	0.0219256	6.86762	7.67002e-05	0.00197702
Smp_006860.3	-0.0187402	7.9885	7.7018e-05	0.00198154
SmLINC124764-IBu	0.0371021	0.857295	7.75602e-05	0.0019899
Smp_210930.1	-0.00797291	6.89776	7.76546e-05	0.0019899
Smp_000100.6	-0.0273731	1.87022	7.78718e-05	0.0019899
SmLNCA111136-IBu	0.060933	0.239114	7.79493e-05	0.0019899
SmLINC106006-IBu	0.0429384	-0.401236	7.80578e-05	0.0019899
Smp_345280.1	0.0124402	5.04444	7.98982e-05	0.0020331
Smp_035190.3	0.0101362	5.67144	8.00871e-05	0.00203418
SmLINC174576-IBu	-0.0677022	0.085262	8.05437e-05	0.002039
Smp_042590.1	-0.0086432	7.20371	8.10172e-05	0.0020466
Smp_267140.1	-0.00999343	6.49779	8.21062e-05	0.00206661
Smp_343330.1	0.0153334	4.46277	8.265e-05	0.00207654
Smp_307460.1	-0.0190233	7.23004	8.29758e-05	0.00208097
Smp_324450.1	0.0309294	3.46082	8.32517e-05	0.00208292
Smp_340600.1	-0.0095012	7.1563	8.33528e-05	0.00208292
Smp_078230.1	0.0140961	5.39761	8.35826e-05	0.00208492
Smp_310180.1	0.0171212	7.72654	8.39947e-05	0.00209145
Smp_311630.1	0.0419546	7.48741	8.58212e-05	0.00213312
Smp_080420.1	0.0161146	7.4161	8.62973e-05	0.00214113
Smp_333600.1	0.014471	5.29674	8.67081e-05	0.00214749
Smp_077390.1	-0.0144869	7.01226	8.86597e-05	0.00218961
Smp_143740.1	-0.0125511	4.60571	8.87233e-05	0.00218961
Smp_074140.1	0.0309851	9.54214	8.91626e-05	0.00219547
Smp_084900.1	-0.0133428	6.82171	8.94332e-05	0.00219547
SmLNCA127721-IBu	0.0283848	1.25388	8.94342e-05	0.00219547
Smp_037530.1	-0.00955415	6.2105	9.00652e-05	0.00220707
Smp_040020.1	-0.0256951	3.14547	9.03031e-05	0.00220901
Smp_141360.1	-0.0114938	6.39861	9.10934e-05	0.00222411
Smp_128480.1	-0.0236598	6.61215	9.12396e-05	0.00222411
Smp_099310.1	-0.0166046	6.18825	9.18011e-05	0.00223388
Smp_244430.1	-0.0244134	2.71582	9.20067e-05	0.00223489
SmLNCA106388-IBu	-0.0475304	3.06202	9.21636e-05	0.00223489
Smp_334180.1	0.0205401	3.1176	9.26015e-05	0.00223684
Smp_334510.1	0.0111579	7.93205	9.28655e-05	0.00223684
Smp_325680.1	-0.0330923	4.23083	9.28871e-05	0.00223684
Smp_138500.1	0.00975739	6.58151	9.46646e-05	0.00227571
Smp_041980.1	-0.0188788	8.07779	9.4978e-05	0.00227931
Smp_105040.1	-0.0129261	5.70066	9.54085e-05	0.0022857
SmLINC138220-IBu	0.0517385	2.24566	9.59461e-05	0.00228645
Smp_089430.1	-0.0136988	8.55806	9.60141e-05	0.00228645
Smp_043030.1	0.013311	9.48495	9.66116e-05	0.00229086
Smp_051360.1	-0.0132783	7.8973	9.7053e-05	0.00229742
Smp_204120.1	0.0204609	3.20665	9.75468e-05	0.00230402
Smp_138610.1	-0.0112441	4.74967	9.76631e-05	0.00230402
Smp_000480.2	-0.00940176	7.24957	9.84222e-05	0.00231357
Smp_010280.1	0.00926069	6.20412	9.86647e-05	0.00231357
Smp_157930.1	-0.0177816	5.49352	9.87038e-05	0.00231357
Smp_245870.1	-0.0141261	5.80528	9.87327e-05	0.00231357
Smp_147420.1	0.0323993	6.86332	9.9138e-05	0.00231916
Smp_161560.3	0.0163734	3.81657	9.95613e-05	0.00232516
Smp_179910.1	0.0192084	7.30907	0.000100171	0.00233547
Smp_247230.1	0.0144312	7.05002	0.000101096	0.00235309
Smp_056460.2	-0.0183019	3.7285	0.000101593	0.00236072
Smp_160760.2	0.0122304	6.48804	0.00010208	0.0023681
Smp_166820.1	-0.0183277	3.82347	0.000103236	0.00239091
Smp_045220.1	-0.0151376	9.69632	0.000104214	0.0024077
Smp_094250.1	-0.0197397	5.58457	0.000104307	0.0024077
Smp_159600.1	-0.023986	5.07537	0.000104599	0.00241046
Smp_058460.1	-0.00803981	7.37329	0.000104877	0.00241287
Smp_201060.1	-0.0240123	8.33226	0.000105578	0.00242498
Smp_340860.1	-0.0248601	6.99079	0.000105878	0.00242787
Smp_125650.2	0.0169823	2.83426	0.000106079	0.00242847
Smp_076740.1	-0.0139758	8.25117	0.000107135	0.00244863
Smp_042680.1	-0.0124772	7.73706	0.000107394	0.002449
Smp_065610.1	-0.0104421	10.679	0.000107504	0.002449
Smp_018250.2	-0.0287495	9.5037	0.000108346	0.00246417
Smp_129710.1	-0.0210815	5.24267	0.000109306	0.00247906
Smp_092150.1	0.0308626	2.2544	0.000110523	0.00249735
Smp_031730.1	-0.00921008	6.55879	0.000111018	0.00250446
Smp_244000.1	-0.0170582	4.00029	0.000112628	0.00253048
SmLINC114091-IBu	-0.0392763	3.54247	0.000112716	0.00253048
Smp_175950.1	-0.0106712	5.14596	0.000113583	0.00254582
Smp_212940.2	-0.0153766	3.94015	0.000113798	0.00254655
Smp_061100.1	-0.0190129	4.8046	0.000114216	0.0025518
Smp_136910.1	-0.00954728	6.14459	0.000114479	0.00255358
Smp_244020.1	0.0114886	6.47445	0.000115944	0.00258211
Smp_164590.1	-0.0332131	8.72967	0.000116317	0.002585
Smp_141250.1	0.0163865	2.65042	0.00011692	0.00258836
Smp_341560.1	-0.0163913	3.78721	0.000117482	0.00259365
Smp_027430.2	-0.0232006	4.90617	0.00011758	0.00259365
Smp_000810.1	-0.00959207	5.97949	0.000118302	0.00260244
Smp_200190.1	-0.015282	10.0807	0.000118352	0.00260244
Smp_196160.1	-0.00748851	6.79987	0.000118702	0.00260601
SmLINC154945-IBu	0.0568593	-0.519597	0.000120007	0.00263051
Smp_165080.1	-0.0096124	4.5234	0.000120839	0.00264458
Smp_126540.2	-0.0142807	5.28891	0.000122118	0.00266423
Smp_315740.2	-0.00880809	5.7462	0.000122565	0.00266423
Smp_332730.1	-0.0150525	8.0178	0.000122673	0.00266423
Smp_042700.1	-0.0144698	6.58176	0.000122803	0.00266423
Smp_212860.1	-0.007835	6.04054	0.000122885	0.00266423
Smp_163340.1	-0.0105391	4.81035	0.000124082	0.002686
Smp_341950.2	0.0262918	2.10762	0.000124603	0.00268761
Smp_124030.1	0.0124458	4.89435	0.000124659	0.00268761
Smp_002100.1	-0.0232894	7.55559	0.000124736	0.00268761
Smp_084540.4	0.0100103	5.92779	0.000125034	0.00268987
Smp_161080.2	0.0112972	6.7499	0.000126206	0.00271089
Smp_131680.1	0.00906512	5.46718	0.000128585	0.00274793
Smp_332940.1	-0.0146278	7.10133	0.000128806	0.00274793
Smp_301730.1	-0.0113275	6.08244	0.000129042	0.00274793
Smp_037540.1	-0.0107142	9.18412	0.000129163	0.00274793
Smp_316170.1	-0.0384318	1.55193	0.000129252	0.00274793
Smp_008660.1	0.0517874	9.02352	0.000129553	0.00274793
Smp_246400.1	-0.0195473	8.55687	0.000129624	0.00274793
Smp_300360.1	0.0236397	0.762459	0.000130416	0.00275875
Smp_145560.3	0.034426	1.68439	0.000132236	0.00278534
Smp_166340.1	0.0210801	7.9102	0.000132372	0.00278534
Smp_303950.1	0.0177012	6.28105	0.000132645	0.00278534
Smp_198890.1	0.0149394	3.71756	0.00013291	0.00278534
Smp_041450.1	-0.00905124	7.63941	0.000133033	0.00278534
Smp_139800.1	0.0113929	6.29112	0.000133074	0.00278534
Smp_012530.1	-0.0133172	6.13245	0.000133718	0.00279044
Smp_061230.1	-0.00840893	8.05726	0.000134786	0.00280852
Smp_136620.1	-0.0149598	4.27842	0.00013558	0.0028205
Smp_342420.1	0.0359698	5.98851	0.000135767	0.0028205
Smp_025010.1	-0.0074271	7.97987	0.000136204	0.00282537
Smp_322410.1	-0.00648724	7.39992	0.000136453	0.00282633
Smp_070710.1	-0.0108346	4.65829	0.000136697	0.00282716
Smp_135900.1	-0.0183081	4.04427	0.000137685	0.00284338
SmLINC137412-IBu	0.0217811	2.04187	0.000138815	0.00286248
Smp_155620.1	0.0155003	6.81869	0.000139088	0.00286386
SmLINC164678-IBu	0.0246415	3.30874	0.000139488	0.00286784
Smp_086220.1	-0.0143783	4.06408	0.000139862	0.0028713
Smp_333340.1	-0.0315526	2.14834	0.000140425	0.0028786
SmLINC005909-IBu	0.0451492	2.10661	0.000141598	0.00289838
Smp_341300.1	-0.00934538	7.56901	0.000143081	0.00292444
Smp_069770.1	-0.00740985	6.58584	0.000143707	0.00293293
SmLNCA112669-IBu	-0.0916935	-0.148815	0.000145213	0.00295499
Smp_140000.1	0.0127137	6.41435	0.000145705	0.00296069
Smp_315830.2	0.0333488	2.25116	0.000147987	0.00299831
Smp_074780.1	-0.015946	8.58738	0.000148386	0.00300161
Smp_032760.1	-0.0113248	8.56068	0.000148797	0.00300161
Smp_333000.1	-0.0294001	4.90557	0.000149436	0.00300346
Smp_044950.1	0.00861323	6.98788	0.000149439	0.00300346
Smp_340530.1	-0.0191413	4.09892	0.000149536	0.00300346
Smp_033040.1	-0.0114321	7.24215	0.000150704	0.00302255
Smp_343210.1	-0.0135196	7.43694	0.000151466	0.00302787
Smp_105020.1	-0.0168731	8.40082	0.000151724	0.00302787
Smp_123490.1	-0.0088543	5.55926	0.000151726	0.00302787
Smp_137910.1	0.0139417	4.80844	0.000151839	0.00302787
Smp_009230.1	0.0279295	8.45077	0.00015293	0.00304363
Smp_024850.1	-0.0111275	7.64379	0.000153286	0.00304363
Smp_024850.2	-0.0111275	7.64379	0.000153286	0.00304363
Smp_327240.1	-0.0174823	3.89941	0.000154408	0.00306154
Smp_146480.1	-0.0458225	3.01341	0.000154931	0.0030632
Smp_017280.1	-0.0103335	8.80367	0.000156383	0.00308744
Smp_331420.1	-0.0553211	-0.0488972	0.000156884	0.00308744
Smp_127160.1	-0.0119853	4.37685	0.000157193	0.00308744
Smp_089460.1	-0.0153789	8.14642	0.000160484	0.00314175
Smp_034680.1	-0.029146	2.27387	0.000161841	0.00316084
Smp_335980.1	0.0164532	3.64695	0.000162184	0.00316084
Smp_154910.1	-0.0177489	6.45117	0.000163508	0.00317859
Smp_342040.1	0.0305076	4.17946	0.000164451	0.00318476
Smp_026630.2	-0.00911539	6.28195	0.000164644	0.00318476
Smp_201130.1	-0.0219067	4.00537	0.000164719	0.00318476
Smp_129610.1	-0.0241518	3.79986	0.000164741	0.00318476
Smp_328620.2	0.0274842	0.985701	0.000165574	0.00319644
Smp_309510.1	-0.0267195	3.03883	0.000167074	0.00321646
Smp_340760.8	-0.0205058	8.02681	0.000168022	0.00323025
Smp_021730.1	-0.00671607	8.27726	0.000168679	0.0032384
Smp_067000.1	0.0137868	7.71642	0.000171096	0.00327127
Smp_043270.1	0.0417682	0.162791	0.000171536	0.00327518
Smp_032320.1	0.0145956	5.48798	0.000172101	0.00328147
Smp_155210.1	0.0111757	4.87342	0.000173067	0.0032945
Smp_012410.1	-0.00717793	6.58779	0.000173825	0.0032991
Smp_130520.3	-0.0142045	6.63987	0.000173974	0.0032991
SmLNCS126712-IBu	-0.0446473	2.04758	0.000174607	0.00330661
Smp_155290.4	-0.0329813	2.48348	0.000176314	0.00332491
Smp_181080.2	0.0158912	5.27335	0.000176492	0.00332491
Smp_341240.1	-0.01142	7.01997	0.000176529	0.00332491
Smp_170840.1	0.0454206	5.02451	0.000177758	0.00334354
Smp_194240.1	0.0114665	5.47952	0.000179143	0.00336051
Smp_048080.1	0.0182981	2.6375	0.000179512	0.00336289
Smp_035080.1	-0.0127169	5.15573	0.000180875	0.00338387
SmLINC118928-IBu	0.023397	3.53927	0.000182257	0.00340357
Smp_147840.1	0.00827185	7.35116	0.000183105	0.00340357
Smp_161790.1	-0.0169317	7.32542	0.000183306	0.00340357
Smp_305490.2	-0.0232453	7.45095	0.000183395	0.00340357
SmLINC146898-IBu	-0.0405271	2.29855	0.000184057	0.00341131
Smp_139540.1	0.0164867	5.4535	0.000184413	0.00341336
Smp_342350.1	-0.0140855	5.10647	0.000185248	0.00342426
Smp_300500.1	0.0142352	3.75924	0.000185753	0.00342905
Smp_341590.1	-0.00944385	8.93357	0.000189687	0.0034924
Smp_092490.1	-0.00848567	6.46367	0.00019092	0.00351046
Smp_024820.1	-0.0134254	7.55409	0.000195226	0.00357125
Smp_085540.1	-0.0254426	11.8679	0.000195252	0.00357125
Smp_313300.1	0.0531469	2.90708	0.00019626	0.00358497
Smp_089240.1	-0.0112567	8.21114	0.000196806	0.00359022
Smp_088270.1	0.0125443	6.69418	0.000198459	0.00360246
Smp_051810.1	-0.011192	5.91209	0.000198478	0.00360246
SmLNCA109971-IBu	0.0192008	3.29523	0.000199224	0.00360672
Smp_129050.2	0.0132384	6.47689	0.000199265	0.00360672
Smp_078750.1	-0.0101298	8.46067	0.000199665	0.00360926
Smp_176780.2	0.0157785	4.19056	0.00020022	0.0036146
Smp_149180.4	0.0181225	2.95434	0.000202204	0.00364569
Smp_042090.1	-0.0111336	9.03397	0.000204099	0.00367035
Smp_134550.1	0.0116388	6.39156	0.000204451	0.00367193
Smp_021920.1	-0.0208722	9.83607	0.000205498	0.00368599
Smp_304910.1	0.0109405	4.56715	0.000206315	0.00368754
Smp_097590.1	-0.00827509	6.48007	0.000206379	0.00368754
Smp_046060.1	0.0138885	9.07586	0.000207453	0.00369263
Smp_014290.2	-0.0078256	6.01799	0.000207725	0.00369263
SmLNCA138025-IBu	0.0397413	3.05493	0.00020842	0.00370025
Smp_196290.1	-0.0109394	7.12185	0.00020882	0.00370143
Smp_020770.1	-0.0123218	7.53938	0.000209018	0.00370143
Smp_194610.1	-0.0177964	4.42904	0.000209635	0.00370763
Smp_320360.1	-0.0502809	1.45454	0.000213134	0.00375077
Smp_011010.1	-0.0122641	5.32916	0.000214209	0.00376422
Smp_008360.1	0.0197241	6.99243	0.00021641	0.00378895
Smp_165170.1	0.00900401	6.08304	0.000216762	0.00379034
Smp_040790.1	-0.0123674	8.81385	0.000217886	0.00379589
Smp_334450.1	-0.03015	3.83197	0.000218094	0.00379589
Smp_071960.1	-0.011255	5.85279	0.00021817	0.00379589
Smp_346740.1	0.0201835	2.65469	0.000218821	0.00380247
SmLINC105115-IBu	0.0497631	5.4198	0.000221006	0.00383426
Smp_125660.1	-0.00789646	6.29043	0.000221466	0.00383426
Smp_011220.1	0.0130803	5.23572	0.000221478	0.00383426
Smp_326760.1	-0.0368479	3.83127	0.000222169	0.00383568
Smp_309720.2	0.0189425	5.58647	0.000222387	0.00383568
Smp_001170.2	-0.00680339	8.08656	0.000222699	0.00383631
Smp_073140.1	-0.007559	6.44511	0.000224336	0.00385498
SmLINC109983-IBu	-0.0500433	2.78782	0.000225655	0.00387287
Smp_001100.1	-0.0303969	7.24747	0.000226835	0.00388833
Smp_133050.1	0.00831988	5.57595	0.000227134	0.00388867
Smp_333460.1	-0.0117681	5.05728	0.000228481	0.00390003
Smp_342020.2	0.0248381	4.91073	0.000230729	0.00393086
Smp_139720.1	-0.0179301	8.03555	0.000232577	0.00395267
SmLINC159037-IBu	0.0562596	4.4645	0.000233751	0.00396188
Smp_073880.1	-0.0122884	9.08594	0.000234272	0.00396188
Smp_140560.1	-0.0322613	5.4681	0.000234334	0.00396188
SmLNCA120917-IBu	0.0562818	-0.453602	0.000234542	0.00396188
Smp_024110.1	-0.00814813	10.7491	0.000235034	0.00396538
Smp_337090.2	-0.0136936	6.69813	0.000236901	0.00398867
Smp_142820.1	0.0356523	3.90422	0.000240035	0.00402768
Smp_200240.1	-0.0205388	7.0974	0.000240173	0.00402768
SmLNCA176148-IBu	-0.043687	1.18171	0.000240651	0.00402914
Smp_315730.1	0.00953588	7.21077	0.000240992	0.00402914
Smp_091240.1	-0.011395	8.60572	0.000241129	0.00402914
Smp_344820.3	-0.066244	7.63089	0.000241976	0.00403845
Smp_337040.1	-0.0111381	5.04065	0.000243064	0.00405175
Smp_335110.1	-0.0116146	5.64006	0.000244178	0.00406136
Smp_323570.1	-0.032008	4.56684	0.000244224	0.00406136
Smp_211040.1	-0.0108565	6.2352	0.000245648	0.00407754
Smp_074470.1	-0.0110871	8.72445	0.000246929	0.00407754
Smp_065190.1	-0.0110619	6.35459	0.000246955	0.00407754
Smp_008310.1	-0.00765848	7.9531	0.000248147	0.00408896
Smp_066760.1	0.011422	9.31818	0.000249119	0.00409868
Smp_017290.1	-0.0142533	5.60973	0.000250042	0.00410901
Smp_342720.1	-0.0239338	3.55881	0.000251006	0.00411999
Smp_267080.1	-0.0217238	6.61529	0.000253206	0.00414168
SmLINC140551-IBu	0.0283336	1.95193	0.000254553	0.0041586
Smp_171880.1	0.00655721	7.13626	0.000255864	0.00417388
Smp_075770.1	0.0148734	7.04058	0.000256088	0.00417388
Smp_346190.1	0.0114817	4.69697	0.000259885	0.00422303
Smp_346440.1	0.0107306	5.13785	0.000260317	0.00422303
Smp_011700.1	0.010865	6.14434	0.000270824	0.00436296
Smp_006750.2	-0.0101081	6.077	0.000271713	0.00436866
Smp_092950.1	0.00864897	6.39656	0.000271805	0.00436866
Smp_204380.1	0.0107313	6.32477	0.000272976	0.00438242
SmLINC119713-IBu	0.0684165	2.33754	0.000275212	0.00440814
Smp_079000.1	-0.00740765	7.32761	0.000277674	0.0044272
Smp_244370.1	0.0131142	4.10859	0.000279624	0.00444927
Smp_174510.1	-0.0213464	5.62618	0.000279698	0.00444927
Smp_080130.1	-0.0101281	5.38427	0.000280319	0.00445406
Smp_141310.1	0.0241777	1.75591	0.000282858	0.00448929
Smp_128790.1	0.00972818	6.82909	0.000285285	0.0045175
Smp_312610.1	-0.0418195	2.29037	0.000285923	0.00452246
Smp_344600.1	0.0101255	4.80701	0.000286915	0.00453034
Smp_003970.1	-0.0106487	7.74045	0.000287072	0.00453034
Smp_244340.2	0.0340063	2.93444	0.000288385	0.0045459
Smp_011560.1	-0.0140049	8.37273	0.000289321	0.0045555
Smp_334030.2	0.00825645	5.80581	0.000290168	0.00456367
Smp_176000.1	-0.0200127	4.02333	0.000291567	0.00458049
Smp_013470.1	-0.00818075	9.69981	0.000295286	0.00462327
Smp_017830.1	-0.0073935	7.96334	0.000297373	0.00464759
Smp_309590.2	0.011666	6.0002	0.000297507	0.00464759
Smp_343690.1	-0.0429709	3.51575	0.000298525	0.00465416
Smp_067480.1	0.026874	7.51827	0.000299265	0.00465416
Smp_050920.1	0.00985246	6.81388	0.000300068	0.00466144
Smp_000870.3	0.0126286	4.93166	0.000301151	0.00467305
Smp_103920.1	0.0105997	4.66938	0.000304292	0.00470605
Smp_054220.1	0.0127328	7.97876	0.000304699	0.00470711
Smp_179810.1	-0.0149476	10.0512	0.000305299	0.00471115
Smp_154970.1	-0.0162003	5.36636	0.000307329	0.00473722
Smp_169260.3	-0.032573	7.35435	0.000307966	0.0047418
Smp_125730.2	0.018284	5.75093	0.000308979	0.00475213
Smp_213900.1	-0.0164902	8.04896	0.000311343	0.00477794
Smp_019680.2	0.00719668	6.49423	0.000314461	0.00482047
Smp_058450.1	0.00835237	6.50148	0.000315928	0.00482701
Smp_093440.1	-0.0114552	8.88935	0.000316812	0.00483082
Smp_145370.1	0.0145584	7.54257	0.000316872	0.00483082
Smp_305490.6	-0.0374327	4.14747	0.000318803	0.00484489
Smp_132270.1	0.00963139	6.48195	0.000319894	0.00484489
Smp_059130.4	-0.0567353	3.74256	0.000320975	0.00484489
Smp_315420.1	0.0215964	9.20195	0.000321391	0.00484489
Smp_126020.1	-0.00674668	6.61506	0.000321558	0.00484489
SmLINC115064-IBu	-0.0381507	2.31156	0.0003252	0.00488818
Smp_143750.1	-0.0167356	4.97938	0.000325847	0.00489262
SmLINC156886-IBu	0.0216661	2.54313	0.000327017	0.00490038
Smp_326040.1	-0.0131318	6.21051	0.000330447	0.00493508
Smp_089200.1	-0.0213322	6.3207	0.000332514	0.00496063
SmLNCA173084-IBu	-0.0344012	2.31733	0.000333846	0.00496903
Smp_063420.1	-0.00845908	8.74684	0.000334443	0.00496903
Smp_013950.1	-0.0187708	6.16308	0.000334505	0.00496903
SmLINC112473-IBu	0.0270739	2.40019	0.000336006	0.00498162
Smp_163720.1	-0.0134992	8.67939	0.000336069	0.00498162
Smp_140430.3	0.0166002	3.48298	0.000338784	0.00500588
Smp_210370.1	-0.00927002	9.0248	0.000339768	0.0050151
Smp_333770.1	-0.00681488	6.78444	0.000340396	0.00501904
Smp_169930.1	-0.0180178	2.6695	0.000341033	0.00502311
Smp_245710.2	0.0206136	4.51884	0.000341509	0.00502481
Smp_347610.1	-0.0207787	7.54461	0.00034226	0.00503053
Smp_331730.1	0.0236096	0.904994	0.000345559	0.00505994
Smp_210980.1	0.00860256	5.48126	0.000345715	0.00505994
Smp_042770.1	-0.0127696	4.84424	0.000346547	0.0050668
Smp_007000.1	-0.0208186	2.62757	0.000350152	0.00510877
Smp_008470.1	0.0058872	6.9906	0.000351552	0.00511961
Smp_145930.1	0.0227396	3.47387	0.000351631	0.00511961
Smp_311640.1	0.0276507	5.2821	0.000352548	0.00512227
Smp_128060.1	0.0132097	2.80986	0.00035255	0.00512227
Smp_153700.1	-0.0187383	8.40481	0.000354549	0.00514596
Smp_104890.1	-0.0245777	2.90677	0.000355569	0.00514759
Smp_246620.2	0.0232924	7.1181	0.00035886	0.00516556
Smp_341580.1	-0.00682128	6.04513	0.000359014	0.00516556
Smp_053820.2	-0.00829737	9.05045	0.000360395	0.00516556
Smp_304370.2	0.00803773	7.04894	0.000360397	0.00516556
Smp_062790.1	-0.00768634	6.69292	0.000360665	0.00516556
Smp_124050.2	-0.0409382	7.33193	0.000361522	0.00517166
Smp_332970.1	-0.0164773	4.50492	0.000362229	0.00517645
Smp_340630.1	-0.00660793	10.4186	0.000362601	0.00517645
Smp_077030.1	-0.00749274	7.0647	0.000364282	0.00519512
Smp_342020.1	0.0270749	4.86271	0.000369322	0.00523863
Smp_094050.3	-0.010334	6.14798	0.000370208	0.00523863
SmLINC148988-IBu	0.0222329	3.38538	0.000370662	0.00523863
Smp_169410.1	-0.0184493	2.75834	0.00037072	0.00523863
Smp_047200.1	-0.00881689	9.61206	0.000372337	0.00525614
Smp_136460.2	0.128627	1.29193	0.000373026	0.00526053
Smp_079310.1	-0.00821311	8.53524	0.000374349	0.00526852
Smp_342840.1	0.0153224	3.94202	0.00037513	0.00527048
Smp_082940.1	-0.00881276	6.9367	0.000375246	0.00527048
Smp_133380.2	0.017556	3.1988	0.000376254	0.00527931
SmLINC166165-IBu	0.027541	-0.502819	0.000378091	0.00529974
Smp_105410.1	-0.0178209	7.66006	0.000382095	0.00533473
Smp_060750.1	0.0320433	0.424813	0.000382503	0.00533473
Smp_157670.3	-0.0169111	5.80727	0.000383883	0.00534327
Smp_203390.1	0.01942	5.57594	0.000385069	0.00535429
Smp_138160.1	-0.0107631	5.58853	0.000385624	0.00535429
Smp_051530.1	-0.0217275	2.45225	0.000388294	0.00537055
Smp_056260.1	-0.0212139	3.29605	0.000388544	0.00537055
Smp_003620.1	0.00672835	7.23122	0.000391339	0.00540382
Smp_006860.2	-0.0274018	5.5506	0.00039631	0.00545622
SmLINC101519-IBu	0.0414188	2.14199	0.000397673	0.00545879
Smp_029890.1	-0.00980849	7.85684	0.000403885	0.00552771
Smp_312440.1	-0.0169915	10.2454	0.000404374	0.00552896
Smp_313980.1	0.0144288	4.97691	0.000407325	0.00556385
Smp_070330.1	-0.0240146	4.71347	0.000408472	0.00557113
Smp_146250.1	0.00936603	7.95891	0.000408659	0.00557113
Smp_197540.1	-0.0144399	7.94015	0.000410314	0.00558436
Smp_320940.2	-0.0174345	5.24306	0.000410432	0.00558436
Smp_165150.1	-0.0235659	3.96605	0.000413964	0.00562692
Smp_196950.2	-0.0518885	5.00531	0.000415328	0.00563995
Smp_008070.1	-0.0130771	9.27169	0.000416191	0.00564616
Smp_132700.2	-0.024515	5.79617	0.000417198	0.00564648
Smp_119920.1	-0.0133705	8.33719	0.000417543	0.00564648
Smp_154610.1	-0.00999415	7.64269	0.000418348	0.00564648
Smp_344370.1	-0.0113825	6.25627	0.000420866	0.00566079
Smp_124430.1	-0.00765087	8.10034	0.00042093	0.00566079
SmLINC165217-IBu	0.0214009	3.06359	0.000423612	0.00569136
Smp_313210.1	-0.00881541	5.16128	0.000426601	0.00572599
Smp_135500.1	-0.0145123	5.54132	0.00043078	0.00576542
Smp_127500.3	0.0185179	4.42734	0.000431857	0.00577427
Smp_005880.1	-0.0214376	6.03315	0.00043405	0.00578138
Smp_160360.2	-0.036597	5.89355	0.000434938	0.00578766
Smp_171000.1	-0.0249339	2.09189	0.000437731	0.00581371
Smp_008660.2	0.0451383	10.2343	0.00043841	0.00581719
Smp_067480.2	0.036817	4.10097	0.00044077	0.00583398
Smp_316250.1	0.0550493	0.481618	0.000441431	0.00583398
Smp_245790.2	0.01259	5.49261	0.000441908	0.00583398
Smp_075330.1	-0.0267409	4.38935	0.000442964	0.00583398
Smp_087250.1	-0.0174043	7.9797	0.000442991	0.00583398
Smp_078690.1	-0.0173121	8.55029	0.000447094	0.0058764
Smp_027000.1	0.0107349	6.53101	0.000450122	0.00590504
Smp_172580.1	0.00934568	6.81527	0.000452116	0.00592004
Smp_166610.1	0.0174718	3.38593	0.000458815	0.00599084
Smp_163710.1	-0.0172889	8.89765	0.000460689	0.00600744
Smp_154600.1	-0.0217495	6.28253	0.000460997	0.00600744
Smp_074590.1	-0.0139441	5.01283	0.00046138	0.00600744
SmLINC145437-IBu	0.0233744	3.15466	0.000463171	0.00601563
SmLINC151258-IBu	-0.0543802	1.62608	0.000465042	0.00602693
Smp_139180.1	0.0258866	2.36516	0.000466588	0.00603573
Smp_245160.1	-0.0317609	2.09827	0.000468435	0.00605399
Smp_143300.1	-0.0218763	3.60768	0.000472159	0.00609081
SmLNCA111139-IBu	0.0844682	-0.451904	0.000473823	0.00610097
Smp_071380.1	0.012106	7.64413	0.00047562	0.00611845
Smp_175270.1	0.0167726	5.93025	0.000476444	0.00612338
Smp_213910.1	-0.0184652	7.25682	0.000480519	0.0061587
Smp_136710.1	-0.0268662	6.95096	0.000481655	0.00616758
Smp_313990.1	0.0130184	4.33353	0.00048257	0.00617361
Smp_082710.1	-0.0116695	6.83606	0.000488043	0.00623218
SmLNCA113448-IBu	0.025176	-0.437644	0.000489281	0.00624187
Smp_071000.1	-0.0148262	6.95271	0.000489699	0.00624187
Smp_320240.1	-0.0196214	6.33864	0.000492092	0.00626091
SmLINC122981-IBu	0.0304334	1.29352	0.00049314	0.00626279
Smp_187360.1	0.0170693	5.54307	0.000494589	0.00627547
Smp_086190.1	-0.0146196	7.03679	0.000497456	0.00629866
Smp_154530.1	-0.0073864	8.66018	0.000499496	0.0063147
Smp_325790.1	0.0482506	0.37229	0.000503942	0.0063536
Smp_089000.1	-0.0155972	7.95928	0.000505382	0.00636599
Smp_320340.1	-0.0177012	6.93605	0.000506708	0.00637159
Smp_031020.1	0.016146	1.81024	0.000511811	0.00642195
Smp_198660.1	0.0121324	3.72764	0.000512394	0.00642195
Smp_266750.1	0.0303148	5.66689	0.000512593	0.00642195
Smp_154270.2	-0.0123299	3.95882	0.000514688	0.00643069
Smp_083720.1	-0.0116004	7.51786	0.000518795	0.00647053
Smp_134440.1	-0.0116022	6.77886	0.000523177	0.00651864
Smp_343100.1	0.0266408	0.295675	0.000523589	0.00651864
Smp_129090.1	0.0222373	1.48944	0.000528266	0.00654608
SmLINC148989-IBu	0.0309555	-0.10231	0.000528615	0.00654608
Smp_102810.1	-0.0092825	5.29031	0.00053271	0.00659092
Smp_168270.3	0.0189497	2.76702	0.000537592	0.00662623
Smp_030690.1	-0.0112633	8.11179	0.000538105	0.00662623
SmLINC115074-IBu	0.0230246	2.03924	0.00053842	0.00662623
Smp_012480.1	-0.0186798	5.99312	0.000542161	0.00666637
Smp_174490.1	0.00903969	8.08557	0.000545422	0.00668415
Smp_245710.1	0.0127195	5.16256	0.000545527	0.00668415
Smp_305030.3	-0.00940273	4.68657	0.000546498	0.00669016
Smp_307090.7	0.0127482	3.46117	0.000548956	0.00671434
Smp_317420.1	0.0143115	9.1688	0.000550558	0.00672802
Smp_327730.1	-0.0122069	5.74962	0.000553678	0.00674246
Smp_266930.2	0.0348662	3.05214	0.000555642	0.00675456
SmLNCA127349-IBu	0.0224517	2.87969	0.000556653	0.00676096
Smp_089200.2	-0.021508	6.05435	0.00055925	0.00678067
Smp_247400.1	-0.0159496	3.63965	0.000560898	0.00679473
Smp_044850.1	0.0100834	5.39384	0.00056165	0.00679792
Smp_165550.1	-0.00978285	6.52595	0.000569336	0.00687898
Smp_137540.1	-0.00817828	6.5384	0.000579444	0.00695283
Smp_070020.1	0.0082421	7.43908	0.000581133	0.00696709
SmLINC158129-IBu	0.0224199	2.62895	0.000582901	0.00698228
Smp_090150.1	-0.00805672	6.44299	0.000584065	0.0069902
Smp_247870.1	0.0132417	6.01893	0.000585441	0.00699132
SmLINC137451-IBu	0.0216763	1.09258	0.000585666	0.00699132
Smp_054200.1	-0.0111333	6.80131	0.00058818	0.00701532
Smp_158560.4	0.00924738	5.91578	0.000594854	0.00708754
Smp_343860.1	0.00859807	4.98294	0.000595253	0.00708754
Smp_304260.1	-0.0191694	8.26095	0.000596252	0.00708871
Smp_169870.1	0.020485	6.52677	0.00059688	0.00708871
Smp_328790.1	-0.0222262	4.59526	0.000598148	0.00709772
SmLINC131144-IBu	0.0337104	-0.164306	0.000599523	0.00710216
SmLINC143590-IBu	0.0197566	2.49232	0.000600039	0.00710216
Smp_139100.3	-0.0215021	4.86933	0.000600563	0.00710216
Smp_097800.1	-0.00672321	9.82376	0.000602733	0.00711573
Smp_304450.1	-0.0247756	4.61885	0.000610245	0.00719831
Smp_144970.1	-0.0139723	7.32261	0.000612475	0.0072185
Smp_340850.1	-0.0101591	7.51382	0.00061331	0.00722222
Smp_166780.1	0.00974735	6.44337	0.000616961	0.00725907
Smp_205270.1	-0.01447	5.39825	0.000617858	0.00726348
Smp_017230.1	0.00682405	6.04056	0.000618843	0.00726892
Smp_176570.1	-0.0217375	2.79336	0.000621233	0.00728498
Smp_088090.1	0.0136801	3.77646	0.000621257	0.00728498
Smp_055200.2	-0.0070248	8.21254	0.000623189	0.00730149
Smp_145410.3	0.0142935	5.18121	0.000624435	0.0073038
Smp_035470.1	-0.00825782	8.71861	0.000625122	0.00730494
Smp_141970.1	-0.0101211	6.16055	0.000625797	0.00730494
Smp_072210.1	0.0135742	6.59374	0.000628654	0.00732027
Smp_179300.1	-0.0110105	8.71031	0.000632319	0.00735275
Smp_316220.1	0.0727678	2.54467	0.000634061	0.00735306
Smp_004470.1	-0.00888258	7.2468	0.000634458	0.00735306
SmLINC163597-IBu	0.0340705	0.290021	0.000637704	0.00737665
Smp_123570.1	0.00766041	6.41872	0.000640163	0.0073917
Smp_212830.2	0.00852062	5.63108	0.000649019	0.00747204
Smp_171020.1	-0.0162063	7.27229	0.000654286	0.00752023
Smp_347780.1	0.0211136	3.17469	0.000655954	0.00753319
Smp_079050.1	-0.0155152	4.78968	0.000657022	0.00753924
Smp_243720.2	-0.024171	5.77025	0.000660349	0.00757117
Smp_157050.1	-0.0248272	2.95356	0.000661649	0.0075736
Smp_301670.1	0.00903286	6.24412	0.000662559	0.00757778
Smp_179930.1	0.0121044	4.74103	0.000665681	0.00760724
Smp_162250.1	0.0262966	3.93344	0.000668048	0.00761863
Smp_169660.1	-0.00820265	5.54239	0.00066816	0.00761863
Smp_170630.1	-0.0197755	7.92965	0.00066832	0.00761863
Smp_307450.1	0.0307366	6.20066	0.000674558	0.00766463
Smp_213420.1	-0.0242309	2.69154	0.000676261	0.00767771
Smp_344100.1	0.00769573	5.89904	0.000678859	0.00769465
Smp_126720.3	0.00693233	5.75457	0.000682819	0.00772696
Smp_154320.1	-0.00743492	7.44023	0.000688684	0.00777096
Smp_053560.1	0.0288605	6.14117	0.00068999	0.00777649
Smp_322850.1	-0.0211062	3.56823	0.000692245	0.0077956
Smp_322830.1	0.0196584	5.06799	0.000695646	0.00782124
Smp_000100.1	-0.0207342	8.25102	0.000703293	0.00789447
Smp_156740.2	0.0130221	3.01927	0.000710692	0.00795826
SmLNCA170372-IBu	0.0237516	-0.0174592	0.000712542	0.0079633
Smp_028050.1	-0.0129728	4.80127	0.000712695	0.0079633
Smp_144450.2	0.0130616	6.30684	0.000712858	0.0079633
SmLNCA117803-IBu	0.0292175	2.55842	0.000713777	0.00796717
Smp_203280.1	-0.0124364	7.70979	0.000715373	0.00797443
SmLINC166051-IBu	0.0279596	2.89699	0.000718175	0.00799526
Smp_334710.1	-0.0167766	4.24332	0.000720205	0.00800682
Smp_340190.1	0.0139287	5.94952	0.000722529	0.00801984
Smp_082810.1	-0.00712805	8.1861	0.000724976	0.00803419
Smp_340780.1	-0.0130844	4.61087	0.000725751	0.00803463
Smp_340280.1	0.0218506	1.23207	0.00073065	0.00806709
SmLINC155104-IBu	0.0500543	1.10085	0.000730843	0.00806709
Smp_145400.1	0.0143133	4.49693	0.000738539	0.00813914
Smp_340270.1	-0.0146252	4.55805	0.000740471	0.00814381
Smp_342190.1	-0.0138939	7.35636	0.000740644	0.00814381
Smp_305870.1	0.0203547	5.53945	0.000743932	0.0081598
Smp_307000.1	-0.0232719	9.06724	0.00075055	0.00821944
Smp_175590.1	0.00876125	4.63976	0.000753119	0.00824064
Smp_342540.1	0.0133582	3.76799	0.000755966	0.00825278
Smp_316240.1	0.0592039	1.33702	0.000768889	0.0083676
Smp_132740.1	-0.0151735	6.05483	0.000771193	0.00838402
SmLNCA106570-IBu	-0.0300044	2.04066	0.000771602	0.00838402
Smp_161210.1	-0.0188401	4.39704	0.000774809	0.00840575
Smp_346930.2	-0.00850544	6.04456	0.000775569	0.00840743
Smp_017360.1	-0.00698552	8.47533	0.000776993	0.00841632
Smp_345500.1	-0.0363132	7.10638	0.000780234	0.00844486
Smp_246060.1	-0.0122781	4.19871	0.000786884	0.00847727
Smp_162110.1	-0.0244744	5.10562	0.000791848	0.00850442
SmLNCA152308-IBu	0.0295036	-0.151074	0.000796463	0.00854081
Smp_095910.1	-0.00889496	8.12842	0.000799303	0.00856467
Smp_046890.1	0.013248	5.55846	0.000800028	0.00856584
Smp_138880.2	0.0156928	4.65815	0.000806595	0.00862289
Smp_094420.1	-0.00628446	8.18536	0.000807744	0.00862854
Smp_003440.1	-0.0171181	5.25465	0.000809242	0.00863791
Smp_346270.2	0.0141031	3.70703	0.000812986	0.00865444
Smp_307270.1	-0.0310734	4.15617	0.00081714	0.00868119
Smp_158460.2	0.0191153	3.63667	0.000828988	0.00874813
Smp_346200.1	-0.00745163	6.36867	0.000828995	0.00874813
Smp_080370.1	0.0180014	8.22291	0.000831518	0.00876811
Smp_301320.1	-0.0106507	6.25315	0.000844769	0.00888277
Smp_165340.1	-0.0260816	1.6811	0.000847497	0.00888277
Smp_087620.1	0.00763268	8.048	0.000850546	0.00889777
Smp_145890.1	0.0104921	7.17464	0.000852273	0.00889935
Smp_344980.4	-0.0438279	6.08831	0.000852276	0.00889935
Smp_073560.1	-0.00642422	7.12391	0.000855545	0.00892678
Smp_333100.1	-0.00834776	7.31036	0.000857152	0.00893685
Smp_096160.1	0.00815859	4.96196	0.000860301	0.00894958
Smp_053230.1	-0.00911431	8.67292	0.000882629	0.00914767
Smp_342670.1	-0.0160521	3.52183	0.000883356	0.00914839
Smp_168590.1	-0.0132829	4.68756	0.000888997	0.00919958
SmLINC156933-IBu	0.0207101	3.21923	0.000890282	0.00919958
Smp_130890.1	-0.0145606	5.01842	0.000893995	0.00922425
Smp_134720.1	0.0119917	6.18265	0.000895558	0.00922904
Smp_027610.1	-0.0165101	8.73099	0.000895785	0.00922904
Smp_181470.1	0.0153669	7.00282	0.000896747	0.00923212
Smp_306230.2	0.0160761	4.14058	0.000899677	0.00925544
Smp_344620.1	-0.027736	3.93204	0.000902206	0.0092746
Smp_335140.1	0.0766054	2.42921	0.000904873	0.0092883
Smp_245450.1	-0.00695281	8.3322	0.000906086	0.0092916
Smp_203830.1	0.027441	2.34745	0.000920528	0.00938668
Smp_034920.1	-0.0208971	4.18597	0.000922708	0.00939374
Smp_139970.2	-0.0221274	7.47838	0.000923151	0.00939374
Smp_332850.1	0.0157985	5.88942	0.000926948	0.00939374
Smp_147090.1	0.0219809	1.09959	0.000928901	0.00939756
Smp_346150.1	-0.0213031	4.62285	0.000930188	0.00939756
SmLINC178293-IBu	-0.0249731	1.86537	0.00093096	0.00939756
Smp_315360.1	0.00997138	5.3392	0.000931047	0.00939756
Smp_008490.1	-0.0111133	7.61698	0.000935917	0.00942621
Smp_164010.3	-0.0294185	2.69214	0.000937057	0.00943088
Smp_161560.1	0.0102606	4.76268	0.000955214	0.0095446
Smp_121940.1	0.0246392	6.52576	0.000957462	0.00955818
Smp_147750.1	-0.0180868	2.9431	0.000963486	0.00960656
Smp_173210.1	0.00954995	6.3499	0.000982018	0.00974022
Smp_024180.1	-0.0201506	6.37528	0.000982989	0.00974022
Smp_334850.1	0.0476532	-0.496148	0.000992245	0.00979567
Smp_019310.1	-0.0157292	5.69245	0.000992306	0.00979567
Smp_140430.1	0.0105968	4.72307	0.000993559	0.00980023
Smp_340650.2	0.0226394	3.56036	0.000994424	0.00980023
Smp_139150.3	-0.0362372	2.65278	0.000996991	0.00980023
SmLINC148951-IBu	0.0148678	4.18513	0.000998808	0.00981115
Smp_133600.1	-0.0082562	7.60174	0.00100197	0.00981711
Smp_203390.2	0.0122512	4.57864	0.00100289	0.00981711
Smp_301980.1	-0.00849626	6.87835	0.00100822	0.00986185
Smp_150850.2	0.0205	3.53138	0.00101052	0.00987743
Smp_025860.2	0.0134078	3.75191	0.00101711	0.00992783
Smp_073280.1	-0.0129583	5.76778	0.00102076	0.00994953
Smp_317720.1	0.05875	2.35331	0.00102395	0.00997314
Smp_328600.1	0.0145746	6.07634	0.00102569	0.00997667
Smp_144940.1	0.00657672	7.28779	0.00102943	0.00998511
SmLINC168265-IBu	0.0352768	0.756999	0.00103196	0.00999065
Smp_000320.1	-0.016924	6.13311	0.00103286	0.00999065
Smp_343890.1	0.011761	5.42065	0.00103287	0.00999065
Smp_162380.1	0.0102804	5.21764	0.00103437	0.00999448
Smp_128630.1	0.00975883	6.59721	0.00104334	0.010064
Smp_085380.1	0.0155272	6.11166	0.00104444	0.0100665
Smp_202690.1	-0.00937835	8.27022	0.0010566	0.0101392
Smp_144240.1	0.0161397	2.33639	0.0010577	0.0101392
Smp_144240.2	0.0161397	2.33639	0.0010577	0.0101392
Smp_343280.1	-0.00983241	3.75841	0.00106025	0.0101567
Smp_102040.1	-0.00765027	9.21499	0.00106206	0.0101601
Smp_022340.1	-0.0124698	7.44903	0.00106377	0.0101676
Smp_096910.1	-0.0117819	5.2493	0.00106437	0.0101676
SmLINC109488-IBu	0.0214388	2.81044	0.00107565	0.0102548
Smp_001780.2	0.0249073	2.52831	0.00107956	0.010278
Smp_123860.1	-0.0151286	4.69547	0.00108201	0.0102929
Smp_344540.1	0.0400106	2.45405	0.00108737	0.0103312
Smp_126420.1	-0.021258	4.92655	0.00109458	0.0103911
Smp_009250.1	0.00612044	7.30842	0.00109749	0.010406
Smp_041600.1	-0.0055613	7.35005	0.00110048	0.0104223
Smp_174810.1	0.0166753	4.80976	0.0011007	0.0104223
Smp_064350.1	-0.0061215	7.09276	0.00110223	0.0104243
Smp_154760.3	-0.0290016	5.51322	0.00110285	0.0104243
Smp_345060.1	0.034919	0.197489	0.00110492	0.0104267
Smp_021790.1	0.014641	3.88652	0.00110926	0.0104551
SmLNCA153823-IBu	0.0207799	1.79378	0.00110943	0.0104551
Smp_200150.1	0.0505806	3.25679	0.00112641	0.0105876
Smp_168450.1	0.00843696	4.85172	0.00112654	0.0105876
SmLINC137413-IBu	0.0223437	0.656669	0.00114814	0.0107616
Smp_041630.1	0.0101486	6.73991	0.00115492	0.0107968
SmLINC163039-IBu	0.0292587	4.60562	0.00117035	0.0108963
Smp_195080.1	0.0111103	7.96711	0.00117082	0.0108963
Smp_166320.1	0.0111541	5.53909	0.00117131	0.0108963
Smp_153340.1	-0.00678509	7.46009	0.00117269	0.0108963
Smp_156400.2	0.0385047	1.74809	0.00117928	0.0109412
Smp_244360.1	-0.0180028	4.87674	0.00119351	0.0110308
Smp_061870.1	-0.00826661	7.24852	0.00119624	0.0110487
Smp_086330.1	-0.0153611	8.98557	0.00119994	0.0110756
Smp_006680.1	-0.0123604	6.44459	0.00120222	0.0110893
Smp_172480.1	0.00818344	4.62631	0.00120979	0.0111443
Smp_146140.3	0.0142944	2.4824	0.00121359	0.0111586
Smp_137300.1	-0.0306007	1.11638	0.00121374	0.0111586
Smp_051280.1	0.00609887	6.86587	0.00122655	0.0112541
SmLNCA164776-IBu	0.0163775	2.24329	0.00122934	0.0112722
Smp_180240.1	-0.0184784	6.84971	0.00124783	0.0114342
Smp_332450.1	-0.017551	4.67377	0.00125204	0.0114652
Smp_144140.1	0.00850277	6.26629	0.00126493	0.0115756
Smp_005500.1	0.00775893	6.32543	0.00126907	0.0116059
Smp_055670.1	0.00680885	5.52447	0.00127324	0.0116169
Smp_151560.1	-0.0163766	2.41855	0.00127537	0.0116169
Smp_322780.1	-0.0148672	3.58233	0.00127612	0.0116169
Smp_340880.2	0.00663953	7.7711	0.00128178	0.0116608
Smp_174700.1	0.0196339	3.16046	0.00128663	0.0116897
Smp_323900.1	0.0170194	1.75263	0.00129062	0.011703
Smp_319100.1	-0.00871248	6.71468	0.00129295	0.0117165
Smp_083710.1	-0.0108422	4.18168	0.00129826	0.0117417
Smp_098560.1	-0.00888758	6.37817	0.00129983	0.0117482
Smp_018360.1	0.00823553	7.64313	0.0013094	0.0118271
SmLINC156636-IBu	0.0282317	1.73271	0.00131219	0.0118446
Smp_174320.1	0.020744	3.2928	0.00132004	0.0119078
Smp_162350.1	-0.00933709	6.20856	0.0013231	0.0119276
Smp_031770.3	-0.0160503	5.80027	0.00132442	0.0119318
Smp_087550.1	-0.00695681	7.6097	0.00132867	0.0119623
SmLNCA132939-IBu	0.0346722	1.91624	0.0013395	0.0120215
Smp_243660.1	0.0115813	2.91236	0.00133956	0.0120215
Smp_341200.1	0.00955315	5.01852	0.00134746	0.0120768
Smp_063180.1	0.00656256	7.62707	0.00134882	0.0120813
Smp_058240.1	-0.010792	8.76257	0.00135971	0.012171
Smp_166500.1	0.00785084	7.22271	0.00137513	0.0122616
Smp_212190.1	-0.00870112	7.50611	0.00138422	0.0123269
Smp_093920.1	0.0079911	6.30286	0.00138834	0.0123399
Smp_082370.1	0.0107491	4.12118	0.00140324	0.0124285
Smp_033350.1	-0.007261	6.46419	0.00140366	0.0124285
Smp_342700.1	0.00699967	6.2758	0.00140975	0.0124586
SmLNCA126292-IBu	0.0194619	0.107954	0.00141261	0.0124759
Smp_015090.1	-0.00774179	8.42335	0.00141612	0.0124911
Smp_035210.1	-0.0154659	8.14194	0.00143457	0.012611
SmLINC132261-IBu	0.0258157	0.783256	0.00143712	0.0126124
Smp_129870.1	-0.0184418	4.28318	0.00144003	0.0126299
Smp_156550.1	0.0256065	-0.0555122	0.0014442	0.0126499
Smp_344610.2	-0.0159333	5.03007	0.00144593	0.0126499
Smp_345210.3	0.0302013	2.29488	0.00147435	0.0128491
Smp_103740.1	-0.00701495	5.99624	0.00147437	0.0128491
Smp_147670.1	0.0124381	5.03821	0.00148353	0.0129058
SmLINC152575-IBu	0.0214987	1.36695	0.00148631	0.0129138
Smp_106060.1	0.00880688	5.03278	0.00149842	0.0129949
Smp_024490.1	0.0126982	6.97759	0.00149929	0.0129949
Smp_079010.1	-0.0144596	5.57256	0.0014994	0.0129949
SmLNCA173145-IBu	-0.0679584	-0.0446817	0.00150545	0.0130236
Smp_075370.1	-0.0144745	6.88024	0.00151754	0.0131034
Smp_161530.2	0.0103302	5.93919	0.00152506	0.013152
Smp_344050.1	-0.0176408	3.79915	0.00153351	0.0132166
Smp_316380.1	-0.0308785	3.37389	0.00155431	0.0133711
Smp_156740.1	0.0299816	3.40673	0.00158256	0.0135638
SmLINC130991-IBu	0.0272418	0.808419	0.00158476	0.013566
Smp_196220.1	0.010455	5.65928	0.00160884	0.013724
SmLINC123030-IBu	0.0235673	-0.34551	0.00160913	0.013724
Smp_344170.1	-0.0179328	1.89405	0.00161276	0.0137436
Smp_198360.1	0.0169736	4.50632	0.00161341	0.0137436
Smp_248020.1	-0.0082267	4.54638	0.0016158	0.0137516
Smp_180680.1	-0.0166576	4.99768	0.00161633	0.0137516
Smp_245890.1	-0.009974	8.37534	0.00163695	0.0139016
SmLNCA100003251	0.0108126	4.45691	0.00163891	0.0139098
Smp_134640.3	0.0131108	2.0471	0.00164214	0.0139202
Smp_165230.1	0.0544398	2.95833	0.00164669	0.0139502
Smp_142050.1	-0.014268	5.05754	0.00164836	0.0139559
Smp_139030.2	0.0138043	3.41559	0.00165095	0.0139694
Smp_340980.1	0.0078666	5.24798	0.00165242	0.0139706
Smp_247360.1	0.0159476	6.57102	0.00165322	0.0139706
Smp_246870.1	0.00824061	6.00639	0.0016599	0.0139993
Smp_345440.1	-0.0190879	6.64633	0.00166052	0.0139993
Smp_102240.1	0.0103797	6.98115	0.00166182	0.0140018
Smp_310080.1	0.00962502	7.65881	0.00166407	0.0140122
Smp_084090.1	-0.014181	6.67414	0.00167069	0.0140509
Smp_340610.2	-0.0138476	3.45138	0.0016753	0.0140812
Smp_337610.2	0.0145379	3.9345	0.00168503	0.0141374
Smp_142620.1	-0.0191725	6.2841	0.00169449	0.0141825
SmLINC166676-IBu	0.0206058	2.48618	0.00171134	0.0142892
Smp_008850.1	-0.0192256	2.47028	0.00171722	0.0143178
Smp_018360.2	0.00686839	7.66211	0.0017217	0.0143351
Smp_125420.1	0.0155233	1.81426	0.00172373	0.014341
Smp_125890.1	0.0178937	4.78605	0.00173587	0.0143904
Smp_033530.1	-0.00926096	7.73155	0.00175282	0.0145102
Smp_343500.2	0.012335	3.17836	0.00176723	0.0145909
Smp_331510.3	0.0158078	2.42589	0.00176738	0.0145909
SmLINC127680-IBu	0.0241158	1.78712	0.00178288	0.0146939
Smp_010370.1	0.0366956	7.67242	0.00178303	0.0146939
SmLNCA122459-IBu	0.0262075	0.213649	0.00179142	0.0147456
Smp_037640.1	0.00618961	6.25135	0.00179561	0.0147713
Smp_059200.1	0.0146115	4.99052	0.00180739	0.0147983
Smp_212140.1	0.00534892	5.562	0.00183247	0.0149684
Smp_045010.1	-0.0152643	6.32466	0.00183762	0.0150016
Smp_021390.1	-0.0215611	2.622	0.00184434	0.0150389
Smp_194160.1	-0.00941245	6.92272	0.00184858	0.0150647
Smp_311660.2	0.0700558	6.37211	0.00185243	0.015074
Smp_308830.2	0.0215572	0.769365	0.00185575	0.0150877
Smp_159370.1	0.0109613	4.3797	0.00186003	0.0151049
Smp_343400.1	-0.0140177	3.16585	0.00186141	0.0151073
Smp_129260.1	-0.00659956	7.21627	0.00186635	0.0151385
Smp_069170.1	0.0169914	6.3035	0.00186835	0.0151459
Smp_162040.1	-0.0076005	8.60877	0.00188044	0.0152187
Smp_008900.2	0.021268	5.51633	0.00188835	0.0152637
Smp_014400.1	0.00700043	7.49759	0.00189432	0.0152852
Smp_345410.1	0.00577091	5.89663	0.00189854	0.0153104
Smp_179350.1	0.0159454	6.6916	0.0019062	0.0153455
Smp_153210.1	0.0190756	0.862953	0.00193166	0.0155056
Smp_147330.2	0.0192486	1.32466	0.00194358	0.0155833
Smp_061570.1	0.0137797	5.10451	0.00194793	0.015598
Smp_153990.2	-0.0202003	6.34465	0.00195361	0.0156278
Smp_129650.1	0.00611949	5.70036	0.00195531	0.0156324
Smp_344310.1	0.0252261	1.27529	0.00195747	0.0156406
SmLINC114378-IBu	0.0564902	0.260626	0.00195993	0.0156435
Smp_203950.1	0.0157901	6.37334	0.00196178	0.0156441
Smp_026910.1	-0.00851102	8.14959	0.00196273	0.0156441
Smp_070030.1	0.0192175	1.60197	0.00197828	0.0157209
SmLINC173155-IBu	-0.0442233	1.47835	0.00197881	0.0157209
Smp_072980.1	-0.00997483	8.41307	0.00197999	0.0157213
SmLINC177466-IBu	0.0178021	1.87595	0.00198508	0.0157437
Smp_246450.1	-0.0085787	6.53688	0.00199625	0.0158143
Smp_035090.1	0.00840779	6.37642	0.00200951	0.0158694
Smp_052290.1	0.0146538	1.60826	0.00200971	0.0158694
Smp_102450.1	0.00759173	6.81782	0.00201109	0.0158694
Smp_158690.1	0.0101129	3.86456	0.00201214	0.0158694
Smp_347370.1	-0.0438902	1.09691	0.00201304	0.0158694
Smp_243950.1	0.0103091	3.9916	0.00201574	0.0158694
Smp_163380.1	-0.0149477	5.55228	0.00202347	0.0159033
Smp_147150.2	0.00907038	6.02792	0.00203289	0.0159683
Smp_171680.1	-0.0175616	4.32857	0.00203688	0.0159816
Smp_129510.1	0.0327477	6.05358	0.00204099	0.0160048
Smp_143860.1	0.0123706	2.72187	0.00205309	0.0160586
Smp_126520.1	0.00490312	7.68615	0.00206591	0.0161366
SmLINC106420-IBu	0.0367305	0.148475	0.00206723	0.0161379
Smp_162500.1	-0.0243859	2.77917	0.00209017	0.0162887
Smp_028200.2	0.0134112	5.18278	0.00209124	0.0162887
Smp_140140.1	0.0127651	4.95886	0.00210922	0.0163829
Smp_059980.1	-0.0106939	8.00781	0.00211477	0.0163978
Smp_133770.1	0.0783497	1.5888	0.0021185	0.0164092
Smp_322640.1	-0.0487752	0.737568	0.00212233	0.0164281
SmLINC159148-IBu	0.0272569	-0.509397	0.00212576	0.0164325
Smp_086030.1	-0.00900644	6.73551	0.00213639	0.0165019
Smp_322810.1	-0.0140625	5.94575	0.00214064	0.0165165
Smp_244470.1	0.00847879	6.6598	0.00214066	0.0165165
Smp_154760.4	-0.0157402	7.74578	0.00215278	0.0165917
SmLINC121216-IBu	0.0152332	2.31133	0.0021703	0.0166805
Smp_340690.1	0.0108424	4.22572	0.0021733	0.0166851
Smp_163760.2	0.011011	5.37158	0.00217806	0.0166992
Smp_129310.1	0.027876	4.74191	0.00219171	0.0167802
Smp_138070.1	0.103332	-0.293257	0.00219593	0.0167941
Smp_136640.1	0.00574957	7.28756	0.00219914	0.0168094
Smp_347390.1	-0.0120774	7.19393	0.00221043	0.0168679
SmLNCA130282-IBu	0.0312743	-0.155761	0.00221256	0.0168749
Smp_157690.1	-0.0434675	6.12932	0.0022184	0.0168917
Smp_121160.2	0.0158662	3.63585	0.0022315	0.0169783
Smp_155850.1	-0.0244874	4.95181	0.00223721	0.0170069
Smp_162080.1	0.010168	6.43575	0.00224103	0.0170267
Smp_331890.1	0.025345	2.30322	0.00224601	0.017046
Smp_133110.2	0.00735122	6.52551	0.00226278	0.0171358
Smp_340440.1	0.0154406	5.32281	0.00227459	0.0172159
Smp_055800.1	-0.00815797	7.5278	0.00229236	0.017333
Smp_311650.2	0.010538	3.88894	0.00229333	0.017333
Smp_061580.1	0.00773569	6.22373	0.00229814	0.0173461
Smp_131600.1	-0.019311	3.34515	0.00229981	0.0173461
Smp_057650.1	0.0103439	8.61663	0.0023084	0.0173699
Smp_063190.1	0.0261777	0.782253	0.00231558	0.0174032
Smp_319540.1	-0.0240055	3.74946	0.00231629	0.0174032
Smp_132830.1	0.0256593	2.50339	0.00232085	0.0174145
SmLINC131336-IBu	0.0264535	0.99809	0.00232799	0.0174587
Smp_311170.1	-0.0162708	7.43239	0.00233486	0.0174819
SmLNCA111349-IBu	0.0299062	0.0695018	0.00233741	0.0174895
SmLINC128156-IBu	0.0170432	3.79773	0.0023503	0.0175315
Smp_331250.2	0.0216673	1.4169	0.00235173	0.0175328
Smp_082620.1	-0.00885599	7.7766	0.00235609	0.0175447
Smp_000150.1	0.00918857	6.65223	0.00235711	0.0175447
Smp_157360.1	-0.00861251	8.33084	0.00237309	0.0176166
Smp_341410.1	-0.0154577	4.82684	0.0023815	0.0176601
Smp_024580.1	-0.00634019	7.12055	0.00239448	0.017735
Smp_245250.1	-0.0281046	5.01459	0.00239541	0.017735
Smp_194380.1	0.018913	5.26255	0.00240265	0.0177791
Smp_332480.2	0.0136515	5.23304	0.00240922	0.0177993
Smp_196040.2	0.0128247	4.30732	0.00241059	0.0178
Smp_171140.2	0.0117202	6.33107	0.00241328	0.0178077
Smp_003270.1	0.0112061	5.6365	0.00241897	0.0178227
Smp_055100.1	0.0201849	6.2517	0.00242792	0.0178616
Smp_034300.1	0.0145537	4.92179	0.00244486	0.0179578
Smp_136040.1	0.00885639	5.54536	0.00247039	0.0180976
Smp_046360.1	0.00833451	5.50084	0.00248282	0.0181599
Smp_343780.1	0.0311955	1.36045	0.00248844	0.0181761
SmLINC138227-IBu	0.0235128	3.04216	0.00249093	0.0181761
SmLINC123493-IBu	0.0175083	2.01806	0.00249283	0.0181761
Smp_347550.1	-0.0253362	5.83129	0.00249423	0.0181761
Smp_245100.1	-0.0145394	6.12875	0.00250556	0.0182305
Smp_026280.1	0.00859998	6.56967	0.00250689	0.0182306
SmLNCA168250-IBu	0.0427393	-0.490329	0.00251213	0.0182516
Smp_201730.1	0.0198982	4.29202	0.0025124	0.0182516
Smp_121950.1	-0.0192536	8.16161	0.00252565	0.0183096
SmLINC152255-IBu	0.0220741	2.72202	0.00253081	0.0183375
Smp_084600.1	-0.0101771	6.47796	0.00254583	0.018408
Smp_002820.1	0.0114542	6.42206	0.00255394	0.0184571
Smp_319320.3	0.0249167	1.42446	0.0025793	0.0185728
Smp_015020.1	-0.0147857	6.06344	0.00259804	0.0186884
SmLINC113615-IBu	0.0278482	0.436925	0.00264711	0.0189825
Smp_004200.1	-0.00858953	7.08444	0.00265423	0.0190238
Smp_068270.2	0.00716764	6.53681	0.00265722	0.0190262
Smp_053030.1	-0.00660767	6.56829	0.0026573	0.0190262
Smp_054620.1	-0.0237847	3.65459	0.0026643	0.0190567
Smp_334670.1	0.0353695	2.35752	0.00267683	0.0191169
Smp_332900.1	0.0087424	5.54639	0.00268424	0.0191553
Smp_155030.1	0.00662544	5.29922	0.00270897	0.019287
SmLINC155651-IBu	0.0221492	1.06781	0.00271831	0.0193436
Smp_157350.1	0.00964899	7.01798	0.00272415	0.0193753
Smp_005190.1	0.0203479	5.54178	0.00273226	0.0194032
Smp_340740.1	0.0176266	2.23311	0.00274019	0.0194171
Smp_180160.2	0.0111214	6.39651	0.00278506	0.0196859
Smp_010820.1	-0.00779586	6.66018	0.0027862	0.0196859
SmLINC142005-IBu	0.0194956	0.404363	0.00279197	0.0197166
Smp_012440.1	-0.0151466	8.901	0.00279448	0.0197243
Smp_347790.1	-0.0106051	5.41544	0.00279737	0.0197247
Smp_344810.1	-0.0152893	6.22802	0.00280168	0.0197451
Smp_126370.1	0.009411	5.24746	0.00282195	0.0198679
Smp_026030.1	-0.0149681	3.1521	0.00283596	0.0199532
Smp_316230.1	0.0678695	1.3587	0.00283693	0.0199532
SmLINC140552-IBu	0.0376262	-0.338518	0.0028643	0.0201144
SmLNCA101833-IBu	0.0296894	-0.429063	0.00286709	0.0201144
Smp_336650.2	0.0170701	5.86587	0.00286905	0.020118
Smp_324130.1	0.0405525	1.65864	0.00287278	0.0201341
Smp_169730.1	0.00663016	5.74917	0.00289922	0.0202392
Smp_082780.1	0.0257823	4.88009	0.00291505	0.0203033
Smp_018440.1	-0.0227261	4.81593	0.00292538	0.020349
Smp_156960.1	-0.0267051	8.39513	0.00295708	0.0205425
SmLINC141491-IBu	0.0221438	0.0700556	0.00297834	0.0206658
Smp_244300.1	0.0160413	4.08388	0.00299268	0.020747
Smp_155810.1	-0.020836	6.09987	0.00301114	0.0208104
Smp_033700.1	-0.014344	4.586	0.0030129	0.0208122
Smp_033760.1	-0.00729477	7.13169	0.00302435	0.0208706
Smp_016380.1	0.0138765	5.3134	0.00304295	0.0209458
Smp_017420.1	-0.014375	4.89464	0.00304626	0.020949
SmLINC123561-IBu	0.0307572	2.1151	0.00306652	0.0210676
Smp_149960.1	0.00631395	7.30021	0.0030695	0.0210695
Smp_031190.2	-0.0105843	4.70883	0.00306983	0.0210695
Smp_210940.2	0.00931897	4.58381	0.0030749	0.0210939
Smp_332870.1	-0.00989531	5.50049	0.00308513	0.0211224
Smp_028670.1	-0.00777564	7.12639	0.00309113	0.0211531
Smp_340760.3	-0.0211666	7.78618	0.00309978	0.0212019
Smp_150500.1	0.0107974	7.96541	0.00312701	0.0213462
SmLINC127930-IBu	0.0634736	2.12728	0.00313286	0.0213756
Smp_127770.1	-0.0177298	4.25841	0.00313887	0.0213785
Smp_161080.1	0.013909	4.63375	0.00314991	0.0214289
Smp_127860.1	-0.0173415	2.59723	0.00316099	0.0214938
Smp_025670.1	0.00665898	5.38265	0.00318979	0.0216368
Smp_161750.2	-0.0168313	4.0161	0.00319594	0.021668
Smp_179720.1	0.00960749	6.5675	0.00320193	0.021698
SmLINC130559-IBu	0.0233043	0.595083	0.00320973	0.0217402
Smp_169050.1	-0.015092	5.26671	0.00321233	0.0217473
Smp_123600.1	0.00638137	6.7311	0.00323105	0.0218324
Smp_061480.1	0.00822304	5.23293	0.00324362	0.0218922
Smp_127440.1	0.0170656	6.09071	0.00329515	0.0221464
Smp_124000.2	-0.0137997	7.2797	0.00329836	0.0221522
Smp_125500.1	-0.00699388	6.09277	0.0033116	0.0222034
Smp_012350.3	0.00716255	5.73363	0.00332215	0.0222527
Smp_314220.1	-0.00672133	6.34163	0.00334037	0.0223425
SmLINC155649-IBu	0.0228293	1.07486	0.00335695	0.0224141
Smp_318920.1	-0.0266212	3.28898	0.00336192	0.0224257
Smp_044060.1	-0.01409	4.50814	0.00337036	0.0224674
Smp_203580.1	-0.0221376	5.23432	0.00337769	0.022484
Smp_011680.2	-0.0116559	9.78952	0.00339792	0.022597
Smp_137920.1	0.00587605	7.89946	0.00344283	0.0227977
Smp_097320.1	0.0111493	6.39468	0.00348236	0.0230048
Smp_123510.1	0.00565058	5.65135	0.00349447	0.0230733
SmLINC139696-IBu	0.0174539	2.19116	0.00350188	0.0230953
SmLINC148750-IBu	0.0160488	3.17438	0.00352137	0.0231744
Smp_171460.1	0.0112011	3.34604	0.00354205	0.0232776
Smp_342220.1	-0.00746406	5.17893	0.00354555	0.0232895
Smp_340490.1	0.0248157	6.13392	0.00356032	0.023372
Smp_159840.2	-0.0213082	4.32185	0.00356146	0.023372
SmLNCA142258-IBu	0.0185963	4.33072	0.00357088	0.0234228
SmLINC126337-IBu	0.0445166	0.292708	0.00357669	0.0234498
Smp_028850.2	0.0143278	3.98814	0.00358467	0.02348
SmLNCA110437-IBu	0.022644	0.810958	0.00359476	0.023535
Smp_156910.6	-0.0298307	5.9598	0.00363743	0.0237625
Smp_144430.2	0.0210171	6.02069	0.00363804	0.0237625
Smp_335180.2	0.0147693	2.29972	0.00364316	0.023774
Smp_144860.2	-0.0147734	3.52888	0.00365584	0.0238006
Smp_337410.2	0.00602114	6.15583	0.00369192	0.023957
Smp_144600.3	0.0215723	2.66148	0.0037038	0.0240229
Smp_016600.1	-0.0122963	6.39293	0.00371065	0.0240561
SmLINC142738-IBu	-0.0472086	2.14784	0.00371384	0.0240608
Smp_337140.5	-0.00854433	6.6854	0.0037241	0.0240872
Smp_167370.1	0.0147158	2.22114	0.00373359	0.024115
Smp_342070.1	0.013551	5.31639	0.00375062	0.0241689
Smp_342070.2	0.013551	5.31639	0.00375062	0.0241689
SmLINC161393-IBu	0.02277	3.95276	0.00380029	0.0243986
Smp_158030.1	0.00672698	5.84494	0.00381766	0.024465
Smp_171530.1	-0.00981403	5.34571	0.00382374	0.0244927
Smp_175020.1	-0.0114172	3.24562	0.00385298	0.024646
Smp_079640.1	-0.0218688	3.27862	0.00386999	0.0247207
Smp_129250.1	0.0193401	1.5964	0.00391567	0.0249438
Smp_171010.1	-0.0109577	3.22512	0.00394412	0.0250791
Smp_167020.1	0.00965244	4.22541	0.00395601	0.0251433
Smp_144770.1	-0.0121478	8.1873	0.00402697	0.0254269
Smp_344880.1	-0.0208658	3.59845	0.00407816	0.0256851
Smp_022740.1	0.0316618	0.139538	0.00410028	0.0258072
Smp_037590.1	-0.00813176	5.21936	0.00410613	0.0258072
Smp_037590.2	-0.00813176	5.21936	0.00410613	0.0258072
Smp_097180.2	0.0149475	4.66827	0.00412675	0.0258507
Smp_336800.1	-0.0159895	2.42501	0.0041428	0.0258994
Smp_032950.1	0.0272981	7.34933	0.00414383	0.0258994
Smp_334200.1	0.00677599	6.75416	0.00415761	0.0259622
Smp_176350.1	0.011357	5.55124	0.00419012	0.0261535
Smp_102840.2	0.0222651	2.8186	0.00420825	0.0262431
Smp_001500.1	0.00888912	8.16522	0.0042167	0.026276
Smp_039300.1	-0.008726	6.39653	0.00424147	0.0263786
SmLINC122986-IBu	0.0295203	-0.164267	0.00424685	0.0263786
SmLINC171806-IBu	0.027303	0.00781546	0.00425394	0.0264087
Smp_305740.2	-0.0190119	5.08172	0.00425736	0.0264087
Smp_308680.1	-0.0193517	4.09032	0.00426678	0.0264187
Smp_176410.1	-0.0272404	4.14463	0.00430141	0.0266095
Smp_346260.1	0.0100192	3.96378	0.00430845	0.0266316
Smp_156300.1	-0.0127737	5.8269	0.00436383	0.0268524
Smp_144080.2	0.00967885	5.31577	0.00437973	0.0269132
Smp_074560.3	0.0178932	6.34673	0.00440506	0.0270225
Smp_302090.1	-0.00878404	7.52729	0.00442962	0.0271326
Smp_129240.1	-0.00864353	6.10665	0.0044308	0.0271326
Smp_124450.1	0.00971335	6.28965	0.00448082	0.0273426
Smp_309710.4	0.0303348	5.91464	0.00456125	0.0276848
Smp_140270.2	0.0183105	3.01281	0.00456549	0.0276893
Smp_126240.1	-0.0223355	8.43422	0.00458219	0.027714
Smp_242800.1	0.00924424	6.87013	0.00463176	0.0278847
Smp_025380.1	-0.0114863	6.59219	0.00464356	0.0279437
SmLINC166001-IBu	0.0305828	1.73001	0.00468663	0.0281131
Smp_160290.1	0.0136325	3.70835	0.00468787	0.0281131
SmLINC163938-IBu	0.0257843	0.1272	0.00471189	0.0281843
SmLINC142669-IBu	-0.0332116	0.0347689	0.00471559	0.0281943
SmLNCA168214-IBu	0.020534	0.351064	0.00474819	0.0283053
Smp_171820.1	-0.00971013	7.83538	0.00478511	0.0284584
Smp_019190.1	0.0112442	6.91005	0.00479872	0.028496
Smp_247330.1	-0.016375	3.80735	0.00479969	0.028496
Smp_143580.1	0.0133212	2.4414	0.00480086	0.028496
Smp_078700.1	0.00857646	5.554	0.00482082	0.0285823
SmLINC128276-IBu	0.0263735	1.05462	0.00485896	0.0286989
Smp_331700.1	0.0120774	2.73089	0.00486173	0.0286989
Smp_319640.1	0.0381531	0.143682	0.00488648	0.0287991
Smp_246600.2	0.0312651	2.33986	0.00491221	0.0289226
Smp_148460.2	-0.0130085	6.7125	0.00496521	0.0291729
Smp_102690.1	-0.0069131	7.87044	0.00497201	0.0292006
Smp_308420.1	-0.00866379	6.79411	0.00498184	0.029246
SmLINC172840-IBu	0.0316758	-0.0663229	0.00498622	0.0292484
Smp_019890.2	0.0117486	5.12639	0.0050648	0.029633
SmLNCA152180-IBu	0.022748	1.21245	0.00507476	0.0296543
Smp_336780.1	-0.0176602	6.90884	0.00512301	0.0298817
Smp_344520.1	0.0310633	0.583726	0.00514467	0.0299522
Smp_096520.1	-0.0138754	2.94936	0.00514732	0.0299522
Smp_346570.1	0.018836	3.48523	0.00517006	0.0300593
Smp_194280.1	0.00961133	4.58858	0.00517726	0.0300865
SmLNCA136303-IBu	0.0585452	-0.168458	0.00525036	0.0303614
Smp_142150.2	0.0222647	0.477044	0.00526763	0.0304486
Smp_169200.1	-0.0210111	7.5142	0.00527976	0.030506
Smp_130580.1	0.00868274	8.41005	0.00528975	0.030551
SmLINC177329-IBu	0.0494175	0.26187	0.00533539	0.0307636
Smp_069600.2	-0.00943459	4.49504	0.00534527	0.030795
SmLNCA142779-IBu	0.042413	-0.17588	0.00540366	0.0310415
Smp_039590.1	0.0199421	2.77835	0.00541668	0.0311035
Smp_171550.1	0.00738024	5.21014	0.00546058	0.0312524
Smp_022140.1	0.00806057	5.68585	0.00546532	0.0312666
Smp_241960.1	0.0208284	2.56367	0.00548616	0.0313088
SmLINC144954-IBu	0.0157383	2.54002	0.00549163	0.0313271
Smp_071880.5	0.0116404	3.74901	0.00551343	0.0314126
Smp_333190.1	0.0128731	3.04649	0.00553381	0.0314902
SmLINC153596-IBu	0.0152116	2.23354	0.00554009	0.0315002
Smp_131060.1	0.0429614	1.64079	0.00558423	0.0316994
Smp_059150.1	-0.00549464	7.16679	0.0055894	0.0317158
Smp_004190.1	-0.0096799	6.76544	0.0056805	0.032128
Smp_068530.1	-0.0108171	8.09066	0.00569185	0.0321758
SmLINC100909-IBu	0.0441351	0.8028	0.00569736	0.0321758
Smp_344270.4	-0.0119963	4.08477	0.0056994	0.0321758
Smp_304800.5	0.00827112	5.56188	0.00573013	0.0322645
SmLINC165998-IBu	0.0321698	2.95466	0.00577259	0.0324641
SmLNCA136619-IBu	0.0213487	0.418847	0.00577826	0.0324659
Smp_331320.1	0.0275715	1.14342	0.00580322	0.0325574
SmLINC144956-IBu	0.0223001	1.57526	0.00581373	0.0326033
Smp_173610.1	0.0132857	4.61366	0.00586479	0.0327971
Smp_129900.2	-0.0123451	4.1493	0.0058758	0.0328191
Smp_244440.1	0.0141876	1.88753	0.00589134	0.0328587
Smp_040510.1	-0.0114585	6.46949	0.00593091	0.0329945
Smp_028210.1	0.0267064	1.64099	0.00595657	0.0330976
Smp_330630.1	-0.0197347	4.1706	0.0060465	0.0334403
Smp_062980.1	-0.00659745	8.32687	0.00606899	0.0335018
Smp_323430.2	0.0126771	3.46942	0.00607171	0.0335018
SmLINC152102-IBu	0.0249964	0.75751	0.00611042	0.0336569
Smp_151640.2	0.0235632	3.48164	0.00624396	0.0342299
Smp_326090.1	0.0109651	5.57067	0.00625996	0.0342906
Smp_345860.1	0.00503462	5.6421	0.00627823	0.0343636
Smp_300570.1	0.0243145	3.6806	0.00630763	0.0345109
Smp_081430.1	-0.0199025	7.18382	0.00632563	0.0345959
Smp_024860.1	0.0130549	2.93028	0.00636722	0.034755
Smp_012150.1	0.0053464	6.51784	0.00638943	0.0348353
Smp_033050.3	0.0185237	3.93589	0.00639556	0.034855
SmLINC167844-IBu	0.0114126	3.83969	0.00641471	0.0349458
Smp_158160.1	-0.0166665	2.8952	0.00643365	0.0350215
Smp_301170.1	0.010561	3.17987	0.00647488	0.0351478
Smp_174890.1	0.0197821	3.2268	0.00650477	0.0352295
Smp_140860.1	-0.0145387	5.26688	0.00651157	0.0352526
Smp_154760.2	-0.0427584	5.28518	0.00653686	0.0353209
Smp_087940.2	0.0186989	5.22148	0.00660905	0.0355728
Smp_140460.2	0.0079513	4.79796	0.00668978	0.035924
Smp_138210.1	0.0210278	6.4247	0.00680993	0.0363867
Smp_242230.1	0.00753497	5.27203	0.00684394	0.0365264
Smp_167630.1	-0.0163401	4.55405	0.00692549	0.0368909
Smp_103790.1	0.00676727	5.26551	0.00695227	0.0369487
Smp_204720.1	0.0267381	4.69416	0.00700013	0.0371463
Smp_333250.1	-0.0242573	5.23635	0.00701372	0.0371759
Smp_185680.1	0.0474273	4.14122	0.00705012	0.0373262
Smp_020400.3	0.0115765	3.29899	0.00706403	0.0373714
SmLINC146519-IBu	0.0257006	1.65003	0.00707891	0.0373911
Smp_191210.1	0.00706804	6.26695	0.00722066	0.0379136
Smp_045200.2	-0.0130855	9.62565	0.00723945	0.0379592
Smp_343310.1	-0.0167067	4.55078	0.0072661	0.0380643
SmLINC139695-IBu	0.0216877	2.5045	0.00727865	0.0381014
Smp_063670.1	0.0083018	5.31673	0.00730739	0.0382087
Smp_126720.4	0.009376	3.89962	0.00733805	0.0383317
SmLNCA123859-IBu	0.0146805	1.14418	0.00739127	0.0385459
SmLNCA152673-IBu	0.0273713	0.0498825	0.00740369	0.0385818
Smp_300840.2	0.0146133	2.01478	0.00741226	0.038612
Smp_334300.1	0.0106815	5.85553	0.00743149	0.038662
Smp_145180.1	0.00943888	5.37757	0.00743332	0.038662
Smp_311670.2	0.0738751	0.850999	0.00745257	0.0386898
Smp_345640.3	0.0618602	2.34978	0.00745547	0.0386898
Smp_051000.1	0.00834593	6.13787	0.00746676	0.038722
Smp_038980.1	0.00574335	5.9611	0.00749064	0.0388248
Smp_303980.1	-0.0117993	4.50492	0.00749888	0.0388346
Smp_163240.3	0.0306143	2.03573	0.00752	0.0388705
Smp_051290.1	-0.0239587	2.10869	0.00752511	0.0388797
SmLNCA117535-IBu	0.0291884	0.588039	0.00753471	0.03891
SmLINC160620-IBu	0.0294074	0.45487	0.00753656	0.03891
Smp_035260.1	-0.00797388	7.01184	0.0075468	0.038935
SmLINC137465-IBu	0.0304605	1.05017	0.00756067	0.0389911
Smp_156910.4	-0.0288448	7.13289	0.00760639	0.0391254
Smp_346660.1	0.011651	7.0037	0.00772422	0.0394629
Smp_088550.2	0.00642448	6.61362	0.00773094	0.0394743
SmLNCA143875-IBu	0.083374	-0.382944	0.00774379	0.0395109
Smp_321570.1	0.025752	1.56332	0.00782676	0.0398612
Smp_064510.1	0.00502908	7.23635	0.00786015	0.0399728
Smp_003610.1	0.00730297	7.12097	0.00793861	0.0402981
SmLINC161399-IBu	0.019828	1.10113	0.00795696	0.0403325
Smp_167920.1	0.010314	5.90847	0.00801601	0.040455
Smp_046290.1	-0.00725252	9.11598	0.0080258	0.0404897
Smp_203630.3	0.00708553	7.558	0.00803404	0.0404944
Smp_200900.1	0.0170192	5.71779	0.00807383	0.0406268
SmLINC164266-IBu	0.0180665	1.116	0.00807631	0.0406268
Smp_146840.1	-0.00944074	4.08295	0.00812731	0.0408316
SmLINC105295-IBu	0.0268093	0.206691	0.0081317	0.0408316
SmLNCA176906-IBu	0.0402777	0.386502	0.00820223	0.0410525
Smp_247070.1	-0.0143693	3.10947	0.00822962	0.0411599
SmLNCA121439-IBu	0.0138597	3.02843	0.00829177	0.0413947
Smp_245660.1	-0.0142549	3.47968	0.00830142	0.0414114
Smp_020370.1	-0.00722833	9.07406	0.00830369	0.0414114
Smp_213730.3	0.0115186	5.67459	0.00840298	0.0417266
Smp_029800.1	0.00988489	5.78036	0.00845346	0.0418881
Smp_320170.1	0.0142713	2.94964	0.00855711	0.0422789
Smp_200520.1	0.014801	1.39647	0.00862934	0.0424724
Smp_318440.1	-0.0441931	2.24437	0.00895203	0.0436745
SmLINC108799-IBu	0.0188878	1.14334	0.00899019	0.0438146
SmLNCA176214-IBu	0.0533953	0.184197	0.00900135	0.0438383
Smp_201330.1	0.0427103	4.13095	0.00903552	0.0439585
Smp_310770.1	0.0118131	5.54548	0.00905164	0.0439908
SmLINC132001-IBu	0.0162044	1.6314	0.00908255	0.0441103
Smp_328980.1	-0.0189564	5.50532	0.00918981	0.0445224
SmLNCA113393-IBu	0.0294707	-0.168835	0.00921322	0.0445738
SmLNCA124410-IBu	0.035135	-0.491486	0.00932586	0.0449625
Smp_301660.1	-0.0170185	3.08696	0.00936237	0.0450787
Smp_140590.1	0.0117132	7.43369	0.00938531	0.045124
Smp_310520.1	-0.0130425	4.11189	0.00946841	0.0453669
SmLNCA176905-IBu	0.0683743	-0.266133	0.00967406	0.0460468
SmLINC133371-IBu	0.0202741	5.56791	0.00968517	0.0460609
SmLINC166689-IBu	0.02497	0.667517	0.00968907	0.0460609
Smp_161160.1	0.00556928	8.01248	0.00979691	0.0463998
Smp_145140.1	-0.0131133	3.81109	0.00997975	0.0471514
SmLNCA144408-IBu	0.0618735	0.673567	0.0101159	0.047665
Smp_000990.1	0.00570191	6.38712	0.01016	0.0478081
Smp_170280.1	-0.0173571	6.77378	0.0102003	0.047928
Smp_344760.1	-0.0123673	3.47455	0.0102331	0.0480223
Smp_000100.3	-0.0160992	5.4668	0.010383	0.0486009
Smp_131990.2	0.0193035	6.05943	0.0104518	0.0487714
Smp_175390.1	-0.0134731	5.12082	0.0105801	0.0491234
Smp_133470.1	0.00831484	6.16903	0.0105801	0.0491234
Smp_020070.2	-0.0293606	4.59958	0.010596	0.0491455
Smp_158320.1	-0.00950989	6.35786	0.0106135	0.0491939
Smp_120070.2	0.0488024	-0.548778	0.0106615	0.0494001

## Sheet: Table S3
Table S3. List of transcripts differentially expressed from S. mansoni adult worm couples obtained from mice 14 hours after treatment with a single, sub-lethal dose of PZQ (100 mg/kg) delivered by intraperitoneal injection at 4 weeks post-infection (PRJNA597909)
transcript_ID	log2 Fold-change	log2 CPM	p-value	FDR
Smp_340060.1	2.76998	9.97378	7.21788e-12	9.7528e-08
Smp_337730.1	4.65323	7.6924	3.18797e-11	1.75374e-07
Smp_063330.1	1.81384	9.43563	3.89374e-11	1.75374e-07
Smp_046630.1	0.970243	9.34161	1.3294e-10	4.49071e-07
Smp_197540.1	-0.966069	7.7762	5.18613e-10	1.4015e-06
Smp_244640.1	1.87788	6.58837	8.39351e-10	1.87801e-06
Smp_244650.1	1.81548	6.21094	9.72919e-10	1.87801e-06
Smp_151420.1	1.10595	6.3483	1.21553e-09	2.05303e-06
Smp_311660.1	4.2155	8.90617	3.108e-09	4.66614e-06
Smp_141610.1	0.824609	11.5007	3.97698e-09	4.88762e-06
Smp_311670.1	4.16279	9.62139	4.25311e-09	4.88762e-06
Smp_166340.1	1.52842	7.27536	4.34069e-09	4.88762e-06
Smp_158620.1	-1.04248	5.64789	7.84731e-09	8.15637e-06
Smp_039000.1	-0.549311	7.02054	8.48932e-09	8.1934e-06
Smp_311630.1	3.07932	7.85889	1.06007e-08	9.02025e-06
Smp_017610.1	-1.86393	3.39326	1.06812e-08	9.02025e-06
Smp_322810.1	-0.931329	5.02727	1.2048e-08	9.57603e-06
Smp_336650.1	0.673793	6.30745	1.57101e-08	1.15353e-05
Smp_128610.1	-0.730238	8.4568	1.62204e-08	1.15353e-05
Smp_341300.1	-0.569204	8.54278	1.72782e-08	1.16732e-05
Smp_059530.1	1.09512	8.8943	1.81756e-08	1.16947e-05
Smp_341290.1	3.63314	5.12352	2.10632e-08	1.29366e-05
Smp_007550.1	0.617019	8.13973	2.68358e-08	1.43926e-05
Smp_242800.1	0.680388	6.85287	2.71665e-08	1.43926e-05
Smp_082940.1	-0.62601	7.60568	2.78878e-08	1.43926e-05
Smp_086480.1	-1.40398	8.51685	2.78906e-08	1.43926e-05
Smp_346610.1	-1.43108	7.57862	2.87596e-08	1.43926e-05
Smp_326040.1	-0.754324	6.49015	3.1036e-08	1.49771e-05
Smp_340860.1	-0.905569	6.10137	3.35149e-08	1.56156e-05
Smp_341590.1	-0.660311	9.44337	3.8423e-08	1.71069e-05
Smp_195090.1	-2.78099	3.8999	3.92476e-08	1.71069e-05
Smp_327950.2	-2.11132	2.47353	4.62095e-08	1.86273e-05
Smp_314640.2	0.77405	8.77769	4.6673e-08	1.86273e-05
Smp_074150.1	-0.537427	7.4546	4.68716e-08	1.86273e-05
Smp_081900.1	1.26044	7.05562	5.1588e-08	1.9188e-05
Smp_021730.1	-0.598292	9.01055	5.22018e-08	1.9188e-05
Smp_068530.1	0.782615	9.09523	5.35384e-08	1.9188e-05
Smp_136710.2	-0.635558	8.39398	5.39626e-08	1.9188e-05
Smp_128370.3	1.36541	7.43006	5.88924e-08	1.95546e-05
Smp_066430.1	-0.564399	7.12784	5.9075e-08	1.95546e-05
Smp_063090.1	-0.595701	8.25026	5.93353e-08	1.95546e-05
Smp_181470.1	1.31091	6.03996	6.41581e-08	2.01276e-05
Smp_011830.1	0.507301	9.44889	6.52481e-08	2.01276e-05
Smp_176930.1	1.07213	7.11996	6.6147e-08	2.01276e-05
Smp_019750.1	-0.794211	8.88943	6.70325e-08	2.01276e-05
Smp_309480.1	1.41821	7.61909	7.52181e-08	2.20945e-05
Smp_077390.1	-0.759681	7.3818	7.96731e-08	2.2788e-05
Smp_337660.1	-0.655479	6.37292	8.0952e-08	2.2788e-05
Smp_154680.1	-1.79767	3.92395	8.28896e-08	2.27982e-05
Smp_047370.1	-0.718439	8.86095	8.43628e-08	2.27982e-05
Smp_158480.1	-2.14927	5.79732	9.17007e-08	2.3956e-05
Smp_164590.1	-1.23928	10.524	9.21931e-08	2.3956e-05
Smp_089670.1	1.22269	9.15778	9.57531e-08	2.44116e-05
Smp_347370.1	-3.56641	1.73838	1.04985e-07	2.62696e-05
SmLINC170210-IBu	-0.606568	6.84364	1.08448e-07	2.63343e-05
Smp_042060.1	0.756356	6.84144	1.10493e-07	2.63343e-05
Smp_005290.1	-0.473136	7.88744	1.11091e-07	2.63343e-05
Smp_027480.1	-0.516035	7.57672	1.192e-07	2.77695e-05
Smp_164020.1	1.15574	4.32655	1.29182e-07	2.85319e-05
Smp_011000.1	1.57928	5.74741	1.32074e-07	2.85319e-05
Smp_087580.1	0.781117	7.67605	1.3238e-07	2.85319e-05
Smp_332010.1	-0.452162	6.96837	1.35433e-07	2.85319e-05
Smp_048830.1	-0.642099	6.51334	1.39832e-07	2.85319e-05
Smp_010710.1	-0.466221	7.63163	1.40317e-07	2.85319e-05
Smp_343740.1	-1.04176	11.0475	1.4104e-07	2.85319e-05
Smp_031770.2	-2.19604	6.90951	1.41059e-07	2.85319e-05
Smp_340760.4	-0.990999	8.66654	1.42917e-07	2.85319e-05
Smp_006730.1	0.729904	7.67864	1.45054e-07	2.85319e-05
Smp_316490.1	1.93643	5.82318	1.47462e-07	2.85319e-05
Smp_065180.1	-0.767485	7.91748	1.47812e-07	2.85319e-05
Smp_244160.1	1.41168	5.78617	1.52767e-07	2.85418e-05
Smp_059930.1	-0.613902	7.71204	1.53405e-07	2.85418e-05
Smp_152580.1	1.00147	5.68573	1.54949e-07	2.85418e-05
Smp_002510.1	-0.393875	6.64659	1.56957e-07	2.85418e-05
Smp_083720.1	-0.527763	7.91059	1.58425e-07	2.85418e-05
Smp_000880.1	-0.735593	9.13831	1.6144e-07	2.8561e-05
Smp_244960.1	2.32165	3.97921	1.62839e-07	2.8561e-05
Smp_123550.1	1.29105	5.33986	1.66865e-07	2.8561e-05
Smp_018170.1	0.863455	6.26906	1.66986e-07	2.8561e-05
Smp_051400.1	1.0667	5.46897	1.73137e-07	2.90122e-05
Smp_173480.1	0.477229	6.58985	1.74342e-07	2.90122e-05
Smp_091240.1	-0.518527	9.23795	1.76622e-07	2.90122e-05
Smp_313560.1	0.817325	9.57233	1.79658e-07	2.90122e-05
Smp_132210.1	1.07465	7.05866	1.8036e-07	2.90122e-05
Smp_148800.1	-0.662286	7.98836	1.87672e-07	2.98333e-05
Smp_340130.1	-0.728681	6.70738	1.99225e-07	3.09821e-05
Smp_154760.3	-0.576842	7.73892	1.99485e-07	3.09821e-05
Smp_053700.1	-0.670336	7.16751	2.03346e-07	3.12229e-05
Smp_322830.1	1.45112	5.16169	2.14209e-07	3.25213e-05
Smp_024120.1	-0.541151	8.51587	2.24033e-07	3.36348e-05
Smp_201030.1	-0.550441	8.51431	2.31099e-07	3.42811e-05
Smp_068280.1	-0.674814	9.13139	2.3492e-07	3.42811e-05
Smp_194770.1	-0.962111	9.32915	2.35949e-07	3.42811e-05
Smp_170010.1	0.875857	4.83024	2.40649e-07	3.4592e-05
Smp_095360.1	-0.665853	11.0463	2.50873e-07	3.5682e-05
Smp_020760.1	0.594505	7.2082	2.54689e-07	3.57175e-05
Smp_327730.1	-0.594452	6.2991	2.57972e-07	3.57175e-05
Smp_140610.1	0.412804	8.46779	2.59053e-07	3.57175e-05
Smp_126540.1	-0.674414	7.70191	2.68197e-07	3.66049e-05
Smp_128230.1	0.503599	7.64962	2.79285e-07	3.7156e-05
Smp_038870.1	-0.446767	7.52641	2.79937e-07	3.7156e-05
SmLINC138076-IBu	1.85402	2.52545	2.80984e-07	3.7156e-05
Smp_089290.1	0.598022	7.39727	2.83234e-07	3.7156e-05
Smp_009650.1	-0.524643	8.69056	3.14846e-07	4.09057e-05
Smp_340760.3	-0.90799	7.65343	3.23161e-07	4.15862e-05
Smp_331120.1	1.10067	4.80675	3.56446e-07	4.54368e-05
Smp_095520.1	-1.14693	8.6576	3.7909e-07	4.78717e-05
Smp_204770.1	-0.51111	8.94515	3.87861e-07	4.83442e-05
Smp_197370.1	-1.09304	11.4694	3.97463e-07	4.83442e-05
Smp_128920.1	0.65203	7.00424	3.98151e-07	4.83442e-05
Smp_311640.1	2.3891	5.36373	3.99279e-07	4.83442e-05
Smp_024180.1	-0.469975	6.68872	4.03112e-07	4.83442e-05
Smp_087550.1	-0.671985	7.90145	4.04299e-07	4.83442e-05
Smp_163220.1	0.683442	6.05334	4.19364e-07	4.97057e-05
Smp_162350.1	-0.634225	6.88737	4.43662e-07	5.21283e-05
Smp_346670.1	-0.381476	8.67252	4.60344e-07	5.32805e-05
Smp_340670.1	0.785259	8.13592	4.61354e-07	5.32805e-05
Smp_015980.1	-0.437005	7.13996	4.68142e-07	5.36063e-05
Smp_079220.1	-0.623057	9.5694	5.14243e-07	5.79486e-05
Smp_305100.2	0.477466	6.91119	5.1604e-07	5.79486e-05
Smp_033140.1	0.62809	5.04699	5.20488e-07	5.79486e-05
Smp_340920.1	-0.404766	6.31014	5.23219e-07	5.79486e-05
Smp_340760.2	-0.896655	8.54412	5.37071e-07	5.84946e-05
Smp_156910.6	-0.903274	7.29641	5.4469e-07	5.84946e-05
Smp_047060.1	-0.536909	7.73263	5.48308e-07	5.84946e-05
Smp_038100.1	-0.677647	10.0558	5.51606e-07	5.84946e-05
Smp_331670.1	-0.441921	6.62078	5.52837e-07	5.84946e-05
Smp_346610.4	-1.41771	7.61122	5.54123e-07	5.84946e-05
Smp_324820.1	4.04022	2.14668	5.73294e-07	6.00493e-05
Smp_077850.1	0.673146	5.65581	5.82093e-07	6.02543e-05
Smp_172460.1	2.12578	3.13148	5.84171e-07	6.02543e-05
Smp_089200.2	-1.82371	6.58663	6.04038e-07	6.11902e-05
Smp_042590.1	-0.437482	7.7777	6.05748e-07	6.11902e-05
Smp_030000.1	1.01707	8.74472	6.0683e-07	6.11902e-05
Smp_196160.1	-0.405376	6.89766	6.14541e-07	6.11906e-05
Smp_006860.1	1.81205	3.88689	6.2182e-07	6.11906e-05
Smp_025150.1	-0.522964	7.00644	6.23075e-07	6.11906e-05
Smp_036400.1	-0.420915	7.36933	6.24949e-07	6.11906e-05
Smp_307020.1	-1.07833	13.0911	6.3774e-07	6.19938e-05
Smp_071050.1	0.506085	5.87119	6.42693e-07	6.20291e-05
Smp_315060.1	-0.695951	6.33684	6.50877e-07	6.23734e-05
Smp_079710.1	-0.600964	6.12642	6.6386e-07	6.27343e-05
Smp_340130.2	-0.90641	9.17187	6.63929e-07	6.27343e-05
Smp_041430.1	-0.561693	8.305	6.93201e-07	6.50454e-05
Smp_017710.2	0.655799	7.08081	7.28616e-07	6.76302e-05
Smp_194980.1	0.585035	6.48513	7.30759e-07	6.76302e-05
Smp_069170.1	-0.556267	5.55365	7.66185e-07	7.04264e-05
Smp_002880.1	-0.552275	9.75149	7.74433e-07	7.07036e-05
Smp_056200.1	-0.513752	7.13462	7.90683e-07	7.17027e-05
Smp_134720.1	0.474011	6.02496	8.01249e-07	7.18275e-05
Smp_144220.1	-0.771737	6.58326	8.0269e-07	7.18275e-05
Smp_034500.1	1.02853	5.30496	8.09825e-07	7.19892e-05
Smp_198930.1	-0.338957	7.24886	8.22828e-07	7.2667e-05
Smp_144010.1	-0.46653	8.07354	8.41407e-07	7.38253e-05
Smp_247530.1	-0.570895	5.11132	8.54122e-07	7.44574e-05
Smp_157310.1	-0.805631	4.98129	8.92042e-07	7.72646e-05
SmLINC003840-IBu	-0.643803	5.76235	9.1342e-07	7.86123e-05
Smp_129080.1	-0.574879	7.82054	9.19691e-07	7.86511e-05
Smp_088270.1	0.551377	7.19876	9.3167e-07	7.88225e-05
Smp_095360.2	-0.6301	9.07792	9.33362e-07	7.88225e-05
Smp_154840.1	0.35515	7.34596	9.43751e-07	7.92047e-05
Smp_140020.2	0.765171	6.56476	9.53571e-07	7.95349e-05
Smp_018360.2	0.479681	6.85603	9.73991e-07	8.07397e-05
Smp_061940.1	-0.440302	7.82877	9.80886e-07	8.08154e-05
Smp_152180.1	0.521711	7.32934	1.00705e-06	8.24683e-05
Smp_151100.1	-0.463792	6.21125	1.06025e-06	8.53756e-05
Smp_179460.1	-0.60214	8.56199	1.06099e-06	8.53756e-05
Smp_074080.1	-0.868041	7.91013	1.06151e-06	8.53756e-05
Smp_179810.1	-0.710206	9.53915	1.08594e-06	8.68239e-05
Smp_086760.1	-0.352325	7.28791	1.15862e-06	9.1754e-05
Smp_322240.1	-0.391552	6.68695	1.1624e-06	9.1754e-05
Smp_203950.1	0.73458	6.30849	1.16798e-06	9.1754e-05
Smp_170030.1	-0.449371	7.29503	1.21953e-06	9.52501e-05
Smp_140480.1	-0.533228	7.39805	1.28749e-06	9.99799e-05
Smp_103560.1	-0.696511	6.54561	1.32933e-06	0.00010264
Smp_155530.1	-1.03724	3.41082	1.3848e-06	0.000105835
Smp_088950.1	0.754893	7.40266	1.38638e-06	0.000105835
Smp_246550.4	0.510531	5.00879	1.43078e-06	0.00010843
Smp_053900.1	0.502247	8.83628	1.43643e-06	0.00010843
Smp_058380.1	2.78681	5.41757	1.45168e-06	0.000108934
Smp_333010.1	-0.467874	11.9534	1.46302e-06	0.000108934
Smp_332370.1	-0.494561	5.98833	1.4745e-06	0.000108934
Smp_195060.1	0.891929	4.86342	1.47535e-06	0.000108934
Smp_084090.1	-0.551109	7.4653	1.49607e-06	0.000109864
Smp_245090.1	0.551695	7.41272	1.52001e-06	0.000110554
Smp_123830.1	-1.07865	10.8829	1.52184e-06	0.000110554
Smp_015730.1	-0.590135	7.87959	1.53256e-06	0.000110738
Smp_161680.1	-0.295155	7.67652	1.54651e-06	0.000111151
Smp_345640.3	3.43563	0.78491	1.59711e-06	0.000114059
Smp_310180.1	0.799166	7.98169	1.60385e-06	0.000114059
Smp_021920.1	-0.663206	10.4188	1.66261e-06	0.000117618
Smp_166680.1	-0.326942	6.15518	1.68179e-06	0.000118356
Smp_017830.1	-0.399121	8.22402	1.69323e-06	0.000118544
Smp_314500.1	-0.922821	4.85669	1.71608e-06	0.000119524
Smp_008440.1	-0.46966	6.21058	1.75513e-06	0.000121303
Smp_072490.1	0.318082	6.31185	1.75957e-06	0.000121303
Smp_342420.1	0.5843	4.79896	1.77377e-06	0.000121661
Smp_124240.2	-0.562284	7.55201	1.82117e-06	0.000124281
Smp_146160.3	1.57453	2.85134	1.88954e-06	0.000128299
Smp_246330.1	0.404484	6.16051	1.92868e-06	0.000129935
Smp_170340.1	-0.672131	9.65695	1.93287e-06	0.000129935
Smp_084600.1	-0.410507	6.80211	1.96678e-06	0.000131053
Smp_033040.1	-0.336051	8.39588	1.97749e-06	0.000131053
Smp_126220.1	-2.67575	1.563	1.98127e-06	0.000131053
Smp_083730.1	0.383656	10.2796	1.98829e-06	0.000131053
Smp_075770.1	0.521822	6.55618	2.02697e-06	0.000132953
Smp_333840.1	1.83238	2.61285	2.04495e-06	0.000133485
Smp_311660.2	3.4087	4.59157	2.08439e-06	0.000135405
Smp_128370.2	1.76632	6.15089	2.10445e-06	0.0001359
Smp_078750.1	-0.43555	8.34566	2.11606e-06	0.0001359
Smp_333250.1	-0.650292	5.0906	2.12218e-06	0.0001359
Smp_321910.1	-0.527956	6.41835	2.18515e-06	0.000139273
Smp_131990.2	0.478163	6.12949	2.27837e-06	0.000143976
Smp_082570.1	-0.395946	7.9044	2.28026e-06	0.000143976
Smp_152960.1	0.490745	5.40078	2.35358e-06	0.000147914
Smp_049170.1	0.394317	7.34169	2.37532e-06	0.000147997
Smp_136710.1	-0.681111	8.23206	2.3768e-06	0.000147997
Smp_160810.1	-0.311126	6.1255	2.39507e-06	0.000148451
SmLINC112783-IBu	-2.94468	0.315363	2.43083e-06	0.000148842
Smp_078800.1	0.430205	6.75994	2.43411e-06	0.000148842
Smp_079920.1	-0.344662	7.50197	2.44544e-06	0.000148842
Smp_079920.2	-0.344662	7.50197	2.44544e-06	0.000148842
Smp_064430.1	-0.528742	6.44144	2.53379e-06	0.000153527
Smp_024820.1	-0.324177	8.00294	2.57497e-06	0.000155239
Smp_074460.1	-0.602904	5.29587	2.58502e-06	0.000155239
Smp_320450.1	0.595621	6.88705	2.61423e-06	0.000156299
Smp_332450.1	-0.778384	5.39494	2.65241e-06	0.000157205
Smp_046100.1	-0.441822	7.40193	2.65266e-06	0.000157205
Smp_135770.1	0.514276	6.38109	2.69714e-06	0.000158927
Smp_174720.1	-0.481962	6.99927	2.71074e-06	0.000158927
Smp_203280.1	-0.707346	8.66304	2.72237e-06	0.000158927
Smp_345170.1	-0.935041	4.94388	2.72877e-06	0.000158927
Smp_011680.2	0.625845	9.58841	2.74498e-06	0.000159185
Smp_139760.1	0.357278	6.16504	2.87443e-06	0.000165665
Smp_136590.1	-0.364367	6.806	2.88124e-06	0.000165665
Smp_006680.1	-0.548592	6.1829	2.89583e-06	0.000165799
Smp_020550.1	2.47803	4.93031	2.92064e-06	0.000166514
Smp_130440.1	-0.344724	8.02565	2.93886e-06	0.000166848
Smp_322410.1	-0.447661	8.2878	2.95784e-06	0.000167201
Smp_123300.1	-1.20143	3.41379	2.96982e-06	0.000167201
Smp_211020.2	-0.863553	5.86242	3.0024e-06	0.000168064
Smp_174510.1	-0.595387	6.63639	3.01002e-06	0.000168064
Smp_307450.3	2.93247	7.45135	3.05026e-06	0.00016934
Smp_128860.1	0.384052	6.14964	3.05794e-06	0.00016934
Smp_082780.1	-0.993604	4.37549	3.13761e-06	0.000172397
Smp_132740.1	-0.682254	7.274	3.14927e-06	0.000172397
Smp_133830.1	1.43356	5.62459	3.1542e-06	0.000172397
Smp_245260.1	-0.312954	6.55849	3.16418e-06	0.000172397
Smp_244610.3	1.15729	4.11452	3.29211e-06	0.000178646
Smp_156230.1	-0.714918	7.09415	3.3655e-06	0.000181214
Smp_154760.2	-1.68734	6.44274	3.36625e-06	0.000181214
Smp_169260.1	-0.562953	7.38688	3.39409e-06	0.000181988
Smp_171780.1	-0.663047	8.9205	3.44222e-06	0.000183839
Smp_150340.1	-0.569424	6.15124	3.4627e-06	0.000184205
Smp_195080.1	0.417171	8.46622	3.49153e-06	0.00018501
Smp_158030.1	0.47807	5.99827	3.56677e-06	0.000188074
Smp_129510.1	1.42686	4.75826	3.5772e-06	0.000188074
Smp_024110.1	-0.47982	11.4069	3.60253e-06	0.000188672
Smp_089200.1	-1.51591	7.38024	3.651e-06	0.000189883
Smp_127200.1	-0.462779	6.56571	3.66674e-06	0.000189883
Smp_132670.1	-0.702368	11.2117	3.66781e-06	0.000189883
Smp_332730.1	-0.354449	8.40943	3.73957e-06	0.000192859
Smp_303550.1	0.608451	11.5265	3.82234e-06	0.000196378
Smp_340760.8	-0.957975	8.5047	3.86543e-06	0.00019784
Smp_008310.1	-0.375204	8.09874	3.88925e-06	0.000198308
Smp_162010.1	0.784548	3.61557	3.93235e-06	0.000199752
Smp_310260.1	-0.463092	5.91773	3.98986e-06	0.000201914
Smp_134510.1	-0.604628	7.20124	4.04609e-06	0.000203995
Smp_041460.1	0.761306	5.70343	4.07968e-06	0.000204905
Smp_010280.1	0.442761	6.00062	4.10881e-06	0.000204905
Smp_018680.1	-0.437681	6.19456	4.10962e-06	0.000204905
Smp_038950.1	-0.507302	11.2215	4.18522e-06	0.000207907
Smp_159600.1	-0.727128	7.50935	4.22421e-06	0.000209075
Smp_087250.1	-0.650533	8.93893	4.26722e-06	0.000210273
Smp_000260.1	0.432436	11.2828	4.27953e-06	0.000210273
Smp_006760.2	-1.64613	2.10951	4.34141e-06	0.00021254
Smp_267080.1	-0.823294	6.93364	4.4125e-06	0.000214072
Smp_099420.1	-0.505664	6.2593	4.42633e-06	0.000214072
Smp_179300.1	-0.592764	9.35397	4.44979e-06	0.000214072
Smp_212870.1	-0.60251	5.24694	4.46038e-06	0.000214072
Smp_018250.1	-0.852909	8.96101	4.46111e-06	0.000214072
Smp_157070.1	0.518471	6.82647	4.46775e-06	0.000214072
Smp_309720.1	0.409616	7.53638	4.52433e-06	0.000215986
Smp_306180.1	2.40166	2.27226	4.53967e-06	0.000215986
Smp_085380.1	0.416754	5.97049	4.58232e-06	0.00021725
Smp_340910.1	-0.467769	8.23139	4.60582e-06	0.000217601
Smp_166340.2	1.79543	3.49684	4.6425e-06	0.000218014
Smp_141680.1	0.400424	7.84721	4.64685e-06	0.000218014
Smp_163610.1	-1.22069	6.90573	4.84243e-06	0.000225675
Smp_147070.1	-0.65984	5.20883	4.84353e-06	0.000225675
Smp_014050.1	0.339149	6.28544	4.88966e-06	0.000227042
Smp_031920.1	-0.469367	5.9945	4.93864e-06	0.000228468
Smp_161360.1	-0.61109	5.53107	4.9542e-06	0.000228468
SmLNCA102665-IBu	1.84955	6.26032	5.09648e-06	0.000233584
Smp_128370.1	0.828384	8.18844	5.09972e-06	0.000233584
Smp_058150.1	-0.499635	7.47166	5.18534e-06	0.000236704
Smp_343700.1	1.00889	3.8815	5.27921e-06	0.000240178
Smp_017230.1	0.592012	5.62249	5.36465e-06	0.000243246
Smp_315740.3	-0.405113	6.44301	5.39649e-06	0.000243871
Smp_048430.3	0.768862	8.64656	5.51708e-06	0.000248489
Smp_019350.1	0.377717	9.0156	5.53759e-06	0.000248584
Smp_159100.1	-0.469964	7.39256	5.6221e-06	0.000251258
Smp_139070.1	0.390294	6.91457	5.64935e-06	0.000251258
Smp_019730.1	-0.296621	8.17168	5.65294e-06	0.000251258
Smp_031050.1	0.453576	8.22299	5.71062e-06	0.00025299
Smp_312450.2	-0.915814	5.32141	6.01559e-06	0.000265429
Smp_133340.1	-0.45535	6.31678	6.03089e-06	0.000265429
Smp_131250.3	0.337615	8.00683	6.0561e-06	0.000265429
Smp_040280.1	0.259577	6.5037	6.06998e-06	0.000265429
Smp_004550.1	-0.484155	7.36565	6.15993e-06	0.000267713
Smp_008660.2	1.36095	10.2065	6.16185e-06	0.000267713
Smp_152940.2	0.762832	5.67301	6.21914e-06	0.00026865
Smp_007650.1	-0.327123	8.98214	6.22317e-06	0.00026865
Smp_042150.1	0.951944	4.18664	6.28235e-06	0.000270341
Smp_037910.1	-0.422739	7.50132	6.36212e-06	0.000272073
SmLINC110492-IBu	3.56924	1.8394	6.3685e-06	0.000272073
Smp_045920.2	-0.5012	5.3329	6.39773e-06	0.000272073
Smp_033670.1	-0.36465	8.20217	6.41059e-06	0.000272073
Smp_200190.1	-0.403496	9.6144	6.43496e-06	0.000272073
Smp_326090.1	0.821439	6.0752	6.4484e-06	0.000272073
Smp_201060.1	-1.28386	9.1068	6.46353e-06	0.000272073
Smp_052350.1	0.485478	5.8913	6.53905e-06	0.000274396
Smp_014780.1	0.296845	9.20687	6.60559e-06	0.000276331
Smp_008660.1	1.08833	6.69049	6.698e-06	0.00027846
Smp_160180.1	-0.574967	4.35398	6.70561e-06	0.00027846
Smp_125130.1	-0.563188	5.23809	6.71832e-06	0.00027846
Smp_203130.1	-0.703455	11.3962	6.7631e-06	0.000279459
Smp_090890.1	-0.470924	6.42665	6.8228e-06	0.000281066
Smp_314790.1	0.852692	9.69163	6.95933e-06	0.000285134
Smp_102840.1	-0.279849	6.44143	6.98441e-06	0.000285134
Smp_344740.1	0.856369	4.96997	6.98487e-06	0.000285134
Smp_173610.1	-0.618921	4.64657	7.01238e-06	0.000285395
Smp_148820.1	-1.09219	3.32418	7.07722e-06	0.000287169
Smp_060080.1	-0.313567	6.86712	7.22022e-06	0.000290686
Smp_214060.1	-0.369953	10.4248	7.22264e-06	0.000290686
Smp_056440.1	-0.382819	7.92252	7.24801e-06	0.000290686
Smp_085540.2	-2.08275	9.29088	7.25705e-06	0.000290686
Smp_073490.1	0.915612	5.38199	7.27144e-06	0.000290686
Smp_121190.1	-0.547602	5.67161	7.40796e-06	0.000295269
Smp_124920.1	0.356857	7.14347	7.43484e-06	0.000295469
Smp_334510.1	0.862185	7.07414	7.45953e-06	0.000295581
Smp_078230.1	0.426139	6.17636	7.72005e-06	0.00030501
Smp_001100.1	-0.783203	8.46825	7.7809e-06	0.000306263
Smp_316640.1	0.939232	3.76015	7.79711e-06	0.000306263
Smp_064330.1	-0.573026	6.9467	7.91011e-06	0.000308393
Smp_046740.1	-0.436249	7.79204	7.91371e-06	0.000308393
Smp_079840.2	-0.389306	6.01281	7.92692e-06	0.000308393
Smp_092490.1	-0.332007	6.98655	7.94264e-06	0.000308393
Smp_123670.1	0.427087	7.16589	8.05332e-06	0.000311795
Smp_000310.2	0.309103	6.06676	8.16052e-06	0.000314817
Smp_337800.3	-0.49296	5.25313	8.17797e-06	0.000314817
Smp_204260.1	-0.933756	3.07882	8.21312e-06	0.000315272
Smp_042550.1	-0.498569	5.39323	8.30264e-06	0.000317805
Smp_135560.1	-1.10874	11.7172	8.38402e-06	0.000320014
Smp_139970.2	-0.75024	7.57783	8.58192e-06	0.000326645
Smp_086530.1	-1.23431	9.99186	8.65224e-06	0.000327538
Smp_151140.1	-0.296891	7.46991	8.65388e-06	0.000327538
Smp_129610.1	-1.29151	3.34761	8.7622e-06	0.000330712
Smp_125070.1	0.712093	6.91996	8.80544e-06	0.000331418
Smp_043670.2	0.324792	9.22734	8.89913e-06	0.00033377
Smp_205760.1	-1.04574	7.48334	8.91734e-06	0.00033377
Smp_332640.1	-2.65576	6.4844	9.03575e-06	0.000337268
Smp_031880.1	-0.312343	9.49172	9.18934e-06	0.000342056
Smp_089640.1	-0.289047	8.26006	9.22582e-06	0.000342224
Smp_132750.1	-1.40381	2.41507	9.24451e-06	0.000342224
Smp_012980.1	0.527014	7.08961	9.31757e-06	0.000343986
Smp_133770.1	5.96521	0.813536	9.50176e-06	0.000349831
Smp_106080.1	-0.293363	7.57756	9.68655e-06	0.000354849
Smp_302360.1	0.456792	8.36356	9.71056e-06	0.000354849
Smp_212190.1	-0.318192	7.3749	9.71684e-06	0.000354849
SmLNCA175820-IBu	-1.84636	2.30566	9.95326e-06	0.000362503
Smp_071390.1	-0.499918	7.72022	1.00837e-05	0.000365629
Smp_173790.1	0.29108	6.98948	1.00932e-05	0.000365629
SmLNCA129261-IBu	0.7804	5.46891	1.01787e-05	0.000367741
Smp_139980.1	-0.519585	5.08573	1.02742e-05	0.000369624
Smp_120700.1	-0.419669	9.38156	1.02894e-05	0.000369624
Smp_175090.1	-0.677695	8.94907	1.0333e-05	0.000369624
Smp_017430.1	0.359777	10.0531	1.03828e-05	0.000369624
Smp_017430.2	0.359777	10.0531	1.03828e-05	0.000369624
Smp_134390.1	1.65207	4.42498	1.0395e-05	0.000369624
Smp_332850.1	0.455805	6.61071	1.06054e-05	0.000376117
Smp_026560.1	-0.336964	9.35461	1.06496e-05	0.000376694
Smp_244920.1	0.838635	5.36846	1.07016e-05	0.000377546
SmLINC117610-IBu	1.03651	3.51255	1.07507e-05	0.000378292
Smp_139970.1	-0.529266	6.29362	1.08713e-05	0.00038154
Smp_042160.1	-0.406347	12.1929	1.12307e-05	0.000393131
Smp_021600.1	-0.719904	5.99898	1.12859e-05	0.000394045
Smp_159370.1	-0.654737	3.75431	1.14102e-05	0.000397294
Smp_074570.1	1.96335	4.21764	1.14378e-05	0.000397294
Smp_213910.1	-0.670866	8.70567	1.1478e-05	0.000397667
Smp_020550.2	-0.811298	7.71052	1.17337e-05	0.000405489
Smp_121940.1	0.63697	5.56442	1.19245e-05	0.000409137
Smp_065210.1	-0.369243	7.54204	1.19363e-05	0.000409137
Smp_312580.1	-2.21453	6.1637	1.19563e-05	0.000409137
Smp_132200.1	0.442814	5.20955	1.19604e-05	0.000409137
Smp_126480.1	-0.489267	9.22345	1.19985e-05	0.000409405
Smp_086330.1	-0.59679	9.23873	1.20936e-05	0.000411609
Smp_204390.1	-0.428132	5.19793	1.23132e-05	0.000418031
Smp_180660.1	2.10004	1.56003	1.2377e-05	0.000419144
Smp_072210.1	0.600481	6.23314	1.26487e-05	0.000427274
Smp_078690.1	-0.481226	9.59514	1.29117e-05	0.00043507
Smp_072980.1	-0.271265	8.44597	1.31341e-05	0.000441461
Smp_247740.1	0.303994	5.89717	1.32606e-05	0.000444609
Smp_123010.3	0.690878	7.59453	1.35088e-05	0.000451274
Smp_135230.1	-1.38775	3.49373	1.35321e-05	0.000451274
Smp_067480.1	1.0401	7.36063	1.36178e-05	0.000451274
Smp_085540.1	-0.618431	12.0874	1.36261e-05	0.000451274
Smp_045200.2	-0.956695	9.70687	1.36264e-05	0.000451274
Smp_124390.1	0.491701	6.96206	1.37039e-05	0.00045242
Smp_067140.1	0.340993	7.63596	1.3728e-05	0.00045242
Smp_147420.1	0.789673	5.57457	1.38736e-05	0.000456107
Smp_150300.3	0.676211	6.32996	1.41166e-05	0.000462969
Smp_186670.1	0.397571	6.39555	1.42207e-05	0.000465254
Smp_163570.2	-0.626439	9.53218	1.42835e-05	0.000466179
Smp_346880.1	-0.824042	4.26337	1.43777e-05	0.000468124
Smp_316340.4	0.578578	5.49524	1.45767e-05	0.000472432
Smp_121660.1	-0.280351	6.56613	1.45799e-05	0.000472432
Smp_157670.1	-0.931797	5.77872	1.4729e-05	0.000476119
Smp_245170.1	0.606593	4.25757	1.4846e-05	0.000477456
Smp_172110.1	0.446553	8.69477	1.48563e-05	0.000477456
Smp_089700.1	-0.273846	9.02398	1.48763e-05	0.000477456
Smp_244950.1	0.336179	7.11511	1.51297e-05	0.000484438
Smp_018870.1	-0.548993	4.37444	1.51658e-05	0.000484447
Smp_146430.2	0.546668	6.1558	1.5216e-05	0.000484611
Smp_322590.1	0.932125	3.26744	1.52427e-05	0.000484611
Smp_140590.2	1.02626	4.64933	1.5473e-05	0.000489649
Smp_123540.1	1.15142	4.41903	1.54737e-05	0.000489649
Smp_032950.1	0.498875	7.43199	1.56301e-05	0.000492099
Smp_301730.1	-0.380326	6.55595	1.56467e-05	0.000492099
Smp_049550.1	0.670769	10.6927	1.5696e-05	0.000492099
Smp_028650.2	-0.445905	5.60979	1.56968e-05	0.000492099
Smp_011270.2	0.875975	7.12785	1.57726e-05	0.000493331
Smp_045550.1	0.541776	7.86002	1.58754e-05	0.000495399
Smp_209040.1	0.450963	8.08841	1.59777e-05	0.000497445
Smp_079760.1	-0.223624	6.88085	1.61959e-05	0.000503078
Smp_316490.2	1.77295	5.13433	1.64487e-05	0.00050976
Smp_034410.1	0.331771	9.21634	1.65311e-05	0.000511139
Smp_181490.2	-0.358004	5.14427	1.66916e-05	0.000514923
Smp_134590.1	-0.535252	4.95837	1.67367e-05	0.00051514
Smp_244000.1	-0.496096	4.47783	1.68949e-05	0.000518827
Smp_169470.1	0.311536	6.71749	1.71242e-05	0.000524676
Smp_157930.1	-0.536482	5.85712	1.72503e-05	0.000527343
SmLINC122520-IBu	0.809488	5.2524	1.7322e-05	0.00052834
Smp_081430.1	-0.603691	7.80909	1.75631e-05	0.000534324
Smp_244150.1	-0.650335	3.79634	1.75973e-05	0.000534324
Smp_157540.1	-0.31382	6.41716	1.80235e-05	0.000546039
Smp_305800.3	-1.32866	9.74864	1.80809e-05	0.000546553
Smp_303250.1	0.669363	6.71498	1.82775e-05	0.000551261
Smp_170170.1	-0.229404	7.56178	1.83991e-05	0.000552739
Smp_068170.1	-0.261714	7.48939	1.84083e-05	0.000552739
Smp_054300.1	-1.68935	2.76377	1.8684e-05	0.000559274
Smp_307450.1	2.47767	6.05786	1.87087e-05	0.000559274
Smp_346890.1	0.280609	7.39705	1.87849e-05	0.000560313
Smp_053560.1	0.478555	5.98772	1.88273e-05	0.000560323
Smp_180350.2	-1.04798	2.70468	1.88682e-05	0.000560323
Smp_089240.1	0.283567	6.6521	1.91787e-05	0.000568297
Smp_179810.2	-0.322097	9.1707	1.93386e-05	0.000571779
Smp_105710.1	-0.23771	6.52593	1.94918e-05	0.00057505
Smp_244610.1	1.11482	5.30291	1.96284e-05	0.000576708
Smp_175910.1	-0.300643	6.67529	1.96333e-05	0.000576708
Smp_063640.1	-0.317802	8.43017	1.97669e-05	0.000577971
Smp_302860.1	0.411478	6.43325	1.97727e-05	0.000577971
Smp_045220.1	-0.497452	9.77096	1.98046e-05	0.000577971
Smp_094190.1	0.376299	6.74854	1.98937e-05	0.000578164
Smp_175580.1	-0.507008	4.60277	1.99398e-05	0.000578164
Smp_174670.2	0.376475	6.81201	1.99603e-05	0.000578164
Smp_104330.1	-0.353012	6.79456	1.99824e-05	0.000578164
Smp_044560.1	0.47209	6.36474	2.00538e-05	0.000578807
Smp_210300.1	0.674488	6.09789	2.01325e-05	0.000578807
Smp_042400.1	0.47958	7.29812	2.01332e-05	0.000578807
Smp_010820.1	-0.716083	7.12027	2.04028e-05	0.000585312
SmLNCA111139-IBu	4.24582	0.077369	2.08615e-05	0.000597206
Smp_170200.1	0.812105	5.2894	2.10032e-05	0.000599989
Smp_008620.1	0.283182	5.85666	2.10536e-05	0.00060016
Smp_312630.1	0.599859	6.15239	2.12599e-05	0.000603885
Smp_033530.1	-0.567488	8.57735	2.12909e-05	0.000603885
Smp_024490.1	0.369877	6.42803	2.13183e-05	0.000603885
Smp_011680.1	0.834243	6.95029	2.13771e-05	0.000604283
Smp_141360.1	-0.511906	7.05863	2.16352e-05	0.000610303
Smp_129310.2	0.983221	5.55222	2.1929e-05	0.000617301
Smp_320340.1	-0.660942	6.82723	2.19896e-05	0.000617573
Smp_203410.1	-0.927337	2.80659	2.20301e-05	0.000617573
Smp_180240.1	-0.399309	8.24778	2.2181e-05	0.000620518
Smp_024110.2	-0.388716	7.72231	2.27644e-05	0.000634727
Smp_320270.2	-0.714281	5.51043	2.28223e-05	0.000634727
Smp_312460.1	-0.783585	11.4819	2.28299e-05	0.000634727
Smp_137300.1	-1.53206	2.29732	2.29245e-05	0.000635311
Smp_210500.1	0.325269	9.68098	2.29449e-05	0.000635311
Smp_152270.1	-0.533134	6.6614	2.32814e-05	0.000643309
Smp_331870.1	-0.348841	7.53724	2.34811e-05	0.000647376
Smp_333100.1	-0.278062	7.42125	2.35254e-05	0.000647376
Smp_065610.1	-0.337374	11.0707	2.35723e-05	0.000647376
Smp_130250.1	0.346634	5.36243	2.36676e-05	0.00064847
Smp_332150.1	1.91346	1.36917	2.37081e-05	0.00064847
Smp_088920.2	-0.626404	3.76955	2.3774e-05	0.000648959
Smp_245600.1	0.710044	4.37125	2.40674e-05	0.000655306
Smp_161080.2	0.499417	6.6598	2.41035e-05	0.000655306
Smp_345280.1	0.816447	5.94436	2.42725e-05	0.000658574
Smp_024500.1	-0.273156	6.56397	2.43295e-05	0.000658668
Smp_014290.2	-0.3645	6.43262	2.44012e-05	0.000658668
Smp_008360.1	0.752048	6.33701	2.44222e-05	0.000658668
Smp_243670.1	-0.320492	5.81905	2.47652e-05	0.000666588
Smp_056970.3	-0.380634	7.33056	2.48791e-05	0.000668324
Smp_179360.1	0.298373	8.2022	2.50292e-05	0.000671021
Smp_092020.3	0.827985	3.97743	2.5091e-05	0.000671346
Smp_056970.2	-0.35948	12.6483	2.51752e-05	0.000672268
Smp_144570.1	-0.334459	6.22446	2.53348e-05	0.000674672
Smp_131400.1	0.266032	7.13404	2.53651e-05	0.000674672
Smp_341570.1	0.483686	5.72316	2.553e-05	0.000676696
SmLINC119396-IBu	-2.0213	0.128044	2.55413e-05	0.000676696
Smp_146840.1	-0.645885	4.81867	2.56842e-05	0.000679149
Smp_246550.1	0.541225	5.70663	2.57368e-05	0.00067921
Smp_181160.1	0.981981	4.48937	2.5826e-05	0.000680237
Smp_091820.1	0.547002	8.49711	2.5918e-05	0.000681331
Smp_307450.2	2.28092	6.30501	2.60373e-05	0.000683137
Smp_045960.1	-0.206815	7.54203	2.6202e-05	0.000684588
Smp_055870.1	0.36534	8.53673	2.62029e-05	0.000684588
Smp_180680.1	-0.489841	4.49556	2.62446e-05	0.000684588
Smp_130580.1	0.374173	7.46384	2.63741e-05	0.000686641
Smp_096760.1	-0.350689	9.98208	2.66051e-05	0.000691323
Smp_018020.1	-0.320835	7.10554	2.66681e-05	0.00069163
Smp_161210.1	-0.345505	5.09911	2.68442e-05	0.000694864
Smp_008230.1	0.298228	6.63494	2.69895e-05	0.00069729
Smp_326750.1	-0.355402	5.88487	2.71601e-05	0.000698415
Smp_247870.1	0.447999	5.34412	2.72375e-05	0.000698415
Smp_074590.1	-0.416202	6.27152	2.72383e-05	0.000698415
Smp_174260.1	-0.669909	3.29743	2.72398e-05	0.000698415
Smp_342040.1	1.42572	3.65972	2.73648e-05	0.00070029
Smp_009070.1	-0.392131	7.2836	2.7499e-05	0.000702395
Smp_135460.2	0.482958	6.16167	2.78769e-05	0.000709812
Smp_176410.2	-0.482927	5.01313	2.78945e-05	0.000709812
Smp_136660.1	0.942204	6.00045	2.81379e-05	0.000713484
Smp_040800.1	0.289366	8.60124	2.81444e-05	0.000713484
Smp_170150.3	0.604353	5.12607	2.84288e-05	0.000719344
Smp_151220.1	-0.728745	5.2236	2.87612e-05	0.00072623
Smp_022340.1	-0.229281	8.30411	2.88084e-05	0.00072623
Smp_000100.3	-0.361705	7.09556	2.89829e-05	0.000728537
Smp_105220.1	0.698212	6.08049	2.90078e-05	0.000728537
Smp_155510.1	0.50559	6.60025	2.9228e-05	0.000730687
Smp_194090.1	0.307966	8.42229	2.92727e-05	0.000730687
Smp_319500.1	-0.356882	5.39132	2.93073e-05	0.000730687
Smp_039870.1	0.294984	6.75224	2.93428e-05	0.000730687
Smp_011700.1	0.602972	7.2876	2.93637e-05	0.000730687
Smp_145350.1	0.557323	8.15627	2.96478e-05	0.0007364
Smp_043990.1	-0.302001	8.86145	2.97693e-05	0.000738059
SmLNCA168342-IBu	-1.8181	2.36144	3.02388e-05	0.000748328
SmLNCS157154-IBu	-0.906086	2.50189	3.04661e-05	0.000752575
Smp_044970.1	-0.245938	9.37363	3.05712e-05	0.000753792
Smp_125450.1	-2.63107	-0.453477	3.06389e-05	0.000754085
Smp_174490.1	0.306349	7.03588	3.07128e-05	0.000754529
Smp_310160.1	-0.449524	9.94907	3.13733e-05	0.000768836
Smp_169260.3	-0.762771	7.16477	3.14089e-05	0.000768836
Smp_157100.3	1.68349	2.81034	3.25364e-05	0.000794994
Smp_082810.1	-0.340658	8.52444	3.26698e-05	0.000796812
Smp_079970.1	-1.32539	1.59335	3.27472e-05	0.000797261
SmLINC146956-IBu	0.998254	2.81669	3.287e-05	0.000797967
Smp_303950.1	0.387356	5.5607	3.28943e-05	0.000797967
Smp_083020.3	0.677523	4.30157	3.35636e-05	0.000812744
Smp_062790.1	-0.264016	7.12893	3.36741e-05	0.000813961
Smp_047870.1	0.4831	6.46194	3.38242e-05	0.000816129
Smp_245370.1	0.449035	6.98376	3.39569e-05	0.000817871
Smp_015630.1	-0.532333	4.20955	3.42043e-05	0.000822363
Smp_061230.1	-0.394842	8.65963	3.45903e-05	0.000830168
Smp_129060.1	-0.367392	6.93451	3.49591e-05	0.000837531
Smp_900100.1	0.463723	5.51534	3.52705e-05	0.000843496
Smp_145290.1	0.848153	3.75362	3.54922e-05	0.000847297
Smp_137410.1	-0.2442	6.0795	3.57953e-05	0.000853026
Smp_012440.1	-0.255078	9.22046	3.60612e-05	0.00085785
Smp_045260.1	-0.396183	6.8435	3.61705e-05	0.000858939
Smp_000510.1	-0.270396	5.67175	3.65729e-05	0.000866969
Smp_210780.1	0.290585	7.97577	3.70667e-05	0.00087597
SmLNCA168250-IBu	3.44294	-0.581004	3.70822e-05	0.00087597
Smp_105040.1	-0.464768	6.14925	3.72469e-05	0.000878325
Smp_074560.3	1.50542	6.60902	3.8016e-05	0.000892638
Smp_049580.1	-0.454174	7.25076	3.80229e-05	0.000892638
Smp_149740.1	-0.298632	7.13146	3.80521e-05	0.000892638
SmLNCA143200-IBu	2.26064	0.0970705	3.84586e-05	0.000900611
Smp_212360.2	0.348026	6.16642	3.86085e-05	0.000902557
Smp_341180.1	0.493989	7.29799	3.89719e-05	0.00090791
Smp_333830.1	-1.91086	1.46702	3.96047e-05	0.000921064
Smp_154180.1	0.618096	5.64029	4.00399e-05	0.000929096
Smp_194970.1	0.684442	6.40092	4.00876e-05	0.000929096
Smp_124050.2	1.60898	7.0838	4.02985e-05	0.000932385
Smp_345450.1	0.309466	6.22613	4.04051e-05	0.000933253
Smp_064150.1	0.420888	7.48315	4.18726e-05	0.000965499
Smp_343610.1	0.431522	6.89056	4.22383e-05	0.000972273
Smp_147680.1	-0.297448	8.93115	4.23126e-05	0.000972326
Smp_004710.1	-0.385419	6.14453	4.27128e-05	0.000978952
Smp_090150.1	-0.290313	6.62238	4.27458e-05	0.000978952
Smp_347270.1	0.667828	5.51642	4.29799e-05	0.000982647
Smp_337140.5	-0.291743	7.51537	4.35198e-05	0.000993311
Smp_301040.1	-0.26334	7.82433	4.36984e-05	0.000995704
Smp_027430.2	-0.72116	5.47035	4.37803e-05	0.000995892
Smp_330700.1	2.76571	-0.635752	4.41171e-05	0.00100138
Smp_248030.1	0.214252	8.22373	4.417e-05	0.00100138
Smp_053420.1	0.35291	7.93062	4.42745e-05	0.00100207
Smp_150640.1	-0.665714	8.56524	4.49306e-05	0.00101457
Smp_085780.1	-0.369162	4.58269	4.49768e-05	0.00101457
Smp_153930.1	-0.717238	4.06187	4.53812e-05	0.00102003
Smp_043570.1	0.423512	5.35249	4.54416e-05	0.00102003
Smp_154530.1	-0.24855	8.78057	4.54791e-05	0.00102003
Smp_176110.1	1.11637	6.07786	4.55666e-05	0.00102003
Smp_137580.1	-0.296213	8.03888	4.55964e-05	0.00102003
SmLINC106400-IBu	-0.795358	5.40359	4.57135e-05	0.00102003
Smp_088090.1	1.79632	3.42511	4.58044e-05	0.00102003
Smp_030370.1	0.439819	11.8142	4.58228e-05	0.00102003
Smp_320320.1	-0.803248	7.42875	4.59681e-05	0.00102158
Smp_039810.1	-0.324518	7.69589	4.61889e-05	0.0010248
Smp_125900.1	0.284355	6.44955	4.74075e-05	0.0010484
Smp_244080.1	-0.272314	6.45367	4.75625e-05	0.00105011
Smp_203580.1	0.543979	6.59452	4.7979e-05	0.00105757
Smp_306270.1	-0.269209	5.9188	4.81783e-05	0.00106024
Smp_140840.1	0.362371	6.35396	4.88692e-05	0.00107369
SmLNCA115482-IBu	1.90841	0.538415	4.94011e-05	0.0010819
Smp_128000.1	-0.48146	6.18646	4.94228e-05	0.0010819
SmLINC161895-IBu	0.86848	4.0662	4.95411e-05	0.0010819
Smp_020300.1	-0.231643	7.29474	4.95632e-05	0.0010819
Smp_131080.1	0.365342	4.85462	4.97705e-05	0.00108467
Smp_031770.1	-0.469822	9.66949	5.0207e-05	0.00109243
Smp_341260.1	-0.31592	6.56407	5.05573e-05	0.00109628
Smp_344810.1	-0.635066	6.16312	5.06053e-05	0.00109628
Smp_344620.1	-0.7496	5.47371	5.06273e-05	0.00109628
Smp_343540.4	0.251354	7.87292	5.1291e-05	0.00110887
Smp_244360.1	-0.514812	5.97437	5.14173e-05	0.00110983
Smp_072330.1	0.682013	12.0627	5.17751e-05	0.00111577
Smp_163520.1	0.837343	4.91387	5.19442e-05	0.0011173
Smp_103160.1	-0.230531	8.92537	5.20115e-05	0.0011173
SmLNCS143325-IBu	0.761143	3.35587	5.22699e-05	0.00112107
Smp_312920.1	-0.229281	7.25157	5.25837e-05	0.00112589
Smp_130950.1	-0.358558	8.35731	5.26614e-05	0.00112589
Smp_171120.1	0.355132	5.84209	5.28838e-05	0.00112886
Smp_152370.1	0.308202	7.43891	5.4087e-05	0.00115272
Smp_074040.1	0.286546	7.09833	5.53218e-05	0.00117718
Smp_155050.1	-0.347778	7.45237	5.59302e-05	0.00118729
Smp_042680.1	-0.281576	8.02422	5.5973e-05	0.00118729
Smp_057060.1	-0.463379	7.32186	5.68077e-05	0.00120096
Smp_161530.2	0.488292	5.7095	5.68536e-05	0.00120096
Smp_123620.1	0.298168	6.05644	5.69893e-05	0.00120096
Smp_072720.1	0.338373	8.53127	5.70475e-05	0.00120096
Smp_050830.1	0.821863	3.36235	5.70614e-05	0.00120096
Smp_317130.1	-0.288739	6.39651	5.75266e-05	0.00120826
Smp_164380.1	0.336313	6.18959	5.76507e-05	0.00120826
Smp_100040.1	0.277422	6.7824	5.76767e-05	0.00120826
Smp_079960.1	-1.67067	2.32573	5.79707e-05	0.00121254
Smp_141010.2	0.873311	5.80072	5.86261e-05	0.00122435
Smp_341810.1	-0.639655	4.6582	5.89215e-05	0.00122862
SmLINC137036-IBu	0.9576	2.88839	5.91377e-05	0.00122995
Smp_089460.2	-0.341846	6.9075	5.91671e-05	0.00122995
Smp_077090.1	-0.296153	7.19391	5.94082e-05	0.00123306
Smp_317210.1	-0.344291	6.48736	5.96725e-05	0.00123665
Smp_002740.1	-0.220355	6.52883	5.97642e-05	0.00123665
SmLNCS117439-IBu	0.863028	4.52321	6.15749e-05	0.00127217
Smp_171600.3	0.708991	3.61565	6.17951e-05	0.00127477
Smp_141390.1	-0.401644	6.81468	6.26483e-05	0.0012904
Smp_011990.1	0.354144	6.82329	6.27797e-05	0.00129114
Smp_164210.1	0.209789	6.5924	6.33964e-05	0.00130184
Smp_197860.1	-0.564026	8.75772	6.40301e-05	0.00131286
Smp_346360.1	-0.227719	5.97278	6.41418e-05	0.00131316
Smp_169730.1	0.36411	6.97788	6.42962e-05	0.00131433
Smp_042300.1	-0.443035	9.05731	6.45256e-05	0.00131568
Smp_067580.1	-0.256497	6.81387	6.45849e-05	0.00131568
Smp_127450.1	0.244053	7.83971	6.46547e-05	0.00131568
Smp_068500.1	-0.389148	7.49777	6.50806e-05	0.00132236
Smp_144020.1	-0.406257	4.37202	6.54979e-05	0.00132874
Smp_034840.1	-0.287795	11.0952	6.55912e-05	0.00132874
SmLNCA125303-IBu	-1.66907	1.45171	6.60112e-05	0.00133219
Smp_326120.1	-1.12947	2.16612	6.60453e-05	0.00133219
Smp_162770.1	0.711181	5.20157	6.60938e-05	0.00133219
Smp_073270.1	-0.377966	7.32131	6.61561e-05	0.00133219
Smp_306990.1	-0.407155	11.004	6.67189e-05	0.00134153
Smp_158110.1	-0.323847	8.71167	6.70965e-05	0.00134518
Smp_002920.1	0.466251	5.62743	6.71278e-05	0.00134518
Smp_044750.1	0.642	7.05896	6.71991e-05	0.00134518
Smp_073800.1	0.366004	6.52479	6.76655e-05	0.00135141
Smp_053230.1	-0.230807	9.08005	6.77106e-05	0.00135141
Smp_022400.1	-0.369016	9.7777	6.81807e-05	0.00135879
Smp_054200.1	-0.293992	6.97806	6.85706e-05	0.00136454
Smp_058450.1	0.278521	6.50903	6.91193e-05	0.00137344
Smp_156960.1	-0.639278	7.17959	6.93215e-05	0.00137544
SmLINC136992-IBu	0.71563	4.71924	6.97811e-05	0.00138137
Smp_180740.1	0.426579	7.82748	6.98844e-05	0.00138137
Smp_167160.1	0.332465	6.32051	6.99495e-05	0.00138137
Smp_138430.1	-0.221345	6.46226	7.00952e-05	0.00138137
Smp_144430.1	5.64395	3.88612	7.02103e-05	0.00138137
Smp_134800.1	0.479626	4.80553	7.02341e-05	0.00138137
Smp_126050.1	-0.449991	5.39791	7.04297e-05	0.00138321
Smp_040190.1	0.559503	7.84897	7.1318e-05	0.00139785
Smp_246160.1	-0.242526	6.58155	7.14903e-05	0.00139785
Smp_329760.2	0.35544	5.23062	7.15191e-05	0.00139785
Smp_331960.1	-0.488611	4.15777	7.15892e-05	0.00139785
Smp_035310.2	-0.260106	6.17297	7.18019e-05	0.00139796
Smp_035310.3	-0.260106	6.17297	7.18019e-05	0.00139796
Smp_335530.1	0.723161	3.09597	7.22742e-05	0.00140513
SmLINC168820-IBu	3.73978	0.447493	7.28113e-05	0.00141354
Smp_099150.1	0.496532	7.07471	7.39862e-05	0.00143429
Smp_066760.1	0.234348	9.10639	7.43086e-05	0.00143848
Smp_065370.3	0.449632	5.35478	7.47476e-05	0.00144491
Smp_340520.2	-0.524709	4.79787	7.50077e-05	0.00144786
Smp_045010.1	0.33527	5.59749	7.52784e-05	0.00145102
Smp_085290.1	0.282294	7.4659	7.56085e-05	0.0014553
Smp_167550.2	0.318104	7.24838	7.59872e-05	0.00145921
Smp_035110.1	0.287027	6.58494	7.60277e-05	0.00145921
Smp_012920.1	-1.20563	1.77799	7.62522e-05	0.00146145
SmLNCA168214-IBu	3.2808	-0.538655	7.64054e-05	0.00146231
Smp_124760.2	-1.09868	5.80959	7.65409e-05	0.00146283
Smp_196840.1	-0.557914	10.7397	7.66926e-05	0.00146366
Smp_102340.1	-0.372133	7.6564	7.72007e-05	0.00147128
Smp_066670.1	-0.26841	5.97162	7.79077e-05	0.00148266
Smp_049600.1	0.324244	7.64023	7.96108e-05	0.00151294
Smp_214180.1	0.357669	8.25995	8.00656e-05	0.00151732
Smp_003620.1	0.243811	7.31237	8.05413e-05	0.00152419
Smp_194240.1	0.582402	5.13291	8.07669e-05	0.00152632
Smp_316000.1	-0.478057	4.82952	8.11016e-05	0.00153034
Smp_141010.3	0.606908	7.74441	8.12426e-05	0.00153034
Smp_006750.2	-0.620394	6.04759	8.13848e-05	0.00153034
SmLNCS160603-IBu	0.925559	3.62589	8.14322e-05	0.00153034
Smp_090120.1	-0.458682	11.7619	8.18007e-05	0.00153281
Smp_103330.1	-0.354264	5.83327	8.1837e-05	0.00153281
Smp_093820.1	-0.278622	8.20879	8.21288e-05	0.00153281
Smp_180390.2	-0.415395	4.57753	8.2131e-05	0.00153281
Smp_180390.3	-0.415395	4.57753	8.2131e-05	0.00153281
Smp_138050.1	-0.272541	7.92614	8.28902e-05	0.00154484
Smp_169200.1	-0.437019	7.07777	8.35284e-05	0.00155459
Smp_008490.1	-0.374813	8.37625	8.37244e-05	0.00155489
SmLINC135033-IBu	2.08807	0.667522	8.37742e-05	0.00155489
Smp_014430.1	-0.739543	3.26945	8.47343e-05	0.00156899
Smp_137360.1	-3.28988	-0.0562957	8.47666e-05	0.00156899
Smp_245010.2	0.484545	5.68436	8.5064e-05	0.00157234
Smp_179350.1	0.546541	5.90504	8.68748e-05	0.00160156
Smp_212860.1	-0.420019	6.11918	8.68816e-05	0.00160156
Smp_212190.2	-0.871369	4.11749	8.7412e-05	0.00160914
Smp_122900.2	0.519825	5.63276	8.75459e-05	0.00160941
Smp_332170.1	-0.237813	5.71063	8.84346e-05	0.00162354
SmLNCA153823-IBu	1.04232	2.6755	8.97361e-05	0.0016452
Smp_175310.1	1.12205	2.75986	9.05667e-05	0.00165818
Smp_167750.1	0.355756	7.07713	9.1007e-05	0.00166399
Smp_245140.1	1.11114	2.44215	9.30603e-05	0.00169923
Smp_129260.1	0.201934	6.86401	9.40866e-05	0.00171565
SmLNCA107436-IBu	-1.05842	1.62989	9.54389e-05	0.00173797
Smp_347040.2	0.42612	5.32396	9.57983e-05	0.00174216
Smp_074140.1	0.732649	9.26094	9.74782e-05	0.00176856
Smp_201730.1	0.775751	3.8081	9.75116e-05	0.00176856
Smp_018790.1	0.596982	7.28906	9.8197e-05	0.00177622
Smp_242240.1	-0.506921	7.32057	9.84899e-05	0.00177914
Smp_266750.1	0.878588	4.28508	9.87547e-05	0.00178082
Smp_343630.1	-0.355183	6.907	9.88464e-05	0.00178082
Smp_344710.1	-0.221556	6.63044	0.000100266	0.00180398
Smp_175390.1	-0.610986	5.82763	0.00010044	0.00180471
Smp_340760.1	-0.344285	4.86339	0.000100664	0.00180634
Smp_153660.1	-0.633331	4.38036	0.000101306	0.00181544
Smp_104110.1	0.389124	5.91689	0.000101648	0.00181915
Smp_334450.1	-1.06627	4.45211	0.000102013	0.00182266
Smp_174110.1	-0.243319	5.64326	0.000102113	0.00182266
Smp_025360.1	-0.205481	7.11828	0.000102312	0.0018238
Smp_128150.1	0.233758	5.9055	0.000103709	0.00184626
Smp_042020.1	-0.644195	7.01594	0.000104459	0.00185717
SmLNCA107194-IBu	0.681023	3.4609	0.000104639	0.00185793
Smp_130890.1	-0.461293	5.77635	0.000105809	0.00187561
Smp_171580.1	-0.359648	5.56672	0.000105913	0.00187561
Smp_061510.1	-0.253232	6.29185	0.000106609	0.00188548
Smp_347790.1	-0.465708	5.74334	0.000107138	0.00189235
Smp_080420.1	0.493465	7.46644	0.000107279	0.00189236
Smp_266790.1	0.401836	5.57834	0.000107689	0.00189713
Smp_169660.1	-0.462973	5.80216	0.000108619	0.00191102
SmLNCA142258-IBu	0.907254	3.52466	0.000109083	0.00191668
Smp_073280.1	-0.366418	6.43315	0.000109263	0.00191736
Smp_080610.1	-0.264176	6.51833	0.000111071	0.00194264
Smp_204070.1	-0.316783	6.05382	0.000111146	0.00194264
Smp_146720.1	0.25785	9.00285	0.000111396	0.00194264
Smp_000100.1	-0.309055	9.29389	0.000111418	0.00194264
Smp_026190.2	-0.483588	6.54818	0.000111423	0.00194264
Smp_063180.1	0.354044	7.27672	0.000113797	0.00197924
Smp_247080.1	2.28182	0.570251	0.000113954	0.00197924
Smp_161350.1	-0.232563	6.17127	0.000114024	0.00197924
Smp_096240.1	-0.20728	7.23514	0.000114108	0.00197924
Smp_244680.1	0.245063	6.54054	0.000115209	0.00199577
Smp_165700.2	0.270694	6.27473	0.000115748	0.0020002
Smp_005260.2	-0.345896	6.19076	0.000115761	0.0020002
SmLNCA123831-IBu	-0.867741	3.15373	0.000116824	0.002016
Smp_210900.3	0.775828	3.32634	0.00011855	0.00204318
Smp_244900.1	0.297171	7.43682	0.000118862	0.00204594
Smp_311050.1	0.220092	6.76687	0.000119242	0.00204767
Smp_075640.3	-0.390124	5.77708	0.000119265	0.00204767
Smp_210250.1	0.431079	5.32994	0.000120063	0.00205875
Smp_145140.1	-0.338664	5.35131	0.00012042	0.00206224
Smp_125740.1	-0.525657	5.30858	0.000121281	0.00207436
SmLNCA149164-IBu	1.40743	0.832948	0.00012186	0.00208163
Smp_124030.1	0.41891	5.21241	0.000122097	0.00208182
Smp_307840.1	0.755069	3.63808	0.000122179	0.00208182
Smp_156740.1	0.874443	2.89666	0.00012304	0.00209384
Smp_331790.1	-0.24572	6.8887	0.000123422	0.00209771
Smp_161120.2	-0.243378	6.85056	0.000123618	0.00209819
Smp_149420.1	0.33431	6.31471	0.000123761	0.00209819
Smp_004680.1	0.357328	8.34253	0.000125487	0.00212478
Smp_138750.1	-0.529288	5.0975	0.000125875	0.00212869
Smp_307960.2	3.07946	3.42354	0.00012608	0.00212949
SmLINC112473-IBu	1.32536	1.9389	0.000126472	0.00213345
Smp_033400.2	-0.270429	7.73213	0.000128399	0.00216325
Smp_166890.1	-0.234415	5.92809	0.00012868	0.00216529
Smp_304260.1	0.595453	6.78182	0.000129478	0.00217601
Smp_213900.1	-0.529835	9.61456	0.000130642	0.00219285
Smp_147040.1	-0.786376	3.08715	0.00013097	0.00219562
Smp_145550.1	0.517577	4.17831	0.000131494	0.00220166
Smp_129110.3	0.422121	6.1861	0.0001324	0.00221358
Smp_035270.1	-0.348528	8.42608	0.000132533	0.00221358
Smp_067590.1	0.309735	5.77706	0.000133695	0.0022298
Smp_133600.1	-0.468355	7.82173	0.000133834	0.0022298
Smp_172490.1	-0.391195	5.57291	0.000134244	0.00223388
Smp_153700.1	-0.377668	8.55528	0.000135025	0.00224184
Smp_025830.1	-0.239413	6.93921	0.000135054	0.00224184
Smp_320360.1	-2.53502	0.350133	0.000135366	0.00224425
SmLINC172840-IBu	1.09202	1.77018	0.000136014	0.00224992
Smp_066410.1	-0.231569	7.95527	0.000136157	0.00224992
Smp_029670.1	0.362544	5.69528	0.000136208	0.00224992
Smp_016780.1	-0.603989	8.30702	0.000137728	0.00227192
Smp_194830.1	0.569338	7.88991	0.000137904	0.00227192
Smp_013860.1	0.54339	7.5494	0.000138044	0.00227192
Smp_005790.2	-0.416919	5.99522	0.000139466	0.00229253
Smp_165260.1	0.300606	7.40837	0.000139898	0.00229684
Smp_127830.1	0.349981	6.00795	0.000140852	0.00230971
SmLINC104006-IBu	2.26548	1.51774	0.000141409	0.00231387
Smp_127650.1	0.227639	9.02499	0.000141449	0.00231387
Smp_028670.1	0.293727	7.88545	0.000142666	0.00233096
Smp_343540.2	0.434099	5.89565	0.000143235	0.00233743
Smp_126520.1	0.18412	7.74911	0.000144074	0.00234828
Smp_308830.3	0.818333	3.17435	0.00014426	0.00234849
Smp_069770.1	-0.304912	6.82777	0.000144725	0.00235322
SmLINC130960-IBu	-2.24775	5.02317	0.000145342	0.00235976
Smp_325420.1	-0.355565	5.06906	0.000145477	0.00235976
Smp_028410.1	-0.240824	6.91821	0.000146748	0.0023761
Smp_162080.1	0.403365	6.4694	0.000146835	0.0023761
Smp_333320.1	0.354698	5.17782	0.000147112	0.00237772
Smp_312440.1	-0.614372	10.504	0.000147387	0.00237932
Smp_346630.2	1.08477	4.04445	0.000149127	0.00240167
Smp_051550.1	-0.248634	6.31191	0.000149526	0.00240522
Smp_122950.1	-1.04843	3.44705	0.000150657	0.00242055
Smp_140680.1	0.337403	8.78804	0.000152064	0.00244025
SmLNCA130666-IBu	1.27176	2.62235	0.00015258	0.00244173
Smp_123260.1	0.578058	4.50505	0.000152803	0.00244173
Smp_072380.1	-0.26503	6.7981	0.000153057	0.00244173
Smp_072380.2	-0.26503	6.7981	0.000153057	0.00244173
Smp_097020.1	0.335049	7.19986	0.00015306	0.00244173
Smp_041540.1	-0.666872	4.61361	0.000153468	0.00244484
Smp_345010.1	-0.329111	6.09412	0.000153616	0.00244484
Smp_174950.3	0.414352	3.96526	0.000154482	0.00245571
Smp_201130.1	-0.651297	3.63275	0.000154887	0.00245926
Smp_029470.1	0.923524	4.46719	0.00015651	0.0024792
Smp_005720.1	-0.264704	8.87923	0.000158076	0.00250108
Smp_121990.1	0.368463	7.30832	0.000159465	0.0025187
Smp_210470.1	0.204334	7.12783	0.000159562	0.0025187
Smp_155780.1	0.246211	7.58183	0.000159796	0.00251945
Smp_140140.1	0.600866	4.13147	0.000161856	0.00254895
Smp_149240.1	-0.425401	5.36157	0.000162696	0.00255919
Smp_343310.1	-0.512883	5.30986	0.000163232	0.00256265
Smp_154000.1	-0.232824	7.2376	0.000163295	0.00256265
Smp_162790.1	-0.223249	6.60781	0.000164298	0.0025754
Smp_064510.1	0.356339	7.12605	0.00016472	0.00257902
SmLNCA177772-IBu	0.817867	4.28351	0.000164914	0.00257907
Smp_247180.1	-0.28737	7.82538	0.000165266	0.00258159
Smp_008770.1	-0.278529	6.59502	0.000165583	0.00258355
Smp_052280.1	-0.192557	7.37979	0.000166134	0.00258755
Smp_003620.2	1.10905	1.62965	0.000166473	0.00258755
Smp_131950.1	0.195747	6.75921	0.000166507	0.00258755
Smp_161080.1	0.834559	5.49702	0.000166732	0.00258755
Smp_345740.1	-0.374856	4.91942	0.000166796	0.00258755
Smp_062070.1	-0.279223	6.47984	0.000167432	0.00259443
Smp_171820.1	0.250156	8.58391	0.000168423	0.0026068
SmLINC005909-IBu	1.39861	0.925275	0.000168969	0.00261225
Smp_169870.1	0.757388	4.99852	0.000169316	0.00261409
Smp_347830.1	-0.267367	8.94071	0.000169475	0.00261409
Smp_074450.2	-0.474786	6.97567	0.000170364	0.0026248
Smp_312450.1	-0.706544	6.25676	0.000171509	0.00263945
Smp_043350.1	-0.204533	6.02454	0.000172784	0.00265345
Smp_300570.1	0.950432	3.85182	0.000172812	0.00265345
Smp_056360.1	-0.318356	10.4665	0.000173248	0.00265441
Smp_103570.1	0.258321	6.52378	0.000173268	0.00265441
Smp_126020.1	-0.366557	6.89437	0.000173481	0.00265468
Smp_346440.1	0.339715	4.75486	0.000176592	0.00269922
Smp_345710.1	0.20613	6.77644	0.000177133	0.00270442
Smp_011010.1	-0.251867	5.84178	0.000177585	0.00270827
Smp_061870.1	-0.307852	7.93772	0.000178657	0.00272154
Smp_137940.1	-0.446077	5.77392	0.0001794	0.00272979
Smp_054540.1	-0.18213	8.12279	0.000179636	0.00273031
Smp_033970.1	-0.222924	6.53802	0.000180146	0.00273498
Smp_083740.1	0.332829	6.69669	0.000180803	0.00274187
Smp_086030.1	-0.166614	7.15271	0.000181152	0.00274326
Smp_097830.2	-0.35934	8.20681	0.0001813	0.00274326
Smp_159190.1	0.255426	6.75276	0.000182324	0.00275567
Smp_131050.1	-0.43214	4.92674	0.000183577	0.0027715
Smp_321400.1	0.365163	4.76773	0.000185589	0.00279874
Smp_149700.1	-0.26361	6.53855	0.000185918	0.00280059
Smp_122900.1	0.435405	7.05684	0.00018636	0.00280412
Smp_150500.1	0.274415	7.25205	0.000186786	0.0028074
Smp_190940.1	-2.10908	0.18963	0.000187313	0.0028122
Smp_156410.1	0.466677	6.13585	0.000187661	0.00281429
Smp_029740.1	-0.346254	4.93836	0.000189308	0.00283584
Smp_210130.2	0.473407	4.85848	0.000190173	0.00284564
Smp_336250.1	-0.189137	8.99659	0.000190504	0.00284744
Smp_005880.1	-0.409801	7.39646	0.000191485	0.00285895
Smp_004470.1	-0.3161	7.61705	0.000191877	0.00285977
Smp_124070.1	-0.748816	3.37165	0.000191964	0.00285977
Smp_026630.2	-0.238971	7.0022	0.000192182	0.00285987
Smp_340650.2	0.563611	3.14514	0.000193593	0.0028777
Smp_058410.1	-0.201491	6.31269	0.000193948	0.00287897
Smp_246710.1	0.349591	5.39947	0.000194148	0.00287897
SmLINC158853-IBu	1.10164	2.13624	0.000194318	0.00287897
Smp_213080.1	0.246884	6.18258	0.000198869	0.00294317
Smp_131580.1	0.28519	8.36566	0.000199582	0.00295049
Smp_344520.1	1.92466	0.788076	0.000199909	0.00295131
Smp_331630.2	2.41408	1.43025	0.000200074	0.00295131
Smp_152000.1	0.252446	6.14705	0.000200987	0.00296154
Smp_018160.1	0.399681	5.46504	0.000201881	0.00297148
Smp_213350.1	-0.348298	6.05823	0.000204432	0.00300481
Smp_155290.3	-0.583754	4.27544	0.00020459	0.00300481
Smp_158640.1	-0.270677	5.88949	0.000207262	0.00303731
Smp_158640.2	-0.270677	5.88949	0.000207262	0.00303731
SmLNCA115007-IBu	0.6613	3.39283	0.000207478	0.00303731
SmLNCA128567-IBu	1.45417	0.240109	0.000211008	0.00308564
Smp_205270.1	-0.45192	5.30397	0.000212241	0.00309819
Smp_166610.1	0.626818	4.2158	0.000212472	0.00309819
Smp_015860.1	-0.26036	6.1756	0.000212553	0.00309819
Smp_173420.1	0.590428	4.9491	0.000213014	0.00309977
Smp_166960.1	-0.55279	6.41586	0.000213402	0.00309977
Smp_124300.1	-0.3369	6.47668	0.000213612	0.00309977
Smp_150150.1	0.51776	3.35243	0.000213761	0.00309977
Smp_078780.1	-0.189914	7.78416	0.000213809	0.00309977
Smp_332860.1	0.29522	6.76969	0.000215619	0.00312266
SmLINC157799-IBu	0.551116	4.99562	0.00021643	0.00312976
Smp_041370.1	-0.353387	6.43754	0.000216572	0.00312976
Smp_128110.1	-0.615157	3.46106	0.000217592	0.00314113
Smp_123710.2	-0.412591	6.43139	0.000218417	0.00314969
SmLINC159183-IBu	-0.254032	6.12138	0.000218777	0.00315151
Smp_085150.1	0.221046	8.0091	0.000220165	0.00316813
Smp_144130.1	-0.434099	4.68215	0.000220497	0.00316918
Smp_323640.1	-0.987101	4.00425	0.000220707	0.00316918
Smp_007450.2	-0.273988	5.79715	0.000221327	0.0031747
SmLINC117871-IBu	-1.61076	1.43769	0.000221783	0.00317787
Smp_194050.1	-0.305141	10.7351	0.000223627	0.00319822
Smp_155290.4	-1.38252	4.29046	0.000223677	0.00319822
Smp_022130.1	-0.423426	4.27998	0.000225659	0.00322316
Smp_163710.1	-0.352028	9.67704	0.000227379	0.00324286
Smp_244200.1	0.327167	5.65021	0.000227519	0.00324286
Smp_300500.1	0.73998	3.09331	0.000228609	0.00325497
SmLINC124284-IBu	1.87823	-0.111499	0.00022928	0.00326109
Smp_016250.1	-0.353336	5.70596	0.000230803	0.00327684
Smp_246690.2	-0.586357	3.63505	0.000230873	0.00327684
Smp_077720.2	-0.355662	7.84222	0.000232058	0.00329021
Smp_165070.1	-0.262134	8.24909	0.000232649	0.00329168
SmLNCA145876-IBu	-1.3695	1.44315	0.000234536	0.0033149
Smp_080920.1	0.273721	9.45433	0.000235705	0.00332795
Smp_162510.1	0.330236	5.59161	0.000236242	0.00333205
Smp_198980.1	0.362523	6.76326	0.000236603	0.00333244
Smp_133620.1	-0.223096	5.79194	0.000236763	0.00333244
Smp_244610.2	0.924022	2.49074	0.000237076	0.00333338
Smp_148200.1	-0.685675	4.12064	0.000237557	0.00333667
Smp_097620.1	-0.253951	6.55553	0.000238789	0.003347
Smp_006560.1	-0.231813	5.70252	0.000241101	0.00337142
Smp_247800.1	1.73641	-0.346216	0.000241148	0.00337142
Smp_144600.1	0.309681	6.04873	0.000241279	0.00337142
Smp_043150.1	0.228652	10.257	0.00024267	0.00338735
Smp_162910.2	0.44285	6.38075	0.000243555	0.0033962
Smp_166300.1	-0.660841	4.54107	0.000245604	0.00341854
Smp_315790.1	-0.308424	5.48075	0.000245663	0.00341854
Smp_170150.1	0.776061	4.46178	0.00024901	0.00346155
Smp_031070.2	0.587236	5.16582	0.000249377	0.00346245
Smp_022170.1	-0.236839	6.84774	0.000249587	0.00346245
Smp_150990.2	-0.750713	3.88098	0.000250724	0.00347465
Smp_153750.1	-0.28059	7.04542	0.000251683	0.00348436
Smp_324450.1	1.55788	0.939967	0.000252427	0.00349065
Smp_048880.1	-0.28223	5.68399	0.000252654	0.00349065
Smp_313450.4	0.24656	7.35863	0.000256608	0.00353805
Smp_136740.1	0.316948	5.61665	0.000258489	0.0035602
Smp_083400.1	-0.195018	7.41857	0.000258742	0.0035602
Smp_059150.1	-0.199763	7.07826	0.000259548	0.00356766
Smp_034550.1	-0.221641	8.32021	0.000259866	0.0035684
Smp_077030.1	-0.213114	7.48196	0.000261347	0.00358509
Smp_246240.1	0.763303	6.10848	0.000264438	0.00362015
Smp_051660.1	0.388378	5.87952	0.000265772	0.00363473
Smp_313330.1	-1.12693	1.78522	0.000267343	0.00365252
Smp_314250.1	-2.02305	1.66086	0.000269518	0.00367824
Smp_139340.1	-0.20333	6.62455	0.00026977	0.00367824
Smp_042110.1	-0.242597	7.01109	0.000270691	0.00368707
Smp_322580.1	-0.354815	7.65288	0.000272877	0.0037131
Smp_007300.1	-0.344576	8.82637	0.000275024	0.00373856
Smp_337100.5	-0.715608	6.39965	0.000276827	0.00375613
Smp_319520.1	-1.76964	-0.246052	0.000276872	0.00375613
Smp_041370.3	-0.304044	6.17887	0.000277698	0.00376355
Smp_024180.3	-0.963933	6.94575	0.000278736	0.00377201
Smp_171020.1	-0.419047	8.42578	0.000278881	0.00377201
Smp_041480.1	0.372767	6.7588	0.000281297	0.00379977
SmLINC164678-IBu	0.627448	2.9999	0.000281523	0.00379977
Smp_000180.1	-1.22769	2.47243	0.000281777	0.00379977
Smp_135010.1	0.209124	6.51505	0.000284146	0.0038279
Smp_154320.1	-0.221248	7.61383	0.000285271	0.00383923
Smp_331990.1	-0.424127	4.5925	0.000287874	0.0038704
Smp_031710.1	-0.257809	7.02889	0.000289006	0.00387821
Smp_105960.1	0.271302	6.22026	0.000289227	0.00387821
Smp_048940.1	0.229029	6.19625	0.000289316	0.00387821
Smp_210980.1	0.311962	5.39681	0.000289821	0.00388112
Smp_170430.1	-0.867922	3.46378	0.000290766	0.00388993
Smp_064600.1	0.382884	5.13891	0.000291242	0.00389245
Smp_311940.1	0.345076	7.16791	0.00029294	0.00390814
Smp_245870.1	-0.390651	5.86647	0.000292995	0.00390814
Smp_145400.1	0.735555	2.63957	0.000294674	0.00392666
Smp_334920.1	-2.33318	1.633	0.000298349	0.00397083
Smp_345230.1	-0.218293	7.06383	0.000298725	0.00397083
Smp_340390.1	-0.368134	6.18664	0.00029887	0.00397083
Smp_329570.1	3.38471	-0.616982	0.000299472	0.00397492
Smp_030730.1	-0.366407	11.9544	0.000300369	0.00398291
Smp_039180.1	0.166839	7.66891	0.000300826	0.00398506
Smp_332540.2	-0.650009	6.08565	0.000303572	0.00401749
Smp_102920.2	-0.347023	4.866	0.000304291	0.00402307
Smp_032150.1	0.266283	6.13998	0.000307353	0.00405958
Smp_001780.3	0.749481	4.00916	0.000308969	0.00407625
Smp_010230.1	-0.295759	7.24969	0.000309218	0.00407625
Smp_003990.1	-0.222556	9.66872	0.00030982	0.0040802
Smp_046810.1	-0.184821	6.90995	0.000311415	0.00409722
Smp_059340.2	-0.163623	8.94829	0.000312864	0.00411227
Smp_248070.1	-0.367746	6.09946	0.000314353	0.00412782
SmLNCA109741-IBu	0.525735	4.68824	0.000314818	0.00412993
Smp_021100.1	0.185982	6.39036	0.00031714	0.00415189
Smp_009600.1	-0.448725	4.65477	0.000317313	0.00415189
Smp_140510.2	0.34223	7.7621	0.000317612	0.00415189
Smp_156740.2	0.713775	3.96016	0.000317871	0.00415189
Smp_247020.1	-0.463509	8.74438	0.000318336	0.00415189
Smp_247020.2	-0.463509	8.74438	0.000318336	0.00415189
Smp_319130.1	-0.351995	5.31043	0.000320024	0.00416988
Smp_131030.1	0.203994	5.80852	0.00032056	0.00417043
Smp_081380.1	0.268291	5.75368	0.000326874	0.00424401
Smp_340190.1	0.486556	6.69256	0.000327085	0.00424401
SmLNCS138347-IBu	0.917246	2.13652	0.000327284	0.00424401
Smp_027000.1	0.288944	7.23827	0.000327971	0.00424885
Smp_347180.1	0.346307	5.76404	0.000328857	0.00425624
Smp_317220.1	0.782626	6.58538	0.000329671	0.00426269
Smp_129050.2	0.328642	6.46939	0.000329997	0.00426283
Smp_161250.1	-0.264007	7.01797	0.000331066	0.00427256
Smp_126420.1	-0.659572	5.34516	0.000333256	0.00429671
Smp_127990.1	0.928405	5.32951	0.000333911	0.00430105
Smp_012050.1	-0.547154	4.05247	0.00033572	0.00431802
Smp_346660.1	0.350458	6.37604	0.000336053	0.00431802
Smp_163420.3	0.751327	5.55661	0.000336342	0.00431802
Smp_144970.1	-0.401623	6.944	0.000337454	0.00431802
Smp_138520.2	1.25821	2.82472	0.000337601	0.00431802
Smp_125460.1	0.266772	7.58296	0.000337637	0.00431802
Smp_157300.1	-1.26105	1.27971	0.000337707	0.00431802
Smp_098550.1	-0.273103	6.15353	0.000337785	0.00431802
SmLNCA173200-IBu	-1.05823	2.07473	0.00034335	0.00438088
Smp_244400.1	-0.205475	7.14602	0.000343843	0.00438162
Smp_308440.1	0.257345	7.45447	0.000344057	0.00438162
Smp_018990.1	-0.322127	8.4105	0.000346737	0.00441159
Smp_333730.1	0.705195	3.33421	0.000350108	0.00445029
Smp_163750.1	-0.246449	5.42448	0.000350464	0.00445063
Smp_001500.1	0.331479	7.29213	0.000350816	0.00445092
Smp_057860.2	0.472959	4.83799	0.000351597	0.00445664
Smp_244030.1	-0.661294	2.94737	0.000352498	0.00445737
Smp_154610.1	-0.338173	8.1957	0.000352537	0.00445737
Smp_007330.1	0.246846	6.06002	0.000352779	0.00445737
SmLINC137034-IBu	0.902	3.39092	0.000352974	0.00445737
Smp_315730.4	-0.427035	5.85198	0.000353734	0.0044628
Smp_158560.3	-0.324789	5.19369	0.000357626	0.00450769
Smp_340570.1	0.627945	3.27348	0.000359388	0.00452568
Smp_333460.1	-0.258954	5.30186	0.000359887	0.00452748
Smp_098340.1	-1.37403	1.80143	0.000360537	0.00452748
Smp_134360.1	0.276263	6.22347	0.000361467	0.00453496
Smp_303410.1	0.83407	10.3289	0.000362249	0.00453845
Smp_134080.1	-0.557984	4.84712	0.000362417	0.00453845
Smp_181150.2	-0.433498	4.65879	0.000363647	0.00454829
Smp_243180.1	0.159277	8.40588	0.000363877	0.00454829
Smp_194610.1	-0.747839	5.6685	0.000365418	0.00456333
Smp_332970.1	0.657546	3.24882	0.000366518	0.00457284
Smp_029890.1	-0.197313	8.3794	0.00037109	0.00462562
Smp_026560.2	-0.265166	9.20561	0.000373038	0.00464561
Smp_115450.1	0.305432	5.65058	0.000374423	0.00465856
Smp_241840.1	0.222135	5.60948	0.000375314	0.00466516
Smp_333810.1	-0.171921	8.12365	0.000375644	0.00466516
Smp_052060.1	-0.236497	7.25359	0.000376267	0.00466861
Smp_027300.1	0.310598	5.5909	0.000377201	0.00467591
Smp_133580.1	-0.327194	5.06615	0.000377681	0.00467757
Smp_266800.1	-0.979493	2.52839	0.000379565	0.00468984
Smp_266800.3	-0.979493	2.52839	0.000379565	0.00468984
Smp_049330.1	0.211196	6.78588	0.000379713	0.00468984
Smp_148670.3	-0.680913	4.70126	0.000383034	0.00472653
Smp_335880.1	0.62215	2.47632	0.000384616	0.00474172
Smp_011150.1	0.4993	4.41104	0.000385383	0.0047441
SmLINC118187-IBu	-1.05212	1.66059	0.00038579	0.0047441
Smp_150890.1	0.168912	7.33144	0.000385862	0.0047441
Smp_330860.3	-1.43922	0.761134	0.000387582	0.00476092
Smp_135160.1	0.442674	5.82815	0.000390181	0.00478848
Smp_155970.1	-0.49649	4.53052	0.000392685	0.00481485
Smp_142700.2	0.386388	5.26631	0.000394108	0.0048243
Smp_336730.1	-0.217418	6.35956	0.00039417	0.0048243
Smp_004590.1	-0.450132	4.94012	0.000397475	0.00486035
Smp_153920.1	0.243566	6.10239	0.000398992	0.00487448
Smp_150200.1	-0.290415	5.53611	0.000399544	0.00487682
Smp_151060.1	0.268817	6.02705	0.000400957	0.00488578
Smp_129830.1	-0.348453	6.13417	0.000401001	0.00488578
Smp_202130.1	-0.243329	6.89732	0.000401505	0.00488751
Smp_000790.1	-0.608207	4.67869	0.000404074	0.00491424
Smp_022450.1	1.01677	6.76809	0.000404428	0.00491424
Smp_168080.1	-0.462869	5.57483	0.00040491	0.00491567
Smp_165490.1	-0.206022	8.54868	0.000407944	0.00494806
Smp_341580.1	-0.28765	6.10155	0.000408704	0.00495283
SmLNCA166575-IBu	1.1542	1.037	0.000411249	0.00497921
Smp_042990.1	0.369092	5.08235	0.000413865	0.00500192
Smp_031190.2	-0.863023	4.82213	0.000416259	0.00502636
Smp_173940.1	-0.215342	7.22151	0.000416738	0.00502765
Smp_331540.1	-1.05842	2.18813	0.000417196	0.00502869
Smp_156450.1	0.142754	7.26836	0.000421653	0.00507787
Smp_057860.1	0.813018	2.79146	0.000422951	0.00508211
SmLINC163938-IBu	1.53055	-0.100274	0.000423133	0.00508211
Smp_019280.1	-0.374644	5.38547	0.000426143	0.00511372
SmLNCA155388-IBu	1.75585	0.925466	0.000426822	0.00511732
Smp_014020.1	0.19986	5.89689	0.000428142	0.0051286
Smp_105410.1	-0.46009	7.0258	0.000429819	0.00514412
Smp_059670.1	-0.259114	6.88941	0.00043361	0.00518032
Smp_063120.1	0.309446	4.99977	0.000435435	0.00519752
Smp_344200.1	-0.17722	5.9299	0.000436326	0.00520356
Smp_316390.1	-0.340155	4.36834	0.000437318	0.0052108
Smp_045300.1	-0.331759	5.63229	0.000439049	0.00522681
Smp_201440.1	0.229213	5.8808	0.000441306	0.00524905
Smp_303640.1	-0.846135	4.97345	0.000441998	0.00524952
Smp_121600.1	0.518239	5.65177	0.000442122	0.00524952
Smp_175980.1	-0.324084	6.26366	0.000445871	0.00528938
Smp_138340.1	1.75514	-0.301112	0.000446834	0.00529616
Smp_016630.1	-0.345295	7.65599	0.000447236	0.00529627
Smp_158460.2	0.664791	2.98161	0.000449738	0.00531898
Smp_076660.1	-0.179383	7.115	0.000449941	0.00531898
Smp_347670.1	0.490674	3.96998	0.000450766	0.00532408
Smp_141890.1	0.322997	6.46575	0.000452157	0.00533119
Smp_175270.1	0.216428	5.51181	0.000453872	0.00534561
Smp_333840.2	0.986085	3.17916	0.000454171	0.00534561
Smp_022430.1	-0.360311	4.88612	0.00045558	0.00535753
Smp_340760.9	-0.346293	5.10056	0.000456661	0.00536556
Smp_267020.1	-0.176452	7.84337	0.000457246	0.00536778
Smp_029160.1	0.330797	7.28923	0.000457893	0.0053707
Smp_019340.1	-0.208681	7.08878	0.000459762	0.00538795
SmLINC133371-IBu	0.626314	5.09356	0.000460448	0.00539131
Smp_179290.1	-0.361423	5.06563	0.000461567	0.00539973
Smp_067000.3	0.45476	6.45456	0.000462604	0.00540282
Smp_030260.1	-0.384506	5.97399	0.00046263	0.00540282
Smp_151490.2	-0.933755	4.21303	0.000464726	0.00542261
Smp_025750.1	0.286064	5.95948	0.000467606	0.00545151
Smp_072450.1	-0.51262	3.26854	0.000468849	0.00546128
Smp_173210.1	0.353885	6.04956	0.000470422	0.00547489
Smp_141980.1	-0.297271	5.89322	0.000471056	0.00547754
Smp_305740.1	-0.274005	7.15447	0.000477381	0.00554632
Smp_167890.1	-0.243651	6.58634	0.000477941	0.00554806
Smp_001410.1	-0.248499	7.3457	0.000484355	0.00561769
SmLINC109949-IBu	1.43627	-0.196387	0.000485505	0.0056262
Smp_160710.1	-0.267664	6.575	0.000486449	0.00562903
Smp_007190.1	0.224686	6.36425	0.000487087	0.00562903
Smp_073560.1	-0.185752	7.46265	0.000487228	0.00562903
Smp_302910.1	-0.28559	4.69982	0.000487416	0.00562903
SmLNCA113574-IBu	0.684521	3.86432	0.000492579	0.0056838
Smp_267280.1	0.1987	7.00599	0.000494595	0.0057022
Smp_098450.3	1.31079	3.01884	0.000496347	0.00571752
Smp_158560.1	1.49982	2.74233	0.00049713	0.00572165
Smp_027870.1	0.201296	6.94021	0.000497767	0.00572411
Smp_303430.1	-0.33661	4.64466	0.000498552	0.00572715
Smp_067000.1	0.366835	7.86814	0.000499088	0.00572715
Smp_156880.1	-0.15697	7.8627	0.000499303	0.00572715
Smp_194420.1	0.310139	6.72141	0.000500584	0.0057283
Smp_040720.1	-0.344922	5.77828	0.000500818	0.0057283
Smp_047680.1	-0.735691	3.4122	0.000500998	0.0057283
SmLINC121387-IBu	-2.02074	2.19019	0.000501099	0.0057283
Smp_082030.1	-0.246842	7.84723	0.000504689	0.00576069
Smp_162550.1	-0.423157	5.99793	0.000505161	0.00576069
Smp_313300.1	1.55328	0.979746	0.000505446	0.00576069
Smp_020270.1	-0.260122	6.00522	0.000505828	0.00576069
Smp_019100.1	0.306603	7.05055	0.000506102	0.00576069
Smp_139480.1	-0.428018	3.3504	0.00050649	0.00576069
Smp_142600.3	0.395761	5.78374	0.000507407	0.00576626
Smp_309980.1	0.433208	4.23068	0.000508024	0.00576842
Smp_153170.1	0.336706	8.13629	0.000509322	0.0057783
Smp_245120.1	-0.503542	3.82425	0.000512912	0.00581415
SmLINC114752-IBu	-0.509869	3.78638	0.000515277	0.00583606
Smp_347860.1	-0.223431	5.64952	0.000516818	0.00584372
Smp_007760.1	0.989648	6.2023	0.000517924	0.00585133
Smp_125730.2	0.653159	3.54367	0.000518794	0.00585627
Smp_341230.1	0.200909	6.63899	0.00051953	0.00585967
Smp_013950.1	-0.3331	5.01479	0.000521209	0.00587371
Smp_060820.1	-0.210805	6.82292	0.000522287	0.00588095
Smp_143350.1	-0.381531	4.69791	0.000524613	0.00590222
SmLINC101519-IBu	1.30391	1.56271	0.000528551	0.00594123
Smp_030010.1	0.436293	8.07629	0.000528959	0.00594123
Smp_005160.3	-0.295423	6.85319	0.0005294	0.00594124
Smp_073790.1	0.239389	8.41297	0.000530172	0.00594497
Smp_071140.1	-0.202433	8.56466	0.00053271	0.00596516
Smp_307170.1	-0.723677	3.24033	0.000532856	0.00596516
Smp_332690.1	-0.26549	5.58758	0.000533881	0.00597169
Smp_345770.1	0.637007	4.9879	0.000539453	0.0060223
SmLINC144464-IBu	-0.315635	5.35047	0.000539743	0.0060223
Smp_074570.2	1.94848	2.46297	0.000540264	0.00602314
Smp_302370.1	0.455547	4.78187	0.000543573	0.00605151
SmLNCA106377-IBu	1.38042	2.20039	0.000543753	0.00605151
Smp_153440.1	-0.36029	5.4231	0.000544152	0.00605151
Smp_096790.2	0.274655	8.76566	0.000545824	0.00606511
Smp_127440.2	0.313071	7.20439	0.000548125	0.00608568
Smp_337130.1	-0.242542	7.84757	0.000549162	0.00609218
Smp_212940.1	-0.217722	5.90113	0.000551731	0.00611159
Smp_065060.1	-0.291151	5.86803	0.000551816	0.00611159
Smp_036630.1	0.241864	5.28341	0.000553575	0.00612605
Smp_123270.1	0.230938	9.6239	0.000554726	0.00613377
Smp_026510.1	-0.210515	6.28975	0.000558101	0.00616271
SmLINC169097-IBu	1.54095	1.39522	0.000558257	0.00616271
Smp_019990.1	0.306802	6.04362	0.000559333	0.00616956
Smp_097800.1	-0.281391	10.1441	0.000560912	0.00617777
Smp_245970.1	0.324642	5.77397	0.000560992	0.00617777
Smp_167010.1	0.224998	7.63921	0.000561671	0.00618021
Smp_041630.1	0.258258	6.3287	0.000563082	0.0061907
SmLINC106485-IBu	-0.648343	4.60305	0.000564677	0.00620318
Smp_328200.1	-0.389654	4.37592	0.000570573	0.00625456
Smp_322950.1	-0.29387	7.94669	0.000570678	0.00625456
Smp_015780.1	0.39087	4.87229	0.000571163	0.00625456
Smp_131600.1	-0.872665	3.79812	0.000571822	0.00625456
Smp_136580.4	0.157434	6.8508	0.000571892	0.00625456
Smp_323800.1	-0.845978	1.78107	0.000572131	0.00625456
Smp_347220.1	-0.926944	1.68941	0.000582698	0.00635601
Smp_323900.1	1.25889	1.04268	0.000582904	0.00635601
Smp_315780.3	-0.258445	6.81235	0.000583482	0.00635601
Smp_128530.1	0.442359	4.35184	0.000583763	0.00635601
Smp_344720.2	-0.578573	4.5053	0.0005843	0.00635673
Smp_064950.1	-0.181569	7.59261	0.000586322	0.0063736
Smp_340630.1	0.296813	10.755	0.000589078	0.00639269
Smp_165000.1	-0.21482	7.04339	0.000589386	0.00639269
Smp_179910.1	0.20501	6.58021	0.000589517	0.00639269
Smp_343710.1	-0.795335	2.49482	0.00058997	0.00639269
Smp_018250.2	-0.323407	8.86425	0.000590802	0.00639657
Smp_347640.2	0.369787	6.85226	0.000592379	0.00640851
Smp_168050.1	-0.211571	8.39026	0.000592965	0.00640971
Smp_138680.1	0.19724	7.23642	0.000596638	0.00643912
Smp_124660.1	0.191272	5.8318	0.000600029	0.00647054
Smp_143470.1	-0.23963	10.7826	0.000610235	0.00657536
Smp_160410.1	0.328349	5.36972	0.000611909	0.00658814
Smp_156240.2	-0.423562	4.83477	0.000613021	0.00659486
SmLNCA169735-IBu	-0.982701	1.47032	0.000615798	0.00661946
SmLINC176010-IBu	-1.19889	1.55794	0.000617998	0.00663487
Smp_129420.1	-0.262626	6.15281	0.000618214	0.00663487
Smp_123450.3	0.200175	6.46816	0.000622169	0.00667202
Smp_076150.3	0.295987	5.49358	0.000623747	0.00668364
Smp_031100.1	0.177998	7.29646	0.000624885	0.00669053
Smp_131250.1	0.739843	2.4178	0.000626864	0.00670641
Smp_023010.1	-0.602444	3.67758	0.000628387	0.00671738
Smp_345560.3	0.383356	4.97304	0.000629613	0.00672516
Smp_037780.1	-0.236777	7.80495	0.000632409	0.00674969
Smp_331280.1	0.374541	7.03246	0.000633257	0.00675341
Smp_333500.2	-0.259144	5.58596	0.000636111	0.00677849
Smp_153460.2	-0.378103	5.27927	0.000641561	0.00683118
Smp_179710.1	-0.801752	3.49544	0.000648492	0.00689955
Smp_006860.2	-0.977062	7.37286	0.000650331	0.00691367
Smp_021170.2	0.344814	6.5425	0.000651306	0.00691859
Smp_163810.1	0.205707	6.2782	0.000653032	0.00693148
Smp_332940.1	0.268165	5.7494	0.000654547	0.0069421
Smp_196140.1	-0.274	7.13274	0.000657225	0.0069629
Smp_204740.1	0.154228	7.29578	0.000657539	0.0069629
Smp_198530.1	-0.212137	7.45675	0.000659085	0.00697381
Smp_167550.3	0.448478	5.06136	0.000660529	0.00698362
SmLINC106413-IBu	0.483416	6.18507	0.000663549	0.00700588
Smp_142450.1	-0.254849	6.70278	0.000663672	0.00700588
Smp_332540.1	0.659255	5.94676	0.000666874	0.00703419
Smp_176090.1	0.43582	4.42754	0.000669673	0.00705821
Smp_050700.1	-0.208319	6.51528	0.000673262	0.0070905
Smp_076150.1	-0.227777	7.39312	0.000679697	0.0071527
Smp_167400.1	0.591538	3.64364	0.000684212	0.0071906
Smp_059570.1	-0.446903	4.337	0.000684363	0.0071906
Smp_129110.1	0.752966	3.66061	0.000685083	0.00719257
Smp_345100.1	2.47462	1.65456	0.00068691	0.00720083
Smp_140270.2	1.03434	2.87858	0.000687244	0.00720083
Smp_167810.1	-1.34603	0.499761	0.000687468	0.00720083
Smp_301670.1	0.224992	6.36564	0.000688935	0.00720926
Smp_342880.1	-0.52967	6.05806	0.000689352	0.00720926
Smp_305870.1	0.499857	5.28853	0.000689874	0.00720926
Smp_146060.2	0.166462	8.46135	0.000698202	0.00729065
Smp_323570.1	-0.763153	3.59188	0.000699476	0.00729268
Smp_341510.1	0.380987	6.89455	0.000701913	0.00731245
Smp_003440.1	-0.342814	6.26416	0.00070425	0.00733114
Smp_334670.1	1.72637	0.749958	0.000705029	0.0073336
Smp_139980.2	-0.264392	6.69945	0.000707253	0.00735108
Smp_016600.1	-0.41538	7.35941	0.000709938	0.00737044
Smp_307220.2	-0.370252	9.54571	0.000710207	0.00737044
Smp_333550.1	-0.174067	6.04613	0.000717024	0.00743548
Smp_025260.1	-0.292204	5.72253	0.000718997	0.00745022
Smp_181130.1	-0.406368	4.88041	0.000722281	0.00747136
Smp_141150.2	0.243889	6.51249	0.000722696	0.00747136
Smp_155050.2	-0.850696	4.69012	0.000726413	0.00750405
Smp_132410.1	-0.581173	3.02491	0.000727857	0.00751322
SmLINC145163-IBu	1.98044	-0.230363	0.000729995	0.00752954
Smp_306730.2	-0.605916	3.46727	0.000732977	0.00755453
Smp_177180.3	-0.292427	4.68873	0.000734283	0.00756222
Smp_055920.1	-0.171324	5.93074	0.000737326	0.00758777
Smp_057360.1	-0.293231	5.48571	0.000738312	0.00759214
SmLNCA138025-IBu	0.987316	3.44245	0.000741569	0.00761963
Smp_139540.1	0.23211	5.55	0.000742165	0.00761963
Smp_086860.1	-0.464324	5.2358	0.000742677	0.00761963
Smp_069960.1	0.193133	8.29369	0.000744256	0.00763004
Smp_149320.1	-0.352311	5.22906	0.000748671	0.00766948
Smp_326080.1	1.1525	2.63987	0.000752639	0.00770281
Smp_067520.2	0.470812	4.42469	0.000753065	0.00770281
Smp_336990.1	1.83848	3.34798	0.00075409	0.00770497
SmLINC149291-IBu	-1.35757	0.974806	0.000754416	0.00770497
Smp_175660.1	0.597468	6.335	0.000757616	0.00772644
Smp_003600.1	-1.2313	0.927984	0.000757662	0.00772644
Smp_169460.2	0.944671	1.76862	0.000758389	0.00772802
Smp_131250.2	0.416761	4.62297	0.000761247	0.00774592
Smp_062270.1	-0.237906	5.29417	0.000761293	0.00774592
Smp_046900.1	0.222408	5.07847	0.000762881	0.00775624
Smp_163880.1	0.196997	6.627	0.000764391	0.00776575
Smp_302090.1	-0.311779	7.43635	0.00077165	0.00783238
Smp_170380.1	-0.36321	4.48506	0.000772108	0.00783238
Smp_140550.1	-0.355203	5.55446	0.000775752	0.00786343
Smp_178360.1	0.192089	6.02627	0.00077741	0.00787433
Smp_090930.1	0.251721	6.83765	0.000781203	0.00790683
Smp_245030.1	-0.239728	6.1704	0.000788529	0.00797501
Smp_213740.1	-0.425863	4.09998	0.000790852	0.00799252
Smp_322460.1	-0.495068	4.21629	0.000795454	0.00803301
Smp_069240.1	-0.282211	6.02903	0.000796133	0.00803387
Smp_012380.1	-0.454045	5.35356	0.000797701	0.00804368
Smp_171080.1	-0.305711	5.27808	0.000802794	0.008089
Smp_310750.1	-0.362088	9.52778	0.000815466	0.00821056
Smp_124240.1	-0.616284	6.72383	0.000819918	0.00824319
SmLINC149999-IBu	4.15121	0.478172	0.000819927	0.00824319
Smp_026090.1	0.190804	6.1311	0.00082229	0.00825752
Smp_347610.1	-0.30178	8.86473	0.000822732	0.00825752
Smp_036270.2	-0.370846	6.46006	0.000823185	0.00825752
Smp_103380.1	-0.251705	5.93987	0.000825253	0.00826599
Smp_096020.1	0.22099	8.20288	0.000827475	0.00827685
Smp_174670.3	0.414821	5.466	0.000827563	0.00827685
Smp_139100.1	-0.334758	5.96647	0.000829246	0.00828282
Smp_088950.2	0.229814	7.10755	0.000829386	0.00828282
Smp_244240.1	0.769663	2.26554	0.00083093	0.00829211
Smp_135870.1	0.192984	6.93604	0.000832832	0.00830497
Smp_306800.2	-0.3413	5.65812	0.000837587	0.00834007
SmLINC166773-IBu	-1.28118	-0.151623	0.00084011	0.00835903
Smp_134250.1	0.377438	5.86704	0.000841334	0.00836505
Smp_126840.1	0.341051	7.91483	0.000842618	0.00837166
Smp_335630.1	0.257634	10.2025	0.000848757	0.00841589
Smp_012480.1	0.427178	5.71472	0.000848939	0.00841589
Smp_195190.1	0.314876	8.12479	0.000853818	0.00845309
Smp_308930.1	-0.417976	4.16314	0.000853942	0.00845309
Smp_169010.1	0.31613	6.52891	0.000856297	0.0084656
SmLINC142565-IBu	-2.03242	0.19185	0.000856459	0.0084656
Smp_033610.1	-0.240042	6.35009	0.000859623	0.00849066
Smp_174520.1	-1.82071	1.6626	0.000862248	0.00851037
Smp_166780.1	0.171665	6.23833	0.000863475	0.00851626
Smp_038680.1	-0.23712	6.03726	0.000865675	0.00853173
Smp_082360.1	0.411322	6.64193	0.000868409	0.00855244
SmLINC110539-IBu	2.85796	0.904725	0.000869509	0.00855704
Smp_092750.1	-0.24009	8.72671	0.000874457	0.00859947
Smp_006340.1	-0.248451	7.38442	0.000878399	0.00863194
Smp_134870.1	1.30494	5.81078	0.00088642	0.00870444
Smp_196090.1	-0.253239	6.96752	0.000894527	0.00876798
Smp_343410.1	-0.572635	2.80473	0.00089482	0.00876798
Smp_091360.1	0.197052	5.8932	0.000894838	0.00876798
Smp_165200.1	0.490276	4.35424	0.000897638	0.00878904
Smp_152710.1	-0.323385	8.69701	0.000900744	0.00881308
Smp_012860.1	-0.292649	5.05089	0.00090341	0.00882638
Smp_032120.2	0.348814	6.94819	0.000904607	0.00882664
Smp_027080.1	0.270384	5.89769	0.000904744	0.00882664
Smp_166600.1	0.181502	6.58026	0.00090596	0.00883213
Smp_308680.2	0.239339	6.49405	0.000909022	0.00885559
Smp_310520.1	-0.438975	4.97001	0.000913476	0.00888527
Smp_136180.1	0.161964	5.6597	0.000913745	0.00888527
Smp_055440.1	-0.507657	4.32925	0.00092001	0.00893686
Smp_127270.1	-0.478834	4.2495	0.00092838	0.00901168
Smp_341100.1	0.150469	7.15245	0.000929804	0.00901903
SmLINC137296-IBu	-1.20338	0.360606	0.000932137	0.00903518
SmLNCS107932-IBu	1.08509	0.867609	0.000935358	0.00905989
Smp_245610.1	-0.948349	3.19684	0.000938181	0.00907423
Smp_028100.1	-0.220166	8.06265	0.000939227	0.00907785
Smp_123490.1	0.255913	5.27796	0.000944458	0.00911885
Smp_214070.1	0.397387	5.64838	0.000944818	0.00911885
Smp_125870.2	0.188102	6.43893	0.000948505	0.00914789
Smp_051360.1	-0.253269	7.75308	0.00095249	0.00917977
Smp_334370.1	-0.357329	5.92167	0.000959977	0.00923875
Smp_079420.1	0.389805	6.57159	0.000961898	0.00925065
Smp_247850.1	-0.786913	6.37723	0.000963806	0.00926241
Smp_097490.1	0.272833	6.33367	0.000964976	0.00926706
Smp_121460.1	0.464866	4.74762	0.000969872	0.00930747
Smp_080210.1	0.558613	5.9581	0.000970853	0.00931027
Smp_143300.1	-0.390166	5.31906	0.000972058	0.00931521
Smp_314650.1	-0.268083	8.22415	0.000976274	0.00934236
Smp_014170.1	0.300939	9.65832	0.000977873	0.00935104
Smp_156280.1	-0.396058	3.93039	0.000979013	0.00935532
Smp_247170.1	-0.252782	9.25539	0.00098092	0.00936692
Smp_139470.2	-0.535143	4.05798	0.000981782	0.00936853
SmLNCS177461-IBu	0.53263	4.35489	0.00098293	0.00937287
Smp_080180.1	0.213338	5.54707	0.000985653	0.0093922
Smp_004190.1	-0.166674	7.54165	0.000989932	0.00942633
Smp_140860.1	-0.296687	5.93871	0.000993356	0.00944562
Smp_342080.2	-0.377032	5.98477	0.000996186	0.00946587
Smp_010100.1	-0.187919	6.58284	0.000997794	0.00947448
Smp_161450.1	-0.613887	3.9966	0.000998589	0.00947537
Smp_143490.1	-0.360143	5.31962	0.00100262	0.00950698
Smp_126670.1	0.259201	7.49599	0.00100393	0.00951262
Smp_321840.1	-1.11081	1.17695	0.00100463	0.00951262
Smp_152060.1	-0.218731	6.94563	0.00100702	0.00952863
Smp_082370.1	-0.553197	3.44445	0.00100815	0.0095326
Smp_130490.1	-0.289733	4.7699	0.00100906	0.00953459
Smp_340310.1	0.204899	6.49067	0.00101947	0.00961947
SmLINC157424-IBu	-0.869296	1.7337	0.0010229	0.00964509
Smp_005320.1	-0.284057	4.50749	0.00102376	0.0096465
Smp_213190.1	-0.188451	8.21172	0.00102481	0.00964966
Smp_069820.1	0.29392	5.56218	0.00102895	0.00968184
Smp_056390.1	-0.204961	7.64306	0.00103314	0.00971457
Smp_148650.1	0.222489	6.96242	0.0010368	0.00974221
Smp_173060.2	-0.238811	6.92805	0.00103942	0.00976003
Smp_340980.1	0.314318	5.34982	0.00104035	0.00976198
Smp_301050.2	-0.400333	4.06416	0.00104417	0.00979096
Smp_333040.1	-0.225609	6.73266	0.00104802	0.00981727
Smp_121990.3	0.626789	7.00707	0.00104842	0.00981727
Smp_142620.1	-0.305574	6.1701	0.00104971	0.00981809
Smp_309710.4	1.21986	4.79473	0.00104997	0.00981809
Smp_029240.1	-0.213329	7.99343	0.00105356	0.0098449
Smp_127920.1	-0.194977	6.72743	0.00106296	0.0099259
Smp_212830.2	0.378263	5.78583	0.00106884	0.00997384
Smp_060180.1	0.20444	6.02004	0.00107394	0.0100146
Smp_079420.2	0.506065	5.32824	0.00107477	0.0100154
Smp_246500.2	-0.785032	3.25424	0.00107751	0.010034
Smp_143060.1	-0.287515	7.30588	0.0010807	0.0100567
Smp_001780.2	0.914581	3.36367	0.00108451	0.0100853
Smp_266760.1	-0.473787	2.99838	0.00108603	0.0100925
Smp_165560.1	-0.196021	6.22436	0.00108731	0.0100974
Smp_213170.1	-0.319058	4.87018	0.00109388	0.0101509
Smp_075380.1	-1.28833	0.246953	0.00109457	0.0101509
Smp_017420.1	-0.363811	5.01716	0.00109776	0.0101702
Smp_053390.1	0.290814	8.07524	0.00109816	0.0101702
Smp_148250.1	-0.397775	6.15792	0.00110003	0.0101806
Smp_142300.1	-0.167523	6.20738	0.00110084	0.010181
Smp_021600.2	-0.707157	4.48324	0.00110599	0.0102128
Smp_245820.1	-0.281266	8.54056	0.00110636	0.0102128
Smp_124600.1	0.249855	5.99202	0.0011066	0.0102128
Smp_167280.1	-0.382086	7.23931	0.00110729	0.0102128
Smp_316660.2	-0.305051	4.76145	0.00111284	0.010257
Smp_130280.2	-0.252361	7.67145	0.00111599	0.010279
Smp_246550.2	0.359568	5.34143	0.00111859	0.0102893
Smp_153990.2	-0.236926	5.84345	0.00111863	0.0102893
Smp_300070.1	0.456802	6.85707	0.00112121	0.0103015
Smp_204730.1	0.160864	6.34043	0.00112148	0.0103015
Smp_208050.1	0.234303	5.49475	0.00112234	0.0103024
Smp_033330.1	0.173831	6.09371	0.00112429	0.0103133
Smp_144390.1	-0.238054	7.51542	0.00113119	0.0103624
Smp_017880.1	-0.364304	5.25767	0.00113263	0.0103686
Smp_090440.1	0.37215	4.81708	0.00113537	0.0103866
Smp_170450.1	-0.237497	7.19699	0.00113757	0.0103997
Smp_170350.1	-0.175846	7.23094	0.00113925	0.0104081
Smp_093710.1	-0.443501	3.04756	0.00114884	0.0104886
Smp_073620.1	-0.26518	6.95561	0.00115107	0.0105019
Smp_096480.1	-0.449838	4.84872	0.00115892	0.0105663
Smp_045930.1	-0.216816	6.73744	0.00116095	0.0105777
Smp_024870.1	-0.310831	7.33257	0.00116789	0.0106338
Smp_340490.1	0.409895	5.27594	0.00117177	0.010662
Smp_152300.1	0.38919	4.14712	0.00117724	0.0107014
Smp_145310.1	0.234464	6.00608	0.00117832	0.0107014
SmLNCA165637-IBu	3.76156	0.573412	0.00117848	0.0107014
Smp_068300.1	0.254973	5.5342	0.00117985	0.0107066
SmLNCA121262-IBu	1.11289	0.972548	0.00118174	0.0107165
Smp_316730.1	0.380782	5.79698	0.00118317	0.0107223
Smp_181250.1	-0.724112	2.21908	0.00118735	0.010753
Smp_314290.2	-0.453903	4.67741	0.00118913	0.0107619
Smp_341900.2	-0.368472	6.93657	0.00119306	0.0107903
Smp_073300.1	-0.298689	5.12861	0.00119391	0.0107907
Smp_042390.1	0.410885	5.21025	0.00120146	0.0108517
Smp_311670.2	3.03337	1.59007	0.00120537	0.0108797
Smp_304090.1	-0.317302	5.73025	0.00121167	0.0109293
Smp_213320.3	0.170409	6.33994	0.00121645	0.0109651
Smp_029160.3	0.42574	5.58802	0.00121902	0.0109736
Smp_159510.1	0.33951	5.33197	0.00122046	0.0109793
SmLNCS143326-IBu	0.759983	2.13691	0.00123301	0.0110848
Smp_093220.1	-0.302677	7.72839	0.00123642	0.0111081
Smp_076320.1	-1.22723	1.01778	0.00123791	0.011114
Smp_001000.1	-0.537193	4.94494	0.00123958	0.0111217
Smp_300920.2	0.292494	6.43987	0.00124195	0.0111355
Smp_134010.1	0.22681	6.64625	0.0012446	0.0111518
Smp_168590.1	-0.426661	5.13849	0.00124714	0.0111627
Smp_092320.2	-0.202305	6.12745	0.00124746	0.0111627
Smp_214080.1	0.19964	8.55457	0.00125137	0.0111903
Smp_096270.1	0.232652	5.50631	0.00125857	0.0112472
Smp_179930.1	0.328465	4.3823	0.00125978	0.0112506
Smp_125020.1	-0.892466	2.59036	0.00126467	0.0112868
Smp_161560.1	0.288733	5.14698	0.00126593	0.0112906
Smp_072970.1	0.27661	6.39254	0.00126683	0.0112912
Smp_167140.1	-0.964711	1.20752	0.0012691	0.011304
Smp_315780.4	0.99197	3.0821	0.00127143	0.0113112
Smp_194040.1	0.698377	2.29027	0.00127159	0.0113112
SmLNCA103437-IBu	-2.72541	1.46298	0.00127557	0.0113346
Smp_166070.1	-0.143867	7.21028	0.00128305	0.0113907
Smp_207000.1	-0.211172	6.0091	0.00128656	0.0114126
Smp_153290.1	0.268406	6.57764	0.00128722	0.0114126
Smp_318800.1	0.196725	6.49854	0.00128858	0.0114146
Smp_123640.1	-0.181555	5.86353	0.00128913	0.0114146
SmLNCS138348-IBu	1.14376	3.04934	0.00129436	0.0114446
Smp_079770.1	0.198862	10.5003	0.00129506	0.0114446
Smp_304840.3	-0.213106	6.15671	0.00130081	0.0114633
SmLNCS173618-IBu	0.890116	4.10434	0.00130087	0.0114633
Smp_074940.1	-0.348313	5.91008	0.00130142	0.0114633
SmLINC165217-IBu	0.760401	2.90652	0.00130886	0.011515
Smp_156910.1	0.680682	5.2027	0.00130899	0.011515
Smp_123010.2	1.01646	3.98552	0.00131047	0.0115205
Smp_346250.1	-0.622857	2.44692	0.00131199	0.0115264
Smp_341610.1	-0.327884	5.29436	0.00131411	0.0115291
Smp_167200.1	-0.291196	5.74479	0.00131675	0.0115291
SmLINC155104-IBu	1.28918	0.0525456	0.00131732	0.0115291
Smp_159050.1	0.203096	7.24975	0.00131767	0.0115291
Smp_067400.1	-0.186623	6.56664	0.00131795	0.0115291
SmLINC110226-IBu	0.899458	2.22221	0.0013185	0.0115291
Smp_131810.1	-0.220863	5.80809	0.00131925	0.0115291
Smp_083340.1	-0.191448	8.20377	0.00131997	0.0115291
Smp_127580.1	-0.224676	5.81393	0.00132487	0.0115569
Smp_175510.1	-0.271259	6.59422	0.00133867	0.0116698
Smp_004810.1	-0.157919	7.76255	0.00134239	0.0116947
Smp_014280.1	0.26944	5.04548	0.00134464	0.0117039
Smp_176540.1	-0.268052	6.8992	0.00134662	0.0117039
Smp_129050.1	0.320422	6.95081	0.00134692	0.0117039
Smp_165930.1	0.152592	8.41758	0.00135002	0.0117158
Smp_137590.1	-0.199683	7.58589	0.0013519	0.0117246
Smp_063580.1	0.171772	6.28119	0.0013546	0.0117405
Smp_132010.1	-0.836622	1.82507	0.0013562	0.0117418
Smp_123290.1	0.20211	8.59945	0.00135649	0.0117418
Smp_055770.1	0.142501	6.38833	0.00136042	0.0117648
SmLNCA165631-IBu	0.699805	2.58548	0.0013609	0.0117648
Smp_180810.1	0.215937	9.22317	0.00136428	0.0117865
Smp_011830.2	0.379834	6.89809	0.00136654	0.0117986
Smp_158560.4	0.58621	5.55715	0.00136842	0.0118072
Smp_080370.1	0.439677	8.02132	0.00137409	0.0118485
Smp_032310.1	0.195258	7.00684	0.00137987	0.0118908
Smp_124650.1	0.38522	5.00057	0.00138234	0.0119045
Smp_103920.1	0.260918	5.58725	0.00139618	0.0120097
SmLNCA101686-IBu	1.41151	0.010455	0.00139634	0.0120097
Smp_021080.1	-0.180309	6.57074	0.00140678	0.0120918
Smp_145370.1	0.222559	6.55931	0.0014124	0.0121325
Smp_168310.1	-0.39813	6.77373	0.00141638	0.0121589
Smp_178420.1	-1.26852	-0.0573219	0.00142319	0.0122037
Smp_342020.2	0.807343	4.17353	0.00142427	0.0122037
Smp_319700.1	-1.29337	0.446511	0.0014257	0.0122037
Smp_346720.1	0.140015	6.53064	0.00142571	0.0122037
Smp_333080.1	0.199984	5.41751	0.00142612	0.0122037
Smp_146760.1	1.34261	0.367299	0.0014274	0.0122041
Smp_347600.1	-0.234913	5.93874	0.00142797	0.0122041
Smp_247860.1	-1.15917	0.172472	0.00142893	0.0122046
Smp_139180.1	0.582436	2.84705	0.00143204	0.0122235
Smp_035190.3	0.318483	6.35807	0.00143502	0.0122411
Smp_152630.1	-0.695567	4.40499	0.00143769	0.0122562
SmLINC130962-IBu	-1.21707	3.96511	0.00143873	0.0122573
Smp_242500.1	0.401366	6.32464	0.00144461	0.0122997
SmLNCA139841-IBu	0.72181	2.99054	0.00144995	0.0123373
Smp_029470.2	-0.441151	3.91677	0.00145092	0.0123379
Smp_062260.1	0.201092	6.7548	0.00145527	0.012362
SmLINC113034-IBu	-0.931185	2.53891	0.00145559	0.012362
SmLNCA155678-IBu	1.80979	-0.289493	0.00145756	0.012369
Smp_129900.2	-0.368793	4.69574	0.00145824	0.012369
Smp_067000.2	0.583139	5.88047	0.00146211	0.012394
Smp_328540.1	-0.888299	1.08953	0.00146498	0.0124105
Smp_025380.1	0.494941	6.47316	0.00146834	0.0124312
Smp_305800.1	2.70715	0.423121	0.00146957	0.0124338
Smp_246290.1	0.259847	5.307	0.00147178	0.0124447
SmLINC143832-IBu	-0.578765	2.71644	0.0014752	0.0124659
Smp_337240.1	-0.972296	0.944433	0.00147974	0.0124886
Smp_162620.3	-0.226237	5.75495	0.00148129	0.0124939
Smp_303310.1	1.24269	0.426555	0.00148268	0.0124978
Smp_180570.1	-0.576056	2.86496	0.00148435	0.0125041
Smp_167190.1	0.484406	5.25676	0.0014865	0.0125144
Smp_023150.1	0.174891	6.55505	0.00148764	0.0125162
Smp_343620.1	0.313778	4.70469	0.00149235	0.012548
Smp_335890.1	-0.499856	4.39209	0.00149639	0.0125742
Smp_147370.2	-0.322134	4.35909	0.00150499	0.0126372
Smp_017280.1	-0.235138	8.3459	0.00150576	0.0126372
Smp_140270.1	0.591759	3.99695	0.00150825	0.0126502
Smp_194800.3	0.636467	4.67354	0.00150977	0.0126551
SmLINC151976-IBu	-1.39385	2.37384	0.00151263	0.0126633
Smp_334780.1	-0.678311	3.37286	0.00151537	0.012675
Smp_332250.3	-1.33202	0.387801	0.00151589	0.012675
Smp_004780.1	0.561626	9.75061	0.00151693	0.0126758
Smp_163300.1	-0.150097	8.12095	0.00152102	0.0127021
SmLNCA163174-IBu	0.866243	1.26157	0.00152561	0.012728
Smp_067480.2	0.61498	4.06123	0.00152601	0.012728
Smp_035470.1	0.151208	8.41806	0.00153564	0.0127847
SmLINC122899-IBu	-0.501441	4.17472	0.00153847	0.0128004
Smp_087690.1	-0.634872	2.88771	0.00153999	0.0128051
Smp_145040.1	-0.344062	4.76145	0.00154301	0.0128223
Smp_086900.1	0.135447	6.46824	0.00155173	0.0128869
Smp_343580.1	0.170659	7.33406	0.00155389	0.0128969
SmLNCA119103-IBu	1.10068	0.838562	0.00155879	0.0129217
SmLNCA115873-IBu	0.8489	1.06799	0.00156276	0.0129466
Smp_002280.1	0.14826	7.84648	0.0015703	0.0130012
Smp_196620.1	0.223191	6.28215	0.0015715	0.0130032
Smp_150320.3	-0.525967	3.18893	0.0015738	0.0130142
Smp_143460.1	-0.403367	3.79897	0.00157625	0.0130264
Smp_199050.1	0.212076	6.26957	0.00159002	0.0131323
Smp_302880.1	-0.333227	4.85102	0.00159238	0.0131437
Smp_267120.1	-0.240689	5.40185	0.0015935	0.0131449
Smp_336100.1	0.19733	6.63451	0.00159738	0.0131689
Smp_074700.1	0.275255	5.1522	0.00160282	0.0132056
Smp_342110.1	0.353207	4.44556	0.0016062	0.0132176
Smp_027920.1	-0.248236	7.01595	0.00160622	0.0132176
Smp_151010.1	0.25414	5.95231	0.00161156	0.0132534
Smp_306200.1	-0.383778	5.79499	0.00163018	0.0133903
Smp_142400.1	0.234636	5.72238	0.00163589	0.013429
Smp_127820.2	-0.38238	5.46414	0.00164946	0.0135322
Smp_064350.1	-0.161616	7.3241	0.00165202	0.0135405
Smp_032320.1	-0.298905	5.28775	0.00165247	0.0135405
Smp_150270.1	0.233606	7.11558	0.00166148	0.013606
Smp_154670.1	0.265098	5.46575	0.00166634	0.0136376
Smp_168140.1	0.397833	3.6885	0.00167041	0.0136625
SmLINC161393-IBu	0.887462	2.95032	0.00167187	0.0136663
Smp_146730.1	0.272063	5.76956	0.00167302	0.0136674
Smp_013370.1	-0.170867	6.80438	0.00167484	0.013674
Smp_158490.1	-0.572498	2.0772	0.00167899	0.0136831
Smp_347690.1	0.277812	6.53011	0.00168111	0.0136921
Smp_001780.1	0.778711	1.55504	0.00169025	0.013755
Smp_165540.1	0.161155	6.73708	0.00169087	0.013755
SmLINC162994-IBu	0.401741	3.76211	0.00169326	0.0137661
Smp_006930.2	0.180316	6.79561	0.00170533	0.0138393
Smp_152830.2	-0.313823	5.17152	0.00170909	0.0138532
Smp_266960.2	-0.603121	6.73314	0.00171172	0.0138561
Smp_212300.1	0.331084	5.0391	0.00171209	0.0138561
Smp_144470.1	-0.199871	6.32108	0.00171252	0.0138561
Smp_321050.1	-0.297403	4.26259	0.00171386	0.0138582
Smp_168670.1	-0.284012	4.40651	0.00171484	0.0138582
Smp_055190.1	-0.245058	6.111	0.0017229	0.013915
Smp_141520.1	-0.347947	5.73266	0.00172995	0.0139636
SmLINC145436-IBu	0.615624	3.30092	0.00173429	0.0139903
SmLINC111053-IBu	1.21842	1.79484	0.00173957	0.0140162
Smp_018400.1	-2.33461	1.85172	0.00174635	0.0140581
Smp_176310.1	-0.371569	5.53081	0.00174749	0.0140581
Smp_211020.1	-0.556563	6.65646	0.0017479	0.0140581
Smp_062120.1	0.288812	6.60036	0.00175332	0.0140849
Smp_201330.1	1.04929	0.558029	0.00176362	0.0141363
Smp_082850.1	0.187456	7.42759	0.0017639	0.0141363
Smp_031010.1	0.319074	5.82804	0.00177267	0.0141982
Smp_140700.1	0.143381	6.69399	0.00177913	0.0142312
Smp_160360.1	-0.905525	5.70172	0.00177957	0.0142312
Smp_246400.1	-0.315848	8.19296	0.00177996	0.0142312
Smp_097180.1	0.252426	4.76272	0.00178433	0.0142578
Smp_024660.1	-0.241499	6.40941	0.00179732	0.0143531
Smp_023250.1	0.213113	5.98716	0.00179862	0.014355
Smp_020760.2	0.609017	4.32298	0.001812	0.0144447
Smp_144490.3	-0.597393	4.71099	0.00181547	0.0144638
Smp_149230.1	-0.784963	1.72648	0.0018217	0.0145049
Smp_340270.1	-0.246767	5.15732	0.00182289	0.0145058
Smp_341560.1	-0.536081	3.4102	0.00183136	0.0145646
SmLINC127679-IBu	0.608917	2.90532	0.00183951	0.0146209
Smp_030690.1	-0.256233	7.81465	0.00186227	0.014767
Smp_155900.1	0.822884	3.61729	0.00187934	0.0148849
Smp_161160.1	0.193953	7.33172	0.00188186	0.0148907
Smp_121320.1	-0.408643	3.62587	0.00188228	0.0148907
Smp_003270.1	0.318902	5.27351	0.00188888	0.0149246
SmLINC110668-IBu	-0.569166	2.81366	0.00189155	0.0149246
Smp_346750.2	-0.177683	7.15205	0.00189256	0.0149246
Smp_173020.1	-0.297542	4.76051	0.00189367	0.0149246
SmLINC118147-IBu	1.85428	-0.262573	0.00189438	0.0149246
Smp_033600.1	0.214566	6.48669	0.00189576	0.0149246
Smp_047870.2	0.49494	4.80135	0.0018965	0.0149246
Smp_022740.1	0.641868	3.00025	0.00190633	0.0149932
Smp_105200.1	-0.233238	5.63275	0.00191054	0.015016
Smp_200520.1	0.625351	2.37447	0.00191146	0.015016
Smp_086830.1	-0.160454	5.75095	0.00191323	0.0150213
Smp_142790.1	0.681237	1.41379	0.00192857	0.0151329
Smp_335280.1	-0.359287	4.5985	0.00192986	0.0151343
Smp_169050.1	-0.398237	5.17286	0.0019346	0.0151546
Smp_152790.2	0.245898	6.09097	0.0019363	0.0151546
Smp_302800.1	-0.220274	6.09371	0.00193734	0.0151546
Smp_000660.1	-0.341279	9.832	0.00193861	0.0151546
Smp_035580.1	-0.231669	7.57897	0.00194156	0.0151644
Smp_315840.1	-0.841138	2.58915	0.00195171	0.0152261
SmLINC128606-IBu	1.34091	0.101942	0.00195437	0.0152326
Smp_022810.1	0.339794	6.41366	0.00196252	0.0152799
Smp_144660.3	-0.425741	3.93797	0.00196518	0.015287
Smp_152870.1	-0.208919	6.93691	0.00197723	0.015363
Smp_035210.1	-0.267028	9.51715	0.00197856	0.0153645
Smp_132830.1	0.81972	2.41127	0.00199644	0.0154831
Smp_135280.1	0.153058	7.53953	0.00199936	0.0154831
SmLNCA162926-IBu	1.30865	1.02248	0.00200008	0.0154831
SmLINC128226-IBu	-0.601895	2.96939	0.00200071	0.0154831
Smp_161580.1	-0.255898	5.67829	0.00201361	0.0155741
Smp_121390.1	-0.393053	4.49549	0.00202081	0.0156134
Smp_165840.1	-0.181033	7.09881	0.00202279	0.0156134
Smp_130520.1	0.190017	7.68042	0.00202316	0.0156134
Smp_059880.1	0.190191	5.25949	0.00203142	0.0156589
Smp_071000.1	-0.22407	6.51705	0.00203223	0.0156589
Smp_172420.2	0.258601	7.2671	0.00203269	0.0156589
Smp_147560.1	-0.215165	8.04527	0.00203463	0.0156649
Smp_340710.1	0.22255	4.994	0.00203607	0.015667
SmLNCA108719-IBu	1.34992	-0.527654	0.00204317	0.0157128
Smp_076630.1	0.219217	6.14898	0.00204816	0.0157422
Smp_087220.1	0.248242	5.05998	0.00205196	0.0157624
Smp_142320.1	-0.361545	5.94093	0.002058	0.0157998
Smp_304890.1	0.530331	4.75978	0.00205931	0.0158009
Smp_347620.2	-0.539757	2.72631	0.00206109	0.0158056
Smp_032770.3	0.410146	3.66462	0.00206594	0.0158338
Smp_129450.3	0.692434	1.63284	0.00207276	0.0158771
Smp_340740.1	0.69655	3.0035	0.00207554	0.0158893
Smp_027610.1	-0.244235	8.79692	0.00208194	0.0159293
Smp_335780.1	0.962019	0.852145	0.00208682	0.0159576
Smp_343150.3	0.53871	3.11591	0.00209579	0.0160152
Smp_045790.1	0.155526	6.64973	0.00209672	0.0160152
Smp_140820.2	0.188985	6.89643	0.00211115	0.0161163
Smp_028030.1	0.422183	6.35784	0.00212431	0.0161984
Smp_046890.1	0.306767	5.68973	0.00212962	0.0162298
Smp_165280.1	-0.190376	7.1728	0.00213422	0.0162557
Smp_316690.1	-0.243061	5.04904	0.00214509	0.0163292
Smp_124050.1	0.41598	8.22226	0.00214919	0.0163513
Smp_330860.4	-1.10123	0.179283	0.00215363	0.0163758
Smp_194870.1	-0.55503	5.46852	0.00215587	0.0163837
SmLINC135500-IBu	0.990097	0.427508	0.00216241	0.0164241
Smp_148800.2	-0.488445	3.91156	0.00216789	0.0164565
Smp_006060.1	0.220001	8.0522	0.00217294	0.0164855
Smp_128370.4	0.725044	1.77494	0.00217613	0.0165005
Smp_347140.5	-0.323922	4.94555	0.00218118	0.0165295
Smp_165580.1	0.323599	6.36975	0.00218499	0.0165491
Smp_346630.1	0.325055	4.45941	0.00218762	0.0165597
Smp_018610.1	-0.166819	7.3039	0.00219232	0.016586
Smp_346160.1	0.466899	4.92934	0.0021962	0.0166061
Smp_021330.1	-0.11849	6.23585	0.00219966	0.016623
Smp_052890.1	0.245101	5.70648	0.00221288	0.0167042
Smp_123200.1	-0.385608	5.54852	0.00221583	0.0167171
SmLNCS126412-IBu	0.762572	2.30348	0.00222434	0.0167578
Smp_125160.1	-0.196276	6.69201	0.00222458	0.0167578
Smp_173910.1	0.347103	4.70557	0.00222495	0.0167578
Smp_143070.1	0.154597	6.28828	0.00222972	0.0167758
Smp_164050.1	0.297153	5.23373	0.00222982	0.0167758
Smp_089870.1	-0.193058	8.12424	0.00223792	0.0168234
Smp_178410.1	0.147032	5.82911	0.00223864	0.0168234
SmLINC150961-IBu	-0.561989	4.55526	0.00224251	0.0168343
SmLINC156549-IBu	1.1834	-0.529197	0.00224348	0.0168343
Smp_103990.1	0.245042	5.9878	0.00224454	0.0168343
Smp_121190.4	0.632055	3.54845	0.00224554	0.0168343
Smp_102690.1	-0.150695	7.88385	0.00224644	0.0168343
Smp_013810.2	0.204496	6.33696	0.00224756	0.0168343
Smp_065580.1	-0.264028	7.70843	0.00224962	0.0168403
Smp_345570.1	-0.159671	7.11548	0.00225652	0.0168827
Smp_333150.1	-0.339437	5.90495	0.00226378	0.0169177
SmLINC165185-IBu	0.292432	4.94883	0.00226496	0.0169177
Smp_059130.1	-0.146155	7.50907	0.00226661	0.0169207
Smp_051420.1	0.462642	5.55039	0.00226893	0.0169286
SmLINC160005-IBu	1.02863	1.15971	0.00227308	0.0169502
Smp_344340.3	-0.223621	6.53768	0.00227591	0.016962
Smp_246540.1	0.449689	4.45427	0.00228141	0.0169843
Smp_016090.1	-0.147822	7.29954	0.00228371	0.016992
Smp_333260.1	0.269516	6.12102	0.00229867	0.0170847
Smp_145320.4	-0.562361	4.33492	0.00229996	0.0170847
SmLINC143111-IBu	2.31238	1.07412	0.00230416	0.0171065
Smp_134670.3	0.469843	7.57002	0.00230743	0.0171214
Smp_035220.2	-0.491826	3.84648	0.00231552	0.017172
Smp_134410.1	0.184878	7.14898	0.00232157	0.0172074
Smp_333910.1	0.135968	7.14375	0.00233279	0.0172716
Smp_037640.2	0.566852	4.36299	0.00234009	0.0173153
Smp_161560.4	0.328376	5.26902	0.00234232	0.0173153
Smp_000870.1	0.796656	3.04698	0.00234254	0.0173153
Smp_083240.1	-0.193043	6.68845	0.00234486	0.017323
Smp_158130.1	0.177135	6.41237	0.00235601	0.0173958
Smp_173380.1	-0.345472	6.72631	0.00237578	0.0175227
SmLNCA167637-IBu	1.16251	-0.323958	0.00239087	0.0176052
Smp_065190.1	-0.250507	5.84431	0.00239855	0.0176521
Smp_144940.1	0.336159	7.09726	0.00240218	0.0176692
Smp_006780.1	-0.212231	6.71386	0.00241217	0.017733
Smp_145680.1	0.216634	5.17818	0.00241351	0.0177332
Smp_210890.1	-0.235119	6.30783	0.00241993	0.017761
Smp_128220.1	0.160347	6.07182	0.00242741	0.0178063
SmLINC143493-IBu	0.462324	5.19899	0.00243608	0.0178505
Smp_137990.1	0.458783	2.77075	0.00244228	0.0178862
Smp_307950.2	-0.271438	4.88483	0.00245206	0.01792
Smp_125930.1	0.352422	3.89167	0.00245231	0.01792
Smp_246890.1	-0.330022	5.22212	0.00245267	0.01792
Smp_245470.1	-0.738888	2.84987	0.00245352	0.01792
Smp_049890.1	0.265848	5.12728	0.00245966	0.0179454
Smp_337190.1	0.394071	2.70922	0.00246601	0.017982
Smp_154760.4	-0.218385	8.72112	0.0024822	0.0180806
Smp_163760.3	0.654583	3.02277	0.00248575	0.0180967
Smp_040130.1	-0.236027	10.6534	0.00251047	0.0182668
Smp_191870.2	-0.525641	5.28455	0.00251301	0.0182754
Smp_210670.1	0.34162	5.26725	0.00252671	0.0183554
Smp_033250.1	-2.50014	0.580584	0.00253967	0.0184396
Smp_212200.2	0.131481	6.93348	0.00254211	0.0184474
SmLINC157422-IBu	-0.981475	2.05431	0.00256004	0.0185377
Smp_175680.1	-0.58865	3.16799	0.0025678	0.0185739
Smp_164880.1	0.124302	8.25781	0.00257094	0.0185867
Smp_154760.5	-0.173857	8.86827	0.00257584	0.0186027
Smp_106130.1	-0.244238	8.87157	0.00257592	0.0186027
Smp_132930.1	-0.230761	4.6843	0.00257728	0.0186027
Smp_244470.1	-0.175392	7.30297	0.0025972	0.0187164
Smp_333960.1	0.215774	5.60958	0.00259937	0.0187221
Smp_030920.1	-0.302199	6.69845	0.00260326	0.0187401
Smp_322560.1	-0.254622	8.84368	0.00261699	0.018819
SmLNCA156280-IBu	1.91625	0.343316	0.00262113	0.0188387
Smp_213700.1	0.233777	4.94914	0.00263135	0.0189021
Smp_010400.1	-0.22462	5.20198	0.00263454	0.0189149
Smp_061310.1	0.14629	7.37099	0.00263712	0.0189234
Smp_337400.1	1.15127	1.73651	0.00264595	0.0189767
SmLINC108438-IBu	-0.292642	5.49827	0.00264834	0.0189837
Smp_140490.1	0.176936	7.0919	0.00265218	0.0190012
Smp_346380.1	-0.299618	5.73491	0.00265362	0.0190015
Smp_007710.1	0.24969	5.89134	0.00266023	0.0190387
Smp_243680.1	-0.24465	6.40475	0.00266484	0.0190616
Smp_139100.2	-0.262242	7.60049	0.00266741	0.0190662
Smp_140770.2	-0.566551	3.40963	0.00266832	0.0190662
Smp_007970.1	-0.17516	5.77108	0.00267216	0.0190836
Smp_167950.3	-0.157966	6.4662	0.00267749	0.0191116
SmLNCA174410-IBu	-0.861647	0.688223	0.00269271	0.0192101
Smp_154560.1	-0.399352	4.04668	0.00270946	0.0193092
Smp_038700.1	-0.171617	6.99668	0.00272003	0.0193743
Smp_179590.1	0.237068	6.43696	0.00272664	0.0193907
Smp_123480.1	0.249865	5.37692	0.00272894	0.0193968
Smp_091840.1	0.179911	7.3645	0.00273041	0.0193971
Smp_172090.1	0.226742	4.90734	0.00273555	0.0194072
Smp_305560.2	-0.401988	4.47757	0.00273656	0.0194072
Smp_266840.1	-0.470564	3.9344	0.00273758	0.0194072
Smp_334120.1	1.2607	1.23151	0.00275335	0.0194884
Smp_018640.1	-0.219239	5.40821	0.00275541	0.0194927
Smp_342240.1	0.231644	5.49257	0.00276739	0.0195559
Smp_142650.1	0.308486	7.25318	0.00276865	0.0195559
Smp_143980.1	0.151162	6.74835	0.00276868	0.0195559
Smp_163640.1	-0.211494	5.11234	0.0027773	0.0196065
Smp_342890.1	-0.264647	6.40319	0.0027972	0.0197367
Smp_066740.1	-0.246855	6.32537	0.00280614	0.0197894
Smp_021340.1	0.214166	8.76591	0.00280954	0.0198031
Smp_151580.1	0.235065	4.71228	0.0028112	0.0198045
Smp_310760.1	-0.857666	1.4912	0.00282482	0.01989
Smp_148470.1	-1.01823	0.920661	0.00282814	0.0198927
Smp_043500.1	0.220009	7.00203	0.00283851	0.0199552
Smp_069130.2	0.50025	6.53296	0.00284163	0.0199668
SmLNCA119978-IBu	0.606874	2.2795	0.00285401	0.0200329
Smp_148450.1	0.164028	7.06944	0.0028621	0.0200434
Smp_329700.1	0.530187	2.39681	0.00286225	0.0200434
Smp_052350.2	0.384938	5.44589	0.0028628	0.0200434
Smp_157000.1	0.303004	5.98298	0.00286292	0.0200434
Smp_138920.1	-0.149293	6.60628	0.0028662	0.020056
Smp_198290.1	0.126717	6.90428	0.00287397	0.0200969
Smp_064650.1	0.190792	6.19515	0.00287502	0.0200969
Smp_341180.2	0.758498	4.73182	0.00287849	0.0201107
Smp_158290.1	-0.813736	2.5511	0.00288648	0.0201561
Smp_106010.1	-0.407827	4.03047	0.00288973	0.0201684
Smp_068510.1	-0.273549	6.49258	0.00289388	0.0201869
Smp_340730.1	0.137968	6.32663	0.00292584	0.0203871
Smp_090070.1	-0.246172	5.07148	0.0029271	0.0203871
Smp_039160.3	-0.515783	6.60119	0.00293814	0.0204364
Smp_347390.1	-0.231834	6.85729	0.00294088	0.0204364
Smp_343530.1	0.224937	5.04173	0.00294155	0.0204364
Smp_157350.1	0.238165	6.81694	0.00294174	0.0204364
Smp_044260.1	0.204986	5.71048	0.0029486	0.0204735
Smp_056260.1	-0.29336	4.05914	0.00296006	0.020532
SmLINC149997-IBu	-0.372616	3.67957	0.00296569	0.0205526
Smp_094420.1	-0.122427	8.45178	0.00296607	0.0205526
Smp_333520.2	-0.346654	5.33562	0.00297228	0.0205851
Smp_244940.6	-1.47173	0.318866	0.00297967	0.0206231
Smp_036250.1	-0.219813	6.16199	0.00298089	0.0206231
Smp_134960.1	-0.668338	2.89223	0.00298236	0.0206231
Smp_244800.1	0.172206	6.4802	0.00299953	0.0207313
Smp_011220.1	0.427126	4.24031	0.00300485	0.0207473
Smp_041980.1	-0.219301	8.11129	0.00300795	0.0207473
Smp_125560.1	1.28185	1.04367	0.00300799	0.0207473
Smp_148230.1	-0.229158	6.34367	0.00302036	0.0208114
SmLINC157423-IBu	-2.95232	0.916452	0.00302368	0.0208236
Smp_069760.1	-0.181844	6.67487	0.00302651	0.0208325
Smp_161850.1	-0.170907	5.75113	0.00304351	0.0209388
Smp_153140.1	-0.210941	5.23972	0.00304556	0.0209423
Smp_336350.2	0.371852	3.51838	0.00305293	0.0209823
Smp_163050.1	-0.499168	4.67293	0.00307038	0.0210808
Smp_104580.2	0.229922	5.62626	0.00307694	0.0211044
Smp_149960.1	0.137058	7.49691	0.00308012	0.0211155
Smp_075210.1	-0.26373	7.18733	0.00308782	0.0211468
Smp_244750.1	-0.410963	7.20122	0.0030924	0.0211674
Smp_154280.1	0.228134	5.0863	0.003097	0.0211845
SmLINC112559-IBu	0.590237	2.14032	0.00309817	0.0211845
Smp_077580.1	-0.486436	2.79936	0.00310042	0.0211845
Smp_196920.1	-0.342629	5.56487	0.00310117	0.0211845
Smp_345160.1	-0.230528	5.07992	0.0031166	0.0212742
Smp_341050.1	-0.176074	6.39353	0.00312921	0.0213437
Smp_171740.1	-0.3111	5.12866	0.00313836	0.0213953
SmLINC130971-IBu	-1.58595	4.09371	0.00317725	0.0216386
Smp_067520.1	0.236104	6.3057	0.00317989	0.0216457
Smp_123630.1	-0.212262	6.43561	0.00318155	0.0216461
SmLINC133211-IBu	0.671829	2.19054	0.00318474	0.0216568
Smp_303120.1	0.412736	3.58783	0.00318951	0.0216685
Smp_032500.1	-0.305351	5.34446	0.00318966	0.0216685
Smp_004420.1	1.01928	2.91863	0.0032004	0.0217283
Smp_247440.1	0.450131	3.41159	0.00320168	0.0217283
Smp_334430.1	-0.423456	4.60664	0.00320499	0.0217399
Smp_170630.1	-0.459981	8.21917	0.00320846	0.0217525
Smp_148370.1	0.109229	7.10009	0.00321784	0.0218051
Smp_323650.2	-0.788811	2.95211	0.00321986	0.0218079
Smp_070780.1	0.228852	7.69836	0.00322502	0.0218319
Smp_069900.1	0.13569	7.52263	0.00323067	0.0218592
Smp_123570.2	1.16522	2.16095	0.00324697	0.0219585
Smp_147960.1	0.195359	7.79626	0.00324898	0.0219611
Smp_160360.2	-0.524352	6.99817	0.00327711	0.0221402
Smp_333600.1	0.305012	6.40324	0.00328059	0.0221525
Smp_082740.1	0.211378	5.63657	0.00328222	0.0221525
Smp_315360.1	0.26041	4.62107	0.00328656	0.0221659
Smp_052350.3	0.467065	3.25274	0.00330263	0.0222569
SmLINC002639-IBu	-1.11972	0.242481	0.00332215	0.022355
Smp_340960.1	-0.30968	9.58087	0.00332707	0.022377
Smp_128130.1	0.224256	6.11257	0.0033348	0.0223961
Smp_129900.3	0.337909	6.13754	0.00333819	0.0223961
Smp_210450.1	-0.196168	5.17956	0.00334725	0.0224356
Smp_341930.1	-1.32297	0.119765	0.0033474	0.0224356
Smp_183710.1	0.263541	11.5749	0.00334946	0.0224382
Smp_140990.1	0.265598	7.01844	0.00335505	0.0224645
Smp_333670.1	-0.629776	2.41064	0.0033578	0.0224718
Smp_164480.1	-0.510485	2.59208	0.00336313	0.0224916
SmLNCA129582-IBu	0.833626	1.5301	0.00336408	0.0224916
Smp_243970.1	-0.798465	3.45025	0.0033711	0.0225273
Smp_342970.2	-0.178026	6.55377	0.00337456	0.0225393
Smp_085080.1	0.212747	5.86795	0.00338325	0.0225862
Smp_123100.1	0.905649	1.7311	0.0034064	0.0227161
SmLNCS129639-IBu	-1.19378	-0.0650874	0.00340695	0.0227161
Smp_212930.1	0.264744	4.56874	0.00340776	0.0227161
SmLNCA164776-IBu	-1.74651	-0.103736	0.0034169	0.0227659
Smp_119920.1	-0.219947	8.2057	0.00342506	0.0227977
Smp_341160.1	0.423837	6.23805	0.0034306	0.0228234
Smp_067510.1	0.347447	2.97493	0.00343593	0.0228476
Smp_133700.2	3.67025	-0.0982881	0.00344241	0.0228794
Smp_332380.1	-0.449161	4.4943	0.00344683	0.0228975
Smp_129820.1	0.127943	7.83574	0.00345264	0.0229202
SmLNCA173970-IBu	0.564325	2.55065	0.00345413	0.0229202
Smp_176070.1	0.138276	6.66927	0.00347467	0.0230172
Smp_156900.2	-0.202391	5.31871	0.00347595	0.0230172
Smp_006920.1	-0.120822	6.28022	0.00347676	0.0230172
Smp_204380.1	0.213199	6.04266	0.00348943	0.0230838
Smp_167550.1	0.309947	5.31776	0.00349025	0.0230838
Smp_063190.1	1.49561	-0.113342	0.00350657	0.0231804
Smp_099570.1	0.157413	6.28803	0.00351887	0.0232311
Smp_176100.2	-0.474258	3.91211	0.00352369	0.0232481
Smp_076960.1	-0.183116	6.21609	0.0035439	0.02337
Smp_076740.1	-0.21215	8.04239	0.00354627	0.0233721
Smp_125810.1	0.300917	6.32773	0.00354768	0.0233721
Smp_245450.1	-0.127561	8.34633	0.00355125	0.0233843
Smp_318200.1	-0.913222	2.85339	0.00357969	0.0235409
Smp_128480.1	0.233113	4.92612	0.00358027	0.0235409
Smp_126110.1	-0.165216	6.60937	0.00358211	0.0235416
Smp_137840.2	-0.858067	2.64641	0.00358815	0.0235584
Smp_130750.1	0.137904	7.7924	0.00359174	0.023562
Smp_163160.1	-0.338551	4.11084	0.00360182	0.0236136
Smp_000620.1	1.03855	0.143039	0.00360549	0.0236158
Smp_309110.1	0.197832	5.53937	0.00360905	0.0236158
Smp_008850.1	-0.861074	3.2084	0.00361846	0.0236653
Smp_340430.1	0.287658	5.99103	0.00362526	0.0236984
SmLINC127587-IBu	1.46006	0.468402	0.00363529	0.023741
Smp_132730.1	-0.616635	2.44469	0.0036405	0.0237635
Smp_055310.1	-0.2537	4.75164	0.00364394	0.0237745
Smp_244820.1	-0.376067	3.30721	0.00364704	0.0237776
Smp_075640.1	-0.168281	6.25844	0.00364795	0.0237776
Smp_034980.3	0.348823	5.13586	0.00366318	0.0238376
Smp_149500.1	0.158558	6.51078	0.00366418	0.0238376
Smp_127030.1	-0.368236	3.68442	0.0036711	0.0238525
Smp_005140.1	1.10777	0.314291	0.00367609	0.023869
Smp_131690.1	-0.196973	5.71774	0.00368455	0.0239025
Smp_078900.1	-0.209306	6.15707	0.00368479	0.0239025
Smp_156470.1	-0.300788	4.01046	0.00369164	0.0239355
Smp_135980.1	0.380702	4.38098	0.00371803	0.0240834
Smp_144660.2	-0.654015	2.50455	0.00372204	0.0240979
Smp_078700.1	0.244954	4.81378	0.00372611	0.0241092
Smp_096010.1	0.247106	5.87216	0.00372782	0.0241092
Smp_180370.1	-0.170839	5.77249	0.00373133	0.0241117
Smp_016510.1	0.247724	4.61472	0.00373584	0.0241178
Smp_139980.3	-0.807108	2.53926	0.00374744	0.0241521
Smp_347710.2	0.610032	1.63986	0.00374787	0.0241521
Smp_311430.1	-0.26998	4.09983	0.0037483	0.0241521
Smp_315830.1	0.33682	3.45204	0.00378699	0.0243888
Smp_082240.1	-0.232675	9.85126	0.00378864	0.0243888
Smp_126070.1	-1.03595	0.298178	0.00379196	0.0243904
Smp_246680.4	0.364512	5.2343	0.0037925	0.0243904
Smp_152430.1	-0.199311	6.46566	0.00379958	0.0244127
Smp_245800.5	0.408209	4.38011	0.00380386	0.0244137
SmLINC154271-IBu	0.751192	0.878294	0.00380436	0.0244137
Smp_067280.1	-0.165681	6.5489	0.00380515	0.0244137
Smp_148070.3	0.221709	6.17155	0.00381864	0.0244886
Smp_147790.1	-0.244336	6.9853	0.00382417	0.0245124
Smp_334190.1	0.542482	3.44894	0.00383154	0.024548
Smp_095910.1	0.133687	8.36338	0.00383372	0.0245503
SmLINC114751-IBu	-0.688849	1.83704	0.00383834	0.0245683
Smp_140520.3	0.601541	4.90954	0.0038461	0.0246063
Smp_029990.1	0.214686	6.26712	0.00386057	0.0246872
Smp_038960.1	-0.367047	6.97179	0.00387192	0.0247247
Smp_002080.1	0.288106	7.57566	0.00387737	0.0247407
Smp_332890.1	0.329406	4.07667	0.00387809	0.0247407
SmLINC173583-IBu	-0.650381	1.67941	0.00388053	0.0247445
Smp_346580.1	-1.051	-0.197267	0.00388515	0.0247546
Smp_060030.1	-0.288907	4.61309	0.0039013	0.0248107
Smp_346490.1	0.306106	3.73065	0.00390192	0.0248107
Smp_138300.1	0.378481	3.68316	0.00390584	0.024824
Smp_243900.1	-0.430098	4.49949	0.00391362	0.0248506
Smp_092810.1	-0.160884	7.16306	0.00391371	0.0248506
Smp_345490.1	0.334727	5.01974	0.00392381	0.0248913
SmLINC121389-IBu	-1.27906	2.93105	0.00396896	0.0251295
Smp_123870.1	-0.198122	6.643	0.00397089	0.0251295
Smp_038240.1	-0.305955	6.34121	0.0039842	0.0251916
SmLINC105635-IBu	-0.659177	2.09776	0.00399852	0.0252613
Smp_195060.2	1.34518	0.400261	0.00399896	0.0252613
Smp_127860.1	-0.521728	2.51568	0.00402178	0.0253817
Smp_347090.1	-0.352492	3.25976	0.00406781	0.0256494
Smp_026320.1	0.146132	6.76028	0.00406799	0.0256494
Smp_141490.1	0.694437	2.93116	0.00407028	0.0256519
SmLINC126393-IBu	1.63739	-0.100362	0.00408558	0.0257363
Smp_098560.1	-0.25826	5.33241	0.00408859	0.0257433
Smp_167630.2	-0.22239	6.75908	0.0040959	0.0257681
Smp_300080.1	0.335944	7.23004	0.00409635	0.0257681
Smp_155290.5	-1.19011	1.47083	0.00410956	0.0258392
SmLINC166001-IBu	1.65921	0.80295	0.00411919	0.0258877
[truncated: 356 more rows]

## Sheet: Table S4
Table S4. List of transcripts differentially expressed from S. mansoni adult worm couples obtained from mice 14 hours after treatment with a single, sub-lethal dose of PZQ (100 mg/kg) delivered by intraperitoneal injection at 7 weeks post-infection (PRJNA597909)
transcript_ID	log2 Fold-change	log2 CPM	p-value	FDR
Smp_342560.1	-4.24551	4.2507	1.16743e-09	1.65238e-05
Smp_311630.1	2.98538	8.19159	3.06082e-09	2.16615e-05
Smp_197540.1	-1.42464	8.12687	5.97323e-09	2.69749e-05
Smp_340930.1	-3.04157	5.50337	7.62326e-09	2.69749e-05
Smp_043220.1	-1.51588	8.73063	1.09532e-08	2.85118e-05
Smp_314250.1	-3.11614	6.87899	1.57463e-08	2.85118e-05
Smp_081900.1	1.99136	8.48634	1.76622e-08	2.85118e-05
Smp_195090.1	-2.77797	5.83258	1.91264e-08	2.85118e-05
Smp_076320.1	-3.94435	5.3844	1.98403e-08	2.85118e-05
Smp_086480.1	-1.73185	8.5515	2.20886e-08	2.85118e-05
Smp_340060.1	2.24684	10.2033	2.21584e-08	2.85118e-05
Smp_101290.2	-2.08231	7.47649	2.97118e-08	3.50451e-05
Smp_248100.2	-2.29851	5.60768	3.48767e-08	3.79727e-05
Smp_000950.1	-4.04174	3.22854	4.12345e-08	3.99732e-05
SmLNCA146832-IBu	-4.66406	3.52577	4.5662e-08	3.99732e-05
Smp_309090.1	-2.50141	9.30272	4.74758e-08	3.99732e-05
Smp_165360.1	-2.72075	7.50196	4.80108e-08	3.99732e-05
Smp_307450.3	2.35988	8.53906	5.58947e-08	4.39518e-05
Smp_072210.1	1.15001	6.66099	6.13202e-08	4.56803e-05
Smp_311670.1	4.81243	10.52	7.6258e-08	5.11466e-05
Smp_334510.1	0.979903	7.71464	7.94793e-08	5.11466e-05
Smp_008660.2	2.8338	11.1651	8.20328e-08	5.11466e-05
Smp_033250.1	-3.55562	7.94968	8.64441e-08	5.11466e-05
Smp_313560.1	1.13291	10.2897	8.67259e-08	5.11466e-05
Smp_241610.1	-2.559	11.4964	1.06035e-07	6.00331e-05
Smp_246030.1	-1.70992	5.40585	1.29103e-07	6.94413e-05
Smp_341290.1	3.58119	6.18584	1.36995e-07	6.94413e-05
Smp_244960.1	2.83148	5.3278	1.3868e-07	6.94413e-05
Smp_136150.1	-2.15362	4.89301	1.44208e-07	6.94413e-05
Smp_067480.1	1.58327	8.23933	1.47184e-07	6.94413e-05
Smp_058380.1	2.04366	5.79822	1.58808e-07	6.97189e-05
Smp_133600.1	-0.733801	7.84236	1.60175e-07	6.97189e-05
Smp_011000.1	1.25666	5.84856	1.64197e-07	6.97189e-05
Smp_128370.1	1.45892	7.98521	1.67475e-07	6.97189e-05
Smp_324210.1	3.86464	3.48597	1.92246e-07	7.77442e-05
SmLNCA153794-IBu	-2.85978	4.98204	2.35172e-07	9.19851e-05
Smp_065530.1	-2.26246	3.86288	2.40458e-07	9.19851e-05
Smp_156340.2	-1.37321	5.36741	2.84242e-07	0.000105873
Smp_166340.1	1.33888	8.04841	3.11308e-07	0.000112981
Smp_083770.1	-1.61839	4.68771	3.34876e-07	0.000116899
Smp_105220.1	1.3162	6.90419	3.38622e-07	0.000116899
Smp_078750.1	-0.805803	8.73702	3.47047e-07	0.000116955
Smp_016780.1	-1.43197	7.89635	3.6691e-07	0.000118331
Smp_083410.1	-0.71391	9.23443	3.6785e-07	0.000118331
Smp_176110.1	2.24206	6.88485	3.80811e-07	0.000119778
Smp_134390.1	1.45729	5.66133	4.18413e-07	0.000125099
Smp_150300.3	0.829615	6.56353	4.23143e-07	0.000125099
Smp_169730.1	1.21293	6.67889	4.24244e-07	0.000125099
Smp_160160.1	-1.83104	4.98005	4.53039e-07	0.000130863
Smp_140140.1	0.996307	5.7561	4.73978e-07	0.000134174
Smp_311640.1	2.16354	5.84123	4.95934e-07	0.000137636
Smp_052230.1	1.64747	5.78274	5.20313e-07	0.000141625
Smp_340120.1	-0.870297	6.46631	5.3814e-07	0.000143714
Smp_306850.1	-3.6947	4.72056	5.56498e-07	0.000144546
Smp_324380.1	-1.83182	4.17126	5.61681e-07	0.000144546
Smp_055260.1	-2.22358	4.38473	6.02249e-07	0.000152218
Smp_242800.1	0.817949	6.93516	6.37741e-07	0.000154165
Smp_024390.1	-0.805637	7.02332	6.43725e-07	0.000154165
Smp_310040.1	-2.59393	3.87726	6.49676e-07	0.000154165
Smp_158520.2	-1.56789	5.98702	6.53519e-07	0.000154165
Smp_310180.1	0.927355	8.16924	6.64421e-07	0.000154168
Smp_302340.1	4.67549	8.6773	7.04514e-07	0.000157298
Smp_074140.1	1.37795	9.69284	7.09811e-07	0.000157298
Smp_129310.2	1.89923	6.1683	7.13806e-07	0.000157298
Smp_244750.1	-1.06815	7.3554	7.22367e-07	0.000157298
Smp_315740.3	-0.781377	6.4255	7.51213e-07	0.000161101
Smp_071380.1	0.956794	8.45649	7.98121e-07	0.000165916
Smp_137360.1	-3.3273	2.61521	8.00258e-07	0.000165916
Smp_194050.1	-0.724563	10.2206	8.08832e-07	0.000165916
Smp_029500.1	-0.655286	8.58097	8.25866e-07	0.000166977
Smp_041540.1	-1.00086	6.66854	8.39079e-07	0.000166977
Smp_205760.1	-1.05389	7.4083	8.49393e-07	0.000166977
Smp_332940.1	-0.826563	6.58989	9.01168e-07	0.000174486
Smp_121950.1	-1.39139	8.04695	9.12247e-07	0.000174486
Smp_332850.1	1.18098	6.62854	9.64916e-07	0.00018052
Smp_147070.1	-2.04719	5.78684	9.69303e-07	0.00018052
Smp_341790.1	2.75059	3.5783	9.85768e-07	0.000181202
Smp_147420.1	1.89533	6.83646	1.00137e-06	0.000181711
Smp_038870.1	-0.638971	7.35696	1.03622e-06	0.000184278
Smp_214370.1	-0.798712	6.52867	1.04695e-06	0.000184278
Smp_135770.1	0.824675	6.77097	1.06471e-06	0.000184278
Smp_181470.1	1.20574	7.22421	1.07705e-06	0.000184278
Smp_080420.1	0.874709	7.67298	1.09239e-06	0.000184278
Smp_071610.1	-0.595183	8.34744	1.09364e-06	0.000184278
Smp_089200.1	-1.43059	6.37111	1.11051e-06	0.00018492
Smp_064430.1	-0.92679	6.392	1.13037e-06	0.000186037
Smp_203630.3	0.711497	7.661	1.17028e-06	0.000190172
Smp_246040.1	-1.5191	6.18458	1.18236e-06	0.000190172
Smp_022450.1	2.05134	6.59747	1.2683e-06	0.000201703
Smp_056200.1	-0.618164	7.03904	1.3308e-06	0.00020929
Smp_139720.1	-0.765974	7.61573	1.40716e-06	0.000218867
Smp_153990.2	-1.36938	6.23313	1.47858e-06	0.000226307
Smp_136710.1	-1.24519	7.9774	1.48697e-06	0.000226307
Smp_246400.1	-1.05935	8.96899	1.51263e-06	0.000227763
Smp_032950.1	1.49995	7.80979	1.56925e-06	0.000233802
Smp_033870.1	-0.708536	7.20434	1.61534e-06	0.000238161
Smp_128480.1	-0.812081	6.30674	1.65668e-06	0.000241738
Smp_000420.1	-1.79476	9.59232	1.71969e-06	0.000248373
Smp_329430.1	-1.76326	4.76561	1.75567e-06	0.000251008
Smp_008660.1	2.33065	7.78326	1.80433e-06	0.000255385
Smp_335140.1	5.07593	2.80952	1.86355e-06	0.000258888
Smp_311660.1	4.01476	8.95592	1.87027e-06	0.000258888
SmLINC114092-IBu	-4.05994	3.0969	1.88395e-06	0.000258888
Smp_025830.1	-0.588445	8.02177	1.92732e-06	0.000262301
Smp_212190.1	-0.583048	7.21236	1.97359e-06	0.00026604
SmLINC134838-IBu	-2.67964	2.49572	2.003e-06	0.000267458
Smp_302320.1	4.36638	6.64912	2.04398e-06	0.000270378
Smp_011700.1	1.03989	6.98822	2.09494e-06	0.000274554
Smp_086860.1	-0.841346	5.37974	2.11821e-06	0.000275056
Smp_340490.1	1.7009	6.36295	2.16634e-06	0.000276595
Smp_169610.1	0.79707	7.09831	2.16914e-06	0.000276595
Smp_007670.1	-1.24174	4.55812	2.28996e-06	0.000283171
Smp_333310.1	-0.648342	8.37366	2.29008e-06	0.000283171
Smp_310050.1	-3.06376	4.01469	2.30227e-06	0.000283171
Smp_316140.1	-2.01095	12.725	2.34882e-06	0.000283171
Smp_340010.1	-2.64755	8.33979	2.35285e-06	0.000283171
Smp_344370.1	-0.616468	6.05952	2.38275e-06	0.000283171
Smp_147470.1	0.836147	7.52011	2.38892e-06	0.000283171
Smp_006760.1	-1.41663	4.72475	2.39302e-06	0.000283171
Smp_011870.1	-1.92739	3.96177	2.40365e-06	0.000283171
Smp_332730.1	-0.72801	8.04616	2.42078e-06	0.000283171
Smp_148390.1	-1.77951	4.82781	2.4676e-06	0.000284083
Smp_050270.1	-2.0095	8.34439	2.46871e-06	0.000284083
Smp_063330.1	0.963571	9.42967	2.49312e-06	0.000284578
Smp_000660.1	-0.805245	9.84502	2.58207e-06	0.000292373
Smp_343610.1	0.759404	6.97394	2.65223e-06	0.0002972
Smp_038100.1	-0.745881	9.65195	2.6667e-06	0.0002972
Smp_319550.1	-1.72759	3.51558	2.68941e-06	0.000297389
Smp_066940.1	-0.557074	7.11509	2.81164e-06	0.000306299
Smp_064750.2	-0.653877	6.74291	2.82653e-06	0.000306299
Smp_157950.1	-0.894946	5.01949	2.85559e-06	0.000306299
Smp_175090.1	-1.21116	8.60551	2.85654e-06	0.000306299
Smp_169050.1	-0.878837	5.52884	2.90577e-06	0.000309235
Smp_309710.4	2.6629	6.12959	2.98057e-06	0.000314828
Smp_087250.1	-0.939726	8.40344	3.00762e-06	0.000315333
Smp_341410.1	-1.31617	5.01134	3.04211e-06	0.000316603
Smp_152940.2	0.669976	5.75696	3.1168e-06	0.000318444
Smp_030690.1	-0.554986	7.81932	3.13863e-06	0.000318444
Smp_169090.1	1.85645	6.77624	3.14718e-06	0.000318444
SmLNCA144025-IBu	-4.51018	1.576	3.16509e-06	0.000318444
Smp_127440.1	0.666747	6.3628	3.17229e-06	0.000318444
Smp_201730.1	1.6607	4.48792	3.31434e-06	0.000325132
Smp_010370.1	2.28405	7.76243	3.35357e-06	0.000325132
Smp_321090.1	-2.55896	7.29787	3.37371e-06	0.000325132
Smp_010710.1	-0.528343	7.46371	3.41296e-06	0.000325132
Smp_101450.1	-0.561311	8.57976	3.42104e-06	0.000325132
Smp_158310.3	0.935048	7.38904	3.42204e-06	0.000325132
Smp_143690.2	-1.53689	6.06565	3.47071e-06	0.000325132
SmLNCA102665-IBu	2.36956	5.9276	3.48384e-06	0.000325132
Smp_053560.1	1.45888	6.31602	3.49425e-06	0.000325132
Smp_326580.1	-2.47493	6.10304	3.52882e-06	0.000325132
Smp_039000.1	-0.588684	7.39	3.53747e-06	0.000325132
Smp_152710.1	-0.767061	8.69981	3.56447e-06	0.000325132
Smp_212940.1	-0.706484	6.01807	3.61999e-06	0.000325132
Smp_002880.1	-0.645261	9.21294	3.633e-06	0.000325132
Smp_000430.1	-2.01751	10.6987	3.63599e-06	0.000325132
Smp_067000.1	0.788672	7.93368	3.67936e-06	0.000325132
Smp_150500.1	0.646631	7.93449	3.68203e-06	0.000325132
Smp_013540.1	-1.8356	6.83045	3.68672e-06	0.000325132
Smp_080730.1	-1.03725	5.09294	3.70496e-06	0.000325132
Smp_151060.1	1.20507	5.95001	3.72427e-06	0.000325132
Smp_123000.1	0.6902	6.94664	3.75586e-06	0.000325132
Smp_001410.1	-0.745426	7.64583	3.77531e-06	0.000325132
Smp_025150.1	-0.628438	6.86619	3.79897e-06	0.000325132
Smp_340760.3	-0.841564	7.89354	3.82675e-06	0.000325132
Smp_018790.1	1.1963	7.45768	3.84552e-06	0.000325132
Smp_040190.1	0.866545	8.06892	3.85145e-06	0.000325132
Smp_131990.2	1.55609	6.13263	3.88012e-06	0.000325132
Smp_031710.1	-0.642589	7.09326	3.88211e-06	0.000325132
Smp_340190.1	1.22116	6.72326	4.00477e-06	0.000333432
Smp_024490.1	0.659517	6.95834	4.0571e-06	0.000335814
Smp_345640.3	4.2599	2.25548	4.11367e-06	0.000336612
Smp_018870.1	-1.44372	4.84062	4.1143e-06	0.000336612
Smp_125740.1	-0.671836	6.15792	4.17143e-06	0.000336915
Smp_340760.4	-0.957014	9.04768	4.18016e-06	0.000336915
Smp_346370.1	-1.9733	4.90922	4.18943e-06	0.000336915
Smp_169870.1	1.29047	6.311	4.44592e-06	0.000354881
Smp_041980.1	-0.562477	8.05628	4.46296e-06	0.000354881
Smp_162350.1	-0.601292	6.21374	4.5308e-06	0.000358262
Smp_033140.1	0.737323	5.80437	4.59209e-06	0.000361091
Smp_121940.1	1.39441	6.40201	4.76409e-06	0.000372546
Smp_004470.1	-0.499923	7.69708	4.81012e-06	0.000374079
Smp_212830.2	0.654884	6.00403	4.87771e-06	0.000376591
Smp_144970.1	-0.598242	6.77687	4.89563e-06	0.000376591
Smp_066760.1	0.571515	9.35836	4.99541e-06	0.000382189
Smp_080920.1	0.514045	9.69357	5.11432e-06	0.000385556
Smp_144600.1	1.0557	6.60139	5.12065e-06	0.000385556
Smp_049150.1	-0.751133	7.96461	5.12947e-06	0.000385556
SmLNCS173610-IBu	9.99009	2.49117	5.14838e-06	0.000385556
Smp_196160.1	-0.56659	6.60591	5.18581e-06	0.000386315
Smp_212860.1	-0.689813	6.14313	5.25434e-06	0.000389371
Smp_095360.1	-0.802002	11.2481	5.30512e-06	0.000391087
Smp_245870.1	-0.793699	5.78449	5.55747e-06	0.000407567
Smp_307900.1	-2.19467	6.46414	5.68945e-06	0.000415095
Smp_340760.2	-0.944915	8.73592	5.8061e-06	0.000421433
Smp_309250.1	-1.83963	7.91208	5.85768e-06	0.00042277
Smp_159590.1	0.754722	5.63107	5.88425e-06	0.00042277
Smp_135840.1	-0.676557	7.88654	6.31182e-06	0.000451138
Smp_133770.1	6.68779	2.31548	6.34284e-06	0.000451138
Smp_174810.1	0.818929	5.39491	6.44594e-06	0.000456179
Smp_146480.1	-3.87131	1.8978	6.62455e-06	0.000466487
Smp_246770.1	-2.42074	5.79074	6.67148e-06	0.000467466
Smp_168590.1	-0.866008	4.76322	6.71254e-06	0.000468026
Smp_085180.1	-1.56143	5.91146	6.74992e-06	0.000468325
Smp_124240.1	-1.53435	6.15923	6.81072e-06	0.000470239
Smp_138320.1	0.538138	7.298	6.92971e-06	0.000476132
Smp_170630.1	-1.02487	7.7223	7.23876e-06	0.000494963
Smp_337730.1	4.59704	7.40486	7.28034e-06	0.000495413
Smp_154610.1	-0.429369	7.80581	7.31591e-06	0.000495452
Smp_000880.1	-0.639568	8.65022	7.41827e-06	0.000499992
SmLINC113035-IBu	4.92417	1.99374	7.55463e-06	0.000506769
Smp_321910.1	-0.542272	6.33792	7.60752e-06	0.00050791
Smp_080370.1	0.992355	8.41352	7.67477e-06	0.000509597
Smp_244640.1	1.03813	6.66736	7.7048e-06	0.000509597
Smp_103380.1	-0.620179	6.00796	7.74957e-06	0.000510174
Smp_059780.1	-0.529814	7.53406	8.01723e-06	0.000525352
Smp_024180.1	-0.781935	6.62435	8.08511e-06	0.000527358
Smp_197860.1	-0.783548	8.01278	8.20976e-06	0.000531056
Smp_140390.1	0.641124	6.60031	8.24651e-06	0.000531056
Smp_245250.1	-1.29972	4.04127	8.2676e-06	0.000531056
Smp_340740.1	1.61662	3.00006	8.29189e-06	0.000531056
Smp_017280.1	-0.510784	8.53134	8.34663e-06	0.000532154
Smp_103560.1	-0.744566	6.8029	8.53906e-06	0.000540272
Smp_335050.1	-2.36881	7.31639	8.5503e-06	0.000540272
Smp_331480.1	-1.70807	2.27834	8.60852e-06	0.000541534
Smp_150270.1	0.533372	7.40101	8.67396e-06	0.000541707
Smp_096290.1	-0.517674	8.07599	8.68782e-06	0.000541707
Smp_128000.1	-0.58369	6.31327	8.78975e-06	0.000545659
Smp_244940.1	0.836946	5.6451	9.25199e-06	0.000571846
Smp_129510.1	2.50811	5.56302	9.37305e-06	0.000572414
Smp_210550.2	1.12204	4.61382	9.39937e-06	0.000572414
Smp_340130.2	-0.987387	9.57432	9.41723e-06	0.000572414
Smp_191910.1	-2.14054	11.9119	9.42295e-06	0.000572414
Smp_312580.1	-3.17106	4.70886	9.55593e-06	0.000574541
Smp_073280.1	-1.1913	6.14824	9.57442e-06	0.000574541
Smp_055740.1	-1.56954	2.75754	9.58204e-06	0.000574541
Smp_127200.1	-0.694252	6.48628	9.62033e-06	0.000574541
Smp_302980.1	-2.62576	9.12303	9.71423e-06	0.000577711
Smp_164400.1	-1.79724	4.85267	9.79299e-06	0.000579107
Smp_212250.2	9.0737	-0.349167	9.82585e-06	0.000579107
Smp_051400.1	1.29005	5.62834	9.90344e-06	0.000579107
Smp_140020.2	0.739865	6.77378	9.91519e-06	0.000579107
Smp_326610.1	-1.72667	7.92049	9.94228e-06	0.000579107
Smp_074780.1	-0.553701	8.49429	1.02067e-05	0.000592075
Smp_344950.1	-0.961785	6.31799	1.03303e-05	0.000596797
Smp_053420.1	0.779673	7.79628	1.04904e-05	0.000603582
Smp_315420.1	1.01935	9.2725	1.05768e-05	0.000606087
Smp_021730.1	-0.467948	8.66985	1.08164e-05	0.000614625
Smp_134510.1	-0.533794	7.04583	1.08364e-05	0.000614625
Smp_179350.1	1.21378	6.3505	1.0856e-05	0.000614625
Smp_065190.1	-0.66017	6.03072	1.09816e-05	0.000618878
Smp_149320.1	-0.940205	5.01841	1.10186e-05	0.000618878
Smp_155620.1	0.790813	6.74292	1.14726e-05	0.000638256
Smp_332640.1	-3.43323	4.94797	1.14876e-05	0.000638256
Smp_000280.1	-2.06954	8.81271	1.15358e-05	0.000638256
Smp_091240.1	-0.472533	8.97989	1.15718e-05	0.000638256
Smp_333620.1	-0.499893	8.59819	1.16015e-05	0.000638256
Smp_058240.1	-0.525474	8.15435	1.1668e-05	0.000638256
Smp_015090.1	-0.446921	8.20541	1.16793e-05	0.000638256
Smp_031770.1	-0.929361	9.88371	1.17251e-05	0.000638295
Smp_018990.1	-0.407333	8.32977	1.19099e-05	0.000645873
Smp_316160.1	-1.75537	12.0895	1.1979e-05	0.000647142
Smp_153790.1	-0.370042	8.04628	1.21416e-05	0.000650955
Smp_153790.2	-0.370042	8.04628	1.21416e-05	0.000650955
Smp_000190.1	-0.75637	6.71639	1.22717e-05	0.000653689
Smp_340670.1	0.646938	7.92347	1.2285e-05	0.000653689
Smp_045200.2	-0.826596	9.59766	1.24225e-05	0.000658533
Smp_006750.2	-0.735118	5.87754	1.25027e-05	0.000660021
Smp_244150.1	-0.852979	4.25321	1.25438e-05	0.000660021
Smp_163220.1	0.955652	6.11332	1.26269e-05	0.000660716
Smp_142420.2	9.33868	1.02971	1.26586e-05	0.000660716
Smp_144770.1	-0.766085	8.39486	1.26971e-05	0.000660716
Smp_185680.1	2.6521	4.7421	1.27701e-05	0.000662079
Smp_072720.1	0.596533	8.90524	1.28225e-05	0.000662371
Smp_084600.1	-0.549155	6.27074	1.31161e-05	0.000675072
Smp_337090.2	-0.539276	6.7415	1.32292e-05	0.000678428
Smp_043990.2	-0.840561	5.1376	1.33168e-05	0.000680456
Smp_170280.1	-1.80867	6.83911	1.33696e-05	0.000680696
Smp_342420.1	1.66987	5.15162	1.34294e-05	0.000681288
Smp_046090.1	-0.472501	8.504	1.35187e-05	0.000683371
Smp_074390.1	-0.754322	5.57826	1.36154e-05	0.000685779
Smp_196950.1	-2.43902	4.02334	1.36632e-05	0.000685779
Smp_018170.1	1.14466	5.25414	1.38027e-05	0.000690329
Smp_337800.3	-0.617062	5.707	1.40121e-05	0.00069377
Smp_013860.1	0.407801	7.72709	1.40144e-05	0.00069377
Smp_341900.2	-0.807575	7.12786	1.40185e-05	0.00069377
SmLINC111545-IBu	10.1451	-0.317574	1.43363e-05	0.000707027
Smp_340600.1	-0.38734	7.142	1.44915e-05	0.000710221
Smp_002100.1	-1.35622	7.94588	1.45442e-05	0.000710221
Smp_126140.1	0.695177	5.34849	1.46072e-05	0.000710221
Smp_307450.2	1.31	7.46076	1.46106e-05	0.000710221
Smp_048830.1	-0.445947	6.2711	1.4652e-05	0.000710221
Smp_036250.1	-0.478281	6.52044	1.48749e-05	0.000716791
Smp_334450.1	-1.49532	3.95193	1.48888e-05	0.000716791
Smp_124060.1	-1.45397	3.20694	1.50369e-05	0.000721464
Smp_037910.1	-0.552509	7.44475	1.52179e-05	0.000727685
Smp_075210.1	-0.461313	7.09816	1.52791e-05	0.00072815
Smp_322240.1	-0.491416	6.9224	1.54856e-05	0.000733499
Smp_066740.1	-0.448017	6.33382	1.5495e-05	0.000733499
SmLINC177083-IBu	10.0385	0.222455	1.57243e-05	0.00073532
Smp_316490.1	1.60683	6.02569	1.57356e-05	0.00073532
Smp_134870.1	3.20412	6.59332	1.57419e-05	0.00073532
Smp_166280.1	-1.03543	3.60416	1.57435e-05	0.00073532
Smp_089430.1	-0.498752	8.50232	1.57932e-05	0.00073532
Smp_241440.1	-1.5116	4.53124	1.60072e-05	0.000742839
Smp_141150.2	0.466119	6.99866	1.66941e-05	0.000772182
Smp_204720.1	1.3877	3.76312	1.6763e-05	0.000772844
Smp_008070.1	-0.712428	9.72089	1.68704e-05	0.000774234
Smp_103140.1	0.931742	6.06325	1.69025e-05	0.000774234
Smp_345710.1	0.520485	7.03305	1.69714e-05	0.000774883
Smp_141970.1	-0.559842	6.24133	1.70887e-05	0.00077773
Smp_245720.1	-1.47711	6.23037	1.71795e-05	0.000779354
SmLINC110492-IBu	1.81775	2.88574	1.72365e-05	0.000779442
Smp_058150.1	-0.454982	7.30717	1.73056e-05	0.000779649
Smp_018020.1	-0.429421	7.01271	1.73512e-05	0.000779649
Smp_214260.2	-1.0788	3.3864	1.77272e-05	0.000791242
Smp_135980.1	0.947297	5.20067	1.78112e-05	0.000791242
Smp_179720.1	0.623709	6.43097	1.78944e-05	0.000791242
Smp_021100.1	0.473783	6.11689	1.79075e-05	0.000791242
Smp_337860.3	-0.558603	5.46863	1.79832e-05	0.000791242
Smp_135230.1	-2.59615	4.29226	1.799e-05	0.000791242
Smp_079220.1	-0.578935	9.21401	1.80427e-05	0.000791242
Smp_322950.1	-0.779924	7.71465	1.81101e-05	0.000791242
Smp_122900.1	0.80925	7.33606	1.81124e-05	0.000791242
Smp_176430.1	1.36606	4.8052	1.81763e-05	0.000791453
Smp_307020.1	-0.890433	12.2673	1.8229e-05	0.000791453
Smp_174630.1	0.713453	5.27995	1.83732e-05	0.000794009
Smp_242540.1	-1.08024	5.56161	1.84001e-05	0.000794009
Smp_026560.1	-0.458268	9.63714	1.84966e-05	0.000795748
Smp_042700.1	-0.680631	6.80165	1.85909e-05	0.000797383
Smp_022170.1	-0.387657	6.7053	1.87223e-05	0.000800589
Smp_104890.1	-1.31474	3.31497	1.88099e-05	0.000801914
Smp_326560.1	-1.27618	7.1946	1.88733e-05	0.000802199
Smp_000390.1	-1.60106	8.34695	1.9156e-05	0.00081178
Smp_058460.1	-0.398217	7.28083	1.92252e-05	0.000812279
Smp_341240.1	-0.435347	7.01072	1.93466e-05	0.000814976
Smp_159100.1	0.784377	7.02779	1.947e-05	0.00081556
Smp_133310.1	0.650714	6.41523	1.94757e-05	0.00081556
Smp_139760.1	0.724542	5.73277	1.9725e-05	0.000823561
Smp_136190.1	-1.09295	5.67735	2.03068e-05	0.000845361
Smp_126800.3	10.8109	3.18448	2.04218e-05	0.000847656
Smp_014400.1	0.600206	7.35925	2.05627e-05	0.00084914
Smp_163720.1	-0.679677	8.33608	2.06129e-05	0.00084914
Smp_148800.1	-0.491204	7.83544	2.06376e-05	0.00084914
Smp_098960.1	-0.415499	8.61109	2.09683e-05	0.000860248
Smp_336990.1	3.0523	2.45362	2.10452e-05	0.000860908
Smp_142250.1	0.526553	6.59261	2.11073e-05	0.000860957
Smp_126020.1	-0.513436	6.58549	2.13116e-05	0.000864792
Smp_146840.1	-0.91462	4.16893	2.13235e-05	0.000864792
Smp_161560.1	0.651267	5.27098	2.15141e-05	0.000865858
SmLINC170149-IBu	4.85988	1.53952	2.15169e-05	0.000865858
Smp_090890.1	0.781193	6.20794	2.15333e-05	0.000865858
Smp_172460.1	3.24898	4.90347	2.18344e-05	0.000875478
Smp_242890.1	-1.33803	4.31609	2.20416e-05	0.000878951
Smp_266790.1	0.625774	5.91342	2.20452e-05	0.000878951
Smp_041460.1	1.1431	6.82109	2.22013e-05	0.000879291
Smp_133050.1	0.53281	5.8196	2.22113e-05	0.000879291
Smp_266750.1	2.08314	4.90634	2.22401e-05	0.000879291
Smp_027480.1	-0.395558	7.44499	2.24704e-05	0.000885923
Smp_327730.1	-0.462203	6.33257	2.26093e-05	0.000887748
Smp_139970.1	-0.949854	5.67255	2.2836e-05	0.000887748
Smp_039650.1	0.744005	5.62251	2.28639e-05	0.000887748
Smp_006860.1	1.41016	4.11034	2.28751e-05	0.000887748
Smp_157310.1	-1.38176	4.93115	2.2893e-05	0.000887748
Smp_194750.1	-2.64309	3.34594	2.29776e-05	0.000888592
Smp_159090.1	0.796155	5.30384	2.31088e-05	0.000891232
Smp_138030.1	0.76236	7.40946	2.32877e-05	0.000895692
Smp_055800.1	-0.39009	7.1068	2.33738e-05	0.000895692
Smp_075330.1	-1.2472	3.75804	2.34143e-05	0.000895692
Smp_051360.1	-0.547411	7.6136	2.36123e-05	0.00090083
Smp_342110.1	0.864644	4.37183	2.39582e-05	0.000911572
Smp_150860.1	0.883893	7.19336	2.44259e-05	0.000926843
Smp_345770.1	1.03039	4.89302	2.44906e-05	0.000926843
Smp_132740.1	-1.11793	6.49506	2.45712e-05	0.000927414
Smp_346660.1	0.925493	6.9103	2.48293e-05	0.000934664
Smp_341510.1	0.582917	6.71569	2.5034e-05	0.00093987
Smp_043580.1	0.742891	5.32562	2.51819e-05	0.000942409
Smp_194720.1	-0.678118	5.69116	2.52348e-05	0.000942409
Smp_042110.1	-0.397206	6.7332	2.54321e-05	0.000947277
Smp_200240.1	-1.05804	7.61417	2.56589e-05	0.000953004
Smp_312150.1	0.58459	6.90274	2.57205e-05	0.000953004
Smp_078720.1	-1.75234	2.52312	2.6022e-05	0.000958365
Smp_074700.2	-0.606452	6.87629	2.6118e-05	0.000958365
Smp_320320.1	-1.87045	7.45441	2.61709e-05	0.000958365
Smp_199050.1	0.971786	6.66494	2.61867e-05	0.000958365
Smp_015730.1	-0.437997	7.80271	2.62037e-05	0.000958365
Smp_042680.1	-0.450788	8.10726	2.64794e-05	0.000964033
Smp_007450.2	-0.956439	5.2503	2.64949e-05	0.000964033
Smp_013200.1	-0.418821	9.26173	2.66683e-05	0.000965629
Smp_021340.1	0.617986	8.59741	2.66752e-05	0.000965629
Smp_008545.1	-0.472339	9.9051	2.67494e-05	0.000965845
Smp_176350.1	1.06713	6.0608	2.70161e-05	0.000972595
Smp_183710.1	0.575601	11.3951	2.71608e-05	0.000972595
Smp_346170.1	-1.3715	5.63224	2.72073e-05	0.000972595
Smp_133830.1	1.89534	5.82814	2.72112e-05	0.000972595
Smp_054600.1	-0.457623	5.676	2.73058e-05	0.000973516
Smp_041430.1	-0.702006	8.31939	2.74334e-05	0.000975609
Smp_138500.1	0.547944	6.62821	2.78358e-05	0.00098533
Smp_320240.1	-0.801194	6.53915	2.7846e-05	0.00098533
Smp_155320.1	1.17744	4.21415	2.80123e-05	0.000988743
Smp_316640.1	1.06122	5.14299	2.81409e-05	0.000990812
Smp_242130.1	-0.669837	5.60091	2.82417e-05	0.000991894
Smp_022990.1	-0.37867	7.20511	2.83889e-05	0.000994596
Smp_326540.1	-1.6555	6.29575	2.85462e-05	0.000997637
Smp_018250.2	-1.17066	9.51758	2.92046e-05	0.00101643
Smp_247870.1	0.665209	5.77161	2.92823e-05	0.00101643
Smp_180800.1	-0.852757	5.15663	2.92994e-05	0.00101643
Smp_302270.1	13.7553	7.13276	2.94278e-05	0.00101691
Smp_196290.1	-0.478064	6.91577	2.9457e-05	0.00101691
SmLNCA149164-IBu	3.95363	1.25649	2.96037e-05	0.00101949
Smp_245090.1	0.597353	6.34021	2.9975e-05	0.00102977
Smp_040790.1	-0.528471	8.70104	3.01276e-05	0.00103251
SmLINC138359-IBu	-2.17878	2.17678	3.04055e-05	0.00103951
Smp_334180.1	1.44374	3.36981	3.06312e-05	0.0010425
Smp_174320.1	1.65509	3.29633	3.0675e-05	0.0010425
Smp_143970.1	-1.79667	3.14283	3.07685e-05	0.0010425
Smp_347240.1	-0.735773	4.7405	3.07875e-05	0.0010425
Smp_162110.1	-1.2158	4.55069	3.1022e-05	0.00104794
Smp_099090.1	-1.69108	4.04451	3.11817e-05	0.00105082
SmLNCA145622-IBu	3.70729	1.04223	3.13155e-05	0.00105283
Smp_131050.1	-1.46111	5.18459	3.16635e-05	0.00106149
Smp_347270.1	0.834381	6.79268	3.18591e-05	0.00106149
Smp_247740.1	0.610761	5.9582	3.19083e-05	0.00106149
Smp_064330.1	-0.588995	7.02165	3.19084e-05	0.00106149
Smp_143860.1	1.26166	3.46099	3.19482e-05	0.00106149
Smp_070330.1	-1.25613	4.10159	3.22045e-05	0.00106738
Smp_317420.1	0.91887	9.29035	3.23521e-05	0.00106738
Smp_157360.1	-0.387561	8.21141	3.24052e-05	0.00106738
Smp_341590.1	-0.46195	9.32591	3.2488e-05	0.00106738
Smp_179910.1	0.559907	7.01398	3.26913e-05	0.00106738
Smp_128660.1	0.499052	6.46908	3.27068e-05	0.00106738
Smp_300570.1	1.60148	4.25289	3.28248e-05	0.00106738
Smp_126670.1	0.580875	7.68834	3.29244e-05	0.00106738
Smp_079310.1	-0.352025	8.23481	3.30038e-05	0.00106738
Smp_321770.1	0.800044	4.16876	3.31228e-05	0.00106738
Smp_142170.1	0.511267	6.55954	3.31442e-05	0.00106738
Smp_161560.4	0.750459	5.1609	3.32163e-05	0.00106738
Smp_047370.1	-0.63874	9.10438	3.32324e-05	0.00106738
Smp_005290.1	-0.500088	7.34614	3.33667e-05	0.00106738
Smp_073680.2	0.561738	6.45484	3.33673e-05	0.00106738
Smp_089640.1	-0.391021	8.17936	3.33961e-05	0.00106738
Smp_028190.1	1.37214	6.81072	3.34566e-05	0.00106738
Smp_322860.1	-2.13237	2.84604	3.34828e-05	0.00106738
Smp_242200.3	-2.34156	3.54417	3.35677e-05	0.00106768
Smp_086030.1	-0.419954	6.92731	3.40761e-05	0.00108142
Smp_141290.2	-1.27505	5.64345	3.45121e-05	0.00109281
Smp_175550.1	-0.564446	5.1865	3.47815e-05	0.00109819
Smp_141660.2	-0.993922	4.42055	3.48633e-05	0.00109819
Smp_203280.1	-0.454058	8.3705	3.49149e-05	0.00109819
Smp_050280.1	-0.563816	7.70839	3.50454e-05	0.00109985
Smp_128610.1	-0.46991	8.16004	3.5418e-05	0.00110814
Smp_141290.3	-1.00016	8.67071	3.54733e-05	0.00110814
Smp_131020.1	-1.02944	6.56729	3.55735e-05	0.00110814
Smp_247360.1	0.908594	6.72276	3.56659e-05	0.00110814
Smp_024820.1	-0.643378	7.80955	3.58422e-05	0.00110814
Smp_342720.1	-1.01667	3.41579	3.58483e-05	0.00110814
Smp_125890.1	1.46599	4.81945	3.58576e-05	0.00110814
Smp_011010.1	-0.478733	5.81434	3.60224e-05	0.00111081
Smp_333300.1	0.556854	5.4897	3.63545e-05	0.00111591
Smp_247190.1	0.668228	4.84227	3.63631e-05	0.00111591
Smp_121420.1	-0.382652	8.03896	3.64245e-05	0.00111591
Smp_301670.1	0.648051	6.30736	3.65189e-05	0.00111639
Smp_347390.1	-0.867514	7.32013	3.67227e-05	0.0011191
Smp_194870.1	-0.891319	4.97608	3.67657e-05	0.0011191
Smp_076740.1	-0.459379	8.16963	3.69393e-05	0.00112054
Smp_329210.1	-0.449765	6.70861	3.69713e-05	0.00112054
Smp_153930.1	-0.987661	5.28107	3.70928e-05	0.00112182
Smp_095980.1	-1.48315	10.4181	3.72493e-05	0.00112415
Smp_027000.1	0.505207	6.88608	3.75416e-05	0.00113056
Smp_340850.1	-0.669408	7.71948	3.78377e-05	0.0011349
Smp_049380.1	0.555137	7.87166	3.7846e-05	0.0011349
Smp_161360.1	-0.770028	4.37109	3.87034e-05	0.00115474
Smp_153660.1	-1.10902	3.6455	3.87052e-05	0.00115474
SmLINC116019-IBu	-3.32335	1.82142	3.87523e-05	0.00115474
SmLNCS126712-IBu	-3.34992	1.76846	3.88518e-05	0.00115527
Smp_331630.2	3.17687	4.60653	3.91426e-05	0.00116148
SmLNCA115007-IBu	1.42748	4.40161	3.94092e-05	0.00116694
Smp_088270.1	0.583095	6.41956	3.95717e-05	0.00116931
Smp_316610.1	-2.23387	6.09538	3.97029e-05	0.00117074
Smp_331870.1	-0.390795	7.25047	3.98526e-05	0.00117253
Smp_064350.1	-0.432225	7.35149	3.99292e-05	0.00117253
Smp_067520.1	0.627955	6.25138	4.01688e-05	0.00117575
Smp_303590.2	-0.707183	5.02811	4.02052e-05	0.00117575
Smp_326120.1	-2.40409	0.975274	4.05688e-05	0.00118394
Smp_126420.1	-0.928236	5.25937	4.07445e-05	0.00118662
Smp_033000.1	2.16695	3.00213	4.08896e-05	0.0011872
Smp_159570.1	0.696095	5.43862	4.10188e-05	0.0011872
SmLINC131974-IBu	0.679925	6.73697	4.10406e-05	0.0011872
Smp_020550.1	3.2433	4.63391	4.11605e-05	0.0011872
Smp_128370.4	2.15019	1.93582	4.11837e-05	0.0011872
Smp_079640.1	-1.22796	3.39505	4.1274e-05	0.00118738
Smp_125660.1	-0.457949	5.99681	4.13784e-05	0.00118797
Smp_311660.2	4.98451	6.18064	4.16528e-05	0.00119343
Smp_150300.2	0.800914	5.44823	4.17895e-05	0.00119493
Smp_134080.2	-0.58565	6.77097	4.18906e-05	0.0011954
Smp_094250.1	-0.905932	5.71259	4.20667e-05	0.00119801
SmLINC156933-IBu	1.59911	2.99242	4.23668e-05	0.00120374
Smp_326550.1	-1.49544	6.77274	4.24379e-05	0.00120374
Smp_341300.1	-0.498789	8.10335	4.26666e-05	0.00120645
Smp_211020.1	-1.07605	5.29567	4.27422e-05	0.00120645
Smp_062980.1	-0.520743	8.44858	4.27892e-05	0.00120645
Smp_267190.1	1.07526	4.44286	4.31487e-05	0.00121346
Smp_053130.1	-0.445429	9.04953	4.32937e-05	0.00121346
Smp_049520.2	-0.444115	6.08829	4.33391e-05	0.00121346
Smp_057060.1	-0.577139	6.51252	4.34628e-05	0.00121346
Smp_102040.1	-0.426327	9.29118	4.34666e-05	0.00121346
Smp_002510.1	-0.454278	6.33573	4.36504e-05	0.0012162
Smp_155510.1	0.495776	7.13015	4.37572e-05	0.00121678
Smp_059980.1	-0.646806	7.9502	4.40818e-05	0.0012234
Smp_320940.2	-1.16757	4.29448	4.4314e-05	0.00122744
SmLINC100002122	0.696818	4.97229	4.49618e-05	0.00123924
Smp_061230.1	-0.4418	8.25733	4.49667e-05	0.00123924
Smp_030330.1	-0.423356	6.26658	4.50029e-05	0.00123924
SmLNCA106388-IBu	-3.25827	1.67823	4.51625e-05	0.00124122
Smp_018260.1	-0.366578	7.7472	4.52615e-05	0.00124153
Smp_085110.1	-0.65586	8.72935	4.56037e-05	0.0012485
Smp_311360.3	0.962506	5.56924	4.57125e-05	0.00124906
Smp_155900.1	1.5187	4.31933	4.58976e-05	0.0012517
Smp_053030.1	-0.39512	6.78347	4.59983e-05	0.00125204
Smp_245030.1	-0.56755	5.9377	4.6197e-05	0.00125503
Smp_055100.1	0.987419	5.82018	4.63678e-05	0.00125671
Smp_341810.1	-0.717679	6.03809	4.64364e-05	0.00125671
Smp_036400.1	-0.530044	7.14655	4.67235e-05	0.00126185
Smp_306630.1	-0.408766	6.06514	4.68116e-05	0.00126185
Smp_032260.1	-0.344455	7.68565	4.69828e-05	0.00126185
Smp_032260.2	-0.344455	7.68565	4.69828e-05	0.00126185
Smp_128230.1	0.366725	7.69941	4.72081e-05	0.0012655
Smp_049270.1	1.11157	10.2493	4.75184e-05	0.00127141
Smp_087870.1	1.0497	4.77832	4.76303e-05	0.001272
Smp_198980.1	0.662598	6.94811	4.78291e-05	0.00127462
Smp_098330.1	-0.511711	6.56559	4.80272e-05	0.00127462
Smp_156410.1	0.712694	6.08886	4.80462e-05	0.00127462
Smp_023270.1	0.469105	6.60271	4.81096e-05	0.00127462
Smp_019750.1	-0.513376	8.44402	4.81788e-05	0.00127462
Smp_267090.1	0.508003	7.01667	4.85352e-05	0.00128166
Smp_159140.1	0.859277	5.74608	4.88309e-05	0.00128706
Smp_171540.1	0.861664	6.87006	4.94285e-05	0.00129802
Smp_072190.1	0.554215	9.14827	4.943e-05	0.00129802
Smp_160290.1	0.891532	4.06674	4.96802e-05	0.00130217
Smp_181410.1	-0.490485	5.77382	5.04852e-05	0.00132083
Smp_322640.1	-3.46493	-0.391181	5.10969e-05	0.00133277
Smp_042590.1	-0.45227	7.74377	5.11453e-05	0.00133277
Smp_134290.1	0.617448	5.51943	5.12242e-05	0.00133277
Smp_082030.1	-0.416992	8.1314	5.13623e-05	0.00133391
Smp_178990.2	1.22512	4.26664	5.23229e-05	0.00135187
Smp_019050.1	-0.481421	6.00761	5.23857e-05	0.00135187
Smp_032760.1	-0.438014	8.49084	5.23888e-05	0.00135187
Smp_342040.1	1.71225	4.63648	5.2436e-05	0.00135187
Smp_089240.1	-0.373306	7.78464	5.25905e-05	0.00135339
Smp_093920.1	0.490931	6.83276	5.28787e-05	0.00135606
Smp_200150.1	3.84427	0.946627	5.30208e-05	0.00135606
Smp_246240.1	1.01911	6.09684	5.3066e-05	0.00135606
Smp_332480.2	0.896696	5.08906	5.31625e-05	0.00135606
Smp_129710.1	-1.01268	4.71585	5.33105e-05	0.00135606
Smp_016600.1	-1.09333	7.02477	5.33338e-05	0.00135606
Smp_319790.1	1.03499	5.40653	5.33649e-05	0.00135606
Smp_128110.1	-1.00724	4.23995	5.37832e-05	0.00136424
Smp_031920.1	0.655823	5.22981	5.39268e-05	0.00136544
Smp_316030.1	-0.568108	5.78705	5.41057e-05	0.00136752
Smp_008360.1	1.08043	6.94401	5.42528e-05	0.00136818
Smp_124450.1	0.855782	6.73893	5.4325e-05	0.00136818
Smp_341610.1	-0.759369	4.86993	5.52815e-05	0.00138698
Smp_203030.1	-0.997124	6.15154	5.53532e-05	0.00138698
Smp_347370.1	-2.76986	0.674978	5.53657e-05	0.00138698
Smp_008490.1	-0.681275	8.15352	5.54635e-05	0.00138698
Smp_004190.1	-0.423493	6.86853	5.56913e-05	0.00138924
Smp_332450.1	-1.07802	4.55842	5.57502e-05	0.00138924
Smp_327170.1	-2.73795	2.94472	5.59269e-05	0.00139119
Smp_333250.1	-1.5903	5.54943	5.62125e-05	0.00139233
Smp_306710.1	-0.324259	8.20869	5.6276e-05	0.00139233
Smp_343410.1	-1.33473	3.38839	5.63429e-05	0.00139233
Smp_346200.1	-0.41278	6.53588	5.63662e-05	0.00139233
Smp_334200.1	0.4687	6.75979	5.66852e-05	0.00139596
Smp_145930.1	1.53076	3.69463	5.67103e-05	0.00139596
Smp_200410.1	0.672684	5.63208	5.70073e-05	0.00140084
Smp_053700.1	-0.534868	6.94792	5.71497e-05	0.0014019
SmLINC132033-IBu	-2.02422	2.85718	5.74074e-05	0.00140579
Smp_310870.1	0.359857	6.9125	5.75418e-05	0.00140596
Smp_340760.8	-0.959538	8.61181	5.76134e-05	0.00140596
Smp_022400.1	-0.463736	9.26634	5.78008e-05	0.00140811
Smp_017610.1	-2.59963	5.2911	5.81689e-05	0.00141464
Smp_082620.1	-0.439892	7.92027	5.84381e-05	0.00141875
Smp_019790.2	0.679268	6.31586	5.8645e-05	0.00142128
Smp_033930.1	1.63176	3.45751	5.89705e-05	0.00142128
Smp_074470.1	-0.381819	8.6754	5.89939e-05	0.00142128
Smp_137210.1	0.654338	6.87836	5.9017e-05	0.00142128
Smp_194770.1	-0.740683	9.07289	5.90443e-05	0.00142128
Smp_154080.1	-0.733621	4.17391	5.93116e-05	0.00142529
Smp_129080.1	-0.338326	7.63303	5.99415e-05	0.00143799
Smp_123600.1	0.365165	6.54593	6.05491e-05	0.0014501
Smp_079010.1	-0.62214	5.73837	6.08581e-05	0.00145504
Smp_119920.1	-0.394584	8.27026	6.11811e-05	0.00145816
Smp_345280.1	1.21735	5.79319	6.11944e-05	0.00145816
Smp_003620.1	0.314794	7.36329	6.13644e-05	0.00145975
Smp_061680.1	0.38049	6.74402	6.16673e-05	0.00146331
Smp_341010.1	-0.441669	7.0961	6.17206e-05	0.00146331
SmLNCA144348-IBu	-4.44707	-0.592637	6.18529e-05	0.00146399
Smp_087620.1	0.534544	8.27576	6.19907e-05	0.0014648
Smp_310770.1	0.580737	5.7408	6.21941e-05	0.00146693
Smp_121790.1	-0.344654	6.64578	6.23605e-05	0.00146693
Smp_158910.1	-0.476062	6.63353	6.23916e-05	0.00146693
Smp_145320.4	-1.14201	4.53242	6.27466e-05	0.00147105
Smp_083740.1	0.381328	6.91587	6.27747e-05	0.00147105
Smp_038710.1	-0.404299	5.90557	6.30622e-05	0.00147534
Smp_137920.1	0.41179	7.8672	6.33102e-05	0.0014787
Smp_144010.1	-0.548582	7.94925	6.3445e-05	0.00147941
Smp_213150.1	0.59276	5.60774	6.36027e-05	0.00148065
Smp_165630.1	0.528613	6.05666	6.38636e-05	0.00148428
SmLINC161895-IBu	0.898212	4.14671	6.45696e-05	0.00149823
Smp_172530.1	-0.614763	4.88152	6.48113e-05	0.00149983
Smp_026280.1	0.502707	6.81454	6.48505e-05	0.00149983
Smp_333360.1	6.69797	2.79421	6.56632e-05	0.00150841
Smp_204380.1	0.491281	6.35433	6.57601e-05	0.00150841
Smp_082280.1	0.546494	7.76758	6.58273e-05	0.00150841
Smp_063070.1	0.518702	6.21124	6.59994e-05	0.00150841
Smp_025380.1	-0.856137	6.69836	6.60459e-05	0.00150841
Smp_302470.1	-0.691527	4.48373	6.61021e-05	0.00150841
Smp_000180.1	-1.40961	4.02531	6.61415e-05	0.00150841
Smp_136950.2	1.45368	3.42906	6.61808e-05	0.00150841
Smp_145400.1	0.849512	4.76424	6.65762e-05	0.00151498
Smp_082570.1	-0.356895	7.55285	6.7333e-05	0.0015273
Smp_112450.1	-1.22413	6.70308	6.73334e-05	0.0015273
Smp_344060.1	-0.628875	6.6495	6.76833e-05	0.00153278
Smp_161530.2	0.595203	5.74604	6.80541e-05	0.00153872
SmLINC130789-IBu	-3.62428	-0.013043	6.86664e-05	0.0015476
Smp_042140.1	-0.396704	7.78516	6.8708e-05	0.0015476
Smp_125810.1	0.508002	6.86514	6.8775e-05	0.0015476
Smp_003970.1	-0.434941	7.49554	6.91087e-05	0.00155264
Smp_333000.1	-2.16467	3.91558	6.97807e-05	0.00156526
Smp_343700.1	1.2431	4.05141	7.00623e-05	0.00156748
Smp_081140.4	11.9471	2.09689	7.01012e-05	0.00156748
Smp_154760.2	-2.5255	5.8236	7.05201e-05	0.00157436
Smp_158670.1	0.449714	6.09249	7.19714e-05	0.00160423
SmLINC115064-IBu	-2.65404	1.17148	7.27531e-05	0.0016191
Smp_302280.1	1.30303	10.2344	7.30001e-05	0.00162205
SmLINC116576-IBu	7.0527	-0.585332	7.32328e-05	0.00162467
Smp_160760.2	0.468662	6.601	7.33917e-05	0.00162538
Smp_247080.1	2.31974	3.40662	7.34946e-05	0.00162538
Smp_033700.1	-0.753139	4.29927	7.36594e-05	0.00162648
Smp_313300.1	3.44185	2.74894	7.37766e-05	0.00162653
Smp_214320.2	-2.64155	1.84677	7.43271e-05	0.00163082
Smp_337660.1	-0.470804	6.30399	7.43312e-05	0.00163082
Smp_031730.1	-0.397142	6.21497	7.44212e-05	0.00163082
Smp_074590.1	-0.590506	5.59134	7.44317e-05	0.00163082
Smp_059150.1	-0.39172	6.92365	7.54031e-05	0.00164954
Smp_024110.1	-0.448008	11.1293	7.69101e-05	0.00167992
Smp_306180.1	1.51851	2.54219	7.76263e-05	0.00169295
Smp_158480.1	-2.3445	4.55931	7.82068e-05	0.00170298
Smp_084540.2	1.624	3.94108	7.84941e-05	0.00170661
Smp_214030.1	-0.302261	8.09116	7.86461e-05	0.0017073
Smp_316380.2	-1.56029	3.12098	7.9134e-05	0.00171308
SmLNCA121443-IBu	1.78533	2.75917	7.92217e-05	0.00171308
Smp_245600.2	1.07147	4.46255	7.92755e-05	0.00171308
SmLINC112782-IBu	-5.19701	-0.0487517	7.95997e-05	0.00171426
Smp_195070.1	4.20168	2.65465	7.96937e-05	0.00171426
Smp_195070.2	4.20168	2.65465	7.96937e-05	0.00171426
Smp_324820.1	2.4235	1.79446	8.0167e-05	0.00171989
Smp_137540.1	-0.370749	6.77947	8.0249e-05	0.00171989
SmLINC109983-IBu	-2.60689	1.80334	8.03197e-05	0.00171989
Smp_054610.1	-1.17082	4.14585	8.08152e-05	0.00172788
Smp_058190.1	-0.794339	4.97992	8.10106e-05	0.00172945
Smp_210930.1	-0.373961	7.07826	8.12469e-05	0.0017296
Smp_135790.2	-0.469303	6.80949	8.12621e-05	0.0017296
Smp_312630.1	0.856558	5.90539	8.15345e-05	0.00173279
Smp_092570.1	-0.342167	7.55961	8.17795e-05	0.00173539
Smp_021600.1	-1.00569	5.02533	8.20041e-05	0.00173755
Smp_136550.1	-0.621763	6.43095	8.26138e-05	0.00174786
Smp_303950.1	0.882005	5.76326	8.36205e-05	0.00176651
Smp_161080.2	0.70942	6.44504	8.47295e-05	0.00178602
Smp_309990.1	1.09051	3.42394	8.47963e-05	0.00178602
Smp_002080.1	0.712622	8.07212	8.54516e-05	0.00179612
Smp_024850.1	-0.40569	7.36129	8.56563e-05	0.00179612
Smp_024850.2	-0.40569	7.36129	8.56563e-05	0.00179612
Smp_130500.1	1.62504	3.05867	8.73693e-05	0.00182933
Smp_094330.2	0.597199	5.55507	8.75836e-05	0.00183111
Smp_072330.1	-0.887392	12.0073	8.78944e-05	0.00183489
Smp_102160.1	0.842295	4.60873	8.80361e-05	0.00183514
Smp_015720.1	-0.329729	7.56027	8.82631e-05	0.00183717
Smp_337140.5	-0.432333	6.71794	8.88129e-05	0.00184378
Smp_064510.1	0.518333	7.35032	8.88413e-05	0.00184378
Smp_340610.2	-1.19844	2.9557	8.93275e-05	0.00185116
Smp_029800.1	0.828984	5.83452	8.99255e-05	0.00185822
Smp_002920.1	0.710679	6.1153	8.9931e-05	0.00185822
Smp_089320.1	-0.763632	6.49091	9.09161e-05	0.00187584
Smp_087550.1	-0.310761	7.78881	9.10641e-05	0.00187616
Smp_346670.1	-0.483513	8.34432	9.16799e-05	0.0018861
Smp_335190.1	-1.30655	6.64296	9.19993e-05	0.00188992
Smp_302090.1	-0.663225	7.55159	9.25327e-05	0.00189813
Smp_201030.1	-0.556376	8.57169	9.29593e-05	0.00190245
Smp_164950.1	-0.757714	4.23901	9.30121e-05	0.00190245
Smp_342020.1	1.5493	4.57273	9.31764e-05	0.00190306
Smp_175420.1	-0.476475	7.73415	9.45861e-05	0.00192907
Smp_329010.1	-1.1837	5.86579	9.50438e-05	0.00193561
Smp_015780.2	0.899042	4.00217	9.64176e-05	0.00195879
Smp_023250.2	0.954044	4.00414	9.65026e-05	0.00195879
Smp_340130.1	-0.642541	6.66865	9.65971e-05	0.00195879
Smp_340530.1	-0.972194	4.05436	9.67727e-05	0.00195954
Smp_129410.1	-0.855773	3.66051	9.69747e-05	0.00196083
Smp_213350.1	-0.530104	5.84616	9.71832e-05	0.00196224
Smp_203580.1	-1.10154	5.72754	9.74791e-05	0.00196541
Smp_041630.1	0.431117	6.64228	9.77593e-05	0.00196555
Smp_034500.1	1.05178	5.25197	9.77636e-05	0.00196555
SmLINC133371-IBu	1.26592	5.5337	9.7945e-05	0.0019664
Smp_045960.1	-0.431001	7.51424	9.87789e-05	0.001977
Smp_316340.4	0.634382	6.32181	9.88238e-05	0.001977
Smp_204770.1	-0.418048	9.0253	9.88919e-05	0.001977
Smp_138160.1	-0.498889	5.38391	9.94783e-05	0.00198592
Smp_141160.1	-1.13974	3.84517	9.98444e-05	0.001989
Smp_094190.1	0.581298	6.17099	9.99139e-05	0.001989
Smp_247230.1	0.633692	6.7995	0.000100814	0.0020013
Smp_062790.1	-0.367652	6.97363	0.000100909	0.0020013
Smp_245790.2	0.623417	5.83884	0.000100956	0.0020013
Smp_144450.2	0.572698	5.86805	0.000101203	0.00200161
Smp_312560.1	1.60455	4.5021	0.000101254	0.00200161
Smp_008580.1	-0.421971	6.80362	0.000101832	0.00201022
Smp_042090.1	-0.445822	8.79256	0.000102294	0.00201654
SmLNCA173084-IBu	-1.93249	1.26357	0.000103496	0.00203688
Smp_331510.3	1.63781	3.07396	0.000103722	0.00203688
Smp_093440.1	-0.378866	8.84901	0.00010377	0.00203688
Smp_099890.1	-0.410726	8.54134	0.000103902	0.00203688
Smp_022020.1	0.384358	6.22006	0.000104169	0.00203929
Smp_128370.2	0.881583	6.31148	0.000104997	0.00205095
Smp_005880.1	-0.874	6.6025	0.000105153	0.00205095
Smp_139180.1	1.97581	2.17044	0.000105199	0.00205095
Smp_069170.1	0.664906	5.87061	0.000105821	0.00206023
Smp_000810.1	-0.434742	5.94645	0.000106304	0.00206679
Smp_245890.1	-0.508876	8.65109	0.00010651	0.00206796
Smp_085910.1	0.839415	6.67673	0.000106885	0.0020724
Smp_090800.1	-0.467782	7.51561	0.000107182	0.00207346
Smp_134720.1	0.703677	6.15343	0.000107233	0.00207346
Smp_151100.1	-0.856569	6.17743	0.000107957	0.00208461
SmLNCA143200-IBu	4.5545	1.69148	0.000108414	0.00209058
Smp_119110.1	0.876304	6.07396	0.000108641	0.00209212
Smp_025010.1	-0.357438	8.15814	0.000108904	0.00209432
Smp_143490.1	-0.794195	4.87103	0.000109328	0.00209964
Smp_149080.2	0.577309	6.46511	0.000109979	0.00210927
Smp_130580.1	0.427321	8.13624	0.000110501	0.00211395
Smp_004550.1	-0.561423	7.03097	0.000110521	0.00211395
Smp_006860.3	-0.802438	8.55378	0.000110773	0.0021159
Smp_004910.1	0.361385	7.28649	0.000111904	0.00213462
Smp_194800.2	0.99256	5.12939	0.000112158	0.00213465
SmLINC132029-IBu	-2.11481	2.06169	0.000112217	0.00213465
Smp_136710.2	-1.23994	8.33319	0.000112358	0.00213465
Smp_024120.1	-0.338789	8.29871	0.000113404	0.00215072
Smp_167010.1	0.432729	7.84361	0.000113508	0.00215072
Smp_204120.1	1.48186	2.93849	0.000113771	0.00215283
Smp_340390.1	-0.434542	5.94572	0.000114471	0.00216319
SmLINC153863-IBu	6.80464	-0.577238	0.000114931	0.00216898
Smp_171600.3	1.01149	4.19337	0.000115721	0.00217734
Smp_039400.1	-0.382512	9.57427	0.000115753	0.00217734
Smp_333170.1	-0.787712	8.04423	0.000115836	0.00217734
Smp_244610.1	0.808268	5.07606	0.000116229	0.00218183
Smp_127830.1	0.44781	6.53137	0.000116384	0.00218184
Smp_241620.1	-1.21853	9.13245	0.000116617	0.00218333
Smp_017830.1	-0.428863	8.17364	0.000116907	0.00218383
Smp_151660.1	-1.8278	1.40344	0.000116952	0.00218383
Smp_033970.1	-0.519939	5.89391	0.000117421	0.00218969
Smp_030010.1	0.605596	8.16454	0.000118115	0.00219973
Smp_132210.1	0.769075	7.00393	0.000118618	0.00220282
Smp_026160.1	-0.36376	9.02766	0.000118745	0.00220282
Smp_174220.1	0.41778	6.48971	0.000118914	0.00220282
Smp_308140.3	0.886008	5.32561	0.000119055	0.00220282
Smp_198360.1	0.913075	5.03461	0.000119059	0.00220282
Smp_341340.1	-1.66231	2.41095	0.000119268	0.00220382
Smp_146240.1	0.398518	5.73247	0.000119497	0.00220517
Smp_313310.1	3.50115	1.01683	0.000120195	0.00221516
Smp_063350.1	-0.334722	8.11724	0.000121173	0.00222455
Smp_342070.1	0.737685	4.73043	0.000121292	0.00222455
Smp_342070.2	0.737685	4.73043	0.000121292	0.00222455
Smp_016870.2	-0.955649	3.62263	0.000121416	0.00222455
Smp_089000.1	-0.406184	8.20041	0.000121586	0.00222455
Smp_020770.1	-0.345073	7.50842	0.000121648	0.00222455
Smp_308930.1	-0.687782	5.78148	0.000122162	0.00223108
Smp_174720.1	-0.335324	6.82154	0.000123746	0.00225709
SmLINC118187-IBu	-1.9829	1.27058	0.000124716	0.00227185
SmLINC114091-IBu	-4.3416	2.0766	0.000125572	0.00228451
SmLNCA103437-IBu	-2.70858	1.45934	0.000125887	0.00228729
Smp_031770.3	-0.829443	6.05089	0.000126453	0.00229095
Smp_147160.1	0.735561	4.01821	0.000126648	0.00229095
Smp_074190.1	-0.894544	5.74108	0.000126673	0.00229095
Smp_126020.2	1.37529	3.78002	0.000126735	0.00229095
Smp_145020.1	-1.70248	2.84226	0.000127384	0.00229973
Smp_168040.1	0.34922	7.56041	0.000128205	0.00230904
Smp_318150.1	-1.55269	7.62732	0.000128264	0.00230904
SmLINC161393-IBu	1.46751	4.08655	0.000130427	0.00234272
SmLINC165217-IBu	1.08953	2.93579	0.000130841	0.0023443
Smp_027610.1	-0.389366	8.76409	0.000130913	0.0023443
Smp_157720.1	0.366855	6.40893	0.000131036	0.0023443
Smp_346150.1	-0.973857	3.95244	0.000131233	0.0023443
Smp_004680.1	0.943227	8.40919	0.000131489	0.0023443
Smp_329570.1	2.79241	1.10605	0.000131509	0.0023443
Smp_163610.1	-1.05469	7.00958	0.000132075	0.00235144
Smp_012530.1	-0.514741	6.55779	0.000132795	0.00236127
Smp_038950.1	-0.508349	10.8074	0.000133312	0.00236529
Smp_035470.1	-0.358491	8.51556	0.000133412	0.00236529
Smp_054360.2	-0.561272	7.05999	0.000133522	0.00236529
Smp_012410.1	-0.317971	6.61292	0.000133804	0.00236733
Smp_012570.1	0.455041	6.64553	0.000134263	0.00237248
Smp_034430.1	-0.390641	5.81158	0.000135361	0.00238487
Smp_340290.1	0.311591	7.38943	0.000135467	0.00238487
Smp_150690.1	-0.304961	7.10683	0.000135601	0.00238487
Smp_010820.1	-0.599155	7.21126	0.000135638	0.00238487
Smp_077390.1	-0.489414	7.21432	0.000136556	0.00239585
Smp_172490.1	-0.46956	5.53883	0.000136601	0.00239585
Smp_052280.1	-0.340287	7.29546	0.000136994	0.00239934
Smp_342350.1	-0.614599	5.50191	0.000137139	0.00239934
Smp_157930.1	-0.67792	5.69254	0.000138733	0.0024237
Smp_141630.2	0.684222	5.77871	0.000138874	0.0024237
Smp_130280.2	0.93104	6.66786	0.000140437	0.00244796
Smp_046630.1	0.467965	9.41318	0.000141151	0.00245738
SmLINC151257-IBu	-3.32375	-0.528404	0.000141557	0.00246143
Smp_246840.1	-0.507904	8.22784	0.000142063	0.0024652
Smp_009600.1	-0.696686	4.57417	0.000142294	0.0024652
Smp_015860.1	-0.448397	6.17993	0.000142444	0.0024652
Smp_306600.1	0.524747	10.2717	0.000142471	0.0024652
Smp_047060.1	-0.376568	7.48214	0.000142997	0.00246934
Smp_099320.1	-0.498451	6.32523	0.000143059	0.00246934
SmLINC147754-IBu	2.02783	2.30882	0.000143797	0.00247905
Smp_347650.1	-0.817631	4.9847	0.000145241	0.00249592
Smp_103320.1	-0.276079	7.85551	0.000145304	0.00249592
Smp_046290.1	-0.543802	9.16323	0.000145494	0.00249614
Smp_245350.2	-2.94853	2.00071	0.000145829	0.00249886
SmLNCA149161-IBu	7.39618	-0.20452	0.000146696	0.00250934
Smp_340360.1	0.539137	7.58974	0.000146795	0.00250934
Smp_337410.2	0.370105	6.42472	0.000147013	0.00250943
Smp_174300.1	0.854799	4.4418	0.000147155	0.00250943
Smp_087580.1	0.516056	8.49378	0.000147389	0.00250948
Smp_344360.1	-1.54544	7.84896	0.000147512	0.00250948
Smp_171770.1	0.639633	5.85815	0.000149551	0.00254111
Smp_156230.1	-0.657835	6.90564	0.000150895	0.00256087
Smp_121140.2	1.07775	3.15721	0.000152014	0.00257678
Smp_307270.1	-1.2347	4.01369	0.00015494	0.00262308
Smp_345720.1	1.10962	4.78819	0.00015534	0.00262308
Smp_094140.1	-0.545756	5.71067	0.000155447	0.00262308
Smp_163760.2	0.657877	5.05078	0.000155487	0.00262308
Smp_100140.1	-0.486251	5.80244	0.000156385	0.00263509
Smp_179180.1	-0.279504	8.2816	0.000156858	0.00263966
Smp_344350.2	7.73709	1.10886	0.000157029	0.00263966
Smp_143840.1	-0.484646	10.7965	0.000157601	0.00264612
Smp_163710.1	-0.921912	9.49781	0.000157834	0.0026469
Smp_004990.1	-0.388285	8.28021	0.000158389	0.00265307
Smp_068280.1	-0.867562	8.6751	0.000158884	0.00265558
Smp_212360.2	0.437308	6.15376	0.000158915	0.00265558
SmLNCA123831-IBu	-1.36799	2.64889	0.000159544	0.00266295
Smp_121160.1	1.30933	3.32974	0.000160185	0.0026705
Smp_026270.1	0.540773	6.67576	0.000160522	0.00267119
Smp_317600.1	-0.424506	6.40667	0.000160603	0.00267119
Smp_063250.2	0.58448	5.05275	0.000161614	0.00268484
Smp_144960.1	-0.712267	4.79113	0.000162923	0.00269627
Smp_194240.1	0.381659	5.81734	0.000163074	0.00269627
Smp_016630.1	-0.614419	7.07462	0.000163211	0.00269627
Smp_065180.1	-0.467682	7.24588	0.000163228	0.00269627
Smp_179320.2	-0.873062	5.42444	0.000163254	0.00269627
Smp_150150.1	1.0702	3.58815	0.000163783	0.00270184
Smp_163000.1	0.379071	6.3028	0.000164224	0.00270596
Smp_158460.2	0.927214	3.69027	0.000164658	0.00270755
Smp_022640.1	-0.269873	8.35425	0.000164752	0.00270755
Smp_335750.1	0.440647	6.7552	0.000164894	0.00270755
Smp_245280.1	0.507932	6.06183	0.000166527	0.00272804
Smp_243000.1	0.757353	5.89731	0.00016698	0.00273144
Smp_073300.1	-0.6942	4.87973	0.000167275	0.00273144
Smp_027430.2	-0.907462	5.21271	0.000167661	0.00273144
Smp_132020.1	0.399262	7.22898	0.00016768	0.00273144
Smp_340510.2	-0.443708	6.80843	0.000167699	0.00273144
Smp_129310.1	1.01596	4.89532	0.000168837	0.00274282
Smp_242740.1	0.321893	8.12114	0.000168844	0.00274282
Smp_154530.1	-0.37998	8.64893	0.00016898	0.00274282
SmLINC131068-IBu	-2.03953	1.86677	0.000169615	0.00274778
Smp_065610.1	-0.504818	11.0192	0.000169674	0.00274778
Smp_067400.1	-0.342571	6.61855	0.000170177	0.00275279
Smp_093950.1	0.367994	7.67831	0.000170903	0.00276137
Smp_156740.2	1.22842	3.98358	0.000172396	0.00277947
Smp_164020.1	1.0522	3.72576	0.000172416	0.00277947
Smp_345500.1	-2.75944	7.15757	0.000172845	0.00278322
Smp_340910.1	-0.414211	8.30932	0.000173323	0.00278727
Smp_301730.1	-0.498622	6.71235	0.000173536	0.00278727
Smp_060860.1	0.464575	6.2395	0.000173688	0.00278727
Smp_031770.2	-1.37663	7.49456	0.000174028	0.00278957
Smp_332900.1	0.513008	5.41282	0.000174774	0.00279768
Smp_130690.1	0.454378	6.90945	0.000174929	0.00279768
Smp_058450.1	0.471532	6.37042	0.000175268	0.00279993
Smp_166350.1	-0.645113	7.07062	0.000175597	0.00280203
Smp_012480.1	-0.52318	6.14472	0.000175918	0.002804
Smp_009650.1	-0.456796	8.37868	0.000176748	0.00281405
Smp_322000.1	-0.393872	6.73667	0.000177102	0.00281651
Smp_124460.1	-0.416632	7.10946	0.000178093	0.00282911
Smp_008310.1	-0.336368	8.0677	0.000178475	0.00283199
Smp_176100.2	-0.8635	3.54013	0.000178702	0.00283241
Smp_326090.1	0.996176	5.89907	0.000179254	0.00283579
Smp_311610.1	-0.374292	5.88781	0.000179477	0.00283579
Smp_019190.1	0.729266	6.65369	0.000179516	0.00283579
Smp_000670.1	-0.322539	7.77818	0.000181207	0.00285932
Smp_153500.1	0.880816	6.43165	0.00018219	0.00286859
Smp_175810.1	-0.349267	7.39135	0.0001822	0.00286859
Smp_126730.1	0.769019	3.8927	0.000183415	0.00288451
Smp_337040.1	-0.449047	5.21762	0.000183968	0.00289
Smp_032320.1	0.870096	4.94187	0.000185916	0.00291528
Smp_054810.1	0.711399	5.55259	0.00018599	0.00291528
Smp_136590.1	-0.423974	6.52941	0.000186574	0.00292121
Smp_050940.1	-0.400368	8.34971	0.000187135	0.00292675
Smp_320540.1	-0.529401	5.51301	0.000187867	0.00293495
Smp_241500.1	0.487307	5.15242	0.000188088	0.00293516
Smp_214060.1	-0.366317	10.0168	0.00018898	0.00294301
Smp_334000.1	8.22837	1.21181	0.000189006	0.00294301
Smp_331460.1	-0.97111	6.01791	0.000189615	0.00294623
Smp_011270.2	0.537358	8.5894	0.000189645	0.00294623
Smp_019690.1	0.451297	7.77821	0.000189838	0.00294623
Smp_203950.1	0.608929	6.82265	0.000191842	0.0029676
Smp_127930.1	0.779314	5.51622	0.000191901	0.0029676
Smp_168930.1	-0.460302	6.61872	0.000191944	0.0029676
Smp_330630.1	-1.28093	4.10374	0.000192053	0.0029676
Smp_144990.1	0.612862	6.58075	0.000194608	0.0030038
Smp_123280.1	-0.48677	7.61945	0.000195458	0.00301363
Smp_093450.1	-0.46921	5.97824	0.000196272	0.00302147
Smp_079920.1	-0.43529	7.31465	0.000196607	0.00302147
Smp_079920.2	-0.43529	7.31465	0.000196607	0.00302147
Smp_103920.1	0.663111	4.72524	0.000197607	0.00303354
SmLINC127930-IBu	4.0645	1.59321	0.000198338	0.00304146
Smp_344810.1	-1.15418	6.33036	0.000198991	0.0030463
Smp_070770.1	-0.479499	5.86415	0.00019913	0.0030463
Smp_306230.1	-0.408266	5.66365	0.000200039	0.00305431
Smp_127370.1	-0.767663	4.6935	0.000200504	0.00305812
Smp_344580.1	-0.715569	9.92867	0.000200968	0.00306189
Smp_068170.1	-0.365001	7.61007	0.000201845	0.00306984
Smp_068070.1	0.60029	7.03257	0.000201931	0.00306984
Smp_317870.1	-0.914066	4.85919	0.00020214	0.00306984
Smp_155850.1	-1.02453	3.90054	0.000203017	0.00307985
Smp_121600.1	0.602705	5.4383	0.000203881	0.00308965
Smp_096240.1	0.535203	6.81067	0.00020422	0.00309147
Smp_326570.1	-2.47908	1.82994	0.000205233	0.00310349
Smp_344480.2	-2.05192	2.50737	0.000206439	0.0031184
Smp_075350.1	0.679805	5.45708	0.000206689	0.00311884
Smp_145890.1	0.59979	7.46827	0.000207715	0.00312784
Smp_246240.2	1.59582	2.57432	0.000207727	0.00312784
Smp_309480.1	1.23009	8.46763	0.000209004	0.00314372
Smp_005260.1	-0.511066	6.51715	0.000210621	0.00316165
Smp_054770.2	-1.03754	3.36895	0.000210796	0.00316165
Smp_342740.2	0.311712	7.16042	0.000210866	0.00316165
Smp_132670.1	-0.686142	11.8588	0.000211367	0.0031658
Smp_212940.2	-0.62971	4.00178	0.000212619	0.00317394
Smp_346260.1	0.689225	4.53365	0.000213071	0.00317394
Smp_083080.1	-0.375012	8.46594	0.000213149	0.00317394
SmLNCA111136-IBu	2.99181	1.05862	0.000213277	0.00317394
SmLNCA175820-IBu	-1.70155	2.92606	0.000213331	0.00317394
Smp_326200.1	1.03731	3.46048	0.000213347	0.00317394
Smp_344600.1	0.739744	4.80014	0.000213574	0.00317394
Smp_144940.1	0.377673	7.48598	0.000213704	0.00317394
Smp_126210.1	-1.66795	3.52523	0.000214395	0.00317936
Smp_155310.1	-1.37603	8.52558	0.000214518	0.00317936
SmLINC135985-IBu	-1.56788	2.14829	0.000214748	0.00317943
Smp_335120.1	-0.736473	5.31504	0.000215779	0.00319096
Smp_343890.1	0.623161	5.85054	0.000215977	0.00319096
Smp_006680.1	-0.644058	6.3933	0.000217548	0.00321082
Smp_344390.1	-0.618088	4.7442	0.000219063	0.00322886
Smp_137750.1	-0.627289	4.68645	0.000219226	0.00322886
SmLINC005909-IBu	1.70972	1.56715	0.000220171	0.00323794
Smp_247410.2	0.88983	5.86938	0.000220301	0.00323794
Smp_346170.3	-1.58842	2.8715	0.000220962	0.00324429
Smp_032120.1	0.859216	4.63858	0.0002213	0.00324588
Smp_017290.1	-0.446212	5.70646	0.000221549	0.00324618
Smp_106130.1	-0.420256	8.71192	0.000223008	0.00326417
SmLINC169189-IBu	3.64087	-0.00377724	0.000223775	0.00327202
Smp_041750.1	0.5371	6.39698	0.000224602	0.00328072
Smp_123260.1	1.82134	5.42904	0.000225328	0.00328793
Smp_031190.2	-0.794387	4.35662	0.000225824	0.00329178
Smp_305870.1	1.37466	5.68611	0.000227636	0.00330993
Smp_131390.1	0.668412	6.16677	0.00022797	0.00330993
Smp_135860.1	-0.604414	5.35943	0.000228005	0.00330993
Smp_247850.1	-0.787241	5.78992	0.000228918	0.0033173
Smp_125740.2	-0.915564	4.63486	0.000228981	0.0033173
Smp_340230.1	0.314992	8.49141	0.000229288	0.00331835
Smp_054200.1	-0.341741	7.14642	0.000229709	0.00332104
Smp_047620.1	-0.637636	4.20672	0.000230427	0.00332802
Smp_066890.1	-0.367563	8.71839	0.000231786	0.00334353
Smp_203090.1	2.04986	5.74716	0.000232211	0.00334353
Smp_128600.2	1.01008	4.06695	0.000232214	0.00334353
Smp_086450.1	-0.320835	7.59935	0.000232446	0.00334353
Smp_063640.1	-0.302964	7.95299	0.00023361	0.00335687
Smp_004200.1	-0.281963	7.05361	0.000234456	0.0033656
Smp_340900.1	-0.404403	8.54679	0.00023514	0.00337201
Smp_161210.1	-0.734324	4.59682	0.000235387	0.00337213
Smp_171460.1	0.877035	3.53165	0.000236087	0.00337874
Smp_156400.2	1.85975	1.93812	0.000237217	0.00338812
Smp_031070.2	0.769019	4.9014	0.000237221	0.00338812
Smp_098560.1	-0.482442	5.95095	0.000237675	0.00338891
Smp_242140.2	12.69	2.19314	0.000237755	0.00338891
Smp_347680.1	0.312071	6.88819	0.000238452	0.00339542
SmLINC135287-IBu	3.07453	0.492853	0.000240421	0.00341707
Smp_086530.1	-1.51154	10.3983	0.000240455	0.00341707
Smp_332010.1	-0.482922	7.00055	0.000241155	0.00342358
Smp_063300.1	-0.433122	8.37096	0.000242476	0.00343889
Smp_130110.1	0.504621	5.56033	0.000243082	0.00344403
Smp_173210.1	0.389763	6.09329	0.000243551	0.00344721
Smp_128220.1	-0.70327	6.27075	0.0002447	0.00346003
Smp_092750.1	-0.278206	8.54311	0.000245395	0.00346639
Smp_207020.1	0.361176	6.61432	0.000246072	0.00347249
Smp_075000.1	0.550326	4.841	0.000246672	0.00347748
Smp_043110.1	-0.689282	7.45678	0.00024784	0.0034885
SmLNCA171147-IBu	6.64016	-0.678626	0.000247946	0.0034885
Smp_066590.2	-0.380624	6.04279	0.000249083	0.00350048
Smp_027340.1	0.668554	6.24553	0.000249292	0.00350048
Smp_026560.2	-0.522044	8.93417	0.000249559	0.00350076
SmLNCS145206-IBu	2.78062	0.270331	0.000249933	0.0035014
Smp_326040.1	-0.53666	6.58131	0.0002501	0.0035014
Smp_153340.1	-0.367021	7.49918	0.000250781	0.00350746
Smp_247950.1	1.54615	3.45067	0.000251372	0.00350865
Smp_167000.1	-0.615608	4.38552	0.000251444	0.00350865
Smp_035800.1	-0.394956	7.15677	0.00025161	0.00350865
Smp_343910.1	-0.352782	6.40866	0.000252371	0.00351181
Smp_181270.2	0.609153	4.30959	0.000252716	0.00351181
Smp_028200.1	0.439076	7.28622	0.000252819	0.00351181
Smp_246710.1	0.841433	6.32123	0.000252828	0.00351181
Smp_160540.1	-0.618514	5.33554	0.000253523	0.003518
SmLINC118928-IBu	1.05872	3.22588	0.000254883	0.00353341
Smp_045920.2	-0.497315	5.32135	0.000255683	0.00354104
Smp_140520.3	1.75594	3.41663	0.000256118	0.00354359
Smp_245160.1	-1.44696	1.65046	0.000256534	0.00354587
Smp_132850.1	0.675649	6.03298	0.000257816	0.00355666
Smp_132850.2	0.675649	6.03298	0.000257816	0.00355666
Smp_063180.1	0.433908	7.74267	0.000260068	0.00358371
Smp_322410.1	-0.389434	7.98487	0.000260283	0.00358371
Smp_202400.1	0.534316	5.31394	0.000261116	0.00358761
Smp_323570.1	-1.31804	3.82481	0.000261607	0.00358761
Smp_042400.1	-0.425768	7.82076	0.000261646	0.00358761
Smp_201950.1	1.92171	2.18279	0.000261775	0.00358761
Smp_156960.1	-1.72589	8.13987	0.000261834	0.00358761
Smp_149070.1	-0.420386	5.53211	0.000262216	0.00358937
Smp_172580.1	0.350264	6.54101	0.000264711	0.00361928
Smp_083990.1	-0.483005	7.10279	0.000264913	0.00361928
Smp_307450.1	1.29507	6.4263	0.000265964	0.00362919
SmLNCA154179-IBu	-2.14862	1.96667	0.000266151	0.00362919
Smp_064860.1	-0.319882	9.12883	0.000268592	0.00365896
Smp_067780.1	-0.654726	4.51187	0.000271432	0.00369408
Smp_198660.1	0.615117	4.31904	0.000271894	0.00369682
Smp_016250.1	-0.579729	4.79312	0.000272425	0.00369918
Smp_073880.1	-0.283121	9.10685	0.00027259	0.00369918
Smp_302740.3	0.509217	6.00209	0.000272895	0.00369976
Smp_102240.1	0.485953	7.11526	0.000274021	0.00371148
Smp_165230.1	2.68689	3.09247	0.000274545	0.00371502
Smp_150340.1	-0.663261	5.5939	0.000275948	0.00373044
Smp_145700.1	0.388465	8.18689	0.000276269	0.00373121
Smp_335730.1	-1.16494	3.38258	0.000277003	0.00373757
Smp_041600.1	-0.331519	7.1833	0.000277524	0.00374103
Smp_334160.1	-0.635304	4.44549	0.00027884	0.00375519
Smp_246410.1	0.425303	6.92534	0.000280242	0.00376388
Smp_096480.1	-0.874171	3.56251	0.000280341	0.00376388
Smp_063390.1	-0.548675	4.7469	0.000280358	0.00376388
Smp_103090.1	0.452952	6.43732	0.000280636	0.00376388
Smp_085500.1	-0.370642	6.24419	0.000280815	0.00376388
Smp_127220.1	1.06493	2.93604	0.000281321	0.00376709
Smp_246870.1	0.609113	5.71956	0.000281785	0.00376973
Smp_028070.1	0.380556	7.00737	0.000282521	0.00377278
Smp_170320.1	-1.0157	2.94449	0.000282545	0.00377278
Smp_003410.1	-0.369879	8.79888	0.000283028	0.00377567
Smp_141360.1	-0.560374	6.40326	0.000283631	0.00378014
Smp_068500.1	-0.685294	7.31958	0.000284508	0.00378827
Smp_049170.1	0.32727	7.5864	0.000284978	0.00379096
Smp_189960.1	0.714805	7.06462	0.000285325	0.00379201
Smp_156740.1	1.74288	3.37273	0.000285725	0.00379376
Smp_073590.1	-0.300908	8.38041	0.000286377	0.00379886
Smp_035250.1	-1.25323	1.9673	0.000287598	0.00380888
Smp_097380.1	-0.340001	8.09999	0.000287878	0.00380888
SmLINC105299-IBu	3.58714	0.151194	0.00028794	0.00380888
Smp_337010.1	0.56085	4.94463	0.000288263	0.00380959
Smp_073690.1	-0.290828	6.20025	0.000288745	0.00381241
Smp_162080.1	0.551873	6.5053	0.000290382	0.00383044
Smp_132850.3	0.702408	4.79399	0.000290663	0.00383059
Smp_167860.3	0.902028	4.60982	0.000291391	0.00383135
Smp_333600.1	0.687365	5.99555	0.000291492	0.00383135
Smp_121600.3	1.21716	3.50765	0.000291534	0.00383135
SmLINC100002121	0.440933	4.84643	0.000293985	0.00385648
Smp_332860.1	0.406226	7.29478	0.000293991	0.00385648
Smp_007550.1	-0.803086	7.73702	0.0002954	0.00386802
Smp_040510.1	-0.724329	6.14725	0.000295416	0.00386802
Smp_162520.1	0.539556	6.0268	0.000296676	0.00388091
Smp_113740.1	-0.377973	5.52938	0.000297679	0.00389044
Smp_342940.1	1.06343	2.47796	0.000297981	0.0038908
Smp_213420.1	-0.96804	2.54588	0.00029846	0.00389346
Smp_345470.1	-0.957603	4.15794	0.000299607	0.00390483
Smp_123830.1	-1.0249	9.25319	0.000300451	0.00391165
Smp_075420.1	-0.467734	7.43181	0.000300782	0.00391165
Smp_162290.1	-1.24241	3.49129	0.00030096	0.00391165
Smp_079000.1	-0.312678	7.66169	0.000301435	0.00391423
Smp_041650.1	-0.386554	7.41682	0.000302802	0.0039216
Smp_161350.1	-0.367242	6.11092	0.000303072	0.0039216
Smp_018580.1	-0.457672	4.63888	0.000303174	0.0039216
Smp_161080.1	1.14514	5.15222	0.000303354	0.0039216
Smp_340380.1	0.708748	7.18725	0.000303388	0.0039216
Smp_013440.1	0.399888	7.08807	0.000303842	0.00392389
Smp_203390.1	0.736689	5.37685	0.000304531	0.00392797
Smp_102810.1	-0.500691	5.67929	0.000304971	0.00392797
Smp_170030.1	-0.395054	6.60079	0.000304991	0.00392797
Smp_099150.1	0.601698	7.89988	0.000306114	0.00393762
Smp_105690.1	0.445992	6.55421	0.000306607	0.00393762
Smp_301620.1	-0.363306	9.77276	0.000306852	0.00393762
SmLINC127679-IBu	0.97174	2.9555	0.000306853	0.00393762
Smp_102690.1	-0.349804	7.70643	0.000307483	0.00393889
Smp_303290.1	4.58661	3.50931	0.000307508	0.00393889
SmLINC170210-IBu	-0.525376	6.56502	0.000309413	0.00395375
Smp_073280.3	-1.15952	2.78069	0.000309707	0.00395375
Smp_316390.1	-0.84087	5.78533	0.000309741	0.00395375
Smp_302290.1	1.67064	6.30239	0.000309786	0.00395375
Smp_156670.1	0.321983	7.52589	0.000310824	0.00396342
Smp_074020.1	-0.267607	7.61851	0.000313303	0.00398711
Smp_346920.1	0.367323	6.47291	0.000313464	0.00398711
Smp_043120.1	-0.351223	9.66128	0.000313526	0.00398711
Smp_154680.1	-1.28181	3.42131	0.000314608	0.00399728
Smp_135280.1	0.297474	7.89064	0.000314937	0.00399786
Smp_078780.1	-0.319016	7.53087	0.000315608	0.00400027
Smp_179200.1	-2.15026	-0.0387811	0.000315692	0.00400027
Smp_343420.1	-2.09391	1.29109	0.000316846	0.00401131
Smp_135020.1	-0.75755	5.65623	0.000321142	0.00406005
Smp_084460.1	-0.337662	8.50052	0.00032127	0.00406005
Smp_137580.1	-0.625035	8.0942	0.000321563	0.00406013
Smp_152440.2	0.501166	5.47211	0.000321896	0.0040607
Smp_007510.1	0.64199	4.49553	0.000322261	0.0040617
Smp_061200.1	-0.340449	8.23991	0.000323324	0.00407147
SmLINC141894-IBu	3.9538	0.302964	0.000324094	0.00407753
Smp_247540.1	0.444115	6.02553	0.000324962	0.00408234
Smp_123570.2	1.5187	2.59608	0.000325052	0.00408234
Smp_134020.1	0.426947	6.59605	0.000326743	0.00409993
Smp_316220.1	3.02052	2.67205	0.000327043	0.00410001
Smp_127500.3	1.1569	4.43601	0.000327421	0.00410001
Smp_019280.1	-0.729857	5.18459	0.000327878	0.00410001
Smp_331910.1	-0.891252	5.93616	0.000327908	0.00410001
Smp_060820.1	-0.294845	6.7071	0.000328211	0.00410018
Smp_127460.1	-0.615072	4.19278	0.000329383	0.00411119
Smp_045220.1	-0.503581	10.0635	0.00033062	0.00412198
Smp_158600.1	-0.312908	8.00389	0.000331117	0.00412198
Smp_034840.1	-0.357246	11.0836	0.000331121	0.00412198
Smp_330330.1	-0.495942	6.43108	0.000332954	0.00414115
Smp_124440.1	0.413215	7.37672	0.000337992	0.00420012
Smp_120620.1	0.918917	3.51716	0.000338528	0.0042018
Smp_310080.1	0.473537	7.17281	0.00033897	0.0042018
Smp_344100.1	0.406766	6.21278	0.000339225	0.0042018
Smp_157350.1	0.450631	7.07344	0.000339314	0.0042018
Smp_138680.1	0.486935	7.54764	0.000340713	0.00421087
Smp_068840.1	-0.450893	5.66622	0.000340853	0.00421087
Smp_168330.1	-0.410653	6.08133	0.000341237	0.00421087
Smp_333730.1	0.622431	4.75069	0.000341237	0.00421087
Smp_345210.3	2.01391	1.5979	0.000341694	0.00421283
Smp_246920.1	0.691769	5.18219	0.000342165	0.00421497
Smp_033670.1	-0.296426	8.02783	0.000342587	0.0042165
Smp_067480.2	1.60037	4.54287	0.000344758	0.0042288
Smp_140560.1	-1.8808	6.18333	0.000344794	0.0042288
Smp_127280.1	0.524094	5.48589	0.000344822	0.0042288
SmLINC142755-IBu	2.3773	1.912	0.00034508	0.0042288
Smp_171540.2	-0.313297	7.53016	0.000347106	0.00424994
SmLNCS143325-IBu	0.972027	3.53831	0.000348389	0.00426197
Smp_021590.1	-0.732694	3.7718	0.00034876	0.00426283
Smp_172420.2	0.94612	6.27792	0.000350775	0.00428129
Smp_098890.1	0.474262	6.58197	0.000350876	0.00428129
Smp_045510.1	-0.2786	7.21446	0.000351203	0.00428159
Smp_213290.2	-0.819332	5.49524	0.000353253	0.00430287
Smp_245170.1	1.2365	3.12098	0.000353669	0.00430424
Smp_327950.2	-2.01927	2.55454	0.000359288	0.00436887
Smp_092490.1	-0.413518	6.9336	0.000360243	0.00437672
Smp_153920.1	0.621977	5.90592	0.000361653	0.00438717
Smp_200190.1	-0.717648	10.0444	0.000361877	0.00438717
Smp_176200.1	-0.316914	8.36258	0.000362033	0.00438717
Smp_068440.1	0.291744	8.01149	0.000362704	0.00438838
Smp_212870.1	-0.46061	5.40449	0.000362753	0.00438838
Smp_160760.1	0.368358	5.92463	0.00036389	0.00439354
Smp_074560.2	0.86495	5.77686	0.000364195	0.00439354
Smp_245600.1	1.19908	4.63944	0.000364201	0.00439354
Smp_061870.1	-0.27368	7.64416	0.000364585	0.00439354
Smp_143740.1	-0.704782	4.54642	0.000364731	0.00439354
Smp_248160.1	0.559089	6.42375	0.000367392	0.00442182
Smp_032060.1	-0.304288	6.89603	0.000368049	0.00442597
Smp_171600.1	0.476237	7.3414	0.000368963	0.0044332
Smp_003610.1	0.343472	7.2817	0.000370542	0.00444839
Smp_153870.1	0.302877	7.27005	0.000373257	0.00447719
Smp_334670.1	1.96996	2.16694	0.000374128	0.00448189
Smp_139340.1	-0.33654	6.72107	0.000374282	0.00448189
Smp_125050.1	0.434552	6.04449	0.000376707	0.00450711
Smp_134440.1	-0.682471	6.88138	0.000379144	0.00452539
Smp_153990.4	-0.394266	5.53884	0.000379241	0.00452539
Smp_074510.1	0.643281	5.41052	0.000379514	0.00452539
Smp_335110.1	-0.447512	5.73537	0.000380781	0.00453613
Smp_340040.1	-2.43273	1.07582	0.000381107	0.00453613
Smp_242230.1	0.419515	5.37871	0.000381562	0.00453613
Smp_061570.1	0.597441	4.60688	0.000381696	0.00453613
Smp_147590.4	2.16811	2.6611	0.00038268	0.004544
Smp_158360.1	-1.12942	3.07751	0.000383501	0.00454994
Smp_140420.1	0.401711	7.01212	0.000387027	0.00458792
Smp_055630.1	0.755292	3.64497	0.000388849	0.00460566
Smp_074000.1	-0.31014	11.46	0.000392787	0.00464842
Smp_042160.1	-0.462386	12.7658	0.000396171	0.00468454
Smp_058620.1	0.326948	5.94211	0.000396764	0.00468764
Smp_024660.1	0.737862	5.00871	0.000397216	0.00468907
SmLNCA165947-IBu	-2.96026	-0.740797	0.000398939	0.00470549
Smp_158030.1	0.322939	6.27975	0.000400095	0.00471519
SmLNCA135675-IBu	-2.11518	0.293987	0.000400635	0.00471762
Smp_173150.1	-0.812702	8.34492	0.000401115	0.00471935
Smp_179930.1	0.588325	4.56129	0.000402128	0.00472275
SmLINC152104-IBu	6.57174	-0.543062	0.000402532	0.00472275
Smp_164880.1	0.272037	8.12512	0.000402848	0.00472275
Smp_089880.1	-0.356555	5.1994	0.00040299	0.00472275
Smp_096760.1	-0.353932	9.75703	0.000403072	0.00472275
Smp_319540.1	-1.15189	3.88148	0.000404999	0.00474141
Smp_126620.1	-0.515823	4.882	0.000405432	0.00474255
Smp_003440.1	-0.910658	5.97652	0.000406771	0.00475428
Smp_001170.2	-0.346865	7.88639	0.000407566	0.00475616
Smp_078700.1	0.542082	5.20034	0.000407925	0.00475616
Smp_088950.1	0.347801	7.52143	0.00040794	0.00475616
Smp_009830.1	-0.424006	6.84041	0.000409857	0.00477458
Smp_153700.1	-1.02695	8.83103	0.000410811	0.00478176
Smp_154040.1	0.349315	7.86773	0.000411433	0.00478506
Smp_320360.1	-2.86597	0.222224	0.00041267	0.00479053
Smp_083720.1	-0.370131	7.70369	0.00041281	0.00479053
Smp_028140.1	0.311264	6.03856	0.000412918	0.00479053
Smp_062070.1	-0.463988	8.16133	0.00041446	0.00480448
SmLNCA144407-IBu	1.88106	2.82629	0.000415095	0.0048046
Smp_196040.2	0.952312	4.30283	0.00041546	0.0048046
Smp_179460.1	-0.285468	8.28968	0.000415489	0.0048046
Smp_267140.1	-0.39973	6.89757	0.00041591	0.00480502
Smp_169660.1	-0.765004	5.65555	0.000416205	0.00480502
Smp_147820.2	-0.352096	6.47586	0.000418317	0.00482308
SmLNCA112669-IBu	-4.0327	-0.938531	0.00041845	0.00482308
SmLINC131336-IBu	1.55487	2.19029	0.000420466	0.00484237
Smp_030220.1	0.338411	6.6714	0.000421704	0.0048524
Smp_063090.1	-0.395561	7.92917	0.000422022	0.0048524
Smp_015880.1	-0.456175	4.83162	0.000422879	0.00485477
Smp_035790.1	-0.343729	8.07225	0.000423165	0.00485477
Smp_106110.1	0.73226	5.61662	0.000423257	0.00485477
Smp_344800.1	-0.702423	9.82386	0.000423886	0.00485804
Smp_014290.2	-0.360745	6.45899	0.000428682	0.00490835
Smp_345100.1	2.57688	1.65661	0.000428969	0.00490835
SmLINC002913-IBu	2.58177	-0.0280454	0.000429805	0.00491394
Smp_074150.1	-0.618674	7.58231	0.000430449	0.00491514
SmLINC109195-IBu	2.69822	0.232093	0.000430604	0.00491514
Smp_019100.1	0.348656	7.22304	0.000431006	0.00491576
Smp_073140.1	-0.31101	6.6775	0.000432886	0.00493323
Smp_042020.1	-0.654563	8.14635	0.000434626	0.00494725
Smp_214240.1	0.560221	6.03171	0.000434816	0.00494725
Smp_267020.1	-0.243605	7.49387	0.000435618	0.00495119
Smp_169260.1	-0.85167	6.79497	0.000435861	0.00495119
Smp_159150.2	0.342232	6.73821	0.000441035	0.00500595
Smp_034680.1	-1.95451	0.904181	0.000442215	0.00501287
Smp_211170.1	0.508727	5.33737	0.000442354	0.00501287
Smp_121390.1	-0.89046	4.87918	0.000443277	0.00501565
Smp_166800.2	1.15167	3.8698	0.000443308	0.00501565
Smp_036940.1	-0.322675	6.79958	0.000444035	0.00501987
Smp_133110.2	0.305507	6.36318	0.000445195	0.00502896
Smp_152570.1	0.291728	6.37539	0.000446249	0.00503685
Smp_175740.2	-0.281243	8.77664	0.00044698	0.00503966
Smp_197370.1	-0.932344	10.1164	0.000447709	0.00503966
Smp_303250.1	0.584564	7.03189	0.000447783	0.00503966
Smp_318920.1	-0.909983	4.03198	0.000447922	0.00503966
Smp_168000.1	0.694731	4.30556	0.000449766	0.00505292
Smp_007300.1	-0.345807	8.72776	0.000450111	0.00505292
Smp_129870.1	-0.977658	3.45578	0.000450171	0.00505292
Smp_159100.3	0.470063	6.68717	0.000451006	0.00505306
Smp_201330.1	2.17807	3.16407	0.000451169	0.00505306
Smp_100110.1	-0.351716	6.49446	0.000451256	0.00505306
Smp_007260.1	0.37155	9.8312	0.00045174	0.00505422
Smp_125130.1	-0.646569	4.26538	0.000452073	0.00505422
Smp_035560.1	0.78601	8.50967	0.00045387	0.00507031
Smp_011150.1	0.913177	4.96656	0.000455047	0.00507945
Smp_084090.1	-0.561718	7.02444	0.000456412	0.00509067
Smp_032480.1	0.365495	6.38764	0.000460125	0.00512549
Smp_180240.1	-0.488365	7.13939	0.000460259	0.00512549
Smp_005160.3	0.573543	6.83681	0.000461389	0.0051315
Smp_341660.1	-0.656947	8.29414	0.000461523	0.0051315
Smp_176260.1	-0.715433	4.27042	0.00046329	0.00514237
Smp_125730.2	1.51693	5.34622	0.000463428	0.00514237
Smp_180790.1	-0.393641	5.13751	0.00046387	0.00514237
Smp_016380.1	0.832942	5.19899	0.000463954	0.00514237
Smp_330160.1	-0.992254	5.87008	0.000465945	0.0051604
Smp_033530.1	-0.242565	8.25191	0.000472019	0.00522358
Smp_267120.1	-0.45472	5.82788	0.000473325	0.00523394
Smp_203630.1	0.679294	6.82425	0.000474138	0.00523884
Smp_129610.1	-1.13527	3.50331	0.000477259	0.00526921
Smp_126820.1	-0.986224	2.30365	0.000479065	0.00528503
Smp_327770.1	-1.22384	6.71944	0.000479662	0.00528749
Smp_064800.1	0.389214	5.30412	0.000480424	0.00529177
Smp_124240.2	-1.40979	7.03101	0.000481458	0.00529904
Smp_170430.1	-0.881537	3.19879	0.000484329	0.00532649
Smp_163380.1	-0.544239	4.77418	0.00048493	0.00532896
Smp_076660.1	-0.31752	7.11421	0.000487382	0.00535175
Smp_180680.1	-0.668731	4.50842	0.000487838	0.00535182
SmLNCA143211-IBu	2.21714	1.46063	0.000488225	0.00535182
Smp_342020.2	1.50011	4.5854	0.000488523	0.00535182
Smp_095360.2	-0.508442	9.44643	0.000494673	0.00541501
Smp_168170.1	-0.341548	6.03688	0.000496361	0.00542928
Smp_082810.1	-0.322767	8.42763	0.000496849	0.00543042
Smp_335940.1	4.29972	2.52361	0.000498789	0.00544742
Smp_047330.3	0.76838	3.51296	0.000499462	0.00545057
Smp_191360.1	-0.283754	6.61327	0.000501304	0.00546542
Smp_321360.1	-1.49373	1.62815	0.000501596	0.00546542
Smp_300470.1	2.5548	1.25116	0.00050238	0.00546976
Smp_031570.1	-0.336359	8.30383	0.000503252	0.00547504
Smp_065150.1	-0.576176	4.01847	0.000505005	0.00548989
Smp_099030.1	-0.273781	8.42466	0.000507072	0.00550813
Smp_212200.2	0.380326	6.66666	0.000508038	0.00551112
Smp_080110.1	-0.412196	6.15349	0.000508607	0.00551112
Smp_039640.1	0.306373	7.01828	0.000508687	0.00551112
SmLNCA168342-IBu	2.60805	0.859205	0.000508904	0.00551112
Smp_082710.1	-0.275433	7.36177	0.00051028	0.00552179
SmLNCA168214-IBu	1.76004	0.971998	0.000510745	0.0055226
SmLINC155104-IBu	3.0878	1.15187	0.000511241	0.00552374
Smp_200900.1	0.838267	5.85413	0.000511827	0.00552586
Smp_333340.1	-1.44385	2.35892	0.000514683	0.00555246
Smp_092150.1	1.88525	2.51404	0.000515127	0.00555301
Smp_133700.1	0.528217	5.97537	0.00051562	0.00555398
Smp_074560.3	1.10476	7.12508	0.000516486	0.00555398
Smp_150640.1	-0.523524	8.3433	0.000516728	0.00555398
SmLINC109488-IBu	1.2515	2.36661	0.000516786	0.00555398
Smp_125480.1	-0.52025	7.31441	0.000517733	0.00555893
Smp_096010.1	0.324461	5.93982	0.000518032	0.00555893
Smp_037530.1	-0.34181	6.40217	0.000521207	0.0055879
Smp_317690.1	3.46058	1.31072	0.000521522	0.0055879
Smp_111980.1	-0.611201	4.375	0.000522337	0.0055924
Smp_053640.1	0.783876	4.21707	0.000523994	0.00560314
Smp_126480.1	-0.860014	8.73812	0.000524131	0.00560314
Smp_140430.1	0.543984	4.52935	0.000527143	0.00563108
Smp_315130.1	1.71183	1.31092	0.000527909	0.00563501
Smp_035110.1	0.343389	6.81908	0.000531063	0.00566388
Smp_155750.1	-0.335699	6.39034	0.000531767	0.00566388
Smp_038830.1	0.374002	5.94361	0.000531814	0.00566388
Smp_145320.5	-1.56366	1.25917	0.000534539	0.00568582
Smp_082940.1	-0.289593	7.3659	0.000534677	0.00568582
Smp_198890.1	0.804588	4.04037	0.000535713	0.00569256
Smp_347110.1	-0.295251	9.2101	0.000536884	0.00570072
Smp_194030.1	0.524044	6.01573	0.000538408	0.00570892
Smp_057650.1	0.581782	9.00889	0.000538463	0.00570892
Smp_105410.1	-0.672785	8.21601	0.000539619	0.0057169
Smp_342170.1	0.303005	6.85811	0.000541764	0.00573369
Smp_124050.2	-2.51415	6.55172	0.000542015	0.00573369
Smp_326580.2	-2.04685	3.6249	0.000544873	0.00575962
SmLNCA108483-IBu	-0.515667	4.55771	0.000545378	0.00576066
Smp_064250.1	0.54276	5.38799	0.000548719	0.00579162
Smp_132180.3	0.631066	4.20986	0.000549669	0.00579733
Smp_304800.5	0.568659	5.66054	0.000551688	0.00581429
Smp_241860.1	-0.345108	5.53637	0.00055281	0.00582178
Smp_046890.1	0.856324	5.69349	0.000553265	0.00582224
Smp_105100.1	-0.309393	7.02689	0.000553777	0.0058233
SmLINC126337-IBu	2.79273	0.0673191	0.000555409	0.00583612
Smp_212360.1	-9.31641	2.36026	0.000558274	0.00586188
Smp_034300.1	0.752702	4.17743	0.000559466	0.00587004
SmLINC142669-IBu	-2.67356	-0.757756	0.000562205	0.00589441
Smp_029890.1	-0.286813	8.06703	0.000562672	0.00589494
Smp_141010.2	1.417	5.94713	0.000563491	0.00589915
Smp_147750.1	-1.02077	2.3789	0.000564064	0.00590079
Smp_015670.1	-0.514607	5.14413	0.000565451	0.00590631
Smp_014080.1	-0.834965	3.1318	0.000565742	0.00590631
Smp_054840.1	-0.388397	5.63886	0.000566177	0.00590631
Smp_006760.2	-1.80118	1.78062	0.000566261	0.00590631
Smp_095520.1	-1.01914	8.73014	0.000567448	0.00591433
Smp_161170.1	0.258444	6.35461	0.000568151	0.0059173
Smp_147670.1	0.848668	5.56781	0.000569005	0.00592017
Smp_091360.1	0.438489	6.06356	0.000569264	0.00592017
Smp_043990.1	-0.396768	8.71384	0.000569935	0.00592145
Smp_244020.1	0.440509	6.22066	0.000571404	0.00592145
Smp_315830.2	1.00854	3.10268	0.000571486	0.00592145
Smp_158720.3	0.923902	3.92841	0.00057161	0.00592145
Smp_143060.1	-0.287774	7.18371	0.000571754	0.00592145
Smp_302850.2	-0.804764	5.89517	0.000571896	0.00592145
Smp_157670.1	-0.864835	6.11564	0.00057291	0.00592761
Smp_347960.1	0.406591	6.21858	0.000573872	0.00593323
Smp_341030.1	0.528264	5.1615	0.000575558	0.00594234
Smp_124510.1	-1.0805	3.16102	0.000575593	0.00594234
Smp_330860.1	-1.16914	1.72139	0.000576499	0.00594735
Smp_025740.1	-0.618203	6.8934	0.000582687	0.00600681
Smp_083710.1	-0.646403	3.83742	0.000583595	0.00601179
Smp_082820.1	0.319827	6.4589	0.000587393	0.00604184
Smp_105960.1	0.416235	6.2644	0.000587425	0.00604184
Smp_053800.1	-0.409443	5.51634	0.000587793	0.00604184
Smp_171820.1	-0.38962	8.37013	0.000588337	0.00604305
Smp_335180.2	1.06665	2.82599	0.00059015	0.00605728
SmLINC103762-IBu	-1.84068	0.0151595	0.000591686	0.00606191
Smp_137300.1	-1.83799	1.73005	0.000592199	0.00606191
Smp_326530.1	-0.90093	4.96084	0.000592449	0.00606191
Smp_042980.1	-0.452338	5.5252	0.00059314	0.00606191
SmLINC101519-IBu	2.70835	1.86589	0.000593141	0.00606191
Smp_091230.1	-0.40368	6.65756	0.000593172	0.00606191
Smp_076950.1	-0.242979	7.10983	0.000594289	0.00606637
Smp_102820.1	-0.285271	6.39771	0.000594465	0.00606637
Smp_010280.1	0.361812	6.27558	0.000595742	0.00607502
SmLINC106006-IBu	2.96558	-0.202267	0.000597366	0.0060861
SmLINC130971-IBu	-1.19008	3.51375	0.000597688	0.0060861
Smp_143830.1	2.49137	3.47073	0.000598339	0.00608835
Smp_141890.1	0.617767	6.2414	0.000600023	0.00610087
Smp_060080.1	-0.519853	6.47524	0.000600432	0.00610087
Smp_167630.2	-0.940367	6.37435	0.00060247	0.00611719
Smp_128370.3	0.772362	7.5665	0.000605205	0.0061368
Smp_006860.2	-1.22948	5.31959	0.000605352	0.0061368
Smp_030000.1	1.14203	8.92086	0.000605702	0.0061368
Smp_164590.1	-1.06359	9.15437	0.000611043	0.00617814
Smp_000150.1	0.436178	6.61879	0.000611061	0.00617814
Smp_022470.1	-0.530619	4.95037	0.000611092	0.00617814
Smp_073400.1	-0.287764	9.50788	0.000611854	0.00618143
Smp_171020.1	-0.741428	7.59467	0.000613445	0.00619308
Smp_174690.1	-0.572652	5.477	0.000615716	0.00621157
Smp_127840.2	9.24627	0.314255	0.000617322	0.00622335
Smp_055190.1	-0.440205	5.72441	0.00062126	0.00625859
Smp_214070.1	0.615057	5.87278	0.000623639	0.00627808
Smp_343400.1	-0.790699	3.0166	0.000625432	0.00629166
Smp_051640.2	0.515395	4.9904	0.000627544	0.00630528
Smp_149820.3	-1.15308	4.19757	0.000627677	0.00630528
Smp_152550.1	0.639473	5.09987	0.000630434	0.00632849
SmLINC165185-IBu	0.700526	4.50009	0.000631325	0.00633291
SmLINC128155-IBu	1.05402	3.09066	0.00063194	0.00633291
Smp_344130.1	-0.829281	3.08259	0.000632217	0.00633291
SmLNCA166575-IBu	3.48918	0.988081	0.000636084	0.00636369
Smp_034120.2	0.813684	4.71002	0.000636542	0.00636369
Smp_071250.1	0.263228	8.90414	0.00063673	0.00636369
Smp_074260.1	-0.448132	5.66425	0.000637088	0.00636369
Smp_165150.1	-1.12411	3.93516	0.00063918	0.00638008
Smp_346990.1	-0.581793	5.28846	0.000639696	0.00638073
Smp_171860.7	0.401364	6.29678	0.000641355	0.00638851
Smp_127190.1	0.623522	4.85858	0.000641379	0.00638851
Smp_034610.1	1.09112	2.78664	0.000642609	0.00639626
Smp_163330.1	0.363176	5.00857	0.000643087	0.00639653
SmLNCA163296-IBu	-4.79053	-0.606984	0.000643763	0.00639875
Smp_084140.1	0.303152	6.63754	0.000644411	0.0064007
Smp_152270.1	-0.359633	6.18938	0.000646235	0.00641432
Smp_141680.1	-0.590906	8.22152	0.000649396	0.00644117
Smp_160360.1	-1.14452	6.78136	0.000652257	0.00646502
Smp_048560.2	-0.379044	8.35628	0.000654086	0.00647861
Smp_164190.1	0.668189	4.02301	0.000655174	0.00648485
Smp_156270.1	-0.228469	7.55097	0.000655668	0.00648521
Smp_334260.1	0.404277	6.82137	0.000661468	0.006538
SmLNCA122578-IBu	-7.6774	-0.236712	0.000664876	0.00656408
Smp_304910.1	0.428769	4.61626	0.000665266	0.00656408
Smp_135560.1	-0.997426	10.4758	0.000665498	0.00656408
Smp_070780.1	-0.443054	8.02107	0.000670222	0.00660608
Smp_333460.1	-0.524476	5.1467	0.000671328	0.00661237
Smp_139540.1	0.590844	5.47517	0.000672043	0.00661481
SmLINC003067-IBu	-3.93983	1.52161	0.000672994	0.0066156
Smp_165200.2	1.23598	3.42655	0.000673058	0.0066156
Smp_144490.2	0.4758	6.02032	0.000675165	0.00662702
Smp_080610.1	-0.30632	6.28889	0.000676083	0.00662702
Smp_308600.1	0.40506	7.32774	0.000676092	0.00662702
Smp_007960.1	-0.251191	6.32499	0.000677443	0.00662974
Smp_063420.1	-0.275587	8.80911	0.000677627	0.00662974
Smp_078610.1	0.312083	7.55893	0.000677889	0.00662974
Smp_026910.1	-0.301443	8.48724	0.000678244	0.00662974
Smp_124740.2	-1.59294	5.09007	0.000678947	0.00663203
SmLINC105861-IBu	1.70736	1.30084	0.000682793	0.006665
SmLINC110998-IBu	-3.06359	0.634131	0.000683681	0.00666907
Smp_213500.1	-0.39847	5.9474	0.000684801	0.0066754
SmLNCA106570-IBu	-1.7885	1.69201	0.000687753	0.00669903
Smp_210860.1	0.386786	4.96812	0.000688172	0.00669903
Smp_172810.1	0.650802	5.87348	0.000689412	0.00670649
SmLINC136524-IBu	7.81722	-0.717451	0.000692168	0.00672867
Smp_078800.1	0.283357	7.37325	0.000694034	0.00674218
Smp_049330.1	-0.386009	7.06249	0.000694698	0.006744
Smp_049240.1	2.59185	2.37537	0.000695454	0.00674605
Smp_025670.1	0.425659	5.46946	0.000695862	0.00674605
Smp_123720.1	1.30173	3.81513	0.000697057	0.006753
Smp_127520.1	1.15255	4.02315	0.000698009	0.00675474
Smp_081430.1	-1.19357	7.46344	0.00069819	0.00675474
Smp_083020.1	-0.613509	5.69028	0.00069965	0.00675979
Smp_156300.1	-0.918942	5.28077	0.000699984	0.00675979
Smp_169050.2	-0.651995	4.91164	0.00070032	0.00675979
Smp_125960.1	0.400093	6.971	0.000701701	0.00675979
Smp_136910.1	-0.426857	5.72056	0.000701778	0.00675979
Smp_000755.1	-0.419895	7.29658	0.000702051	0.00675979
Smp_153490.1	0.47172	6.15934	0.000702055	0.00675979
Smp_009310.1	-0.426833	10.6594	0.000705537	0.00678869
Smp_305460.1	1.19054	3.75601	0.000706424	0.00679261
Smp_194680.1	-0.267899	7.10983	0.000708179	0.00680477
Smp_144760.1	-0.246457	6.64071	0.00070865	0.00680477
Smp_034420.1	-0.312326	8.19946	0.000709921	0.00681235
Smp_334330.1	0.38829	6.87213	0.000710486	0.00681315
Smp_124850.1	0.328906	6.22081	0.000713436	0.00683681
Smp_017230.1	0.399549	5.94458	0.000714469	0.00684208
SmLNCA177347-IBu	1.12096	2.32665	0.000716985	0.00685939
Smp_077090.1	-0.237888	7.40151	0.000717298	0.00685939
Smp_129650.1	0.347153	6.12489	0.000717731	0.00685939
Smp_019680.2	0.305032	6.60863	0.000718605	0.00686034
Smp_022320.1	-0.298766	5.84805	0.000718799	0.00686034
Smp_145540.1	0.544882	5.18292	0.000720207	0.00686915
Smp_144440.1	-1.24563	8.8966	0.000721007	0.00687215
Smp_244300.1	0.802978	3.71475	0.000723439	0.00689068
Smp_040500.1	-0.363056	6.71238	0.000724909	0.00690004
Smp_146010.1	-0.567986	5.46717	0.000726326	0.00690889
Smp_163500.3	2.44564	2.58457	0.000728364	0.00692314
Smp_064280.1	-0.411526	5.0459	0.000728851	0.00692314
Smp_142820.1	1.37007	2.86073	0.000729292	0.00692314
Smp_126760.2	0.59325	4.70717	0.000735106	0.00697141
SmLINC166001-IBu	2.38908	0.913597	0.000735362	0.00697141
Smp_201130.1	-0.778796	4.23176	0.000738231	0.00699026
Smp_056440.1	-0.445117	7.91239	0.000738338	0.00699026
Smp_344520.1	2.77445	0.925287	0.000739865	0.00700004
Smp_068920.1	0.39314	7.89426	0.000740703	0.00700328
Smp_089870.1	-0.373545	7.92654	0.000744038	0.00703012
Smp_028050.1	-0.569109	4.17631	0.000746571	0.00704934
Smp_032780.1	-0.335818	6.29179	0.000747081	0.00704945
SmLINC114512-IBu	-1.49124	1.4547	0.000749337	0.00706383
Smp_017070.1	0.267554	7.94233	0.000749921	0.00706383
Smp_055200.2	-0.279913	7.98539	0.000750102	0.00706383
Smp_087930.2	0.766855	3.53382	0.000752979	0.00708622
Smp_149740.1	-0.866234	6.83813	0.000753576	0.00708712
SmLINC136518-IBu	3.01079	1.83789	0.000754242	0.00708842
Smp_344620.1	-1.19144	4.35824	0.000755301	0.00708842
Smp_332440.1	-1.94102	2.7047	0.00075606	0.00708842
Smp_166300.1	-0.772051	5.52146	0.000756266	0.00708842
Smp_301160.1	0.469188	7.00217	0.000756582	0.00708842
Smp_173110.1	0.611252	6.91307	0.000756719	0.00708842
Smp_001780.1	1.08413	2.27752	0.000758691	0.00710219
Smp_166930.1	-0.36712	7.55136	0.000761986	0.00712833
Smp_312610.1	-1.29887	2.79131	0.000763023	0.00713331
Smp_319500.1	-0.408329	5.45587	0.000764609	0.00714342
Smp_140550.1	-0.379044	5.57242	0.000765556	0.00714698
Smp_022340.1	-0.496043	8.31986	0.000766001	0.00714698
Smp_127990.1	0.721503	5.80385	0.000772015	0.00719836
Smp_003660.2	0.25224	7.67267	0.000776917	0.00723871
Smp_038530.1	0.354679	7.09601	0.000777683	0.00723871
Smp_139970.2	-0.937027	7.46598	0.000777877	0.00723871
Smp_244360.1	-0.787759	5.18076	0.000779053	0.00724489
Smp_312730.1	-1.14266	3.58401	0.000779662	0.00724579
Smp_213370.1	-0.406235	5.84189	0.00078311	0.00727306
Smp_067900.1	-0.314139	8.11139	0.000786406	0.00729531
Smp_245530.1	0.821755	3.22664	0.000786537	0.00729531
Smp_144450.1	0.69355	5.06925	0.000788323	0.00730709
Smp_161540.1	0.4049	4.98656	0.00078969	0.00731497
SmLINC125031-IBu	2.26869	0.901498	0.000790644	0.00731902
Smp_067490.1	0.514014	6.29081	0.000791266	0.00731999
Smp_213930.1	0.413367	6.05014	0.000795725	0.00735643
Smp_129100.2	-0.73807	2.94829	0.000797802	0.00736536
Smp_342000.1	-1.48557	3.37742	0.000798248	0.00736536
SmLINC157902-IBu	-6.96147	-0.250265	0.000798252	0.00736536
Smp_336900.1	-1.95654	4.86883	0.000799143	0.00736877
Smp_201820.1	0.420256	5.46486	0.000799762	0.00736969
Smp_345020.1	1.15072	3.19251	0.000801751	0.00737363
Smp_095630.1	-0.56993	8.37413	0.000801803	0.00737363
Smp_083150.1	-0.336454	6.59852	0.000802363	0.00737363
Smp_092320.2	0.293841	6.12932	0.000802742	0.00737363
Smp_336700.1	2.15323	3.62646	0.000803218	0.00737363
SmLINC148951-IBu	1.31009	3.5655	0.000803316	0.00737363
Smp_144840.1	-0.301087	7.25696	0.000805481	0.00738148
Smp_050520.2	-0.644389	4.11416	0.000805736	0.00738148
SmLINC157503-IBu	3.4399	-0.199293	0.000807367	0.00739164
Smp_128200.1	-0.668055	4.20363	0.000807974	0.00739242
Smp_003270.1	0.525246	5.43866	0.000811194	0.00741708
Smp_194160.1	-0.431275	7.01234	0.000814545	0.00744292
Smp_093220.1	-0.342749	7.37517	0.00081616	0.0074514
Smp_343170.1	-0.481452	4.16958	0.000816602	0.0074514
Smp_129120.2	-0.689812	5.38524	0.000817053	0.0074514
Smp_131460.1	-0.411238	7.42029	0.000818295	0.00745324
Smp_317130.1	-0.342727	6.52642	0.000818308	0.00745324
Smp_049520.1	-0.477033	7.92853	0.000819456	0.00745889
Smp_093740.1	0.288639	8.06765	0.000821308	0.00747095
Smp_244210.1	0.407965	5.78718	0.000822041	0.00747282
Smp_015480.2	-0.831988	5.8261	0.000825074	0.00749557
Smp_207030.1	0.320549	5.59074	0.000828198	0.00751716
Smp_132120.1	0.312994	6.05747	0.000828512	0.00751716
Smp_024110.2	-0.286216	7.03264	0.000829639	0.00752061
SmLINC140551-IBu	1.57185	1.15545	0.000829956	0.00752061
Smp_171000.1	-1.01767	1.95097	0.000832856	0.00753597
Smp_073620.1	-0.389177	6.93339	0.000832987	0.00753597
Smp_105210.1	0.436398	4.74633	0.000833248	0.00753597
Smp_342840.1	1.15548	3.95385	0.000834567	0.00754307
Smp_012440.1	-0.556062	9.25884	0.000838202	0.0075711
Smp_315900.2	0.676241	6.74274	0.00084073	0.00758909
Smp_073270.1	-0.48174	7.37186	0.000848163	0.00765131
Smp_150740.1	-0.57123	6.78327	0.000850684	0.00766916
Smp_171880.1	0.257039	7.45106	0.000851605	0.00767257
Smp_301320.1	-0.253116	6.63332	0.000855322	0.00770116
Smp_015980.1	-0.335368	7.17659	0.000866942	0.00780053
Smp_247220.1	1.10219	4.03778	0.00086746	0.00780053
Smp_210960.1	-0.369817	5.95826	0.000868865	0.0078051
Smp_328600.1	0.947852	5.97835	0.000869072	0.0078051
Smp_140580.3	-0.478965	4.59151	0.000870702	0.00781287
Smp_075870.1	-0.395788	7.87146	0.000871793	0.00781287
Smp_340940.1	0.506867	4.75507	0.000871987	0.00781287
Smp_008260.1	0.223718	6.99697	0.000872145	0.00781287
Smp_139140.1	6.43931	0.90199	0.000873592	0.00782089
Smp_163230.2	-0.426797	5.40499	0.000874517	0.00782422
Smp_132260.1	0.267226	6.29182	0.000876768	0.00783941
Smp_070170.1	0.312901	6.3508	0.000877607	0.00784038
Smp_347620.2	-1.01456	2.8147	0.000877985	0.00784038
Smp_316490.2	0.976485	6.0373	0.000880246	0.00785561
Smp_133340.1	-0.380834	6.32977	0.000881935	0.00785925
Smp_059210.2	0.387574	6.70012	0.000882586	0.00785925
Smp_213020.1	0.445419	5.22587	0.000882761	0.00785925
Smp_247770.1	-0.444567	4.50325	0.000882875	0.00785925
Smp_323640.1	1.48416	2.78966	0.000884111	0.00786531
Smp_040130.1	-0.312105	10.2742	0.000889553	0.00790765
Smp_139470.1	0.399479	5.758	0.000889988	0.00790765
Smp_211040.1	-0.451384	6.31941	0.00089469	0.00793894
Smp_021080.1	-0.253428	6.50889	0.000895168	0.00793894
Smp_147050.1	-0.297225	7.53025	0.000895192	0.00793894
Smp_142050.1	-0.848461	5.39558	0.00089599	0.00794098
Smp_213730.3	0.67529	5.31791	0.000896544	0.00794098
Smp_306140.2	-0.358717	5.93609	0.000897945	0.00794841
Smp_062900.2	4.71088	-0.989398	0.000905355	0.00800399
Smp_180150.1	0.514822	5.5471	0.000908852	0.00802665
Smp_067260.1	-0.778336	3.43037	0.000909052	0.00802665
Smp_084890.1	-0.576705	7.32451	0.000912174	0.0080492
Smp_035390.1	0.366842	6.23674	0.000914937	0.0080636
Smp_343740.1	-0.759932	10.1457	0.000914945	0.0080636
Smp_042300.1	-0.252463	8.27119	0.000917197	0.00807841
Smp_342240.1	0.367873	5.55076	0.000919284	0.00809176
Smp_168660.1	-0.235791	7.05298	0.000921372	0.0081051
Smp_157830.1	0.443361	4.95294	0.000926163	0.00813993
Smp_140020.1	1.1924	5.39525	0.000926482	0.00813993
Smp_162500.1	-0.993703	3.16882	0.000935281	0.00821214
Smp_242240.1	-0.747777	7.89411	0.000936145	0.00821463
Smp_341950.1	0.424261	6.27423	0.000938939	0.00823404
Smp_165200.3	0.327351	6.77041	0.000942553	0.00826061
Smp_065240.1	0.796272	4.85765	0.000944085	0.00826892
SmLINC105641-IBu	-2.01874	0.661283	0.000946916	0.00828586
Smp_069770.1	-0.293778	6.51025	0.00094719	0.00828586
Smp_345570.1	-0.290159	6.87809	0.000948564	0.00829276
Smp_322810.1	-0.669891	5.78744	0.000950077	0.00829761
Smp_031220.1	-0.784979	3.21865	0.000950292	0.00829761
Smp_156910.6	-1.40666	6.67443	0.000951349	0.00830172
Smp_001360.1	-0.289125	7.89721	0.000954823	0.0083269
Smp_174960.2	0.567899	6.85589	0.000957883	0.00834844
Smp_013810.2	0.531581	6.06714	0.000959186	0.00835002
Smp_333770.1	-0.287057	6.96295	0.000959243	0.00835002
SmLINC127585-IBu	1.79975	1.23363	0.000962411	0.00837245
Smp_347300.1	-0.344485	5.8042	0.000965915	0.00839777
Smp_145620.1	0.443759	5.37709	0.000973181	0.00845574
Smp_105910.1	0.295905	7.82265	0.000975517	0.00847084
Smp_151280.1	-0.237884	7.05503	0.000977708	0.00848466
Smp_046740.1	-0.359676	7.46322	0.000980288	0.00850183
Smp_006730.1	0.576073	7.75735	0.000982521	0.00851598
Smp_134360.1	0.363702	6.03526	0.000985618	0.00853133
Smp_245370.1	0.452697	7.51333	0.000986647	0.00853133
Smp_180660.1	-1.15371	3.10458	0.000986703	0.00853133
SmLINC157425-IBu	-1.33899	0.954158	0.000990818	0.00856169
Smp_023360.1	-0.248637	7.72593	0.000996723	0.00859904
Smp_032150.1	0.412853	6.32133	0.000996963	0.00859904
Smp_153950.1	-0.388329	6.22056	0.000999741	0.00861774
Smp_140270.2	0.809829	3.42951	0.00100107	0.00862395
Smp_301420.1	-0.887199	5.45342	0.00100249	0.00863089
Smp_154390.1	-1.4707	1.57424	0.0010062	0.00865757
Smp_333090.1	-0.230259	7.58109	0.00100726	0.00865827
SmLINC133211-IBu	1.10445	3.4239	0.0010075	0.00865827
Smp_127440.2	0.455932	6.46575	0.00100836	0.0086604
Smp_038540.1	0.414649	5.27186	0.00101021	0.00867098
Smp_123020.1	0.734789	5.82242	0.00101273	0.00868484
Smp_055770.1	-0.273112	6.40084	0.00101397	0.00868484
Smp_091640.1	-0.30593	7.10601	0.00101466	0.00868484
Smp_091640.2	-0.30593	7.10601	0.00101466	0.00868484
SmLINC116522-IBu	2.84083	0.0595657	0.00101489	0.00868484
Smp_169960.1	-0.394424	6.19924	0.00101851	0.00871054
Smp_029740.1	-0.414942	4.95496	0.00101991	0.00871726
Smp_083400.1	-0.338509	7.53981	0.00102231	0.00873253
Smp_036670.1	2.44847	-0.186763	0.00102513	0.00875135
Smp_130260.1	-0.601793	7.82973	0.00102576	0.00875144
Smp_016090.1	0.369501	7.26733	0.00102913	0.00877488
SmLNCA117152-IBu	2.64646	-0.914216	0.00103049	0.00878115
Smp_203410.1	-1.19432	2.4712	0.00103762	0.0088366
Smp_136030.1	0.606014	4.14006	0.0010398	0.00884991
Smp_132450.1	0.292413	6.75828	0.00104057	0.00885114
Smp_344540.1	2.43644	2.81585	0.00104199	0.00885782
SmLINC166845-IBu	0.689442	5.29482	0.00104583	0.00888518
Smp_019890.1	-0.82559	4.36597	0.00104725	0.00889192
Smp_074080.1	-0.326328	6.27032	0.0010494	0.00890426
Smp_170800.1	-0.214671	6.98419	0.0010501	0.00890426
Smp_085380.1	0.434991	5.42672	0.00105122	0.00890426
Smp_155030.1	0.360242	5.21984	0.00105122	0.00890426
Smp_071570.1	7.49355	1.92912	0.00105245	0.0089093
Smp_031880.1	-0.344838	9.30462	0.00105547	0.00892458
Smp_145630.1	0.325389	5.31801	0.00105614	0.00892458
Smp_145630.2	0.325389	5.31801	0.00105614	0.00892458
Smp_051410.1	0.60996	4.39673	0.00105748	0.00893054
Smp_171750.1	0.542097	5.53359	0.00106059	0.00895147
Smp_140770.2	-1.17651	2.84916	0.00106168	0.00895534
Smp_040990.1	-0.657194	3.0433	0.00106545	0.00898173
Smp_015710.1	0.349431	5.87944	0.00106694	0.00898895
Smp_306840.1	-1.10029	3.44239	0.00106773	0.0089903
Smp_036500.2	0.448953	6.32593	0.00107412	0.00903873
SmLNCA154183-IBu	3.28384	-0.0551682	0.00107605	0.00904872
Smp_061100.1	-0.780494	4.55406	0.00107659	0.00904872
Smp_079710.1	-0.407752	5.82378	0.00107754	0.00905135
Smp_103560.2	-0.953199	3.12493	0.00107975	0.00906451
SmLNCA129261-IBu	0.467024	5.43177	0.00108446	0.00909867
Smp_069880.1	-0.254376	6.54443	0.00108573	0.00910396
Smp_173340.1	-0.489291	5.86384	0.00108764	0.00911454
Smp_158740.1	0.407041	6.32523	0.00109153	0.0091417
Smp_332800.1	-0.291595	5.75761	0.00109417	0.00915841
Smp_032500.1	-0.537419	4.91788	0.00109845	0.00918877
Smp_032420.1	-0.375156	5.91271	0.0011004	0.00919415
Smp_098740.1	-0.283215	5.96021	0.00110052	0.00919415
Smp_159840.2	-0.768354	3.63493	0.00110104	0.00919415
Smp_010400.1	-0.33187	5.38053	0.00110284	0.00920375
Smp_040770.1	-0.254054	6.6137	0.00110377	0.00920447
Smp_340030.1	0.488438	6.15361	0.00110422	0.00920447
Smp_028100.1	-0.252928	8.22876	0.00110534	0.00920838
Smp_093710.1	0.869523	3.86871	0.00111379	0.00927329
Smp_086470.1	-0.554709	6.39672	0.00111445	0.00927336
Smp_017520.1	-0.784395	2.84692	0.00111582	0.00927914
Smp_340450.1	0.401657	5.62462	0.00111646	0.00927914
Smp_160710.1	0.374076	6.88648	0.00111941	0.00929527
Smp_180200.3	0.872568	4.55903	0.00111971	0.00929527
SmLINC142807-IBu	-1.92308	-0.0744163	0.00112343	0.00931643
SmLINC135986-IBu	-2.39026	1.51969	0.00112358	0.00931643
Smp_127180.1	0.377787	6.03842	0.00112468	0.00932011
Smp_059810.1	-0.360774	5.32277	0.00112697	0.0093336
Smp_345890.2	-1.65637	3.49594	0.00113439	0.00938955
Smp_165710.1	-0.235145	6.50888	0.00113763	0.00941085
Smp_243210.1	-0.826721	2.9739	0.00114097	0.00943304
Smp_001780.3	1.37718	4.82671	0.00114789	0.00948468
Smp_160490.1	-0.757066	4.02546	0.00115224	0.0095151
SmLINC104833-IBu	2.37984	1.04577	0.00115667	0.00954603
Smp_171140.2	0.737804	6.22558	0.00115928	0.00955373
Smp_198680.1	-0.309489	6.28894	0.00115931	0.00955373
Smp_166340.2	0.956772	4.43201	0.00116234	0.0095656
Smp_093790.1	-2.22868	1.23981	0.00116242	0.0095656
Smp_308820.1	-0.517312	7.63596	0.00116403	0.00957332
Smp_309610.2	-0.207875	7.19363	0.00116538	0.00957885
Smp_071560.1	-0.230118	7.29259	0.00116613	0.00957949
Smp_155720.1	0.269385	6.65426	0.00116731	0.00958357
Smp_014280.1	-0.626399	5.48536	0.00117361	0.00962971
Smp_144600.3	1.17665	2.42047	0.00118281	0.00969959
Smp_150960.1	0.320351	5.72021	0.00118531	0.00971418
Smp_050520.1	-0.980434	6.33997	0.00118663	0.00971418
Smp_342670.1	-0.656373	3.16913	0.00118665	0.00971418
Smp_026630.2	-0.272235	6.65234	0.00118951	0.00973199
Smp_320620.1	0.227806	7.68081	0.00119208	0.00974462
Smp_047200.1	-0.212753	9.48175	0.00119243	0.00974462
SmLINC168817-IBu	5.42258	0.39419	0.00119612	0.00976914
Smp_310830.1	-0.235259	8.20507	0.00120257	0.00981359
Smp_173610.1	0.679712	4.73228	0.00120305	0.00981359
Smp_342700.1	0.302524	6.29893	0.00120364	0.00981359
Smp_132200.1	0.647809	5.32704	0.00120552	0.00982324
Smp_001950.1	-0.337318	6.99638	0.00120993	0.00985345
Smp_170550.2	-0.436321	9.56098	0.00121421	0.00987965
SmLNCA168250-IBu	2.37044	0.00745969	0.00121634	0.00987965
Smp_340260.1	0.37917	7.27154	0.00121654	0.00987965
Smp_305030.3	-0.440052	4.79744	0.00121744	0.00987965
Smp_347350.1	0.337929	6.78971	0.00121826	0.00987965
Smp_027920.1	-0.328665	7.24845	0.00121832	0.00987965
Smp_157230.1	-0.43712	5.89102	0.00121838	0.00987965
Smp_034490.1	-0.276693	6.86171	0.00121873	0.00987965
Smp_244920.1	0.709473	5.79937	0.00122006	0.00988479
Smp_037290.1	-0.274515	5.91163	0.00122256	0.0098994
Smp_129770.1	0.32811	7.33539	0.00122369	0.00990286
Smp_008220.1	-0.522904	4.70758	0.00122699	0.00992389
Smp_165550.1	-0.28824	6.67276	0.00122908	0.00992481
Smp_129900.2	-0.54845	5.11166	0.00122931	0.00992481
Smp_079050.1	-0.610034	4.3397	0.00123048	0.00992481
Smp_334710.1	-0.470394	4.52665	0.00123075	0.00992481
Smp_131890.1	-0.453973	8.51029	0.00123173	0.00992481
Smp_012150.1	0.302718	6.79909	0.00123186	0.00992481
Smp_041450.1	-0.211599	7.79671	0.00123201	0.00992481
Smp_302040.3	0.436153	6.61511	0.00123584	0.00994525
Smp_029750.1	-0.217805	6.65248	0.00123595	0.00994525
Smp_016990.1	-0.274883	5.95365	0.00123679	0.00994636
Smp_344710.1	-0.37138	6.31538	0.00123947	0.00996225
Smp_154910.1	-0.369383	5.92076	0.00124191	0.00997443
Smp_041740.1	-0.23102	8.51702	0.00124265	0.00997443
Smp_139010.1	0.296753	5.89972	0.0012431	0.00997443
Smp_154560.1	-1.29507	3.47172	0.00124669	0.00999307
Smp_244310.1	0.407923	4.63679	0.00124684	0.00999307
Smp_033620.1	-0.365447	6.68163	0.00124838	0.00999974
Smp_031590.1	-0.232983	6.52268	0.00124915	0.0100003
Smp_308260.1	1.01422	3.64123	0.00124998	0.0100012
Smp_001780.2	2.0209	2.90469	0.00125095	0.0100033
Smp_337740.1	-1.7474	1.42777	0.0012533	0.0100165
SmLINC176407-IBu	-2.44156	0.978911	0.00125441	0.0100197
Smp_163830.1	-0.27014	5.7611	0.00126328	0.0100773
Smp_335980.1	0.769532	3.20447	0.00126365	0.0100773
Smp_085520.1	-0.213192	7.93543	0.00126376	0.0100773
Smp_320340.1	-0.943535	7.18918	0.00126624	0.0100915
Smp_002820.1	0.543398	6.33368	0.00126773	0.0100976
Smp_155390.1	-0.646205	3.36692	0.00127071	0.0101156
Smp_153290.1	0.352052	6.97455	0.00127165	0.0101162
Smp_333550.2	-0.488108	5.08025	0.00127277	0.0101162
Smp_180200.2	0.329562	7.05266	0.00127292	0.0101162
SmLINC140555-IBu	1.72049	0.452642	0.00127557	0.0101291
SmLINC105635-IBu	-1.55994	0.781328	0.00127598	0.0101291
SmLNCA172750-IBu	-2.31558	-0.593654	0.00127781	0.010138
Smp_309720.1	0.454589	7.41003	0.00128035	0.0101498
Smp_072980.1	-0.420706	8.28521	0.00128074	0.0101498
Smp_140480.1	-0.324104	7.0391	0.00128469	0.0101754
Smp_304870.1	-0.806981	2.77978	0.00128906	0.0102043
Smp_158190.1	0.474861	4.35288	0.00129932	0.0102779
Smp_097660.1	-0.219649	9.07474	0.00129981	0.0102779
Smp_052890.1	-0.299677	6.11782	0.00130701	0.010325
Smp_134670.3	0.346227	7.74431	0.00130722	0.010325
Smp_306270.1	-0.379204	4.74597	0.00131061	0.010346
Smp_122630.1	2.82991	0.940184	0.00131219	0.0103527
Smp_134090.1	-0.410697	4.75064	0.00131414	0.010355
Smp_124860.2	1.25291	3.21306	0.00131439	0.010355
Smp_054010.1	-1.02679	7.00776	0.00131468	0.010355
Smp_173250.1	0.551212	4.5285	0.00131573	0.0103572
Smp_158560.4	0.624916	6.03418	0.00131642	0.0103572
Smp_322230.2	-2.32425	1.40419	0.00131836	0.0103667
Smp_082780.1	1.18324	4.56641	0.00132173	0.0103874
Smp_244860.2	-1.13016	3.23842	0.0013229	0.0103909
Smp_062560.1	-0.726363	4.37043	0.00132592	0.0104076
SmLINC151258-IBu	-2.98567	0.0646146	0.0013265	0.0104076
Smp_080530.1	-0.362247	5.2728	0.00133074	0.0104351
Smp_174870.1	0.864956	5.33748	0.00133229	0.0104372
Smp_034550.1	-0.750399	8.25853	0.00133249	0.0104372
Smp_068060.1	0.279337	7.96789	0.00133405	0.0104384
SmLNCA173765-IBu	-2.00491	-0.260438	0.00133411	0.0104384
Smp_179300.1	-0.323805	8.77464	0.00133703	0.0104511
Smp_044560.1	0.333044	7.00956	0.00133722	0.0104511
Smp_170840.1	1.75707	3.58809	0.00134066	0.0104722
Smp_170020.1	-1.3709	2.03851	0.00134168	0.0104744
Smp_011560.1	-0.403817	8.89465	0.00134339	0.010482
Smp_140000.1	0.593218	6.36985	0.00134455	0.0104852
SmLNCA112855-IBu	-1.97587	0.726802	0.00134626	0.0104928
Smp_052350.2	0.524236	5.66092	0.00134995	0.0105109
SmLINC178293-IBu	-1.78832	1.69933	0.00135007	0.0105109
Smp_303980.1	-0.999753	4.71428	0.00135144	0.0105158
Smp_194800.3	1.74702	4.43222	0.00135385	0.0105273
Smp_336780.1	-0.71345	6.93457	0.00135509	0.0105273
Smp_143070.1	0.372836	6.17133	0.00135514	0.0105273
Smp_143750.1	-0.570218	4.92572	0.00135621	0.0105298
Smp_050250.1	-0.347803	6.02169	0.00135811	0.0105387
Smp_212030.1	-0.756282	3.89688	0.0013592	0.0105414
Smp_336790.1	0.307086	5.91322	0.00135997	0.0105417
SmLINC127114-IBu	-0.390301	7.1345	0.00136079	0.0105422
Smp_147020.2	-0.90888	4.20206	0.00136168	0.0105429
Smp_204730.1	0.299611	6.3519	0.00136291	0.0105429
Smp_316000.1	-0.332954	5.07776	0.00136312	0.0105429
Smp_005160.1	0.993024	5.25497	0.00136419	0.0105455
Smp_089460.1	-0.519946	8.46009	0.00136604	0.0105483
Smp_336290.2	-0.551985	4.45729	0.00136863	0.0105625
Smp_007900.1	-0.229771	8.47058	0.00136981	0.0105658
SmLINC153921-IBu	6.22359	-0.63692	0.00137269	0.0105823
Smp_086220.1	-0.678381	3.72345	0.00137372	0.0105844
Smp_088460.1	0.383121	6.88913	0.0013772	0.0106055
Smp_041830.1	-0.225457	7.41422	0.00137827	0.0106079
Smp_340860.1	-0.574165	6.33118	0.00138013	0.0106165
SmLINC116012-IBu	-6.62008	-0.196568	0.00138448	0.0106442
Smp_006780.1	-0.309448	6.60237	0.0013862	0.0106485
Smp_094930.1	4.61901	3.35268	0.00138697	0.0106485
Smp_063190.1	1.72291	1.30079	0.00138768	0.0106485
Smp_340610.1	-1.31122	2.2854	0.00138805	0.0106485
Smp_027000.2	0.28463	6.04356	0.00139469	0.0106936
Smp_214110.1	-0.251885	6.83879	0.00140944	0.0108009
Smp_337130.3	-0.32233	6.99429	0.00141117	0.0108083
Smp_071000.1	-0.304941	6.75399	0.00141334	0.0108191
Smp_054540.1	-0.194473	8.23219	0.00141429	0.0108205
Smp_334750.1	0.434781	5.93356	0.00141516	0.0108213
Smp_210370.1	-0.329071	8.6811	0.00141655	0.0108245
Smp_106050.1	-0.415006	5.51834	0.00141837	0.0108245
Smp_156350.1	0.300123	6.4515	0.0014185	0.0108245
Smp_140240.1	-0.623799	3.31041	0.00141864	0.0108245
Smp_133470.1	0.323777	5.72631	0.00142715	0.0108835
Smp_044920.2	0.5592	5.59753	0.00143166	0.010912
Smp_094050.3	-0.311201	6.15089	0.00143272	0.0109139
Smp_332700.1	0.337538	6.02432	0.00143344	0.0109139
Smp_071050.1	0.38959	6.00039	0.00143456	0.0109165
Smp_210170.1	0.487865	4.89724	0.00143716	0.0109301
Smp_244680.1	0.307867	6.43384	0.00143788	0.0109301
Smp_013470.1	-0.268629	9.21206	0.00143984	0.0109391
Smp_204010.1	0.70819	4.73595	0.00144094	0.0109416
Smp_025160.2	-0.349231	5.41421	0.00144356	0.0109547
Smp_087220.1	0.410211	5.21687	0.00144422	0.0109547
Smp_051000.1	0.500856	5.64183	0.00144686	0.0109689
SmLINC150976-IBu	-1.91887	0.347777	0.00144837	0.0109744
Smp_133330.1	0.430399	5.42495	0.00145004	0.0109812
Smp_319130.1	-0.437365	4.6882	0.00145257	0.0109945
Smp_308270.1	-0.311397	5.46913	0.0014539	0.0109987
Smp_141980.1	-0.74763	5.69116	0.00145939	0.0110343
Smp_135460.2	0.394656	6.12599	0.0014623	0.0110504
Smp_316270.1	0.427286	7.61913	0.00146778	0.0110859
Smp_332380.1	-0.618144	4.92107	0.0014701	0.0110975
Smp_089670.1	1.56867	9.69593	0.00147354	0.0111176
Smp_171530.1	-0.392024	5.69769	0.00148027	0.0111623
Smp_128440.1	0.344317	5.13043	0.00148573	0.0111976
Smp_145650.1	0.800366	4.42644	0.00148987	0.0112228
Smp_120700.1	-0.401153	9.43777	0.0014915	0.0112291
SmLINC175979-IBu	-1.09759	2.61057	0.00149737	0.0112673
Smp_029060.1	-0.335333	6.70588	0.00149854	0.01127
Smp_052710.1	-0.287696	6.03368	0.00149932	0.01127
Smp_327480.1	0.270747	10.2391	0.00150302	0.0112812
Smp_131810.1	-0.456242	5.86724	0.00150321	0.0112812
Smp_052060.1	-0.30038	7.03914	0.00150576	0.0112884
Smp_167830.1	1.36455	2.87378	0.00150594	0.0112884
SmLINC136522-IBu	7.32775	0.776932	0.00150677	0.0112884
Smp_043030.1	0.314202	9.38673	0.00150735	0.0112884
Smp_006560.1	-0.371402	6.02456	0.00151497	0.0113395
Smp_213440.1	-0.454147	5.40002	0.00151809	0.0113568
Smp_136320.1	-0.270355	6.71513	0.00151998	0.0113649
Smp_007450.1	-0.464863	4.91316	0.00152159	0.0113709
Smp_155970.1	-0.962529	4.17227	0.00152345	0.0113788
Smp_313330.1	-0.720168	3.27367	0.00152447	0.0113805
Smp_053230.1	-0.36097	9.19117	0.00152562	0.0113831
Smp_341060.2	1.45484	1.18429	0.00152682	0.0113851
Smp_156060.1	0.884156	3.91491	0.00152811	0.0113851
Smp_005780.1	-0.434763	6.28998	0.00152831	0.0113851
Smp_146340.1	-0.415231	5.29395	0.00153349	0.011416
Smp_267060.1	-0.212073	6.34495	0.00153406	0.011416
Smp_328500.1	-0.954476	1.9531	0.00154692	0.0115056
Smp_127080.1	0.561697	4.24735	0.00154788	0.0115067
Smp_131380.2	-0.555066	3.63372	0.00155511	0.0115543
Smp_149960.1	0.284436	7.50762	0.00156008	0.0115852
Smp_012810.1	-0.447546	6.43365	0.00156162	0.0115905
Smp_129260.1	-0.39552	7.50303	0.00156397	0.0116019
Smp_077980.4	0.318104	6.38643	0.0015672	0.0116198
Smp_312920.1	-0.306605	7.2779	0.00156951	0.0116308
Smp_137890.1	-1.58197	3.49974	0.00157215	0.0116443
Smp_126540.2	-0.681113	5.65252	0.00157477	0.0116575
Smp_322700.3	0.496062	5.25694	0.00158028	0.0116908
Smp_136160.2	0.603384	4.14153	0.00158091	0.0116908
Smp_169200.1	-1.0387	7.39008	0.00158428	0.0117055
Smp_191870.1	0.286553	8.0147	0.00158456	0.0117055
Smp_054620.1	-1.40712	2.95549	0.00159083	0.0117457
Smp_325510.1	-1.04277	3.01427	0.00159586	0.0117711
Smp_012380.1	-1.02797	4.10586	0.00159601	0.0117711
Smp_144520.1	0.412663	5.7368	0.00159675	0.0117711
SmLNCA108725-IBu	-4.39763	-0.969082	0.00160111	0.011797
SmLINC113133-IBu	2.04403	0.736116	0.00161041	0.0118594
Smp_347220.1	-1.14824	2.20061	0.00162084	0.0119168
Smp_163750.1	0.482756	5.96533	0.00162122	0.0119168
Smp_158050.1	0.238792	7.39203	0.00162139	0.0119168
Smp_014650.1	-0.294756	7.56584	0.00162158	0.0119168
Smp_179890.1	0.368603	4.94574	0.00162258	0.0119168
Smp_129430.1	0.363068	5.97211	0.00162342	0.0119168
SmLINC114872-IBu	1.55726	1.12367	0.00162455	0.0119168
Smp_319810.1	-2.36596	0.682995	0.00162494	0.0119168
Smp_024500.1	-0.272447	6.34281	0.00162687	0.0119188
Smp_128420.1	0.436052	6.14671	0.00162748	0.0119188
Smp_019730.1	-0.26669	8.52828	0.00162775	0.0119188
Smp_066410.2	0.379967	7.08513	0.00162858	0.0119188
Smp_044550.2	-0.421927	8.01417	0.00163067	0.0119279
Smp_165750.1	0.934788	2.92229	0.00164248	0.0120025
SmLINC164678-IBu	0.967147	3.07965	0.00164256	0.0120025
Smp_065770.3	1.80554	1.49211	0.00164427	0.0120088
Smp_203990.1	2.17306	0.213863	0.00164785	0.0120287
Smp_012740.1	-0.386167	6.96589	0.00164965	0.0120356
Smp_009990.2	0.283524	6.68696	0.00165329	0.012056
Smp_345970.2	0.38863	5.58969	0.00165698	0.0120754
Smp_153480.2	-0.339455	8.17016	0.00165766	0.0120754
Smp_128690.2	1.16819	2.32447	0.00165954	0.0120829
Smp_247400.1	-0.664283	3.41359	0.00166404	0.0121054
Smp_062640.1	-0.218051	7.27815	0.00166453	0.0121054
Smp_041700.1	1.31947	2.52901	0.0016652	0.0121054
Smp_172200.1	0.765145	4.98002	0.00166625	0.0121068
Smp_021140.1	-0.284042	8.66962	0.0016679	0.0121126
Smp_022740.1	2.55857	0.14572	0.00166906	0.0121148
Smp_312650.1	-3.27536	-0.47648	0.00167264	0.0121346
Smp_089200.2	-0.711349	6.26336	0.00167491	0.0121448
SmLINC003840-IBu	-0.565101	5.54052	0.00167758	0.0121579
Smp_150220.2	-0.57923	7.87635	0.00167868	0.0121597
Smp_128420.3	1.37803	3.83105	0.00167971	0.0121609
Smp_307880.1	-0.749377	6.02885	0.00168598	0.0121976
Smp_194380.1	0.86287	4.81714	0.00168649	0.0121976
Smp_146360.2	0.927721	3.52949	0.00168887	0.0122085
Smp_347050.1	0.292965	6.48367	0.00169037	0.0122131
Smp_306200.1	-1.49507	4.96554	0.00169187	0.0122177
Smp_008770.1	-0.35636	6.57637	0.001699	0.0122629
Smp_135100.2	-0.324378	5.28281	0.00170028	0.012266
Smp_014170.1	0.462584	9.52696	0.00170199	0.012272
Smp_160170.3	8.48611	0.87433	0.00170314	0.0122741
Smp_330630.2	-1.30942	1.5598	0.00170489	0.0122804
Smp_329590.1	-0.386921	7.01051	0.0017103	0.0123121
Smp_176570.1	-1.12014	2.77871	0.00171103	0.0123121
SmLINC159037-IBu	1.73383	3.57187	0.00171233	0.0123152
SmLINC171806-IBu	2.47488	-0.686892	0.00171508	0.0123278
Smp_125820.2	-0.268202	6.47923	0.00171582	0.0123278
Smp_123630.1	-0.411398	5.77953	0.00172354	0.0123707
SmLINC165219-IBu	1.97039	2.03399	0.00172537	0.0123776
Smp_171720.2	0.324329	6.66457	0.00172837	0.0123928
Smp_144430.2	0.827657	5.72568	0.00173256	0.0124165
Smp_312950.1	-0.258643	7.69849	0.00173676	0.0124403
SmLINC116011-IBu	-1.78433	0.954507	0.00174256	0.0124756
Smp_246170.1	-0.557918	5.86641	0.00174421	0.0124811
Smp_088090.1	0.704245	3.98231	0.00174671	0.0124927
Smp_154520.1	0.616293	4.50974	0.00175403	0.0125387
Smp_139060.2	0.463011	4.89963	0.00175575	0.0125428
Smp_130540.1	-0.464167	6.64349	0.00176523	0.012594
Smp_145320.2	-1.4028	2.28897	0.00176533	0.012594
Smp_017420.1	-1.01615	5.1909	0.00176683	0.0125983
Smp_144170.1	0.908168	4.63735	0.00176836	0.0125985
SmLINC114954-IBu	1.34162	1.53463	0.00176863	0.0125985
Smp_086330.1	-0.494784	9.40984	0.00176968	0.0125996
Smp_076630.1	0.642562	6.32781	0.00177451	0.0126277
Smp_094640.1	0.395714	5.54832	0.00178412	0.0126897
SmLNCA102700-IBu	1.74107	0.918784	0.00178712	0.0127046
Smp_175390.1	-0.706081	5.31548	0.00179453	0.0127509
Smp_143460.1	-0.628829	3.81609	0.00179705	0.0127615
Smp_039810.1	-0.50413	7.72696	0.00179814	0.0127615
Smp_010930.1	-0.204587	7.48977	0.00179898	0.0127615
Smp_302850.3	0.426577	6.43059	0.00179963	0.0127615
Smp_137190.1	-0.28241	5.62536	0.001802	0.0127719
SmLNCA171468-IBu	-2.68694	-0.649951	0.00180683	0.0127998
Smp_067000.3	0.803885	6.75767	0.0018124	0.0128246
Smp_139520.2	0.625813	5.06448	0.00181304	0.0128246
SmLNCA130666-IBu	1.43648	2.63088	0.00181306	0.0128246
Smp_149900.1	-0.231463	8.5305	0.00182033	0.0128635
Smp_128890.1	0.31521	6.48295	0.00182037	0.0128635
Smp_031390.1	2.65398	0.730316	0.00182688	0.0128966
Smp_332170.1	-0.328223	6.29063	0.00182907	0.0129037
Smp_051660.1	-0.220629	6.49065	0.00182971	0.0129037
SmLINC148490-IBu	-3.85556	0.252535	0.00183112	0.0129072
Smp_149420.1	0.271701	6.17696	0.00183352	0.0129144
SmLINC136517-IBu	2.70078	1.37166	0.00183397	0.0129144
Smp_344880.1	-1.06794	2.89302	0.00183737	0.012932
Smp_322890.2	0.56423	4.91716	0.00183964	0.012935
Smp_158610.1	1.10989	6.8119	0.00184238	0.0129479
Smp_244570.1	0.62198	5.79037	0.00184362	0.0129502
Smp_089050.1	-0.483269	5.8775	0.00184536	0.012956
Smp_245320.2	-0.51779	6.14023	0.00185272	0.0130012
Smp_246450.1	-0.275932	6.46216	0.00185443	0.0130022
Smp_046060.1	0.465172	8.81365	0.0018547	0.0130022
[truncated: 1,584 more rows]

## Sheet: Table S5
Table S5. List of genes belonging to each module according to the WGCNA analysis.
brown2	floralwhite	lightsteelblue	darkgreen	blue2	darkviolet	sienna3	plum	plum2	brown4	yellowgreen	firebrick4	cyan	palevioletred3	grey
SmLINC106378-IBu	SmLINC005278-IBu	SmLINC126808-IBu	SmLINC102248-IBu	SmLINC003147-IBu	SmLINC102425-IBu	SmLINC002639-IBu	SmLINC001226-IBu	SmLINC002029-IBu	SmLINC100517-IBu	SmLINC001811-IBu	SmLINC100710-IBu	SmLINC002895-IBu	SmLINC122878-IBu	SmLINC002017-IBu
SmLINC112473-IBu	SmLINC005909-IBu	SmLINC135027-IBu	SmLINC102590-IBu	SmLINC004496-IBu	SmLINC102639-IBu	SmLINC101754-IBu	SmLINC003840-IBu	SmLINC004932-IBu	SmLINC102973-IBu	SmLINC002025-IBu	SmLINC110424-IBu	SmLINC003120-IBu	SmLINC129786-IBu	SmLINC100244-IBu
SmLINC119123-IBu	SmLINC100002122	SmLINC140393-IBu	SmLINC102972-IBu	SmLINC100002121	SmLINC109601-IBu	SmLINC102592-IBu	SmLINC004465-IBu	SmLINC100017-IBu	SmLINC106770-IBu	SmLINC100245-IBu	SmLINC117853-IBu	SmLINC003777-IBu	SmLINC135273-IBu	SmLINC100246-IBu
SmLINC123116-IBu	SmLINC100189-IBu	SmLINC145406-IBu	SmLINC103428-IBu	SmLINC100143-IBu	SmLINC111054-IBu	SmLINC102597-IBu	SmLINC004983-IBu	SmLINC100046-IBu	SmLINC109102-IBu	SmLINC110697-IBu	SmLINC128745-IBu	SmLINC004012-IBu	SmLINC166851-IBu	SmLINC101411-IBu
SmLINC129853-IBu	SmLINC101315-IBu	SmLNCA104310-IBu	SmLINC105544-IBu	SmLINC100180-IBu	SmLINC114512-IBu	SmLINC105610-IBu	SmLINC100030-IBu	SmLINC100062120	SmLINC111051-IBu	SmLINC111062-IBu	SmLINC129507-IBu	SmLINC006435-IBu	SmLINC177241-IBu	SmLINC102377-IBu
SmLINC130684-IBu	SmLINC101519-IBu	Smp_015850.1	SmLINC113131-IBu	SmLINC102735-IBu	SmLINC118710-IBu	SmLINC106555-IBu	SmLINC100451-IBu	SmLINC100107304	SmLINC111052-IBu	SmLINC111538-IBu	SmLINC138640-IBu	SmLINC100000794	SmLNCA142768-IBu	SmLINC102955-IBu
SmLINC131984-IBu	SmLINC101897-IBu	Smp_042150.1	SmLINC114764-IBu	SmLINC106666-IBu	SmLINC131432-IBu	SmLINC107624-IBu	SmLINC100763-IBu	SmLINC100593-IBu	SmLINC111065-IBu	SmLINC111544-IBu	SmLINC143865-IBu	SmLINC100002123	Smp_002600.1	SmLINC110669-IBu
SmLINC133647-IBu	SmLINC102417-IBu	Smp_043500.1	SmLINC114936-IBu	SmLINC107168-IBu	SmLINC136536-IBu	SmLINC108538-IBu	SmLINC101558-IBu	SmLINC100748-IBu	SmLINC114818-IBu	SmLINC118167-IBu	SmLINC158150-IBu	SmLINC100005819	Smp_004420.1	SmLINC115075-IBu
SmLINC136520-IBu	SmLINC102893-IBu	Smp_044520.1	SmLINC118330-IBu	SmLINC107930-IBu	SmLINC137763-IBu	SmLINC109488-IBu	SmLINC102271-IBu	SmLINC100873-IBu	SmLINC115255-IBu	SmLINC119285-IBu	SmLINC161513-IBu	SmLINC100021-IBu	Smp_004420.2	SmLINC119125-IBu
SmLINC141787-IBu	SmLINC103340-IBu	Smp_045070.1	SmLINC118508-IBu	SmLINC108436-IBu	SmLINC147206-IBu	SmLINC110355-IBu	SmLINC104006-IBu	SmLINC100877-IBu	SmLINC117472-IBu	SmLINC121211-IBu	SmLINC174189-IBu	SmLINC100058691	Smp_008610.1	SmLINC121210-IBu
SmLINC144954-IBu	SmLINC103686-IBu	Smp_045410.2	SmLINC123493-IBu	SmLINC108797-IBu	SmLINC148327-IBu	SmLINC111053-IBu	SmLINC105068-IBu	SmLINC101995-IBu	SmLINC117473-IBu	SmLINC121378-IBu	SmLNCA102853-IBu	SmLINC100059-IBu	Smp_011270.1	SmLINC122388-IBu
SmLINC153596-IBu	SmLINC104856-IBu	Smp_045550.1	SmLINC123562-IBu	SmLINC110108-IBu	SmLINC154330-IBu	SmLINC111066-IBu	SmLINC105538-IBu	SmLINC102427-IBu	SmLINC117478-IBu	SmLINC123919-IBu	SmLNCA115922-IBu	SmLINC100059064	Smp_013060.3	SmLINC124976-IBu
SmLINC156549-IBu	SmLINC105115-IBu	Smp_047110.1	SmLINC124765-IBu	SmLINC111059-IBu	SmLINC157011-IBu	SmLINC111067-IBu	SmLINC105635-IBu	SmLINC103737-IBu	SmLINC117485-IBu	SmLINC124949-IBu	SmLNCA139628-IBu	SmLINC100157-IBu	Smp_014570.1	SmLINC133169-IBu
SmLINC156933-IBu	SmLINC105861-IBu	Smp_050700.1	SmLINC125720-IBu	SmLINC111864-IBu	SmLINC161797-IBu	SmLINC111976-IBu	SmLINC105638-IBu	SmLINC103794-IBu	SmLINC117488-IBu	SmLINC128277-IBu	SmLNCA158503-IBu	SmLINC100715-IBu	Smp_019030.1	SmLINC133455-IBu
SmLINC161310-IBu	SmLINC106006-IBu	Smp_059210.1	SmLINC126373-IBu	SmLINC113185-IBu	SmLINC162150-IBu	SmLINC112475-IBu	SmLINC105640-IBu	SmLINC103880-IBu	SmLINC117490-IBu	SmLINC130213-IBu	SmLNCA169643-IBu	SmLINC101496-IBu	Smp_020080.1	SmLINC140517-IBu
SmLINC161512-IBu	SmLINC106486-IBu	Smp_062520.1	SmLINC126640-IBu	SmLINC113615-IBu	SmLINC162649-IBu	SmLINC112559-IBu	SmLINC105641-IBu	SmLINC104004-IBu	SmLINC118110-IBu	SmLINC131022-IBu	SmLNCS138342-IBu	SmLINC101993-IBu	Smp_026700.1	SmLINC141017-IBu
SmLINC161798-IBu	SmLINC106525-IBu	Smp_085240.1	SmLINC127585-IBu	SmLINC115085-IBu	SmLINC162650-IBu	SmLINC115362-IBu	SmLINC105686-IBu	SmLINC105246-IBu	SmLINC121860-IBu	SmLINC135317-IBu	SmLNCS159394-IBu	SmLINC102226-IBu	Smp_028870.1	SmLINC146872-IBu
SmLINC161865-IBu	SmLINC106667-IBu	Smp_091820.1	SmLINC127680-IBu	SmLINC115521-IBu	SmLINC164128-IBu	SmLINC115553-IBu	SmLINC106203-IBu	SmLINC105687-IBu	SmLINC130478-IBu	SmLINC141016-IBu	SmLNCS173616-IBu	SmLINC102413-IBu	Smp_031000.1	SmLINC148486-IBu
SmLINC161895-IBu	SmLINC106773-IBu	Smp_104330.1	SmLINC130485-IBu	SmLINC117422-IBu	SmLINC170019-IBu	SmLINC115582-IBu	SmLINC106419-IBu	SmLINC106774-IBu	SmLINC131547-IBu	SmLINC143112-IBu	Smp_001590.1	SmLINC102428-IBu	Smp_031680.1	SmLINC149462-IBu
SmLINC163310-IBu	SmLINC107928-IBu	Smp_106110.1	SmLINC134332-IBu	SmLINC117722-IBu	SmLINC177430-IBu	SmLINC117008-IBu	SmLINC106485-IBu	SmLINC106953-IBu	SmLINC133905-IBu	SmLINC147178-IBu	Smp_001640.1	SmLINC102432-IBu	Smp_036010.1	SmLINC154043-IBu
SmLINC163938-IBu	SmLINC108616-IBu	Smp_129110.3	SmLINC134838-IBu	SmLINC118314-IBu	SmLNCA102275-IBu	SmLINC117480-IBu	SmLINC106591-IBu	SmLINC107621-IBu	SmLINC135016-IBu	SmLINC147182-IBu	Smp_004170.1	SmLINC102528-IBu	Smp_042440.1	SmLINC156637-IBu
SmLINC166203-IBu	SmLINC108798-IBu	Smp_133050.4	SmLINC138134-IBu	SmLINC119571-IBu	SmLNCA104661-IBu	SmLINC117948-IBu	SmLINC107337-IBu	SmLINC108235-IBu	SmLINC136517-IBu	SmLINC148029-IBu	Smp_004480.2	SmLINC102586-IBu	Smp_042910.1	SmLINC161397-IBu
SmLINC166676-IBu	SmLINC108849-IBu	Smp_133700.3	SmLINC138359-IBu	SmLINC119797-IBu	SmLNCA105430-IBu	SmLINC118239-IBu	SmLINC108388-IBu	SmLINC108603-IBu	SmLINC137465-IBu	SmLINC148484-IBu	Smp_005190.3	SmLINC102587-IBu	Smp_043390.1	SmLINC164711-IBu
SmLINC170210-IBu	SmLINC109783-IBu	Smp_152180.1	SmLINC142755-IBu	SmLINC121219-IBu	SmLNCA112846-IBu	SmLINC118854-IBu	SmLINC108458-IBu	SmLINC108621-IBu	SmLINC140596-IBu	SmLINC150045-IBu	Smp_009760.1	SmLINC102986-IBu	Smp_048430.2	SmLINC164923-IBu
SmLNCA102665-IBu	SmLINC110492-IBu	Smp_164380.1	SmLINC146438-IBu	SmLINC121864-IBu	SmLNCA114030-IBu	SmLINC119824-IBu	SmLINC108799-IBu	SmLINC108839-IBu	SmLINC142920-IBu	SmLINC154918-IBu	Smp_009990.3	SmLINC102987-IBu	Smp_051930.1	SmLINC166545-IBu
SmLNCA103437-IBu	SmLINC113035-IBu	Smp_165580.1	SmLINC146521-IBu	SmLINC121950-IBu	SmLNCA125985-IBu	SmLINC119845-IBu	SmLINC108823-IBu	SmLINC108921-IBu	SmLINC144324-IBu	SmLINC157961-IBu	Smp_010400.1	SmLINC102988-IBu	Smp_059340.2	SmLINC168838-IBu
SmLNCA115873-IBu	SmLINC113133-IBu	Smp_166610.4	SmLINC148988-IBu	SmLINC122517-IBu	SmLNCA154028-IBu	SmLINC121341-IBu	SmLINC109778-IBu	SmLINC109292-IBu	SmLINC144366-IBu	SmLINC159732-IBu	Smp_013840.1	SmLINC102989-IBu	Smp_075800.1	SmLINC169784-IBu
SmLNCA116943-IBu	SmLINC113614-IBu	Smp_167810.2	SmLINC148989-IBu	SmLINC122935-IBu	SmLNCA155550-IBu	SmLINC122887-IBu	SmLINC109855-IBu	SmLINC109684-IBu	SmLINC147203-IBu	SmLINC161183-IBu	Smp_016130.1	SmLINC103334-IBu	Smp_081260.1	SmLINC175565-IBu
SmLNCA126292-IBu	SmLINC114954-IBu	Smp_169010.2	SmLINC149926-IBu	SmLINC122955-IBu	SmLNCA165058-IBu	SmLINC122936-IBu	SmLINC109949-IBu	SmLINC109806-IBu	SmLINC149433-IBu	SmLINC167907-IBu	Smp_016670.1	SmLINC103337-IBu	Smp_085010.1	SmLNCA107747-IBu
SmLNCA127777-IBu	SmLINC115074-IBu	Smp_169460.2	SmLINC150892-IBu	SmLINC123124-IBu	SmLNCA169295-IBu	SmLINC122937-IBu	SmLINC110055-IBu	SmLINC110226-IBu	SmLINC150457-IBu	SmLINC170660-IBu	Smp_019730.1	SmLINC103702-IBu	Smp_085010.2	SmLNCA118406-IBu
SmLNCA139841-IBu	SmLINC115520-IBu	Smp_170200.1	SmLINC150978-IBu	SmLINC123950-IBu	SmLNCA176148-IBu	SmLINC123561-IBu	SmLINC110231-IBu	SmLINC110600-IBu	SmLINC151825-IBu	SmLINC174369-IBu	Smp_019880.1	SmLINC103738-IBu	Smp_102400.1	SmLNCA121511-IBu
SmLNCA142429-IBu	SmLINC115669-IBu	Smp_175910.1	SmLINC152882-IBu	SmLINC125489-IBu	SmLNCS106599-IBu	SmLINC124764-IBu	SmLINC110539-IBu	SmLINC110666-IBu	SmLINC152192-IBu	SmLINC176033-IBu	Smp_021910.2	SmLINC104901-IBu	Smp_103610.1	SmLNCA122551-IBu
SmLNCA147142-IBu	SmLINC117538-IBu	Smp_176930.1	SmLINC154271-IBu	SmLINC126449-IBu	SmLNCS113537-IBu	SmLINC125031-IBu	SmLINC110668-IBu	SmLINC110713-IBu	SmLINC153867-IBu	SmLINC178627-IBu	Smp_024520.1	SmLINC105370-IBu	Smp_104270.1	SmLNCA130253-IBu
SmLNCA154000-IBu	SmLINC117869-IBu	Smp_245530.1	SmLINC156349-IBu	SmLINC127114-IBu	SmLNCS145466-IBu	SmLINC126394-IBu	SmLINC111068-IBu	SmLINC111543-IBu	SmLINC154140-IBu	SmLNCA106199-IBu	Smp_026320.1	SmLINC106400-IBu	Smp_105420.1	SmLNCA132871-IBu
SmLNCA155678-IBu	SmLINC118147-IBu	Smp_246890.1	SmLINC156438-IBu	SmLINC127956-IBu	SmLNCS151771-IBu	SmLINC128276-IBu	SmLINC111108-IBu	SmLINC112109-IBu	SmLINC154346-IBu	SmLNCA112602-IBu	Smp_030780.3	SmLINC106413-IBu	Smp_121930.1	SmLNCA137975-IBu
SmLNCA175820-IBu	SmLINC118149-IBu	Smp_300560.1	SmLINC156886-IBu	SmLINC127975-IBu	SmLNCS177337-IBu	SmLINC130559-IBu	SmLINC112105-IBu	SmLINC112143-IBu	SmLINC155106-IBu	SmLNCA113574-IBu	Smp_033330.1	SmLINC106425-IBu	Smp_127240.1	SmLNCA138802-IBu
SmLNCA177609-IBu	SmLINC118187-IBu	Smp_300990.1	SmLINC156904-IBu	SmLINC128155-IBu	Smp_000150.1	SmLINC132001-IBu	SmLINC112705-IBu	SmLINC112181-IBu	SmLINC155133-IBu	SmLNCA119659-IBu	Smp_033400.2	SmLINC106621-IBu	Smp_127990.1	SmLNCA139491-IBu
Smp_000620.1	SmLINC118507-IBu	Smp_320450.1	SmLINC157461-IBu	SmLINC128232-IBu	Smp_000720.1	SmLINC133127-IBu	SmLINC112783-IBu	SmLINC112474-IBu	SmLINC156636-IBu	SmLNCA154032-IBu	Smp_034420.1	SmLINC106766-IBu	Smp_128940.1	SmLNCA142775-IBu
Smp_001000.1	SmLINC118927-IBu	Smp_323650.1	SmLINC157645-IBu	SmLINC130072-IBu	Smp_001170.1	SmLINC133257-IBu	SmLINC113905-IBu	SmLINC112560-IBu	SmLINC157503-IBu	SmLNCA155359-IBu	Smp_049910.1	SmLINC107117-IBu	Smp_132250.1	SmLNCA146809-IBu
Smp_003620.1	SmLINC118928-IBu	Smp_324240.1	SmLINC159150-IBu	SmLINC130308-IBu	Smp_001950.1	SmLINC133452-IBu	SmLINC114307-IBu	SmLINC112584-IBu	SmLINC158377-IBu	SmLNCA166779-IBu	Smp_050350.1	SmLINC107119-IBu	Smp_137720.1	SmLNCA149414-IBu
Smp_003620.2	SmLINC119713-IBu	Smp_332690.1	SmLINC163039-IBu	SmLINC130846-IBu	Smp_002820.1	SmLINC133453-IBu	SmLINC114751-IBu	SmLINC112613-IBu	SmLINC158780-IBu	SmLNCA175081-IBu	Smp_053550.1	SmLINC107192-IBu	Smp_139240.1	SmLNCA155362-IBu
Smp_004470.1	SmLINC119846-IBu	Smp_335800.1	SmLINC164679-IBu	SmLINC131049-IBu	Smp_003630.1	SmLINC137467-IBu	SmLINC114752-IBu	SmLINC113034-IBu	SmLINC161800-IBu	SmLNCS130945-IBu	Smp_056620.2	SmLINC107795-IBu	Smp_142490.1	SmLNCA155367-IBu
Smp_004550.1	SmLINC120412-IBu	Smp_337140.7	SmLINC164692-IBu	SmLINC131336-IBu	Smp_006860.3	SmLINC138638-IBu	SmLINC114872-IBu	SmLINC114022-IBu	SmLINC162082-IBu	SmLNCS135223-IBu	Smp_056780.1	SmLINC108438-IBu	Smp_143830.2	SmLNCA175286-IBu
Smp_005160.3	SmLINC121828-IBu	Smp_340520.2	SmLINC164913-IBu	SmLINC131549-IBu	Smp_006930.2	SmLINC140018-IBu	SmLINC115519-IBu	SmLINC114092-IBu	SmLINC163642-IBu	SmLNCS138349-IBu	Smp_064280.1	SmLINC108776-IBu	Smp_145510.2	SmLNCS108028-IBu
Smp_006680.1	SmLINC123030-IBu	Smp_341110.1	SmLINC166814-IBu	SmLINC131551-IBu	Smp_007180.1	SmLINC140309-IBu	SmLINC117481-IBu	SmLINC115596-IBu	SmLINC164346-IBu	Smp_003930.1	Smp_065580.1	SmLINC109487-IBu	Smp_147240.6	SmLNCS117627-IBu
Smp_006760.2	SmLINC123951-IBu	Smp_344780.1	SmLINC167138-IBu	SmLINC131562-IBu	Smp_009400.1	SmLINC140359-IBu	SmLINC117484-IBu	SmLINC116011-IBu	SmLINC165029-IBu	Smp_004350.1	Smp_066590.1	SmLINC109495-IBu	Smp_147890.2	SmLNCS119780-IBu
Smp_008070.1	SmLINC124061-IBu	Smp_345010.1	SmLINC167845-IBu	SmLINC131974-IBu	Smp_012010.1	SmLINC140551-IBu	SmLINC117610-IBu	SmLINC116019-IBu	SmLINC167873-IBu	Smp_005210.1	Smp_066590.2	SmLINC109599-IBu	Smp_154740.4	SmLNCS129640-IBu
Smp_008310.1	SmLINC124468-IBu	Smp_347770.1	SmLINC167863-IBu	SmLINC133256-IBu	Smp_012900.1	SmLINC143592-IBu	SmLINC117695-IBu	SmLINC116659-IBu	SmLINC168505-IBu	Smp_006830.1	Smp_066620.1	SmLINC110084-IBu	Smp_160830.1	Smp_010620.2
Smp_008440.1	SmLINC125126-IBu		SmLINC170164-IBu	SmLINC133258-IBu	Smp_013790.1	SmLINC144944-IBu	SmLINC117718-IBu	SmLINC116903-IBu	SmLINC168827-IBu	Smp_010450.1	Smp_067250.2	SmLINC110109-IBu	Smp_161220.1	Smp_013060.2
Smp_008660.2	SmLINC126337-IBu		SmLINC170539-IBu	SmLINC133343-IBu	Smp_014400.1	SmLINC146214-IBu	SmLINC117871-IBu	SmLINC116907-IBu	SmLINC168928-IBu	Smp_011570.1	Smp_068950.2	SmLINC110526-IBu	Smp_162770.2	Smp_014840.2
Smp_008770.1	SmLINC127028-IBu		SmLINC173583-IBu	SmLINC134135-IBu	Smp_014660.1	SmLINC147956-IBu	SmLINC117979-IBu	SmLINC117003-IBu	SmLINC171819-IBu	Smp_011830.2	Smp_070030.1	SmLINC110636-IBu	Smp_166170.1	Smp_017710.1
Smp_009650.1	SmLINC127587-IBu		SmLINC178293-IBu	SmLINC134842-IBu	Smp_014800.1	SmLINC148584-IBu	SmLINC118331-IBu	SmLINC117489-IBu	SmLINC174853-IBu	Smp_011960.3	Smp_070100.1	SmLINC110637-IBu	Smp_166530.1	Smp_018400.3
Smp_010710.1	SmLINC127679-IBu		SmLNCA100003251	SmLINC135065-IBu	Smp_015220.2	SmLINC148620-IBu	SmLINC118400-IBu	SmLINC117692-IBu	SmLNCA100003250	Smp_012030.1	Smp_072800.1	SmLINC110717-IBu	Smp_172590.1	Smp_020270.2
Smp_010820.1	SmLINC127930-IBu		SmLNCA100057923	SmLINC135287-IBu	Smp_015840.1	SmLINC150965-IBu	SmLINC119228-IBu	SmLINC118205-IBu	SmLNCA106135-IBu	Smp_012400.1	Smp_073540.1	SmLINC110842-IBu	Smp_174700.1	Smp_020300.4
Smp_011000.1	SmLINC128262-IBu		SmLNCA101686-IBu	SmLINC135318-IBu	Smp_016050.1	SmLINC150966-IBu	SmLINC119396-IBu	SmLINC118347-IBu	SmLNCA108719-IBu	Smp_013040.1	Smp_076230.1	SmLINC111057-IBu	Smp_181070.1	Smp_028930.1
Smp_012530.1	SmLINC128317-IBu		SmLNCA106570-IBu	SmLINC136143-IBu	Smp_016730.1	SmLINC151033-IBu	SmLINC119915-IBu	SmLINC118858-IBu	SmLNCA112034-IBu	Smp_013070.1	Smp_077280.1	SmLINC111073-IBu	Smp_187140.1	Smp_030760.3
Smp_012920.1	SmLINC128318-IBu		SmLNCA107130-IBu	SmLINC136791-IBu	Smp_019130.1	SmLINC151475-IBu	SmLINC120456-IBu	SmLINC119286-IBu	SmLNCA113215-IBu	Smp_013300.1	Smp_082710.1	SmLINC111546-IBu	Smp_194840.1	Smp_030760.4
Smp_014050.1	SmLINC128606-IBu		SmLNCA111136-IBu	SmLINC137107-IBu	Smp_021100.1	SmLINC152410-IBu	SmLINC122013-IBu	SmLINC120019-IBu	SmLNCA126374-IBu	Smp_013300.2	Smp_089570.1	SmLINC112177-IBu	Smp_194910.1	Smp_031190.3
Smp_014290.2	SmLINC129285-IBu		SmLNCA111708-IBu	SmLINC137505-IBu	Smp_021340.1	SmLINC152576-IBu	SmLINC122520-IBu	SmLINC121216-IBu	SmLNCA126497-IBu	Smp_013610.1	Smp_091480.1	SmLINC112940-IBu	Smp_200450.1	Smp_035460.1
Smp_015730.1	SmLINC129509-IBu		SmLNCA113762-IBu	SmLINC137596-IBu	Smp_021540.2	SmLINC153238-IBu	SmLINC122706-IBu	SmLINC121218-IBu	SmLNCA134866-IBu	Smp_014010.1	Smp_092380.1	SmLINC115254-IBu	Smp_211280.1	Smp_036390.2
Smp_017830.1	SmLINC130975-IBu		SmLNCA114611-IBu	SmLINC138106-IBu	Smp_021750.1	SmLINC153880-IBu	SmLINC122883-IBu	SmLINC121232-IBu	SmLNCA135569-IBu	Smp_014680.1	Smp_092810.1	SmLINC115282-IBu	Smp_244890.3	Smp_050890.1
Smp_018020.1	SmLINC131144-IBu		SmLNCA119836-IBu	SmLINC138235-IBu	Smp_022020.1	SmLINC154041-IBu	SmLINC122899-IBu	SmLINC121380-IBu	SmLNCA143184-IBu	Smp_014780.1	Smp_093750.1	SmLINC115518-IBu	Smp_305870.2	Smp_063390.4
Smp_018160.1	SmLINC131337-IBu		SmLNCA123477-IBu	SmLINC138639-IBu	Smp_022110.1	SmLINC154351-IBu	SmLINC122981-IBu	SmLINC122038-IBu	SmLNCA144190-IBu	Smp_016200.1	Smp_096790.2	SmLINC115888-IBu	Smp_313840.1	Smp_073680.1
Smp_019340.1	SmLINC133371-IBu		SmLNCA129597-IBu	SmLINC138641-IBu	Smp_022470.4	SmLINC158161-IBu	SmLINC123204-IBu	SmLINC122942-IBu	SmLNCA144623-IBu	Smp_020760.2	Smp_123480.1	SmLINC116116-IBu	Smp_317220.1	Smp_077540.2
Smp_023360.1	SmLINC133670-IBu		SmLNCA129827-IBu	SmLINC138692-IBu	Smp_024870.1	SmLINC158170-IBu	SmLINC123945-IBu	SmLINC122945-IBu	SmLNCA148279-IBu	Smp_021790.1	Smp_123640.1	SmLINC116626-IBu	Smp_320530.1	Smp_079370.3
Smp_024180.1	SmLINC134492-IBu		SmLNCA131833-IBu	SmLINC140552-IBu	Smp_025160.2	SmLINC158853-IBu	SmLINC126800-IBu	SmLINC122946-IBu	SmLNCA148572-IBu	Smp_024880.1	Smp_124110.1	SmLINC117421-IBu	Smp_321140.2	Smp_079910.1
Smp_024360.1	SmLINC135394-IBu		SmLNCA136305-IBu	SmLINC140599-IBu	Smp_027300.1	SmLINC158985-IBu	SmLINC127727-IBu	SmLINC122956-IBu	SmLNCA152040-IBu	Smp_025340.1	Smp_124160.1	SmLINC117483-IBu	Smp_324250.1	Smp_120350.2
Smp_025150.1	SmLINC135500-IBu		SmLNCA138025-IBu	SmLINC140775-IBu	Smp_027550.1	SmLINC159101-IBu	SmLINC128226-IBu	SmLINC122982-IBu	SmLNCA153742-IBu	Smp_026420.1	Smp_125800.1	SmLINC117716-IBu	Smp_333570.1	Smp_122960.3
Smp_027480.1	SmLINC136533-IBu		SmLNCA143157-IBu	SmLINC142444-IBu	Smp_028070.1	SmLINC159218-IBu	SmLINC128491-IBu	SmLINC123818-IBu	SmLNCA172967-IBu	Smp_026770.1	Smp_125800.2	SmLINC117759-IBu	Smp_342600.1	Smp_126490.2
Smp_027610.1	SmLINC136552-IBu		SmLNCA146271-IBu	SmLINC142792-IBu	Smp_028490.1	SmLINC159261-IBu	SmLINC129077-IBu	SmLINC123918-IBu	SmLNCS130204-IBu	Smp_026770.2	Smp_129450.1	SmLINC117900-IBu	Smp_343260.1	Smp_126910.1
Smp_028030.1	SmLINC137296-IBu		SmLNCA147309-IBu	SmLINC143111-IBu	Smp_029970.1	SmLINC159477-IBu	SmLINC129079-IBu	SmLINC124761-IBu	SmLNCS152333-IBu	Smp_027990.1	Smp_130940.1	SmLINC117958-IBu	Smp_343920.1	Smp_130270.2
Smp_028140.1	SmLINC137412-IBu		SmLNCA149788-IBu	SmLINC143792-IBu	Smp_031010.2	SmLINC159539-IBu	SmLINC130058-IBu	SmLINC125094-IBu	Smp_000990.1	Smp_028030.2	Smp_131700.1	SmLINC117978-IBu	Smp_344440.1	Smp_131070.2
Smp_029500.1	SmLINC137413-IBu		SmLNCA150078-IBu	SmLINC144904-IBu	Smp_032320.1	SmLINC159549-IBu	SmLINC130396-IBu	SmLINC125983-IBu	Smp_001095.1	Smp_028330.1	Smp_131870.2	SmLINC118286-IBu	Smp_345180.1	Smp_134500.2
Smp_030000.1	SmLINC137452-IBu		SmLNCA161633-IBu	SmLINC144955-IBu	Smp_032480.1	SmLINC160004-IBu	SmLINC130962-IBu	SmLINC125986-IBu	Smp_001095.2	Smp_029100.1	Smp_134880.1	SmLINC118691-IBu	Smp_345910.1	Smp_135270.3
Smp_030260.1	SmLINC137600-IBu		SmLNCA161710-IBu	SmLINC144986-IBu	Smp_032770.3	SmLINC161896-IBu	SmLINC130964-IBu	SmLINC126782-IBu	Smp_001530.1	Smp_031300.2	Smp_135240.3	SmLINC118857-IBu	Smp_347040.4	Smp_137280.2
Smp_030370.1	SmLINC138220-IBu		SmLNCA161899-IBu	SmLINC146522-IBu	Smp_033110.1	SmLINC163351-IBu	SmLINC130966-IBu	SmLINC128157-IBu	Smp_001960.2	Smp_032310.1	Smp_136530.1	SmLINC118988-IBu	Smp_347240.2	Smp_138300.2
Smp_031770.2	SmLINC140555-IBu		SmLNCA163819-IBu	SmLINC146898-IBu	Smp_033620.1	SmLINC164047-IBu	SmLINC130967-IBu	SmLINC129535-IBu	Smp_002160.1	Smp_033710.1	Smp_136760.1	SmLINC119080-IBu		Smp_140040.2
Smp_032060.1	SmLINC143189-IBu		SmLNCA164949-IBu	SmLINC146918-IBu	Smp_033950.1	SmLINC165220-IBu	SmLINC130972-IBu	SmLINC130969-IBu	Smp_002230.1	Smp_034120.1	Smp_136780.1	SmLINC119492-IBu		Smp_142010.2
Smp_032180.1	SmLINC144431-IBu		SmLNCA167166-IBu	SmLINC147487-IBu	Smp_034410.1	SmLINC165289-IBu	SmLINC131335-IBu	SmLINC131042-IBu	Smp_002840.1	Smp_035020.2	Smp_136780.2	SmLINC119798-IBu		Smp_142270.4
Smp_033010.1	SmLINC144945-IBu		SmLNCS119177-IBu	SmLINC148750-IBu	Smp_034660.1	SmLINC165998-IBu	SmLINC132002-IBu	SmLINC131045-IBu	Smp_002840.2	Smp_035080.1	Smp_138230.1	SmLINC119844-IBu		Smp_142700.1
Smp_034190.1	SmLINC146194-IBu		SmLNCS140869-IBu	SmLINC149925-IBu	Smp_034660.2	SmLINC166051-IBu	SmLINC132022-IBu	SmLINC131504-IBu	Smp_005720.1	Smp_040080.2	Smp_138770.1	SmLINC120017-IBu		Smp_145610.2
Smp_035370.2	SmLINC146493-IBu		SmLNCS146187-IBu	SmLINC149980-IBu	Smp_036630.1	SmLINC166546-IBu	SmLINC133165-IBu	SmLINC132261-IBu	Smp_006190.1	Smp_040610.3	Smp_139470.1	SmLINC120018-IBu		Smp_147370.1
Smp_038870.1	SmLINC147542-IBu		SmLNCS170806-IBu	SmLINC153160-IBu	Smp_036950.1	SmLINC166552-IBu	SmLINC133211-IBu	SmLINC132785-IBu	Smp_006630.1	Smp_041480.2	Smp_140120.2	SmLINC120143-IBu		Smp_156240.2
Smp_040770.1	SmLINC147585-IBu		SmLNCS171668-IBu	SmLINC153242-IBu	Smp_037290.1	SmLINC166689-IBu	SmLINC133767-IBu	SmLINC133170-IBu	Smp_006710.1	Smp_041830.1	Smp_141360.2	SmLINC120149-IBu		Smp_157940.1
Smp_040990.1	SmLINC147754-IBu		Smp_000240.1	SmLINC154210-IBu	Smp_040800.3	SmLINC167670-IBu	SmLINC133906-IBu	SmLINC133649-IBu	Smp_007300.1	Smp_043100.1	Smp_142930.1	SmLINC120666-IBu		Smp_165150.3
Smp_041430.1	SmLINC147863-IBu		Smp_000950.1	SmLINC154873-IBu	Smp_041750.1	SmLINC167898-IBu	SmLINC133935-IBu	SmLINC133771-IBu	Smp_008290.1	Smp_044160.1	Smp_143730.1	SmLINC121274-IBu		Smp_165350.2
Smp_041450.1	SmLINC148111-IBu		Smp_001410.1	SmLINC156934-IBu	Smp_042270.1	SmLINC168823-IBu	SmLINC134338-IBu	SmLINC134038-IBu	Smp_010230.1	Smp_044400.1	Smp_143780.1	SmLINC121675-IBu		Smp_165350.4
Smp_041980.1	SmLINC148161-IBu		Smp_001780.2	SmLINC157363-IBu	Smp_042270.2	SmLINC168825-IBu	SmLINC134945-IBu	SmLINC134722-IBu	Smp_012480.2	Smp_046880.2	Smp_145420.1	SmLINC122519-IBu		Smp_165790.2
Smp_042680.1	SmLINC148936-IBu		Smp_002280.1	SmLINC157364-IBu	Smp_042980.1	SmLINC168922-IBu	SmLINC135126-IBu	SmLINC135030-IBu	Smp_012480.4	Smp_048160.1	Smp_147630.1	SmLINC122713-IBu		Smp_166420.1
Smp_043150.1	SmLINC149998-IBu		Smp_003670.1	SmLINC159014-IBu	Smp_043260.1	SmLINC171424-IBu	SmLINC135171-IBu	SmLINC135033-IBu	Smp_012580.1	Smp_048970.1	Smp_152500.2	SmLINC122851-IBu		Smp_169800.3
Smp_043270.1	SmLINC150454-IBu		Smp_005160.1	SmLINC159479-IBu	Smp_044810.1	SmLINC171806-IBu	SmLINC135395-IBu	SmLINC135035-IBu	Smp_013870.1	Smp_049510.1	Smp_154330.1	SmLINC122884-IBu		Smp_169800.4
Smp_043990.1	SmLINC152102-IBu		Smp_005160.6	SmLINC160193-IBu	Smp_046060.1	SmLINC177598-IBu	SmLINC136129-IBu	SmLINC135797-IBu	Smp_014840.1	Smp_049730.2	Smp_156290.1	SmLINC122885-IBu		Smp_170440.3
Smp_045200.2	SmLINC153158-IBu		Smp_005330.3	SmLINC160620-IBu	Smp_046130.3	SmLNCA100227487	SmLINC136992-IBu	SmLINC136125-IBu	Smp_015020.1	Smp_049730.3	Smp_158320.3	SmLINC122939-IBu		Smp_181440.2
Smp_046030.1	SmLINC153353-IBu		Smp_005780.1	SmLINC161371-IBu	Smp_049390.3	SmLNCA102534-IBu	SmLINC137034-IBu	SmLINC136128-IBu	Smp_015800.1	Smp_053140.1	Smp_160820.1	SmLINC122986-IBu		Smp_197070.1
Smp_046630.1	SmLINC154348-IBu		Smp_006760.1	SmLINC161394-IBu	Smp_049630.1	SmLNCA106020-IBu	SmLINC137036-IBu	SmLINC136248-IBu	Smp_018610.1	Smp_053780.1	Smp_162620.4	SmLINC122987-IBu		Smp_212410.1
Smp_047370.1	SmLINC154374-IBu		Smp_007330.1	SmLINC161402-IBu	Smp_050920.1	SmLNCA107595-IBu	SmLINC137315-IBu	SmLINC136537-IBu	Smp_019040.1	Smp_054330.1	Smp_162910.1	SmLINC123121-IBu		Smp_213490.2
Smp_049600.1	SmLINC155104-IBu		Smp_008580.1	SmLINC161740-IBu	Smp_052140.1	SmLNCA107777-IBu	SmLINC137509-IBu	SmLINC136794-IBu	Smp_019630.1	Smp_055220.4	Smp_163050.3	SmLINC123122-IBu		Smp_241460.1
Smp_053230.1	SmLINC155651-IBu		Smp_010690.1	SmLINC161866-IBu	Smp_052710.1	SmLNCA108484-IBu	SmLINC137595-IBu	SmLINC137176-IBu	Smp_020040.1	Smp_055770.2	Smp_163110.1	SmLINC123495-IBu		Smp_246800.2
Smp_054200.1	SmLINC156935-IBu		Smp_011980.1	SmLINC162281-IBu	Smp_052800.1	SmLNCA109994-IBu	SmLINC137795-IBu	SmLINC137333-IBu	Smp_020070.1	Smp_055870.1	Smp_166290.1	SmLINC123497-IBu		Smp_302950.2
Smp_054300.1	SmLINC157460-IBu		Smp_012540.1	SmLINC162282-IBu	Smp_053390.1	SmLNCA112033-IBu	SmLINC138058-IBu	SmLINC137381-IBu	Smp_020200.1	Smp_056360.1	Smp_166790.3	SmLINC123498-IBu		Smp_316770.1
Smp_056200.1	SmLINC157548-IBu		Smp_013520.1	SmLINC162360-IBu	Smp_053510.1	SmLNCA113393-IBu	SmLINC138231-IBu	SmLINC137659-IBu	Smp_021170.1	Smp_058780.1	Smp_167650.1	SmLINC123563-IBu		Smp_319340.1
Smp_056440.1	SmLINC158129-IBu		Smp_016340.1	SmLINC162802-IBu	Smp_053800.1	SmLNCA115048-IBu	SmLINC138288-IBu	SmLINC137881-IBu	Smp_021300.1	Smp_060010.1	Smp_168370.1	SmLINC123565-IBu		Smp_321020.1
Smp_058150.1	SmLINC158969-IBu		Smp_018250.2	SmLINC164910-IBu	Smp_054730.1	SmLNCA115324-IBu	SmLINC139694-IBu	SmLINC137979-IBu	Smp_021600.3	Smp_060420.3	Smp_169290.1	SmLINC123947-IBu		Smp_321690.1
Smp_058380.1	SmLINC159030-IBu		Smp_018500.1	SmLINC164922-IBu	Smp_054790.1	SmLNCA115484-IBu	SmLINC139695-IBu	SmLINC138227-IBu	Smp_024030.1	Smp_061560.1	Smp_169690.1	SmLINC124284-IBu		Smp_326740.1
Smp_058450.1	SmLINC159037-IBu		Smp_019790.2	SmLINC165357-IBu	Smp_055340.1	SmLNCA118687-IBu	SmLINC139696-IBu	SmLINC138233-IBu	Smp_024360.2	Smp_062250.1	Smp_169950.1	SmLINC125015-IBu		Smp_328390.1
Smp_059930.1	SmLINC160005-IBu		Smp_020550.1	SmLINC165706-IBu	Smp_055720.2	SmLNCA121790-IBu	SmLINC139701-IBu	SmLINC140311-IBu	Smp_024900.1	Smp_062530.3	Smp_169980.1	SmLINC125388-IBu		Smp_331810.2
Smp_060820.1	SmLINC161399-IBu		Smp_021960.2	SmLINC166718-IBu	Smp_058620.1	SmLNCA123535-IBu	SmLINC140522-IBu	SmLINC140313-IBu	Smp_025670.2	Smp_064360.1	Smp_173060.5	SmLINC125406-IBu		Smp_335590.1
Smp_061940.1	SmLINC161592-IBu		Smp_024240.2	SmLINC166846-IBu	Smp_059880.1	SmLNCA125860-IBu	SmLINC141430-IBu	SmLINC140519-IBu	Smp_028170.1	Smp_065770.1	Smp_175410.1	SmLINC125719-IBu		Smp_337140.6
Smp_063330.1	SmLINC161862-IBu		Smp_025380.1	SmLINC167887-IBu	Smp_059910.1	SmLNCA127774-IBu	SmLINC141491-IBu	SmLINC141015-IBu	Smp_028200.2	Smp_067250.1	Smp_176420.4	SmLINC126018-IBu		Smp_337870.1
Smp_064330.1	SmLINC163597-IBu		Smp_026270.1	SmLINC167964-IBu	Smp_060490.1	SmLNCA129414-IBu	SmLINC143163-IBu	SmLINC141917-IBu	Smp_028730.1	Smp_068340.1	Smp_191210.2	SmLINC126320-IBu		Smp_340500.1
Smp_065370.3	SmLINC164678-IBu		Smp_026560.1	SmLINC173019-IBu	Smp_060860.1	SmLNCA133331-IBu	SmLINC143363-IBu	SmLINC142003-IBu	Smp_029360.3	Smp_068440.1	Smp_200300.1	SmLINC126642-IBu		Smp_342400.1
Smp_066830.1	SmLINC164808-IBu		Smp_027000.1	SmLINC173808-IBu	Smp_060900.1	SmLNCA136575-IBu	SmLINC144289-IBu	SmLINC142005-IBu	Smp_030930.2	Smp_071470.2	Smp_210740.1	SmLINC126643-IBu		Smp_344630.1
Smp_067000.1	SmLINC165217-IBu		Smp_027910.2	SmLINC174450-IBu	Smp_061590.2	SmLNCA144929-IBu	SmLINC144956-IBu	SmLINC143590-IBu	Smp_031180.1	Smp_071770.1	Smp_210830.1	SmLINC126771-IBu		Smp_345370.1
Smp_067480.1	SmLINC165219-IBu		Smp_028130.1	SmLINC174491-IBu	Smp_062510.1	SmLNCA148568-IBu	SmLINC145436-IBu	SmLINC143608-IBu	Smp_031570.2	Smp_072890.2	Smp_210960.1	SmLINC126807-IBu		Smp_345510.3
Smp_068270.1	SmLINC166001-IBu		Smp_029040.2	SmLINC174625-IBu	Smp_062530.2	SmLNCA149088-IBu	SmLINC145437-IBu	SmLINC143821-IBu	Smp_031690.1	Smp_073070.1	Smp_211050.1	SmLINC126809-IBu		Smp_345890.1
Smp_070020.1	SmLINC166758-IBu		Smp_030150.1	SmLINC174737-IBu	Smp_063040.1	SmLNCA152308-IBu	SmLINC145974-IBu	SmLINC144320-IBu	Smp_032150.1	Smp_073200.2	Smp_213140.1	SmLINC126815-IBu
Smp_074150.1	SmLINC166845-IBu		Smp_030400.2	SmLINC174958-IBu	Smp_063110.1	SmLNCA155369-IBu	SmLINC146025-IBu	SmLINC144713-IBu	Smp_032820.1	Smp_074930.1	Smp_214130.1	SmLINC126963-IBu
Smp_074880.1	SmLINC167268-IBu		Smp_031070.2	SmLINC175044-IBu	Smp_063250.1	SmLNCA156282-IBu	SmLINC146215-IBu	SmLINC144903-IBu	Smp_033210.2	Smp_075140.1	Smp_214200.1	SmLINC127030-IBu
Smp_075380.1	SmLINC167846-IBu		Smp_031920.1	SmLINC176111-IBu	Smp_064050.1	SmLNCA156407-IBu	SmLINC146519-IBu	SmLINC145829-IBu	Smp_035280.1	Smp_076150.2	Smp_244460.1	SmLINC127281-IBu
Smp_077390.1	SmLINC168643-IBu		Smp_032250.1	SmLINC176299-IBu	Smp_068120.1	SmLNCA157380-IBu	SmLINC146956-IBu	SmLINC146459-IBu	Smp_035360.1	Smp_077670.1	Smp_245330.1	SmLINC127426-IBu
Smp_080420.1	SmLINC168831-IBu		Smp_033020.2	SmLINC177449-IBu	Smp_069120.1	SmLNCA161848-IBu	SmLINC147109-IBu	SmLINC146916-IBu	Smp_035360.2	Smp_078090.1	Smp_245780.1	SmLINC127467-IBu
Smp_085780.1	SmLINC169097-IBu		Smp_033050.3	SmLINC177738-IBu	Smp_070640.1	SmLNCA161905-IBu	SmLINC147179-IBu	SmLINC147177-IBu	Smp_035540.1	Smp_078280.1	Smp_246110.1	SmLINC127586-IBu
Smp_086480.1	SmLINC170537-IBu		Smp_033210.1	SmLINC178563-IBu	Smp_072340.1	SmLNCA162532-IBu	SmLINC147184-IBu	SmLINC147196-IBu	Smp_036270.1	Smp_078600.1	Smp_267240.1	SmLINC127898-IBu
Smp_087550.1	SmLINC170549-IBu		Smp_034450.1	SmLINC178693-IBu	Smp_072870.1	SmLNCA162833-IBu	SmLINC147287-IBu	SmLINC147755-IBu	Smp_037120.1	Smp_078600.2	Smp_267280.1	SmLINC128076-IBu
Smp_089200.2	SmLINC171800-IBu		Smp_035190.2	SmLINC178748-IBu	Smp_073510.1	SmLNCA167793-IBu	SmLINC147292-IBu	SmLINC148112-IBu	Smp_037780.1	Smp_079700.1	Smp_300440.1	SmLINC128127-IBu
Smp_089640.1	SmLINC172979-IBu		Smp_036180.4	SmLNCA100636-IBu	Smp_076150.1	SmLNCA170291-IBu	SmLINC148606-IBu	SmLINC149313-IBu	Smp_039160.1	Smp_079960.1	Smp_303550.1	SmLINC128156-IBu
Smp_090150.1	SmLINC173022-IBu		Smp_036500.2	SmLNCA101379-IBu	Smp_076390.2	SmLNCA170292-IBu	SmLINC148757-IBu	SmLINC149842-IBu	Smp_039640.2	Smp_080840.1	Smp_306910.1	SmLINC128229-IBu
Smp_095360.1	SmLINC177329-IBu		Smp_037590.1	SmLNCA102281-IBu	Smp_077000.1	SmLNCA170440-IBu	SmLINC148951-IBu	SmLINC149979-IBu	Smp_041100.1	Smp_080980.1	Smp_307330.1	SmLINC128233-IBu
Smp_095520.1	SmLINC177429-IBu		Smp_037590.2	SmLNCA104245-IBu	Smp_078240.1	SmLNCA172517-IBu	SmLINC149291-IBu	SmLINC150458-IBu	Smp_041480.3	Smp_081460.1	Smp_309710.2	SmLINC128617-IBu
Smp_099420.1	SmLINC177629-IBu		Smp_038420.1	SmLNCA104312-IBu	Smp_081250.1	SmLNCA177347-IBu	SmLINC149511-IBu	SmLINC150478-IBu	Smp_041770.3	Smp_082560.1	Smp_316580.1	SmLINC128637-IBu
Smp_100380.1	SmLNCA101906-IBu		Smp_038540.1	SmLNCA104317-IBu	Smp_082280.1	SmLNCA177348-IBu	SmLINC149999-IBu	SmLINC150481-IBu	Smp_043200.1	Smp_082860.1	Smp_318110.1	SmLINC128642-IBu
Smp_102510.1	SmLNCA102700-IBu		Smp_038820.1	SmLNCA105676-IBu	Smp_082660.1	SmLNCS101119-IBu	SmLINC150295-IBu	SmLINC150659-IBu	Smp_043200.2	Smp_084140.2	Smp_319080.1	SmLINC128878-IBu
Smp_103560.1	SmLNCA102809-IBu		Smp_039810.1	SmLNCA108802-IBu	Smp_084910.1	SmLNCS106682-IBu	SmLINC150452-IBu	SmLINC150893-IBu	Smp_043360.2	Smp_085650.1	Smp_322240.1	SmLINC129238-IBu
Smp_106060.1	SmLNCA106877-IBu		Smp_040110.2	SmLNCA109170-IBu	Smp_085380.1	SmLNCS132258-IBu	SmLINC150456-IBu	SmLINC150976-IBu	Smp_043580.1	Smp_087440.2	Smp_324070.1	SmLINC129241-IBu
Smp_121460.1	SmLNCA107746-IBu		Smp_041760.1	SmLNCA109374-IBu	Smp_086270.1	SmLNCS145500-IBu	SmLINC150933-IBu	SmLINC151168-IBu	Smp_043670.1	Smp_088420.2	Smp_324260.1	SmLINC129498-IBu
Smp_121990.3	SmLNCA108391-IBu		Smp_041770.1	SmLNCA111734-IBu	Smp_088240.1	SmLNCS159119-IBu	SmLINC150961-IBu	SmLINC151301-IBu	Smp_044440.1	Smp_088940.1	Smp_327260.1	SmLINC129512-IBu
Smp_122780.1	SmLNCA109741-IBu		Smp_042030.3	SmLNCA112604-IBu	Smp_088550.3	SmLNCS159121-IBu	SmLINC150964-IBu	SmLINC151407-IBu	Smp_044470.4	Smp_089400.1	Smp_328080.1	SmLINC129730-IBu
Smp_123020.2	SmLNCA110780-IBu		Smp_042630.2	SmLNCA115482-IBu	Smp_089650.2	SmLNCS160133-IBu	SmLINC151299-IBu	SmLINC151974-IBu	Smp_045600.1	Smp_091230.1	Smp_333940.1	SmLINC129894-IBu
Smp_124230.1	SmLNCA112007-IBu		Smp_044920.2	SmLNCA116247-IBu	Smp_093110.1	SmLNCS172576-IBu	SmLINC151576-IBu	SmLINC152179-IBu	Smp_047410.1	Smp_091460.1	Smp_336250.1	SmLINC130054-IBu
Smp_125450.1	SmLNCA113448-IBu		Smp_045400.1	SmLNCA117535-IBu	Smp_093800.1	SmLNCS172921-IBu	SmLINC151855-IBu	SmLINC152255-IBu	Smp_047860.1	Smp_095150.1	Smp_337570.1	SmLINC130061-IBu
Smp_125520.3	SmLNCA114096-IBu		Smp_045510.1	SmLNCA117803-IBu	Smp_094470.1	SmLNCS178808-IBu	SmLINC151935-IBu	SmLINC152442-IBu	Smp_048420.1	Smp_095290.1	Smp_337760.1	SmLINC130340-IBu
Smp_126070.1	SmLNCA114700-IBu		Smp_045680.1	SmLNCA117805-IBu	Smp_096240.1	Smp_000100.3	SmLINC151976-IBu	SmLINC153157-IBu	Smp_049520.3	Smp_095410.1	Smp_341440.1	SmLINC130390-IBu
Smp_127200.1	SmLNCA121599-IBu		Smp_046020.1	SmLNCA119954-IBu	Smp_096760.2	Smp_000110.1	SmLINC151977-IBu	SmLINC153706-IBu	Smp_050220.1	Smp_097380.1	Smp_342400.2	SmLINC130960-IBu
Smp_127450.1	SmLNCA122860-IBu		Smp_048080.2	SmLNCA120144-IBu	Smp_098760.2	Smp_000230.1	SmLINC152379-IBu	SmLINC153913-IBu	Smp_053060.1	Smp_097490.1	Smp_346050.1	SmLINC130971-IBu
Smp_128000.1	SmLNCA123010-IBu		Smp_048620.1	SmLNCA120769-IBu	Smp_103740.1	Smp_000300.2	SmLINC152575-IBu	SmLINC154607-IBu	Smp_053470.1	Smp_098760.1	Smp_346380.2	SmLINC131021-IBu
Smp_128150.1	SmLNCA125437-IBu		Smp_050470.2	SmLNCA121262-IBu	Smp_104520.1	Smp_000640.1	SmLINC153240-IBu	SmLINC156118-IBu	Smp_054450.2	Smp_099210.1	Smp_346940.1	SmLINC131341-IBu
Smp_128230.1	SmLNCA126004-IBu		Smp_051220.1	SmLNCA122009-IBu	Smp_104680.1	Smp_000830.1	SmLINC153883-IBu	SmLINC156635-IBu	Smp_057210.1	Smp_100110.1	Smp_347590.1	SmLINC131402-IBu
Smp_128630.1	SmLNCA128567-IBu		Smp_051410.1	SmLNCA124409-IBu	Smp_105690.1	Smp_001030.1	SmLINC154042-IBu	SmLINC158131-IBu	Smp_058360.1	Smp_102490.1	Smp_347700.2	SmLINC131999-IBu
Smp_129610.1	SmLNCA132189-IBu		Smp_054810.1	SmLNCA126159-IBu	Smp_105910.1	Smp_001090.1	SmLINC154094-IBu	SmLINC158167-IBu	Smp_059170.1	Smp_103280.1		SmLINC132166-IBu
Smp_132730.1	SmLNCA133132-IBu		Smp_055740.1	SmLNCA127721-IBu	Smp_111980.1	Smp_001500.1	SmLINC157320-IBu	SmLINC158444-IBu	Smp_059170.2	Smp_104580.2		SmLINC132176-IBu
Smp_132830.1	SmLNCA136556-IBu		Smp_055770.1	SmLNCA129795-IBu	Smp_120380.3	Smp_002870.1	SmLINC157422-IBu	SmLINC159221-IBu	Smp_062300.1	Smp_104860.1		SmLINC132423-IBu
Smp_133600.1	SmLNCA136747-IBu		Smp_057120.2	SmLNCA129797-IBu	Smp_120640.1	Smp_003250.1	SmLINC157424-IBu	SmLINC159291-IBu	Smp_064250.1	Smp_105540.1		SmLINC133174-IBu
Smp_134510.1	SmLNCA137696-IBu		Smp_057320.1	SmLNCA131500-IBu	Smp_122340.1	Smp_003340.1	SmLINC157425-IBu	SmLINC159472-IBu	Smp_064640.1	Smp_105860.1		SmLINC133454-IBu
Smp_135460.2	SmLNCA141828-IBu		Smp_058080.1	SmLNCA131832-IBu	Smp_122370.1	Smp_003440.1	SmLINC157545-IBu	SmLINC159826-IBu	Smp_065770.3	Smp_107200.2		SmLINC133456-IBu
Smp_136660.1	SmLNCA141912-IBu		Smp_058400.1	SmLNCA134284-IBu	Smp_122930.1	Smp_003600.1	SmLINC157799-IBu	SmLINC160003-IBu	Smp_066630.1	Smp_115290.1		SmLINC133654-IBu
Smp_137050.1	SmLNCA142771-IBu		Smp_059870.1	SmLNCA135425-IBu	Smp_122940.1	Smp_003710.1	SmLINC158153-IBu	SmLINC161126-IBu	Smp_066820.1	Smp_115340.1		SmLINC133669-IBu
Smp_137940.1	SmLNCA143200-IBu		Smp_060900.2	SmLNCA136398-IBu	Smp_124050.1	Smp_003940.1	SmLINC158162-IBu	SmLINC161396-IBu	Smp_066960.2	Smp_122170.1		SmLINC134331-IBu
Smp_138590.5	SmLNCA143211-IBu		Smp_061250.1	SmLNCA136553-IBu	Smp_124050.3	Smp_003980.1	SmLINC159004-IBu	SmLINC161400-IBu	Smp_067580.1	Smp_122630.1		SmLINC134499-IBu
Smp_139970.2	SmLNCA147304-IBu		Smp_061510.1	SmLNCA141727-IBu	Smp_124100.2	Smp_004070.1	SmLINC159021-IBu	SmLINC161406-IBu	Smp_068000.1	Smp_123040.1		SmLINC135017-IBu
Smp_141010.2	SmLNCA147305-IBu		Smp_061920.1	SmLNCA142426-IBu	Smp_124660.1	Smp_004440.1	SmLINC159129-IBu	SmLINC161799-IBu	Smp_069220.1	Smp_124130.1		SmLINC135029-IBu
Smp_143070.2	SmLNCA151503-IBu		Smp_062680.1	SmLNCA142778-IBu	Smp_125050.1	Smp_004640.1	SmLINC159173-IBu	SmLINC162994-IBu	Smp_069770.2	Smp_125280.1		SmLINC135032-IBu
Smp_144010.1	SmLNCA153951-IBu		Smp_062980.1	SmLNCA144407-IBu	Smp_125340.1	Smp_005080.2	SmLINC159220-IBu	SmLINC163613-IBu	Smp_070190.1	Smp_125300.3		SmLINC135563-IBu
Smp_144220.1	SmLNCA154981-IBu		Smp_063390.3	SmLNCA144408-IBu	Smp_125460.1	Smp_005160.5	SmLINC159224-IBu	SmLINC163644-IBu	Smp_071550.3	Smp_125770.1		SmLINC137108-IBu
Smp_145410.3	SmLNCA155343-IBu		Smp_063670.2	SmLNCA144688-IBu	Smp_126850.1	Smp_005500.1	SmLINC159289-IBu	SmLINC164082-IBu	Smp_071880.1	Smp_126690.1		SmLINC137257-IBu
Smp_145630.1	SmLNCA155357-IBu		Smp_064500.2	SmLNCA145136-IBu	Smp_127010.1	Smp_005670.1	SmLINC159318-IBu	SmLINC164118-IBu	Smp_072350.1	Smp_126990.1		SmLINC137314-IBu
Smp_145630.2	SmLNCA156280-IBu		Smp_065240.1	SmLNCA146384-IBu	Smp_127180.1	Smp_006680.2	SmLINC159388-IBu	SmLINC164122-IBu	Smp_072440.1	Smp_127430.2		SmLINC137371-IBu
Smp_147970.1	SmLNCA156283-IBu		Smp_066950.1	SmLNCA149067-IBu	Smp_127380.2	Smp_006700.2	SmLINC159473-IBu	SmLINC164127-IBu	Smp_072460.1	Smp_127490.1		SmLINC137451-IBu
Smp_148800.1	SmLNCA156347-IBu		Smp_066950.2	SmLNCA149164-IBu	Smp_127520.3	Smp_006720.1	SmLINC159607-IBu	SmLINC164267-IBu	Smp_074410.1	Smp_127810.2		SmLINC137704-IBu
Smp_149320.1	SmLNCA158981-IBu		Smp_067090.1	SmLNCA149991-IBu	Smp_128120.2	Smp_007180.2	SmLINC159884-IBu	SmLINC164440-IBu	Smp_075420.1	Smp_127940.1		SmLINC137916-IBu
Smp_149420.1	SmLNCA161189-IBu		Smp_067400.1	SmLNCA152673-IBu	Smp_128220.1	Smp_007510.3	SmLINC161393-IBu	SmLINC165395-IBu	Smp_076450.2	Smp_127990.2		SmLINC138105-IBu
Smp_149960.1	SmLNCA163804-IBu		Smp_068250.2	SmLNCA153823-IBu	Smp_128420.1	Smp_007650.1	SmLINC162527-IBu	SmLINC165767-IBu	Smp_076530.1	Smp_128050.1		SmLINC138107-IBu
Smp_150300.3	SmLNCA164797-IBu		Smp_068920.1	SmLNCA154047-IBu	Smp_128680.1	Smp_008120.1	SmLINC162827-IBu	SmLINC165996-IBu	Smp_077540.1	Smp_128070.1		SmLINC138108-IBu
Smp_150640.1	SmLNCA165585-IBu		Smp_068950.1	SmLNCA154259-IBu	Smp_128790.1	Smp_008260.1	SmLINC164111-IBu	SmLINC166002-IBu	Smp_078270.1	Smp_128510.1		SmLINC138211-IBu
Smp_150980.1	SmLNCA166556-IBu		Smp_069720.1	SmLNCA154602-IBu	Smp_128890.1	Smp_008450.1	SmLINC164112-IBu	SmLINC166003-IBu	Smp_079400.1	Smp_128690.4		SmLINC138230-IBu
Smp_151100.1	SmLNCA166575-IBu		Smp_071150.1	SmLNCA155358-IBu	Smp_128960.4	Smp_008490.1	SmLINC164114-IBu	SmLINC166052-IBu	Smp_079420.2	Smp_128770.1		SmLINC138508-IBu
Smp_152280.1	SmLNCA168214-IBu		Smp_071630.1	SmLNCA155388-IBu	Smp_128990.1	Smp_008500.1	SmLINC164125-IBu	SmLINC166399-IBu	Smp_079860.1	Smp_128920.1		SmLINC138509-IBu
Smp_152710.1	SmLNCA168250-IBu		Smp_072190.1	SmLNCA156346-IBu	Smp_129100.1	Smp_008660.1	SmLINC164266-IBu	SmLINC166542-IBu	Smp_080210.1	Smp_130180.1		SmLINC138517-IBu
Smp_152940.2	SmLNCA169141-IBu		Smp_072470.1	SmLNCA156404-IBu	Smp_129320.1	Smp_009030.1	SmLINC165823-IBu	SmLINC166543-IBu	Smp_080530.2	Smp_132300.1		SmLINC138525-IBu
Smp_153960.1	SmLNCA169291-IBu		Smp_073290.1	SmLNCA157820-IBu	Smp_129560.1	Smp_009340.1	SmLINC166225-IBu	SmLINC167470-IBu	Smp_081140.2	Smp_133020.2		SmLINC138635-IBu
Smp_155320.1	SmLNCA170290-IBu		Smp_073610.1	SmLNCA158704-IBu	Smp_129720.1	Smp_010140.2	SmLINC166251-IBu	SmLINC167668-IBu	Smp_083040.2	Smp_133940.1		SmLINC138675-IBu
Smp_156410.1	SmLNCA170716-IBu		Smp_073680.2	SmLNCA161177-IBu	Smp_130470.1	Smp_010290.1	SmLINC166570-IBu	SmLINC167765-IBu	Smp_083040.3	Smp_134230.1		SmLINC138727-IBu
Smp_157670.1	SmLNCA171233-IBu		Smp_074500.1	SmLNCA161712-IBu	Smp_130610.1	Smp_011010.1	SmLINC166777-IBu	SmLINC167836-IBu	Smp_084400.1	Smp_135790.5		SmLINC140011-IBu
Smp_158110.1	SmLNCA173144-IBu		Smp_075040.1	SmLNCA163376-IBu	Smp_131650.1	Smp_011220.1	SmLINC167344-IBu	SmLINC167844-IBu	Smp_085290.1	Smp_135920.1		SmLINC140028-IBu
Smp_161080.2	SmLNCA173145-IBu		Smp_075400.1	SmLNCA164087-IBu	Smp_131810.1	Smp_011230.3	SmLINC167831-IBu	SmLINC167865-IBu	Smp_085480.1	Smp_136010.1		SmLINC140265-IBu
Smp_161370.1	SmLNCA173529-IBu		Smp_078560.1	SmLNCA165054-IBu	Smp_131840.1	Smp_011710.1	SmLINC167833-IBu	SmLINC167867-IBu	Smp_086190.1	Smp_136040.1		SmLINC140532-IBu
Smp_161530.2	SmLNCA174172-IBu		Smp_078560.2	SmLNCA165056-IBu	Smp_132020.1	Smp_012350.3	SmLINC167837-IBu	SmLINC168265-IBu	Smp_087010.1	Smp_136310.1		SmLINC140697-IBu
Smp_161580.1	SmLNCA174623-IBu		Smp_079240.1	SmLNCA165841-IBu	Smp_132170.3	Smp_012780.1	SmLINC168820-IBu	SmLINC168442-IBu	Smp_087220.1	Smp_136700.1		SmLINC141788-IBu
Smp_162340.1	SmLNCA177357-IBu		Smp_080110.1	SmLNCA166510-IBu	Smp_134020.1	Smp_012810.1	SmLINC169558-IBu	SmLINC169433-IBu	Smp_087340.1	Smp_137950.1		SmLINC141796-IBu
Smp_163220.1	SmLNCS102305-IBu		Smp_080320.1	SmLNCA166882-IBu	Smp_134140.1	Smp_013840.2	SmLINC169590-IBu	SmLINC169559-IBu	Smp_087930.3	Smp_139100.5		SmLINC142499-IBu
Smp_163420.3	SmLNCS108449-IBu		Smp_082360.1	SmLNCA169098-IBu	Smp_134820.1	Smp_014080.1	SmLINC171798-IBu	SmLINC171796-IBu	Smp_090450.2	Smp_139530.1		SmLINC143105-IBu
Smp_163610.1	SmLNCS113782-IBu		Smp_082620.1	SmLNCA169738-IBu	Smp_136300.1	Smp_014670.2	SmLINC172313-IBu	SmLINC172253-IBu	Smp_090890.1	Smp_139840.1		SmLINC143493-IBu
Smp_165470.3	SmLNCS138341-IBu		Smp_083400.1	SmLNCA171144-IBu	Smp_136360.2	Smp_014730.1	SmLINC174175-IBu	SmLINC172271-IBu	Smp_091470.1	Smp_140040.1		SmLINC143783-IBu
Smp_166320.1	SmLNCS140201-IBu		Smp_084610.1	SmLNCA171944-IBu	Smp_137110.2	Smp_014840.3	SmLINC176010-IBu	SmLINC172672-IBu	Smp_092170.1	Smp_140420.1		SmLINC143822-IBu
Smp_166790.1	SmLNCS143325-IBu		Smp_089000.1	SmLNCA172010-IBu	Smp_137310.1	Smp_014850.1	SmLINC177081-IBu	SmLINC172840-IBu	Smp_093210.1	Smp_141220.2		SmLINC143832-IBu
Smp_167810.1	SmLNCS145206-IBu		Smp_089880.1	SmLNCA173031-IBu	Smp_137740.4	Smp_015220.1	SmLINC177448-IBu	SmLINC173021-IBu	Smp_093580.1	Smp_141480.1		SmLINC143978-IBu
Smp_167890.1	SmLNCS156910-IBu		Smp_090070.1	SmLNCA174173-IBu	Smp_137970.1	Smp_015440.1	SmLINC177466-IBu	SmLINC173174-IBu	Smp_093780.2	Smp_142090.1		SmLINC144318-IBu
Smp_169050.2	SmLNCS157154-IBu		Smp_092320.3	SmLNCA176316-IBu	Smp_138220.1	Smp_015480.1	SmLINC177628-IBu	SmLINC173681-IBu	Smp_094020.1	Smp_142250.1		SmLINC144430-IBu
Smp_169660.1	SmLNCS161916-IBu		Smp_093100.2	SmLNCA176695-IBu	Smp_138310.2	Smp_015480.2	SmLINC178542-IBu	SmLINC173882-IBu	Smp_094640.1	Smp_142320.1		SmLINC144460-IBu
Smp_170980.1	SmLNCS163689-IBu		Smp_093740.1	SmLNCS100088-IBu	Smp_138890.1	Smp_016090.1	SmLINC178546-IBu	SmLINC174176-IBu	Smp_094760.1	Smp_142970.1		SmLINC144464-IBu
Smp_171080.1	SmLNCS163731-IBu		Smp_094880.1	SmLNCS106153-IBu	Smp_138920.1	Smp_016180.1	SmLINC178736-IBu	SmLINC174178-IBu	Smp_096210.1	Smp_144310.2		SmLINC144943-IBu
Smp_172490.1	Smp_000050.2		Smp_096010.2	SmLNCS109287-IBu	Smp_140100.1	Smp_016510.1	SmLINC178785-IBu	SmLINC174179-IBu	Smp_096410.1	Smp_144370.1		SmLINC145785-IBu
Smp_174260.1	Smp_000190.1		Smp_096320.1	SmLNCS117286-IBu	Smp_140390.1	Smp_016550.1	SmLINC178787-IBu	SmLINC174185-IBu	Smp_096910.1	Smp_144720.1		SmLINC145868-IBu
Smp_176110.1	Smp_000320.1		Smp_097320.1	SmLNCS125833-IBu	Smp_140760.1	Smp_016550.2	SmLNCA102897-IBu	SmLINC174454-IBu	Smp_097370.1	Smp_146830.2		SmLINC145984-IBu
Smp_180800.1	Smp_000480.2		Smp_097590.1	SmLNCS128014-IBu	Smp_141540.1	Smp_016600.1	SmLNCA104053-IBu	SmLINC174624-IBu	Smp_099440.1	Smp_147370.2		SmLINC146024-IBu
Smp_181130.1	Smp_000870.1		Smp_098320.2	SmLNCS129135-IBu	Smp_141580.1	Smp_016640.2	SmLNCA105142-IBu	SmLINC176297-IBu	Smp_100070.1	Smp_147950.3		SmLINC146167-IBu
Smp_194040.1	Smp_001780.3		Smp_098320.3	SmLNCS129639-IBu	Smp_144070.1	Smp_016920.1	SmLNCA105386-IBu	SmLINC176415-IBu	Smp_103990.1	Smp_148970.1		SmLINC146169-IBu
Smp_197540.1	Smp_002100.1		Smp_098850.1	SmLNCS131083-IBu	Smp_144180.2	Smp_017890.1	SmLNCA106377-IBu	SmLINC177014-IBu	Smp_113630.1	Smp_149410.1		SmLINC146862-IBu
Smp_198560.1	Smp_002510.1		Smp_098890.1	SmLNCS131797-IBu	Smp_144490.2	Smp_017990.1	SmLNCA107436-IBu	SmLINC177431-IBu	Smp_120320.1	Smp_150070.1		SmLINC146868-IBu
Smp_200240.1	Smp_002880.1		Smp_099890.1	SmLNCS132340-IBu	Smp_144520.1	Smp_018010.1	SmLNCA107544-IBu	SmLINC177761-IBu	Smp_121320.3	Smp_150160.1		SmLINC146921-IBu
Smp_201030.1	Smp_002920.1		Smp_104210.1	SmLNCS137305-IBu	Smp_145670.1	Smp_018220.1	SmLNCA107705-IBu	SmLINC178545-IBu	Smp_121780.1	Smp_150660.1		SmLINC147106-IBu
Smp_203410.1	Smp_003610.1		Smp_104670.1	SmLNCS137629-IBu	Smp_146110.1	Smp_018570.1	SmLNCA107743-IBu	SmLINC178550-IBu	Smp_122490.1	Smp_151050.1		SmLINC147195-IBu
Smp_204740.1	Smp_004600.1		Smp_104790.1	SmLNCS138347-IBu	Smp_146280.1	Smp_018790.1	SmLNCA107748-IBu	SmLINC178647-IBu	Smp_122730.1	Smp_151580.1		SmLINC147198-IBu
Smp_204770.1	Smp_004680.1		Smp_114160.1	SmLNCS138348-IBu	Smp_146630.1	Smp_019190.1	SmLNCA108453-IBu	SmLINC178694-IBu	Smp_122820.1	Smp_151720.1		SmLINC147488-IBu
Smp_205760.1	Smp_005010.1		Smp_118750.1	SmLNCS143326-IBu	Smp_146730.1	Smp_019890.2	SmLNCA108483-IBu	SmLINC178696-IBu	Smp_122920.1	Smp_152380.1		SmLINC147543-IBu
Smp_208010.1	Smp_005160.4		Smp_119110.1	SmLNCS143687-IBu	Smp_147240.1	Smp_019950.1	SmLNCA108485-IBu	SmLINC178728-IBu	Smp_122940.2	Smp_152390.1		SmLINC147545-IBu
Smp_209050.1	Smp_005290.1		Smp_121140.2	SmLNCS144775-IBu	Smp_147360.1	Smp_020090.1	SmLNCA108803-IBu	SmLINC178745-IBu	Smp_123030.1	Smp_152650.1		SmLINC147586-IBu
Smp_212190.2	Smp_005520.1		Smp_121140.3	SmLNCS146930-IBu	Smp_147620.1	Smp_020400.3	SmLNCA110436-IBu	SmLINC178755-IBu	Smp_123130.1	Smp_152800.1		SmLINC147674-IBu
Smp_212860.1	Smp_007450.2		Smp_121420.1	SmLNCS154774-IBu	Smp_147920.1	Smp_020540.1	SmLNCA110437-IBu	SmLINC178784-IBu	Smp_123180.1	Smp_152800.2		SmLINC147737-IBu
Smp_212940.1	Smp_007550.1		Smp_121950.1	SmLNCS167885-IBu	Smp_148480.1	Smp_021130.1	SmLNCA111349-IBu	SmLINC178786-IBu	Smp_123210.1	Smp_153300.1		SmLINC147947-IBu
Smp_213350.1	Smp_007710.1		Smp_123390.1	SmLNCS172339-IBu	Smp_148540.1	Smp_021130.2	SmLNCA111352-IBu	SmLINC178788-IBu	Smp_123260.1	Smp_153480.1		SmLINC148038-IBu
Smp_242800.1	Smp_008360.1		Smp_125080.1	SmLNCS176346-IBu	Smp_148940.2	Smp_021160.1	SmLNCA111592-IBu	SmLINC178789-IBu	Smp_123440.1	Smp_154420.1		SmLINC148140-IBu
Smp_244030.1	Smp_008470.1		Smp_125210.1	Smp_000030.1	Smp_149710.1	Smp_021590.2	SmLNCA112082-IBu	SmLNCA100251-IBu	Smp_123520.1	Smp_154640.1		SmLINC148609-IBu
Smp_244240.1	Smp_009420.1		Smp_125480.1	Smp_000590.1	Smp_150020.1	Smp_021830.2	SmLNCA112854-IBu	SmLNCA100795-IBu	Smp_123590.1	Smp_155420.2		SmLINC148611-IBu
Smp_244340.2	Smp_010280.1		Smp_126690.2	Smp_000600.1	Smp_150280.1	Smp_022130.1	SmLNCA113443-IBu	SmLNCA101278-IBu	Smp_124120.1	Smp_155450.2		SmLINC148661-IBu
Smp_244960.1	Smp_010370.1		Smp_126770.1	Smp_000630.1	Smp_150560.1	Smp_022140.1	SmLNCA114342-IBu	SmLNCA101279-IBu	Smp_124290.1	Smp_155530.1		SmLINC148675-IBu
Smp_245940.1	Smp_011150.1		Smp_126800.4	Smp_000660.1	Smp_150990.1	Smp_022340.1	SmLNCA114492-IBu	SmLNCA101430-IBu	Smp_124700.1	Smp_156470.1		SmLINC148957-IBu
Smp_246240.1	Smp_011560.1		Smp_127280.5	Smp_000755.1	Smp_151750.1	Smp_022470.1	SmLNCA115007-IBu	SmLNCA101826-IBu	Smp_125890.2	Smp_157240.1		SmLINC149467-IBu
Smp_247160.2	Smp_011660.1		Smp_127440.3	Smp_000810.1	Smp_152570.1	Smp_022500.1	SmLNCA115579-IBu	SmLNCA101829-IBu	Smp_127080.1	Smp_157830.1		SmLINC149691-IBu
Smp_247230.1	Smp_012410.1		Smp_127930.1	Smp_001040.1	Smp_152990.1	Smp_022850.1	SmLNCA115924-IBu	SmLNCA102274-IBu	Smp_127650.1	Smp_158190.1		SmLINC149847-IBu
Smp_247740.1	Smp_012440.1		Smp_128350.1	Smp_001780.1	Smp_153010.1	Smp_022960.1	SmLNCA117029-IBu	SmLNCA102301-IBu	Smp_127690.1	Smp_158320.2		SmLINC149997-IBu
Smp_247800.1	Smp_012740.1		Smp_128370.1	Smp_001830.1	Smp_153160.1	Smp_024500.1	SmLNCA117730-IBu	SmLNCA105812-IBu	Smp_127700.1	Smp_158560.3		SmLINC150048-IBu
Smp_300570.1	Smp_013200.2		Smp_128690.2	Smp_001900.1	Smp_154080.2	Smp_024860.1	SmLNCA120147-IBu	SmLNCA106411-IBu	Smp_127700.3	Smp_158630.1		SmLINC150453-IBu
Smp_302090.1	Smp_013840.3		Smp_129050.1	Smp_001980.1	Smp_154870.1	Smp_024930.1	SmLNCA120496-IBu	SmLNCA106470-IBu	Smp_129010.1	Smp_158630.2		SmLINC150894-IBu
Smp_302470.1	Smp_014290.1		Smp_129610.2	Smp_002640.1	Smp_156060.1	Smp_024970.1	SmLNCA121331-IBu	SmLNCA107501-IBu	Smp_129380.1	Smp_159730.1		SmLINC150962-IBu
Smp_303420.1	Smp_015630.1		Smp_129720.2	Smp_003410.1	Smp_156350.1	Smp_025100.1	SmLNCA123831-IBu	SmLNCA107709-IBu	Smp_129630.1	Smp_160170.1		SmLINC150963-IBu
Smp_305430.2	Smp_015670.1		Smp_129980.1	Smp_003660.1	Smp_156450.1	Smp_025130.1	SmLNCA125095-IBu	SmLNCA107712-IBu	Smp_130260.1	Smp_160590.1		SmLINC151056-IBu
Smp_306180.1	Smp_015710.1		Smp_130110.1	Smp_003900.1	Smp_156850.1	Smp_025360.1	SmLNCA125303-IBu	SmLNCA110421-IBu	Smp_130690.1	Smp_161650.1		SmLINC151300-IBu
Smp_306810.1	Smp_016780.1		Smp_130450.2	Smp_003940.2	Smp_157070.1	Smp_025370.1	SmLNCA125628-IBu	SmLNCA111083-IBu	Smp_130840.1	Smp_163250.1		SmLINC151448-IBu
Smp_307450.1	Smp_017360.1		Smp_130540.4	Smp_003970.1	Smp_157290.1	Smp_025750.1	SmLNCA126245-IBu	SmLNCA111226-IBu	Smp_130900.1	Smp_165680.1		SmLINC151477-IBu
Smp_307550.1	Smp_017420.1		Smp_130800.1	Smp_004260.1	Smp_158430.1	Smp_025890.1	SmLNCA126511-IBu	SmLNCA111434-IBu	Smp_131360.2	Smp_166440.1		SmLINC151826-IBu
Smp_308270.1	Smp_017730.1		Smp_131020.1	Smp_004360.1	Smp_158700.1	Smp_026250.2	SmLNCA130666-IBu	SmLNCA111667-IBu	Smp_131390.1	Smp_166940.1		SmLINC152028-IBu
Smp_308830.3	Smp_018400.4		Smp_131290.1	Smp_004940.1	Smp_159180.1	Smp_026440.1	SmLNCA131061-IBu	SmLNCA111669-IBu	Smp_131680.2	Smp_169040.1		SmLINC152176-IBu
Smp_310180.1	Smp_018430.2		Smp_132850.1	Smp_004990.1	Smp_159910.1	Smp_026630.1	SmLNCA131221-IBu	SmLNCA111737-IBu	Smp_132200.1	Smp_169320.1		SmLINC152177-IBu
Smp_311630.1	Smp_018430.3		Smp_132850.2	Smp_005080.1	Smp_159990.1	Smp_026930.1	SmLNCA131838-IBu	SmLNCA112598-IBu	Smp_132330.2	Smp_169720.1		SmLINC152178-IBu
Smp_311640.1	Smp_019280.1		Smp_132870.1	Smp_005180.1	Smp_160000.1	Smp_027040.3	SmLNCA136615-IBu	SmLNCA112601-IBu	Smp_132390.1	Smp_169940.3		SmLINC152181-IBu
Smp_311660.1	Smp_020050.1		Smp_133050.1	Smp_005390.1	Smp_160850.1	Smp_027850.1	SmLNCA136619-IBu	SmLNCA113270-IBu	Smp_132590.1	Smp_170580.1		SmLINC152254-IBu
Smp_311670.1	Smp_020120.2		Smp_133110.1	Smp_005910.1	Smp_161730.1	Smp_027970.1	SmLNCA137608-IBu	SmLNCA114493-IBu	Smp_132620.1	Smp_170790.1		SmLINC152330-IBu
Smp_312630.1	Smp_020450.2		Smp_133380.2	Smp_006000.1	Smp_162010.1	Smp_027970.2	SmLNCA138594-IBu	SmLNCA115047-IBu	Smp_132640.2	Smp_171630.2		SmLINC152406-IBu
Smp_313810.1	Smp_021390.1		Smp_133490.1	Smp_006340.1	Smp_162100.1	Smp_028210.2	SmLNCA139246-IBu	SmLNCA117862-IBu	Smp_133030.1	Smp_171940.1		SmLINC153236-IBu
Smp_316490.1	Smp_021920.1		Smp_133700.1	Smp_006730.1	Smp_162300.1	Smp_028500.1	SmLNCA140232-IBu	SmLNCA118263-IBu	Smp_133820.1	Smp_172120.2		SmLINC153237-IBu
Smp_317130.1	Smp_023250.1		Smp_134290.1	Smp_006750.2	Smp_162810.1	Smp_028670.1	SmLNCA141523-IBu	SmLNCA118727-IBu	Smp_133900.1	Smp_172160.1		SmLINC153354-IBu
Smp_319500.1	Smp_024580.1		Smp_135500.1	Smp_006780.1	Smp_162970.1	Smp_029070.1	SmLNCA142258-IBu	SmLNCA119964-IBu	Smp_134870.1	Smp_172400.3		SmLINC153865-IBu
Smp_319660.1	Smp_024820.1		Smp_135910.2	Smp_006860.1	Smp_163230.1	Smp_029160.3	SmLNCA143342-IBu	SmLNCA120145-IBu	Smp_135510.2	Smp_172850.1		SmLINC153912-IBu
Smp_320500.1	Smp_025010.1		Smp_136320.1	Smp_006920.1	Smp_163290.1	Smp_029470.2	SmLNCA143549-IBu	SmLNCA120475-IBu	Smp_135940.1	Smp_174780.1		SmLINC154247-IBu
Smp_321910.1	Smp_025150.2		Smp_136350.1	Smp_007000.1	Smp_163980.2	Smp_029700.1	SmLNCA144654-IBu	SmLNCA120770-IBu	Smp_136090.1	Smp_175590.1		SmLINC154343-IBu
Smp_322830.1	Smp_025670.1		Smp_137360.1	Smp_007070.1	Smp_164190.1	Smp_030220.1	SmLNCA145123-IBu	SmLNCA121443-IBu	Smp_136160.2	Smp_175900.1		SmLINC155137-IBu
Smp_323800.1	Smp_025680.1		Smp_137890.1	Smp_007260.1	Smp_165850.1	Smp_030250.1	SmLNCA145876-IBu	SmLNCA121871-IBu	Smp_136190.1	Smp_176420.2		SmLINC155352-IBu
Smp_324820.1	Smp_025740.1		Smp_137930.1	Smp_007290.2	Smp_166390.1	Smp_030320.1	SmLNCA147138-IBu	SmLNCA121922-IBu	Smp_137800.1	Smp_176760.1		SmLINC155355-IBu
Smp_326040.1	Smp_026280.1		Smp_137980.1	Smp_007380.1	Smp_167020.1	Smp_030710.1	SmLNCA147588-IBu	SmLNCA122488-IBu	Smp_137870.1	Smp_177180.3		SmLINC155412-IBu
Smp_326090.1	Smp_027430.2		Smp_138340.1	Smp_007540.2	Smp_167300.1	Smp_030920.2	SmLNCA150387-IBu	SmLNCA123074-IBu	Smp_138900.1	Smp_180690.1		SmLINC155649-IBu
Smp_327030.1	Smp_028190.1		Smp_138520.1	Smp_007960.3	Smp_168040.1	Smp_031270.2	SmLNCA150522-IBu	SmLNCA123859-IBu	Smp_140290.2	Smp_181170.1		SmLINC157360-IBu
Smp_327400.1	Smp_028440.1		Smp_138760.3	Smp_007970.1	Smp_168730.1	Smp_031880.1	SmLNCA151841-IBu	SmLNCA123936-IBu	Smp_140560.2	Smp_191160.1		SmLINC157540-IBu
Smp_327950.1	Smp_028990.1		Smp_138850.2	Smp_008220.1	Smp_169290.2	Smp_031920.2	SmLNCA152076-IBu	SmLNCA123949-IBu	Smp_140830.1	Smp_194780.1		SmLINC157547-IBu
Smp_327950.2	Smp_029800.1		Smp_138880.1	Smp_008220.3	Smp_169640.1	Smp_032000.1	SmLNCA152462-IBu	SmLNCA124367-IBu	Smp_140880.1	Smp_195080.1		SmLINC157814-IBu
Smp_330700.1	Smp_030830.1		Smp_139060.2	Smp_008545.1	Smp_170020.2	Smp_032640.1	SmLNCA152616-IBu	SmLNCA124401-IBu	Smp_141000.1	Smp_196690.1		SmLINC158081-IBu
Smp_331670.1	Smp_030920.1		Smp_139340.1	Smp_008900.1	Smp_170020.3	Smp_033040.1	SmLNCA152659-IBu	SmLNCA125505-IBu	Smp_142880.1	Smp_197390.2		SmLINC158089-IBu
Smp_333010.1	Smp_031100.1		Smp_140590.1	Smp_008900.2	Smp_171170.1	Smp_033050.2	SmLNCA153217-IBu	SmLNCA125903-IBu	Smp_142950.1	Smp_200570.1		SmLINC158152-IBu
Smp_334120.1	Smp_031190.2		Smp_140640.2	Smp_009230.1	Smp_171770.1	Smp_033760.1	SmLNCA154180-IBu	SmLNCA127080-IBu	Smp_142960.1	Smp_201470.1		SmLINC158420-IBu
Smp_334150.1	Smp_031770.1		Smp_140790.2	Smp_009310.1	Smp_172270.1	Smp_034300.1	SmLNCA154183-IBu	SmLNCA127350-IBu	Smp_143440.1	Smp_203190.1		SmLINC159122-IBu
Smp_334330.1	Smp_031770.3		Smp_140810.2	Smp_009600.1	Smp_172540.2	Smp_034550.1	SmLNCA154246-IBu	SmLNCA127776-IBu	Smp_143830.1	Smp_204120.1		SmLINC159183-IBu
Smp_334450.1	Smp_032120.2		Smp_140840.2	Smp_009690.1	Smp_173580.1	Smp_034860.1	SmLNCA154416-IBu	SmLNCA128268-IBu	Smp_144130.1	Smp_204150.1		SmLINC159198-IBu
Smp_336990.1	Smp_032950.1		Smp_141160.1	Smp_010100.1	Smp_174240.1	Smp_034940.2	SmLNCA154804-IBu	SmLNCA129525-IBu	Smp_144170.1	Smp_204260.1		SmLINC159222-IBu
Smp_337090.2	Smp_033000.1		Smp_141290.4	Smp_010140.1	Smp_174510.2	Smp_035090.1	SmLNCA155368-IBu	SmLNCA129750-IBu	Smp_144750.1	Smp_209030.1		SmLINC159256-IBu
Smp_337130.3	Smp_033020.1		Smp_141320.1	Smp_010940.1	Smp_174800.1	Smp_035090.3	SmLNCA156584-IBu	SmLNCA129846-IBu	Smp_145680.1	Smp_209030.2		SmLINC159308-IBu
Smp_337730.1	Smp_033660.1		Smp_141430.1	Smp_011120.1	Smp_175860.1	Smp_035260.1	SmLNCA156875-IBu	SmLNCA130883-IBu	Smp_146060.2	Smp_210130.4		SmLINC159359-IBu
Smp_337800.3	Smp_033930.1		Smp_141820.1	Smp_011640.1	Smp_175910.2	Smp_035260.3	SmLNCA157825-IBu	SmLNCA131840-IBu	Smp_146400.1	Smp_210430.1		SmLINC159372-IBu
Smp_340060.1	Smp_033990.1		Smp_141890.1	Smp_011700.1	Smp_178710.2	Smp_035410.1	SmLNCA160094-IBu	SmLNCA132869-IBu	Smp_146410.1	Smp_210790.1		SmLINC159399-IBu
Smp_340670.1	Smp_034500.1		Smp_142650.2	Smp_011830.1	Smp_178780.1	Smp_035500.1	SmLNCA161179-IBu	SmLNCA135903-IBu	Smp_146440.1	Smp_210860.1		SmLINC159464-IBu
Smp_340760.2	Smp_034840.1		Smp_142710.1	Smp_011860.3	Smp_179560.4	Smp_036060.1	SmLNCA161640-IBu	SmLNCA139285-IBu	Smp_147670.3	Smp_210900.1		SmLINC159487-IBu
Smp_340910.1	Smp_035040.1		Smp_142770.1	Smp_012070.1	Smp_189960.1	Smp_036390.1	SmLNCA161900-IBu	SmLNCA139651-IBu	Smp_147980.4	Smp_210940.2		SmLINC159503-IBu
Smp_341290.1	Smp_035110.1		Smp_143750.1	Smp_012150.2	Smp_194730.1	Smp_037190.1	SmLNCA162057-IBu	SmLNCA139652-IBu	Smp_148120.1	Smp_211130.3		SmLINC159606-IBu
Smp_341580.1	Smp_035290.1		Smp_143810.1	Smp_012350.1	Smp_197480.2	Smp_037400.1	SmLNCA164422-IBu	SmLNCA141286-IBu	Smp_148400.7	Smp_212720.1		SmLINC159731-IBu
Smp_342460.1	Smp_035380.1		Smp_143920.3	Smp_012740.2	Smp_198850.2	Smp_038080.1	SmLNCA164774-IBu	SmLNCA142428-IBu	Smp_148660.2	Smp_212990.2		SmLINC160702-IBu
Smp_343680.2	Smp_035560.1		Smp_144570.2	Smp_012750.1	Smp_198940.1	Smp_038440.1	SmLNCA165218-IBu	SmLNCA142930-IBu	Smp_148910.1	Smp_213620.1		SmLINC161308-IBu
Smp_343700.1	Smp_038710.1		Smp_144860.2	Smp_013050.1	Smp_208080.1	Smp_038940.1	SmLNCA165723-IBu	SmLNCA143550-IBu	Smp_149000.1	Smp_244110.1		SmLINC161311-IBu
Smp_344200.1	Smp_038940.2		Smp_145740.1	Smp_013200.1	Smp_210170.1	Smp_038960.2	SmLNCA165987-IBu	SmLNCA144658-IBu	Smp_149430.1	Smp_244410.1		SmLINC161401-IBu
Smp_344520.1	Smp_039390.1		Smp_146830.3	Smp_013470.1	Smp_210470.1	Smp_039160.3	SmLNCA168904-IBu	SmLNCA145797-IBu	Smp_149660.1	Smp_244890.2		SmLINC161403-IBu
Smp_344810.1	Smp_039650.1		Smp_147330.3	Smp_013810.2	Smp_210680.1	Smp_039300.1	SmLNCA169207-IBu	SmLNCA145807-IBu	Smp_149750.2	Smp_244980.1		SmLINC161421-IBu
Smp_345100.1	Smp_040500.1		Smp_147670.2	Smp_013860.1	Smp_211080.1	Smp_039490.3	SmLNCA169209-IBu	SmLNCA146021-IBu	Smp_149750.3	Smp_245040.1		SmLINC162905-IBu
Smp_345220.1	Smp_040560.2		Smp_148220.3	Smp_014170.1	Smp_211100.1	Smp_039820.2	SmLNCA169735-IBu	SmLNCA146808-IBu	Smp_149950.3	Smp_245380.2		SmLINC163104-IBu
Smp_345770.1	Smp_041370.2		Smp_148510.1	Smp_014650.1	Smp_213020.1	Smp_040190.1	SmLNCA170017-IBu	SmLNCA147223-IBu	Smp_150550.1	Smp_245770.1		SmLINC163682-IBu
Smp_346530.2	Smp_043220.1		Smp_149030.1	Smp_015090.1	Smp_213400.1	Smp_040350.1	SmLNCA170353-IBu	SmLNCA148569-IBu	Smp_150960.1	Smp_245800.5		SmLINC163684-IBu
Smp_347060.1	Smp_043570.1		Smp_149030.3	Smp_015720.1	Smp_213440.1	Smp_040460.1	SmLNCA170699-IBu	SmLNCA148573-IBu	Smp_151030.2	Smp_245960.4		SmLINC163770-IBu
Smp_347370.1	Smp_044950.1		Smp_149170.1	Smp_015780.1	Smp_213690.1	Smp_040560.1	SmLNCA171146-IBu	SmLNCA148722-IBu	Smp_151190.1	Smp_246100.1		SmLINC164113-IBu
	Smp_045220.1		Smp_149980.1	Smp_015900.1	Smp_213980.2	Smp_040710.1	SmLNCA173200-IBu	SmLNCA148725-IBu	Smp_152230.1	Smp_246230.1		SmLINC164115-IBu
	Smp_045250.1		Smp_150350.1	Smp_015980.1	Smp_214050.1	Smp_041050.1	SmLNCA173849-IBu	SmLNCA151883-IBu	Smp_152290.1	Smp_246300.1		SmLINC164116-IBu
	Smp_045260.1		Smp_151410.1	Smp_016870.2	Smp_242740.1	Smp_041730.1	SmLNCA174410-IBu	SmLNCA152180-IBu	Smp_152330.1	Smp_246540.1		SmLINC164120-IBu
	Smp_045430.2		Smp_151410.2	Smp_016900.1	Smp_242930.1	Smp_041730.2	SmLNCA177777-IBu	SmLNCA153788-IBu	Smp_152440.2	Smp_246970.1		SmLINC164441-IBu
	Smp_045960.1		Smp_151660.1	Smp_016990.1	Smp_244100.1	Smp_042050.1	SmLNCA178612-IBu	SmLNCA153794-IBu	Smp_152520.1	Smp_247580.2		SmLINC164599-IBu
	Smp_046060.2		Smp_152760.1	Smp_017280.1	Smp_244530.2	Smp_042390.1	SmLNCS100553-IBu	SmLNCA154179-IBu	Smp_152530.1	Smp_247640.1		SmLINC164628-IBu
	Smp_046290.1		Smp_152960.1	Smp_017430.1	Smp_244530.3	Smp_042920.1	SmLNCS104755-IBu	SmLNCA154336-IBu	Smp_152550.1	Smp_247650.1		SmLINC164710-IBu
	Smp_046880.1		Smp_153410.1	Smp_017430.2	Smp_244570.1	Smp_043030.1	SmLNCS104760-IBu	SmLNCA154876-IBu	Smp_152850.1	Smp_300470.1		SmLINC164713-IBu
	Smp_046880.3		Smp_153590.1	Smp_017470.1	Smp_244830.1	Smp_043070.1	SmLNCS105401-IBu	SmLNCA155363-IBu	Smp_153390.1	Smp_300580.1		SmLINC164920-IBu
	Smp_046890.1		Smp_154490.1	Smp_017650.1	Smp_245420.1	Smp_043610.1	SmLNCS105463-IBu	SmLNCA157199-IBu	Smp_153500.1	Smp_302880.1		SmLINC164921-IBu
	Smp_047090.2		Smp_154730.2	Smp_018310.1	Smp_245780.2	Smp_043610.2	SmLNCS106951-IBu	SmLNCA157361-IBu	Smp_153990.3	Smp_302950.3		SmLINC165094-IBu
	Smp_047090.3		Smp_155340.1	Smp_018400.1	Smp_246410.2	Smp_043670.2	SmLNCS107660-IBu	SmLNCA158526-IBu	Smp_154250.3	Smp_303380.1		SmLINC165185-IBu
	Smp_048240.1		Smp_155360.1	Smp_018440.1	Smp_246570.1	Smp_044060.1	SmLNCS111286-IBu	SmLNCA158527-IBu	Smp_154610.2	Smp_303620.1		SmLINC165615-IBu
	Smp_049240.1		Smp_155480.1	Smp_018870.1	Smp_246670.1	Smp_044470.1	SmLNCS111291-IBu	SmLNCA159728-IBu	Smp_155370.2	Smp_305220.2		SmLINC165896-IBu
	Smp_049380.1		Smp_155740.1	Smp_018990.1	Smp_246700.1	Smp_044470.2	SmLNCS111292-IBu	SmLNCA160095-IBu	Smp_155420.1	Smp_305800.3		SmLINC166182-IBu
	Smp_049520.1		Smp_156960.1	Smp_019050.1	Smp_246870.1	Smp_044970.1	SmLNCS117439-IBu	SmLNCA161191-IBu	Smp_156630.1	Smp_306810.4		SmLINC166190-IBu
	Smp_049730.1		Smp_157300.1	Smp_019890.1	Smp_247180.1	Smp_045060.1	SmLNCS124621-IBu	SmLNCA161345-IBu	Smp_157390.1	Smp_307090.7		SmLINC166252-IBu
	Smp_049890.1		Smp_157570.2	Smp_020220.1	Smp_248080.1	Smp_045300.1	SmLNCS124892-IBu	SmLNCA161849-IBu	Smp_157720.1	Smp_307960.3		SmLINC166533-IBu
	Smp_049930.1		Smp_157590.1	Smp_020400.1	Smp_248160.1	Smp_046430.1	SmLNCS131805-IBu	SmLNCA162926-IBu	Smp_157740.1	Smp_309220.1		SmLINC166534-IBu
	Smp_049970.2		Smp_157660.1	Smp_021080.1	Smp_267220.1	Smp_046690.1	SmLNCS132582-IBu	SmLNCA163144-IBu	Smp_157800.2	Smp_310210.1		SmLINC166536-IBu
	Smp_050520.1		Smp_157920.2	Smp_021140.1	Smp_301160.1	Smp_046790.1	SmLNCS133578-IBu	SmLNCA163313-IBu	Smp_158610.1	Smp_310580.1		SmLINC166544-IBu
	Smp_051010.1		Smp_158130.1	Smp_021550.1	Smp_301780.1	Smp_046870.1	SmLNCS133635-IBu	SmLNCA163677-IBu	Smp_159050.1	Smp_310870.1		SmLINC166549-IBu
	Smp_051290.1		Smp_158140.1	Smp_021590.1	Smp_302460.1	Smp_046980.1	SmLNCS137781-IBu	SmLNCA163798-IBu	Smp_159070.3	Smp_312820.1		SmLINC166736-IBu
	Smp_052060.1		Smp_159100.4	Smp_021760.1	Smp_302740.1	Smp_047190.1	SmLNCS137948-IBu	SmLNCA164378-IBu	Smp_159070.4	Smp_312870.1		SmLINC167345-IBu
	Smp_052350.1		Smp_159690.1	Smp_022170.1	Smp_302740.3	Smp_047440.1	SmLNCS144642-IBu	SmLNCA164453-IBu	Smp_159140.1	Smp_313450.1		SmLINC167347-IBu
	Smp_053030.1		Smp_160760.2	Smp_022430.1	Smp_303320.1	Smp_047460.1	SmLNCS144799-IBu	SmLNCA164564-IBu	Smp_160600.2	Smp_313820.1		SmLINC167563-IBu
	Smp_053560.1		Smp_161080.1	Smp_022450.1	Smp_304370.2	Smp_047540.1	SmLNCS145496-IBu	SmLNCA164776-IBu	Smp_160950.1	Smp_314280.2		SmLINC167834-IBu
	Smp_053990.1		Smp_161140.1	Smp_022640.1	Smp_305220.3	Smp_047720.1	SmLNCS146212-IBu	SmLNCA164781-IBu	Smp_161130.3	Smp_315880.1		SmLINC167835-IBu
	Smp_057130.1		Smp_161250.1	Smp_022660.2	Smp_307080.2	Smp_048980.1	SmLNCS147673-IBu	SmLNCA164947-IBu	Smp_161290.1	Smp_316530.1		SmLINC167838-IBu
	Smp_057130.2		Smp_162030.2	Smp_022810.2	Smp_307400.1	Smp_049140.3	SmLNCS152831-IBu	SmLNCA165072-IBu	Smp_161540.1	Smp_317240.1		SmLINC167848-IBu
	Smp_058190.2		Smp_162290.1	Smp_023660.1	Smp_309690.1	Smp_049330.2	SmLNCS157579-IBu	SmLNCA165134-IBu	Smp_162380.3	Smp_319270.2		SmLINC167855-IBu
	Smp_059600.2		Smp_162860.1	Smp_024000.1	Smp_310080.1	Smp_049510.2	SmLNCS158075-IBu	SmLNCA165276-IBu	Smp_162710.1	Smp_319620.1		SmLINC167904-IBu
	Smp_059710.2		Smp_163430.2	Smp_024140.1	Smp_311360.1	Smp_049680.1	SmLNCS159008-IBu	SmLNCA165353-IBu	Smp_163030.1	Smp_320870.1		SmLINC167905-IBu
	Smp_060570.1		Smp_163760.1	Smp_024180.3	Smp_311440.1	Smp_049740.1	SmLNCS160446-IBu	SmLNCA165594-IBu	Smp_163210.2	Smp_321400.1		SmLINC167906-IBu
	Smp_062080.2		Smp_163820.2	Smp_024390.1	Smp_312660.3	Smp_049880.1	SmLNCS160743-IBu	SmLNCA165740-IBu	Smp_163450.1	Smp_322730.1		SmLINC168176-IBu
	Smp_062890.1		Smp_165200.2	Smp_024850.1	Smp_316180.2	Smp_049970.1	SmLNCS160744-IBu	SmLNCA166506-IBu	Smp_163460.1	Smp_323830.1		SmLINC168177-IBu
	Smp_063070.1		Smp_166550.1	Smp_024850.2	Smp_316270.1	Smp_050080.1	SmLNCS176486-IBu	SmLNCA168342-IBu	Smp_163620.1	Smp_326410.1		SmLINC168816-IBu
	Smp_063190.1		Smp_166550.2	Smp_025550.1	Smp_316750.1	Smp_050430.1	SmLNCS176724-IBu	SmLNCA168685-IBu	Smp_163640.2	Smp_326770.3		SmLINC168821-IBu
	Smp_063390.1		Smp_166820.1	Smp_025570.1	Smp_317210.1	Smp_050470.1	SmLNCS178403-IBu	SmLNCA168905-IBu	Smp_164180.1	Smp_327400.2		SmLINC168833-IBu
	Smp_063420.1		Smp_166890.1	Smp_025860.1	Smp_319730.1	Smp_050740.1	Smp_000040.1	SmLNCA169208-IBu	Smp_164500.1	Smp_327590.1		SmLINC168839-IBu
	Smp_064320.1		Smp_168370.5	Smp_026030.1	Smp_320280.1	Smp_050760.1	Smp_000100.1	SmLNCA169265-IBu	Smp_164940.1	Smp_328220.1		SmLINC168843-IBu
	Smp_064350.1		Smp_168800.1	Smp_026190.1	Smp_320400.1	Smp_050890.2	Smp_000100.6	SmLNCA169466-IBu	Smp_165690.1	Smp_328400.1		SmLINC168844-IBu
	Smp_064510.1		Smp_168930.1	Smp_026340.1	Smp_322780.1	Smp_051000.1	Smp_000200.1	SmLNCA169546-IBu	Smp_166120.1	Smp_329840.1		SmLINC168926-IBu
	Smp_065120.1		Smp_169550.1	Smp_026790.1	Smp_323430.1	Smp_051280.1	Smp_000260.1	SmLNCA169692-IBu	Smp_166120.2	Smp_330010.1		SmLINC169144-IBu
	Smp_065890.1		Smp_169780.3	Smp_027210.1	Smp_327270.2	Smp_051530.1	Smp_000340.1	SmLNCA170288-IBu	Smp_166220.1	Smp_330650.1		SmLINC170154-IBu
	Smp_066960.1		Smp_169940.1	Smp_027880.1	Smp_328900.1	Smp_051810.1	Smp_000370.1	SmLNCA170372-IBu	Smp_167330.1	Smp_331490.1		SmLINC170156-IBu
	Smp_067480.2		Smp_170350.1	Smp_028050.1	Smp_332630.1	Smp_052330.1	Smp_000510.1	SmLNCA170785-IBu	Smp_167410.1	Smp_331530.1		SmLINC170661-IBu
	Smp_067520.1		Smp_170380.1	Smp_028120.2	Smp_332700.1	Smp_052350.2	Smp_000580.1	SmLNCA171986-IBu	Smp_167920.3	Smp_331780.1		SmLINC170867-IBu
	Smp_068500.1		Smp_170810.1	Smp_028340.1	Smp_332790.1	Smp_052630.1	Smp_000600.2	SmLNCA172556-IBu	Smp_169300.1	Smp_331820.1		SmLINC172878-IBu
	Smp_068510.1		Smp_171540.1	Smp_028690.1	Smp_333100.1	Smp_052740.1	Smp_000790.1	SmLNCA173040-IBu	Smp_169520.1	Smp_331900.1		SmLINC172880-IBu
	Smp_069240.2		Smp_172050.1	Smp_029240.1	Smp_333160.1	Smp_052780.1	Smp_000790.2	SmLNCA174356-IBu	Smp_169670.1	Smp_332260.1		SmLINC172882-IBu
	Smp_069770.1		Smp_172090.1	Smp_029740.1	Smp_333350.1	Smp_053160.2	Smp_000870.2	SmLNCA174753-IBu	Smp_169800.2	Smp_333240.1		SmLINC172982-IBu
	Smp_069890.1		Smp_172200.1	Smp_029740.2	Smp_334030.2	Smp_053550.2	Smp_000870.3	SmLNCA176031-IBu	Smp_170150.3	Smp_334210.1		SmLINC173018-IBu
	Smp_071960.1		Smp_172780.2	Smp_030010.1	Smp_334190.1	Smp_053640.1	Smp_000880.1	SmLNCA176146-IBu	Smp_170300.1	Smp_334530.2		SmLINC173291-IBu
	Smp_072140.1		Smp_173000.1	Smp_030330.1	Smp_334300.2	Smp_054350.1	Smp_001020.1	SmLNCA176220-IBu	Smp_170400.1	Smp_334880.1		SmLINC173362-IBu
	Smp_072180.1		Smp_173010.1	Smp_030690.1	Smp_335010.1	Smp_054820.3	Smp_001100.1	SmLNCA176359-IBu	Smp_170950.2	Smp_335750.1		SmLINC173565-IBu
	Smp_072210.1		Smp_173230.1	Smp_030730.1	Smp_336080.2	Smp_055050.1	Smp_001160.1	SmLNCA177023-IBu	Smp_171070.1	Smp_335760.1		SmLINC173669-IBu
	Smp_072330.1		Smp_173730.3	Smp_030860.2	Smp_336110.1	Smp_055100.1	Smp_001210.1	SmLNCA177024-IBu	Smp_171200.1	Smp_335760.2		SmLINC173738-IBu
	Smp_072360.1		Smp_174390.1	Smp_030930.3	Smp_336350.2	Smp_055390.1	Smp_002080.1	SmLNCA177295-IBu	Smp_172130.1	Smp_335930.2		SmLINC174051-IBu
	Smp_072720.1		Smp_174630.1	Smp_031050.1	Smp_337330.3	Smp_055600.1	Smp_002410.1	SmLNCA177776-IBu	Smp_172460.1	Smp_337070.1		SmLINC174447-IBu
	Smp_072990.1		Smp_174810.2	Smp_031190.4	Smp_337460.1	Smp_055720.1	Smp_002740.1	SmLNCA178444-IBu	Smp_172520.1	Smp_340690.1		SmLINC174474-IBu
	Smp_073140.1		Smp_174890.2	Smp_031570.1	Smp_337620.1	Smp_055760.1	Smp_003130.1	SmLNCS100662-IBu	Smp_173060.1	Smp_340880.2		SmLINC174498-IBu
	Smp_073210.1		Smp_175270.1	Smp_031590.1	Smp_340260.1	Smp_055920.1	Smp_003190.1	SmLNCS101685-IBu	Smp_173060.4	Smp_341750.1		SmLINC174796-IBu
	Smp_073270.1		Smp_175420.1	Smp_031710.1	Smp_340290.1	Smp_056240.1	Smp_003230.1	SmLNCS103497-IBu	Smp_173140.1	Smp_341870.1		SmLINC174916-IBu
	Smp_073280.1		Smp_175810.1	Smp_031730.1	Smp_340360.1	Smp_056930.1	Smp_003270.1	SmLNCS104806-IBu	Smp_173550.1	Smp_342610.1		SmLINC175528-IBu
	Smp_073800.1		Smp_175930.1	Smp_032060.2	Smp_340380.1	Smp_057430.1	Smp_003860.1	SmLNCS107324-IBu	Smp_175840.2	Smp_342660.1		SmLINC175576-IBu
	Smp_074140.1		Smp_176350.1	Smp_032120.1	Smp_340400.1	Smp_057530.1	Smp_003990.1	SmLNCS107932-IBu	Smp_176290.1	Smp_342730.2		SmLINC176438-IBu
	Smp_074560.3		Smp_176410.1	Smp_032260.1	Smp_340700.1	Smp_057530.2	Smp_004000.2	SmLNCS111880-IBu	Smp_176630.2	Smp_343570.2		SmLINC176853-IBu
	Smp_075030.1		Smp_176630.1	Smp_032260.2	Smp_341490.1	Smp_058880.1	Smp_004190.1	SmLNCS116190-IBu	Smp_177080.1	Smp_343720.1		SmLINC177082-IBu
	Smp_076560.1		Smp_178990.2	Smp_032500.1	Smp_341740.2	Smp_058980.1	Smp_004420.4	SmLNCS117403-IBu	Smp_178990.1	Smp_344140.1		SmLINC177089-IBu
	Smp_076600.1		Smp_180370.1	Smp_032510.1	Smp_341950.1	Smp_059130.4	Smp_004640.2	SmLNCS121553-IBu	Smp_179350.1	Smp_345080.2		SmLINC177208-IBu
	Smp_076630.1		Smp_180500.2	Smp_032580.1	Smp_342190.1	Smp_059200.1	Smp_004730.1	SmLNCS122508-IBu	Smp_179560.2	Smp_345350.1		SmLINC177328-IBu
	Smp_076660.1		Smp_181480.1	Smp_032760.1	Smp_343200.1	Smp_059570.1	Smp_004780.1	SmLNCS124890-IBu	Smp_179720.2	Smp_345490.1		SmLINC177330-IBu
	Smp_078730.1		Smp_193150.2	Smp_032800.1	Smp_343200.2	Smp_059780.1	Smp_004910.1	SmLNCS126250-IBu	Smp_179930.2	Smp_345840.3		SmLINC177349-IBu
	Smp_080370.1		Smp_194520.3	Smp_032810.1	Smp_344560.1	Smp_060180.1	Smp_004980.1	SmLNCS128333-IBu	Smp_180160.1	Smp_346030.1		SmLINC177487-IBu
	Smp_080530.1		Smp_194740.1	Smp_033350.1	Smp_344980.1	Smp_060420.1	Smp_005140.1	SmLNCS129573-IBu	Smp_180900.3	Smp_346630.1		SmLINC177514-IBu
	Smp_080920.1		Smp_196790.2	Smp_033700.1	Smp_345540.3	Smp_060660.1	Smp_005160.2	SmLNCS129872-IBu	Smp_187090.1	Smp_346640.2		SmLINC177740-IBu
	Smp_081140.3		Smp_196810.2	Smp_034080.1	Smp_345630.1	Smp_060700.1	Smp_005190.1	SmLNCS133574-IBu	Smp_194070.1	Smp_346990.1		SmLINC177897-IBu
	Smp_081380.1		Smp_197700.1	Smp_034300.2	Smp_346140.1	Smp_060700.2	Smp_005260.1	SmLNCS134269-IBu	Smp_194580.1	Smp_347740.2		SmLINC177898-IBu
	Smp_081430.1		Smp_198020.1	Smp_034430.1	Smp_346350.1	Smp_061570.1	Smp_005330.2	SmLNCS137022-IBu	Smp_194800.1	Smp_347760.2		SmLINC177899-IBu
	Smp_081900.1		Smp_198590.2	Smp_034490.1	Smp_346840.2	Smp_062080.3	Smp_005640.1	SmLNCS139238-IBu	Smp_196020.1	Smp_347910.1		SmLINC178139-IBu
	Smp_082780.1		Smp_198940.3	Smp_034920.1	Smp_347410.1	Smp_062790.1	Smp_005790.2	SmLNCS143140-IBu	Smp_196230.1	Smp_900030.1		SmLINC178141-IBu
	Smp_083020.1		Smp_200190.1	Smp_034980.4		Smp_063030.1	Smp_005880.1	SmLNCS144387-IBu	Smp_196510.1			SmLINC178188-IBu
	Smp_084010.1		Smp_203030.1	Smp_035190.1		Smp_063670.1	Smp_006590.2	SmLNCS146189-IBu	Smp_196810.1			SmLINC178417-IBu
	Smp_084600.1		Smp_203390.2	Smp_035270.1		Smp_063830.1	Smp_006860.2	SmLNCS147838-IBu	Smp_198420.1			SmLINC178442-IBu
	Smp_085540.1		Smp_203630.1	Smp_035460.5		Smp_064430.1	Smp_007210.2	SmLNCS151512-IBu	Smp_198750.1			SmLINC178624-IBu
	Smp_085840.1		Smp_210280.2	Smp_035470.1		Smp_064750.2	Smp_007450.1	SmLNCS158069-IBu	Smp_198930.1			SmLINC178698-IBu
	Smp_085910.1		Smp_210550.2	Smp_035650.1		Smp_065370.1	Smp_007630.1	SmLNCS158073-IBu	Smp_201810.1			SmLINC178699-IBu
	Smp_086030.1		Smp_211040.1	Smp_035790.1		Smp_065610.1	Smp_008140.1	SmLNCS160186-IBu	Smp_203970.1			SmLINC178729-IBu
	Smp_086330.1		Smp_211320.1	Smp_035800.1		Smp_066410.1	Smp_008710.1	SmLNCS172904-IBu	Smp_204720.1			SmLINC178737-IBu
	Smp_086530.1		Smp_212840.1	Smp_036180.1		Smp_066760.1	Smp_008850.1	SmLNCS173093-IBu	Smp_207000.1			SmLINC178739-IBu
	Smp_087620.1		Smp_213000.1	Smp_036250.1		Smp_067280.1	Smp_009070.1	SmLNCS176110-IBu	Smp_210090.1			SmLINC178743-IBu
	Smp_087870.1		Smp_213260.4	Smp_036400.1		Smp_067780.1	Smp_009630.1	SmLNCS177282-IBu	Smp_210180.1			SmLINC178744-IBu
	Smp_087930.2		Smp_213290.2	Smp_036780.1		Smp_068070.2	Smp_009800.2	SmLNCS177312-IBu	Smp_210480.1			SmLINC178790-IBu
	Smp_088920.1		Smp_213290.3	Smp_036940.1		Smp_068100.1	Smp_010090.1	SmLNCS177919-IBu	Smp_210660.1			SmLNCA100890-IBu
	Smp_089200.1		Smp_213420.1	Smp_036980.1		Smp_068170.1	Smp_010110.1	SmLNCS178485-IBu	Smp_210660.3			SmLNCA101962-IBu
	Smp_089460.1		Smp_213480.1	Smp_037900.1		Smp_068250.1	Smp_010160.1	Smp_000020.1	Smp_210670.2			SmLNCA102013-IBu
	Smp_089670.1		Smp_213550.1	Smp_037910.1		Smp_068270.2	Smp_010380.1	Smp_000030.2	Smp_212340.1			SmLNCA103535-IBu
	Smp_089870.1		Smp_214100.1	Smp_038240.1		Smp_068530.1	Smp_010550.3	Smp_000030.3	Smp_212780.1			SmLNCA104475-IBu
	Smp_090920.1		Smp_214240.1	Smp_038340.1		Smp_068840.1	Smp_010800.4	Smp_000040.2	Smp_213050.1			SmLNCA104733-IBu
	Smp_091840.2		Smp_241450.1	Smp_038510.1		Smp_069130.1	Smp_011230.2	Smp_000100.2	Smp_213180.3			SmLNCA104792-IBu
	Smp_092850.1		Smp_241480.1	Smp_038840.1		Smp_069170.1	Smp_011270.2	Smp_000100.5	Smp_213520.1			SmLNCA105076-IBu
	Smp_093670.1		Smp_241960.1	Smp_039080.2		Smp_069240.1	Smp_011660.3	Smp_000130.1	Smp_213680.1			SmLNCA106569-IBu
	Smp_093950.1		Smp_242440.1	Smp_039390.2		Smp_070340.1	Smp_011960.1	Smp_000160.1	Smp_213970.1			SmLNCA106746-IBu
	Smp_094250.1		Smp_243000.1	Smp_039400.1		Smp_070710.1	Smp_012000.1	Smp_000180.1	Smp_214110.1			SmLNCA107194-IBu
	Smp_094320.1		Smp_243700.3	Smp_039490.2		Smp_070860.2	Smp_012050.1	Smp_000270.1	Smp_214180.1			SmLNCA107268-IBu
	Smp_094330.2		Smp_243720.1	Smp_039740.1		Smp_071540.1	Smp_012380.1	Smp_000280.1	Smp_242530.3			SmLNCA108268-IBu
	Smp_094380.1		Smp_243840.1	Smp_039750.1		Smp_071550.1	Smp_012670.1	Smp_000310.2	Smp_242670.1			SmLNCA108960-IBu
	Smp_094420.1		Smp_244020.2	Smp_039750.2		Smp_072110.1	Smp_012720.1	Smp_000310.3	Smp_242830.2			SmLNCA109214-IBu
	Smp_094930.1		Smp_244340.1	Smp_039750.3		Smp_072320.1	Smp_012860.2	Smp_000390.1	Smp_242960.1			SmLNCA109971-IBu
	Smp_096760.1		Smp_244440.1	Smp_040020.1		Smp_072450.1	Smp_013080.1	Smp_000420.1	Smp_243870.1			SmLNCA110438-IBu
	Smp_096790.1		Smp_244620.1	Smp_040500.3		Smp_073200.1	Smp_013150.2	Smp_000430.1	Smp_244900.3			SmLNCA110649-IBu
	Smp_099690.1		Smp_245350.2	Smp_040510.1		Smp_073470.1	Smp_013360.2	Smp_000470.3	Smp_245140.1			SmLNCA110783-IBu
	Smp_099930.1		Smp_245480.1	Smp_040560.3		Smp_073570.1	Smp_013440.1	Smp_000480.1	Smp_245140.3			SmLNCA111194-IBu
	Smp_102040.1		Smp_245630.1	Smp_040790.1		Smp_074020.1	Smp_013690.1	Smp_000650.2	Smp_245890.1			SmLNCA111585-IBu
	Smp_102160.1		Smp_245720.1	Smp_040800.2		Smp_074070.1	Smp_014020.2	Smp_000670.1	Smp_245920.1			SmLNCA111587-IBu
	Smp_102240.1		Smp_246050.4	Smp_041600.1		Smp_074450.2	Smp_014430.1	Smp_000680.1	Smp_245990.1			SmLNCA111871-IBu
	Smp_102840.2		Smp_246170.1	Smp_041740.1		Smp_074560.1	Smp_014800.2	Smp_000700.1	Smp_246610.2			SmLNCA111978-IBu
	Smp_103460.1		Smp_246260.2	Smp_042050.2		Smp_074870.1	Smp_015100.1	Smp_000820.1	Smp_246920.1			SmLNCA112035-IBu
	Smp_104110.1		Smp_246500.1	Smp_042090.1		Smp_075210.1	Smp_015530.1	Smp_000820.2	Smp_246950.1			SmLNCA112137-IBu
	Smp_104120.2		Smp_247190.1	Smp_042110.1		Smp_076400.1	Smp_015780.2	Smp_000910.1	Smp_247270.1			SmLNCA113269-IBu
	Smp_105040.1		Smp_247250.2	Smp_042420.1		Smp_076450.1	Smp_015880.2	Smp_001070.1	Smp_247290.1			SmLNCA113879-IBu
	Smp_105220.1		Smp_247300.1	Smp_042560.1		Smp_076650.2	Smp_016250.1	Smp_001080.1	Smp_247560.1			SmLNCA114013-IBu
	Smp_105960.1		Smp_247480.1	Smp_042770.1		Smp_078550.1	Smp_016490.1	Smp_001120.1	Smp_248110.1			SmLNCA114139-IBu
	Smp_106010.1		Smp_300370.1	Smp_042920.2		Smp_078550.2	Smp_016630.1	Smp_001170.2	Smp_266720.2			SmLNCA114735-IBu
	Smp_120700.1		Smp_300940.1	Smp_043570.2		Smp_078700.1	Smp_016810.1	Smp_001360.1	Smp_266810.1			SmLNCA115921-IBu
	Smp_121160.1		Smp_302290.1	Smp_044280.1		Smp_078780.1	Smp_016910.1	Smp_001390.1	Smp_266850.1			SmLNCA117441-IBu
	Smp_121160.2		Smp_302850.3	Smp_044610.1		Smp_079000.1	Smp_017230.1	Smp_001420.1	Smp_266890.1			SmLNCA117544-IBu
	Smp_121390.1		Smp_302880.2	Smp_045410.1		Smp_079760.1	Smp_017750.1	Smp_001420.2	Smp_266920.1			SmLNCA117861-IBu
	Smp_121660.1		Smp_303590.1	Smp_045420.1		Smp_080130.1	Smp_018240.1	Smp_001560.1	Smp_267020.1			SmLNCA118563-IBu
	Smp_121940.1		Smp_303940.1	Smp_045420.2		Smp_080560.1	Smp_018250.1	Smp_001610.1	Smp_267040.1			SmLNCA118902-IBu
	Smp_121950.3		Smp_304800.5	Smp_045710.1		Smp_080700.1	Smp_018260.1	Smp_001940.1	Smp_267110.1			SmLNCA118917-IBu
	Smp_122900.1		Smp_304910.1	Smp_045730.1		Smp_080850.1	Smp_018310.2	Smp_002380.1	Smp_300190.1			SmLNCA119978-IBu
	Smp_123020.1		Smp_306350.1	Smp_045750.1		Smp_081140.1	Smp_018360.2	Smp_002600.2	Smp_300390.1			SmLNCA120172-IBu
	Smp_123710.2		Smp_307270.1	Smp_045810.2		Smp_081140.4	Smp_018400.2	Smp_003000.1	Smp_302360.1			SmLNCA120237-IBu
	Smp_124080.1		Smp_309680.1	Smp_046090.1		Smp_081190.1	Smp_018580.1	Smp_003140.1	Smp_302870.1			SmLNCA120723-IBu
	Smp_124240.1		Smp_310510.2	Smp_046100.1		Smp_082370.1	Smp_018680.1	Smp_003280.1	Smp_303270.1			SmLNCA121005-IBu
	Smp_124340.1		Smp_311740.1	Smp_046500.2		Smp_083180.1	Smp_018800.1	Smp_003660.2	Smp_303390.1			SmLNCA121058-IBu
	Smp_124860.2		Smp_311920.3	Smp_046690.2		Smp_083790.1	Smp_018940.1	Smp_003700.1	Smp_303690.3			SmLNCA121342-IBu
	Smp_125300.2		Smp_313110.1	Smp_047090.1		Smp_083980.1	Smp_018980.1	Smp_003760.1	Smp_304450.1			SmLNCA121439-IBu
	Smp_125740.2		Smp_313640.2	Smp_047200.1		Smp_084320.1	Smp_019010.1	Smp_003760.2	Smp_306300.1			SmLNCA122556-IBu
	Smp_125780.2		Smp_314120.1	Smp_047360.1		Smp_084380.1	Smp_019100.1	Smp_003940.3	Smp_306360.6			SmLNCA123009-IBu
	Smp_125810.1		Smp_314150.1	Smp_047360.3		Smp_084540.4	Smp_019170.1	Smp_004160.1	Smp_306610.1			SmLNCA123073-IBu
	Smp_125890.1		Smp_314240.1	Smp_047400.2		Smp_084870.1	Smp_019260.1	Smp_004200.1	Smp_307360.1			SmLNCA124772-IBu
	Smp_126020.1		Smp_315700.1	Smp_047540.3		Smp_085110.1	Smp_019750.1	Smp_004630.1	Smp_309970.1			SmLNCA126318-IBu
	Smp_126170.1		Smp_315700.3	Smp_047610.1		Smp_085740.1	Smp_019760.1	Smp_004690.1	Smp_309970.2			SmLNCA126563-IBu
	Smp_126240.1		Smp_316090.1	Smp_047620.1		Smp_085790.1	Smp_019900.1	Smp_004810.1	Smp_310880.1			SmLNCA127200-IBu
	Smp_126420.1		Smp_316380.2	Smp_047740.1		Smp_086460.1	Smp_019980.1	Smp_004820.1	Smp_311350.2			SmLNCA127339-IBu
	Smp_126520.1		Smp_317020.1	Smp_047870.1		Smp_087520.2	Smp_019990.1	Smp_005020.1	Smp_311450.1			SmLNCA127349-IBu
	Smp_126620.1		Smp_318510.1	Smp_048260.1		Smp_087940.1	Smp_020070.2	Smp_005070.1	Smp_312390.1			SmLNCA127433-IBu
	Smp_126670.1		Smp_319060.1	Smp_048260.2		Smp_088460.1	Smp_020120.1	Smp_005070.2	Smp_312620.1			SmLNCA127588-IBu
	Smp_126680.3		Smp_319220.1	Smp_048660.1		Smp_088550.2	Smp_020130.1	Smp_005190.2	Smp_314210.1			SmLNCA128889-IBu
	Smp_126720.4		Smp_319320.1	Smp_048760.1		Smp_088600.1	Smp_020270.1	Smp_005230.1	Smp_314220.1			SmLNCA129261-IBu
	Smp_127460.1		Smp_319330.1	Smp_048870.1		Smp_089630.1	Smp_020300.3	Smp_005260.2	Smp_317370.1			SmLNCA129582-IBu
	Smp_127500.1		Smp_319790.1	Smp_049270.1		Smp_089700.1	Smp_020400.2	Smp_005320.1	Smp_317370.3			SmLNCA129939-IBu
	Smp_127500.3		Smp_320240.1	Smp_049990.2		Smp_089860.1	Smp_020480.2	Smp_005470.1	Smp_317540.1			SmLNCA130262-IBu
	Smp_127520.1		Smp_321840.1	Smp_050520.3		Smp_090140.1	Smp_020550.2	Smp_005790.1	Smp_318480.1			SmLNCA130282-IBu
	Smp_127810.1		Smp_321890.1	Smp_050570.1		Smp_090240.1	Smp_020550.3	Smp_005900.1	Smp_318540.1			SmLNCA130305-IBu
	Smp_127820.1		Smp_322380.1	Smp_050830.2		Smp_090440.1	Smp_021370.1	Smp_006060.1	Smp_318550.1			SmLNCA130649-IBu
	Smp_127860.1		Smp_322970.2	Smp_050880.2		Smp_090930.1	Smp_021370.2	Smp_006250.1	Smp_319120.1			SmLNCA131062-IBu
	Smp_127920.1		Smp_322980.1	Smp_050940.1		Smp_091000.1	Smp_021390.2	Smp_006250.2	Smp_321250.1			SmLNCA131834-IBu
	Smp_128370.4		Smp_324860.1	Smp_051080.1		Smp_091380.1	Smp_021600.1	Smp_006320.1	Smp_321540.3			SmLNCA132427-IBu
	Smp_129050.2		Smp_324910.1	Smp_051260.1		Smp_091390.1	Smp_021600.2	Smp_006350.1	Smp_322650.1			SmLNCA132872-IBu
	Smp_129240.1		Smp_325350.1	Smp_051360.1		Smp_091730.1	Smp_021730.1	Smp_006390.1	Smp_323690.1			SmLNCA134860-IBu
	Smp_129310.1		Smp_325350.2	Smp_051390.1		Smp_091740.1	Smp_021960.4	Smp_006440.1	Smp_324080.2			SmLNCA137601-IBu
	Smp_129310.2		Smp_326250.1	Smp_051400.1		Smp_091740.2	Smp_022070.1	Smp_006550.1	Smp_325290.1			SmLNCA137602-IBu
	Smp_129510.1		Smp_327210.1	Smp_052280.1		Smp_091820.2	Smp_022400.1	Smp_006560.1	Smp_328000.1			SmLNCA137743-IBu
	Smp_130270.3		Smp_329010.1	Smp_052790.1		Smp_092320.2	Smp_023150.1	Smp_006590.1	Smp_329270.1			SmLNCA139616-IBu
	Smp_130520.4		Smp_330160.1	Smp_052870.1		Smp_093230.1	Smp_023160.1	Smp_006700.1	Smp_329280.2			SmLNCA140501-IBu
	Smp_130540.1		Smp_330630.1	Smp_053040.1		Smp_093280.1	Smp_023840.1	Smp_006840.1	Smp_329820.1			SmLNCA141726-IBu
	Smp_130790.1		Smp_331320.1	Smp_053130.1		Smp_093780.1	Smp_023930.1	Smp_006850.1	Smp_330500.2			SmLNCA142259-IBu
	Smp_131600.1		Smp_331390.1	Smp_053420.1		Smp_093840.1	Smp_023940.2	Smp_007170.1	Smp_330630.2			SmLNCA142260-IBu
	Smp_131680.1		Smp_331910.1	Smp_053610.1		Smp_094330.3	Smp_024010.1	Smp_007210.1	Smp_331940.1			SmLNCA142708-IBu
	Smp_131790.1		Smp_331980.2	Smp_053700.1		Smp_095140.1	Smp_024110.1	Smp_007270.1	Smp_332280.1			SmLNCA143233-IBu
	Smp_131990.2		Smp_332420.1	Smp_053830.1		Smp_095190.1	Smp_024120.1	Smp_007500.1	Smp_332900.1			SmLNCA144928-IBu
	Smp_132180.3		Smp_332860.2	Smp_054120.2		Smp_095910.1	Smp_024370.1	Smp_007510.2	Smp_333330.1			SmLNCA145895-IBu
	Smp_132550.1		Smp_332860.3	Smp_054230.2		Smp_096010.1	Smp_024380.2	Smp_007540.1	Smp_333390.2			SmLNCA147147-IBu
	Smp_133310.1		Smp_333120.1	Smp_054340.1		Smp_096520.1	Smp_024490.1	Smp_007670.1	Smp_334030.1			SmLNCA147303-IBu
	Smp_133790.1		Smp_333740.1	Smp_054600.1		Smp_096640.2	Smp_025510.1	Smp_007690.1	Smp_334420.2			SmLNCA147738-IBu
	Smp_134440.1		Smp_333770.1	Smp_054610.1		Smp_097020.1	Smp_025550.2	Smp_007710.3	Smp_334710.1			SmLNCA148578-IBu
	Smp_134720.1		Smp_333940.2	Smp_054620.1		Smp_097210.1	Smp_025620.1	Smp_007760.1	Smp_334750.1			SmLNCA148720-IBu
	Smp_134940.1		Smp_334140.1	Smp_054620.2		Smp_097280.1	Smp_026090.1	Smp_007900.1	Smp_334750.3			SmLNCA148721-IBu
	Smp_134960.1		Smp_334180.1	Smp_054840.1		Smp_097700.1	Smp_026190.2	Smp_007960.1	Smp_335340.1			SmLNCA148723-IBu
	Smp_135100.1		Smp_334890.1	Smp_055050.2		Smp_098320.5	Smp_026390.1	Smp_008230.1	Smp_335880.1			SmLNCA149927-IBu
	Smp_135770.1		Smp_336280.1	Smp_055090.1		Smp_098980.2	Smp_026390.2	Smp_008290.2	Smp_336100.1			SmLNCA150080-IBu
	Smp_135980.1		Smp_336280.2	Smp_055200.2		Smp_099170.1	Smp_026400.1	Smp_008430.1	Smp_336120.1			SmLNCA152256-IBu
	Smp_136200.1		Smp_336330.2	Smp_055800.1		Smp_099570.1	Smp_026560.2	Smp_008660.3	Smp_336180.1			SmLNCA153201-IBu
	Smp_136240.1		Smp_336650.3	Smp_056370.1		Smp_099850.3	Smp_026630.2	Smp_008900.3	Smp_337260.2			SmLNCA153644-IBu
	Smp_136710.2		Smp_337140.3	Smp_056640.1		Smp_101310.1	Smp_026910.1	Smp_009250.1	Smp_337400.2			SmLNCA153672-IBu
	Smp_136850.1		Smp_337240.1	Smp_056900.1		Smp_101370.1	Smp_027040.4	Smp_009320.1	Smp_337470.1			SmLNCA154027-IBu
	Smp_136950.2		Smp_337390.1	Smp_057230.1		Smp_102840.1	Smp_027340.1	Smp_009430.1	Smp_337510.1			SmLNCA154312-IBu
	Smp_137210.1		Smp_337410.2	Smp_057620.1		Smp_103540.1	Smp_027870.1	Smp_009550.1	Smp_337700.1			SmLNCA154329-IBu
	Smp_137250.1		Smp_337790.3	Smp_057650.1		Smp_103810.1	Smp_027910.1	Smp_009800.1	Smp_337780.2			SmLNCA156206-IBu
	Smp_137410.2		Smp_340250.1	Smp_058140.2		Smp_103930.1	Smp_028980.1	Smp_009830.1	Smp_340110.1			SmLNCA156396-IBu
	Smp_137580.1		Smp_340280.1	Smp_058190.1		Smp_104500.1	Smp_028980.2	Smp_009990.2	Smp_340510.2			SmLNCA156915-IBu
	Smp_137750.1		Smp_340370.2	Smp_058350.1		Smp_104500.3	Smp_029360.1	Smp_010250.1	Smp_340800.1			SmLNCA157273-IBu
	Smp_137840.1		Smp_340970.1	Smp_058410.1		Smp_104630.1	Smp_029370.1	Smp_010260.1	Smp_341030.2			SmLNCA157357-IBu
	Smp_137870.2		Smp_341200.1	Smp_058460.1		Smp_104710.2	Smp_029850.1	Smp_010620.3	Smp_341400.1			SmLNCA157443-IBu
	Smp_138310.1		Smp_341330.1	Smp_058850.1		Smp_104730.1	Smp_029890.1	Smp_010720.1	Smp_341590.2			SmLNCA157701-IBu
	Smp_138500.1		Smp_341480.2	Smp_058980.2		Smp_104960.1	Smp_029900.1	Smp_010930.1	Smp_341620.3			SmLNCA158761-IBu
	Smp_139410.1		Smp_341880.1	Smp_058990.1		Smp_105020.1	Smp_029940.1	Smp_011030.1	Smp_341830.1			SmLNCA161176-IBu
	Smp_139540.1		Smp_341890.1	Smp_058990.2		Smp_105180.1	Smp_029940.2	Smp_011640.2	Smp_342070.1			SmLNCA161186-IBu
	Smp_139650.1		Smp_342520.1	Smp_059130.1		Smp_105700.1	Smp_029990.1	Smp_011680.2	Smp_342070.2			SmLNCA161663-IBu
	Smp_140000.1		Smp_342560.1	Smp_059150.1		Smp_105930.1	Smp_030400.1	Smp_011870.1	Smp_342490.1			SmLNCA162548-IBu
	Smp_140020.2		Smp_342650.1	Smp_059810.1		Smp_105970.1	Smp_030440.1	Smp_011980.2	Smp_342620.1			SmLNCA163008-IBu
	Smp_140270.1		Smp_342910.2	Smp_059980.1		Smp_110280.2	Smp_030760.1	Smp_012150.1	Smp_342750.1			SmLNCA163174-IBu
	Smp_140270.2		Smp_342940.1	Smp_060080.1		Smp_112480.1	Smp_030780.2	Smp_012150.3	Smp_342890.2			SmLNCA163379-IBu
	Smp_140520.1		Smp_343990.1	Smp_060090.1		Smp_119310.1	Smp_030910.1	Smp_012200.2	Smp_344320.1			SmLNCA163627-IBu
	Smp_140560.1		Smp_343990.2	Smp_060190.1		Smp_121190.1	Smp_031020.1	Smp_012280.1	Smp_344920.3			SmLNCA164803-IBu
	Smp_140580.1		Smp_344000.1	Smp_060220.1		Smp_121580.1	Smp_031040.1	Smp_012350.2	Smp_345000.1			SmLNCA165595-IBu
	Smp_140580.2		Smp_344120.1	Smp_060760.1		Smp_121610.1	Smp_031390.1	Smp_012470.1	Smp_345140.1			SmLNCA165618-IBu
	Smp_140820.2		Smp_344130.1	Smp_061200.1		Smp_121990.4	Smp_032280.1	Smp_012480.1	Smp_345350.2			SmLNCA165621-IBu
	Smp_140950.2		Smp_344570.1	Smp_062120.1		Smp_122630.2	Smp_032500.2	Smp_012480.3	Smp_345400.1			SmLNCA165629-IBu
	Smp_141010.3		Smp_344770.2	Smp_062420.1		Smp_122890.1	Smp_033050.1	Smp_012570.1	Smp_345560.5			SmLNCA165631-IBu
	Smp_141150.1		Smp_344800.1	Smp_062630.1		Smp_122910.1	Smp_033140.1	Smp_012800.1	Smp_345680.1			SmLNCA165632-IBu
	Smp_141290.1		Smp_344890.1	Smp_062640.1		Smp_122960.2	Smp_033260.1	Smp_012930.1	Smp_346220.1			SmLNCA165641-IBu
	Smp_141310.1		Smp_344980.4	Smp_062970.1		Smp_123040.2	Smp_033530.1	Smp_013060.1	Smp_346640.5			SmLNCA165797-IBu
	Smp_141650.1		Smp_345320.1	Smp_063250.2		Smp_123040.3	Smp_033600.1	Smp_013540.1	Smp_347050.1			SmLNCA165835-IBu
	Smp_141660.2		Smp_345340.1	Smp_063300.1		Smp_123320.1	Smp_033670.1	Smp_013950.1	Smp_347140.2			SmLNCA165836-IBu
	Smp_141660.4		Smp_345360.1	Smp_063350.1		Smp_123340.1	Smp_033970.1	Smp_014260.1	Smp_347640.1			SmLNCA165882-IBu
	Smp_141970.1		Smp_345460.1	Smp_063640.1		Smp_123390.2	Smp_034120.2	Smp_014280.1	Smp_347670.1			SmLNCA166093-IBu
	Smp_142050.2		Smp_345560.1	Smp_063650.1		Smp_123450.3	Smp_034980.3	Smp_014400.2				SmLNCA166195-IBu
	Smp_142150.2		Smp_345880.1	Smp_064150.1		Smp_123500.1	Smp_034980.5	Smp_014410.1				SmLNCA166504-IBu
	Smp_142620.1		Smp_346180.1	Smp_064380.1		Smp_123570.1	Smp_035030.1	Smp_014620.1				SmLNCA166964-IBu
	Smp_143240.1		Smp_346200.1	Smp_064380.3		Smp_123570.2	Smp_035180.1	Smp_014670.1				SmLNCA167164-IBu
	Smp_143490.1		Smp_346450.2	Smp_064860.1		Smp_123600.1	Smp_035210.1	Smp_015050.1				SmLNCA167807-IBu
	Smp_143690.2		Smp_346680.2	Smp_065150.1		Smp_123720.2	Smp_035310.1	Smp_015820.1				SmLNCA168060-IBu
	Smp_143700.2		Smp_346800.1	Smp_065190.1		Smp_123860.1	Smp_035430.1	Smp_016380.1				SmLNCA168302-IBu
	Smp_143860.1		Smp_346930.2	Smp_065980.1		Smp_123940.1	Smp_035730.1	Smp_016540.1				SmLNCA169210-IBu
	Smp_144120.1		Smp_347220.1	Smp_066050.1		Smp_124240.2	Smp_036020.2	Smp_016640.1				SmLNCA170287-IBu
	Smp_144380.1		Smp_347390.1	Smp_066740.1		Smp_124320.1	Smp_036220.1	Smp_017010.1				SmLNCA170490-IBu
	Smp_144430.2		Smp_347540.2	Smp_066940.1		Smp_124710.1	Smp_036720.1	Smp_017010.2				SmLNCA170698-IBu
	Smp_144450.1		Smp_347990.3	Smp_067000.3		Smp_124850.1	Smp_037960.1	Smp_017070.1				SmLNCA172344-IBu
	Smp_144570.3		Smp_900010.1	Smp_067090.2		Smp_125270.1	Smp_038100.1	Smp_017290.1				SmLNCA172896-IBu
	Smp_144600.1		Smp_900080.1	Smp_067140.1		Smp_125320.1	Smp_038420.2	Smp_017520.2				SmLNCA172968-IBu
	Smp_144720.5			Smp_067260.1		Smp_125370.1	Smp_038950.1	Smp_017610.1				SmLNCA173970-IBu
	Smp_144770.1			Smp_067490.1		Smp_125790.1	Smp_038960.1	Smp_017660.1				SmLNCA174325-IBu
	Smp_145320.5			Smp_067930.1		Smp_125870.1	Smp_039180.1	Smp_017710.2				SmLNCA174328-IBu
	Smp_145560.2			Smp_068070.1		Smp_125940.2	Smp_040130.1	Smp_017860.1				SmLNCA174330-IBu
	Smp_145560.5			Smp_068300.1		Smp_125940.3	Smp_040280.1	Smp_017870.1				SmLNCA174332-IBu
	Smp_145620.1			Smp_068420.1		Smp_126370.1	Smp_040800.1	Smp_017880.1				SmLNCA174867-IBu
	Smp_145650.1			Smp_068480.1		Smp_126800.3	Smp_041060.1	Smp_017880.2				SmLNCA175909-IBu
	Smp_145650.2			Smp_068580.1		Smp_126860.1	Smp_041190.2	Smp_018170.1				SmLNCA177453-IBu
	Smp_145980.1			Smp_068710.1		Smp_127140.1	Smp_041460.1	Smp_018240.2				SmLNCA177772-IBu
	Smp_145980.2			Smp_068990.1		Smp_127280.3	Smp_041480.1	Smp_018360.1				SmLNCA177774-IBu
	Smp_146160.1			Smp_069380.1		Smp_127310.1	Smp_041500.2	Smp_018550.1				SmLNCA177900-IBu
	Smp_146310.2			Smp_069600.2		Smp_127380.1	Smp_041630.1	Smp_018640.1				SmLNCS100833-IBu
	Smp_146340.2			Smp_069760.1		Smp_127660.2	Smp_041890.1	Smp_018760.1				SmLNCS103786-IBu
	Smp_146360.2			Smp_069840.1		Smp_128690.3	Smp_042030.1	Smp_018950.1				SmLNCS104756-IBu
	Smp_146720.1			Smp_069870.1		Smp_128750.2	Smp_042080.1	Smp_019060.2				SmLNCS105313-IBu
	Smp_146760.2			Smp_070330.1		Smp_128760.1	Smp_042210.1	Smp_019310.1				SmLNCS105314-IBu
	Smp_146840.1			Smp_070380.1		Smp_128810.2	Smp_042300.1	Smp_019430.1				SmLNCS107662-IBu
	Smp_147250.1			Smp_070770.1		Smp_129120.1	Smp_042530.1	Smp_019440.1				SmLNCS107919-IBu
	Smp_147410.1			Smp_071000.1		Smp_129250.1	Smp_042550.2	Smp_019630.2				SmLNCS110305-IBu
	Smp_147420.1			Smp_071380.1		Smp_129430.1	Smp_042590.1	Smp_019640.1				SmLNCS111220-IBu
	Smp_147470.1			Smp_071560.1		Smp_129580.1	Smp_042670.1	Smp_019680.1				SmLNCS111281-IBu
	Smp_147570.2			Smp_071880.2		Smp_129640.3	Smp_042740.1	Smp_019680.2				SmLNCS111416-IBu
	Smp_148400.1			Smp_071880.3		Smp_129670.3	Smp_042990.1	Smp_019690.1				SmLNCS116939-IBu
	Smp_148670.1			Smp_071950.1		Smp_129900.2	Smp_043210.1	Smp_019820.1				SmLNCS117379-IBu
	Smp_149660.2			Smp_072560.1		Smp_129970.1	Smp_043250.1	Smp_019840.1				SmLNCS120473-IBu
	Smp_149950.1			Smp_072640.1		Smp_130430.1	Smp_043350.1	Smp_020060.1				SmLNCS122216-IBu
	Smp_150140.2			Smp_072980.1		Smp_130580.1	Smp_044260.2	Smp_020300.1				SmLNCS122409-IBu
	Smp_150340.1			Smp_073300.1		Smp_130620.1	Smp_044550.1	Smp_020300.2				SmLNCS125559-IBu
	Smp_150610.1			Smp_073500.1		Smp_130680.1	Smp_044550.2	Smp_020370.1				SmLNCS126036-IBu
	Smp_150860.1			Smp_073590.1		Smp_130910.2	Smp_044550.3	Smp_020450.1				SmLNCS126412-IBu
	Smp_151480.1			Smp_073620.1		Smp_130910.3	Smp_044560.1	Smp_020480.1				SmLNCS126445-IBu
	Smp_152090.1			Smp_073880.1		Smp_131250.1	Smp_044690.1	Smp_020760.1				SmLNCS128973-IBu
	Smp_152370.3			Smp_074330.1		Smp_131320.1	Smp_044800.1	Smp_020770.1				SmLNCS129344-IBu
	Smp_153660.1			Smp_074470.1		Smp_131460.1	Smp_044920.1	Smp_020800.1				SmLNCS129634-IBu
	Smp_153700.1			Smp_074560.2		Smp_131990.1	Smp_045040.1	Smp_021040.3				SmLNCS130595-IBu
	Smp_153720.2			Smp_074770.1		Smp_132000.2	Smp_045040.2	Smp_021220.1				SmLNCS130736-IBu
	Smp_153870.1			Smp_074780.1		Smp_132120.1	Smp_045360.1	Smp_021330.1				SmLNCS132167-IBu
	Smp_153970.2			Smp_074950.1		Smp_132350.1	Smp_045430.1	Smp_021800.1				SmLNCS136478-IBu
	Smp_154160.1			Smp_075110.2		Smp_133080.1	Smp_045490.1	Smp_021960.1				SmLNCS137214-IBu
	Smp_154250.2			Smp_075130.1		Smp_133090.1	Smp_045500.1	Smp_022090.1				SmLNCS139132-IBu
	Smp_154320.1			Smp_076150.3		Smp_133110.2	Smp_045590.2	Smp_022130.2				SmLNCS139497-IBu
	Smp_154370.1			Smp_076300.1		Smp_133170.2	Smp_045650.1	Smp_022320.1				SmLNCS143074-IBu
	Smp_154560.1			Smp_076740.1		Smp_133350.1	Smp_045860.3	Smp_022660.1				SmLNCS143165-IBu
	Smp_154760.2			Smp_076960.1		Smp_133380.1	Smp_045920.2	Smp_022700.1				SmLNCS144993-IBu
	Smp_155900.1			Smp_076990.1		Smp_133620.1	Smp_046130.1	Smp_022740.1				SmLNCS145579-IBu
	Smp_155970.1			Smp_077020.1		Smp_133660.1	Smp_046410.1	Smp_022810.1				SmLNCS146228-IBu
	Smp_156150.1			Smp_078320.1		Smp_133710.1	Smp_046680.1	Smp_022890.2				SmLNCS146931-IBu
	Smp_156160.3			Smp_078640.1		Smp_134080.1	Smp_046740.1	Smp_022990.1				SmLNCS150584-IBu
	Smp_156740.1			Smp_079050.1		Smp_134080.3	Smp_046800.2	Smp_023170.1				SmLNCS150685-IBu
	Smp_157310.1			Smp_079230.1		Smp_134160.3	Smp_046810.1	Smp_023230.1				SmLNCS151857-IBu
	Smp_157350.1			Smp_079270.1		Smp_134410.3	Smp_047060.1	Smp_023250.2				SmLNCS152334-IBu
	Smp_157540.1			Smp_079430.1		Smp_134480.1	Smp_047330.2	Smp_023270.1				SmLNCS153527-IBu
	Smp_157560.1			Smp_079560.1		Smp_135140.1	Smp_047450.1	Smp_023550.1				SmLNCS153861-IBu
	Smp_157780.1			Smp_080530.3		Smp_135540.3	Smp_047550.1	Smp_023620.1				SmLNCS154222-IBu
	Smp_157930.1			Smp_080550.2		Smp_135710.1	Smp_047650.1	Smp_023700.1				SmLNCS156510-IBu
	Smp_158030.1			Smp_080610.1		Smp_135880.1	Smp_048080.1	Smp_024240.1				SmLNCS158211-IBu
	Smp_158460.2			Smp_080730.1		Smp_135880.2	Smp_048080.3	Smp_024380.1				SmLNCS158236-IBu
	Smp_158480.1			Smp_081460.2		Smp_135910.3	Smp_048430.3	Smp_024660.1				SmLNCS159120-IBu
	Smp_159090.1			Smp_082820.1		Smp_136050.1	Smp_048830.1	Smp_024800.1				SmLNCS159611-IBu
	Smp_159090.3			Smp_083030.1		Smp_136510.1	Smp_048880.1	Smp_025160.3				SmLNCS160603-IBu
	Smp_159120.1			Smp_083130.1		Smp_136550.1	Smp_049170.1	Smp_025260.1				SmLNCS160742-IBu
	Smp_159510.1			Smp_083150.1		Smp_136710.1	Smp_049390.1	Smp_025550.3				SmLNCS161475-IBu
	Smp_159590.1			Smp_083200.1		Smp_137120.1	Smp_049390.2	Smp_025830.1				SmLNCS161596-IBu
	Smp_160090.1			Smp_083410.1		Smp_137160.1	Smp_049580.1	Smp_026160.1				SmLNCS161888-IBu
	Smp_160180.1			Smp_083650.1		Smp_137190.1	Smp_050110.1	Smp_026230.1				SmLNCS162147-IBu
	Smp_160360.3			Smp_083710.1		Smp_137280.1	Smp_050160.1	Smp_026260.1				SmLNCS163036-IBu
	Smp_161120.1			Smp_084060.1		Smp_137330.1	Smp_051070.1	Smp_026510.1				SmLNCS165719-IBu
	Smp_161130.1			Smp_084460.1		Smp_137410.1	Smp_051130.1	Smp_026540.1				SmLNCS165738-IBu
[truncated: 2,371 more rows]

## Sheet: Table S6
Table S6. List of primers used in RT-qPCR.
LincRNAs
[truncated: 53 more rows]

## Sheet: Table S7
Table S7: Cts (Cycle Threshold) of the lncRNAs and Smps obtained in the RT-qPCR assays
[truncated: 31 more rows]
[truncated: 20 more columns]
